# Supplementary material for: Access to dialkylated allylic stereogenic centers by Ni-catalysed enantioselective hydrovinylation of unactivated alkenes
Source: Royal Society of Chemistry journal article supplement (doi:10.1039/d2sc04350e), 2022-01-01
Supplement: d2sc04350e1.pdf [file d2sc04350e1.pdf]

## Supporting Information

for

### Access to Dialkylated Allylic Stereogenic Centers by Ni-Catalysed Enantioselective Hydrovinylation of Unactivated Alkenes

Jian-Xin Zhang,<sup>†</sup> Peng-Fei Yang,<sup>†</sup> and Wei Shu<sup>†,\*</sup>

<sup>†</sup>*Shenzhen Grubbs Institute, Department of Chemistry, and Guangdong Provincial Key Laboratory of Catalysis, Southern University of Science and Technology, Shenzhen 518055, Guangdong, P. R. China*

\*E-mail: [shuw@sustech.edu.cn](mailto:shuw@sustech.edu.cn)

### Table of Contents

|                                                                                   |      |
|-----------------------------------------------------------------------------------|------|
| I. General information.....                                                       | S2   |
| II. Preparation of chiral ligands .....                                           | S2   |
| III. Preparation of olefins and electrophiles.....                                | S4   |
| IV. Evaluation of reaction parameters.....                                        | S12  |
| V. General procedures for enantioselective hydroalkenylations of alkenes.....     | S18  |
| VI. Characterization of products.....                                             | S19  |
| VII. Mechanistic experiments .....                                                | S36  |
| VIII. Scale-up reaction and derivatization of coupling products .....             | S39  |
| IX. X-Ray diffraction data of 4q.....                                             | S43  |
| X. References .....                                                               | S44  |
| XI. <sup>1</sup> H NMR, <sup>13</sup> C NMR and <sup>19</sup> F NMR spectra ..... | S45  |
| XII. HPLC traces .....                                                            | S112 |

## I. General information

**General words:** NMR spectra were recorded on 400 MHz or 600 MHz Bruker spectrometers. Chemical shifts are given in ppm. The spectra are calibrated to the residual  $^1\text{H}$  and  $^{13}\text{C}$  signals of the solvents. Multiplicities are abbreviated as follows: singlet (s), doublet (d), triplet (t), quartet (q), doublet-doublet (dd), quintet (quint), septet (sept), multiplet (m), and broad (br). High-resolution electrospray ionization and electronic impact mass spectrometry was performed on a Thermo Scientific Q Exactive mass spectrometer (mass analyzer type: Orbitrap). A mass accuracy  $\leq 2$  ppm was obtained in the peak matching acquisition mode by using a solution containing 2  $\mu\text{L}$  PEG200, 2  $\mu\text{L}$  PPG450, and 1.5 mg NaOAc (all obtained from Sigma-Aldrich, CH-Buchs) dissolved in 100 mL MeOH (HPLC Supra grade, Scharlau, E-Barcelona) as internal standard.

**Materials and Methods:** Unless otherwise noted, commercial reagents were purchased from Energy-Chemical Limited, J&K, Adamas-beta®, Aladdin, Macklin Reagent, Bidepharm and used directly without further purification. Solvents were purchased in HPLC quality, degassed by purging with nitrogen and dried over activated molecular sieves of appropriate size. Alternatively, they were purged with argon and passed through alumina columns in a solvent purification system (Innovative Technology). Conversion was monitored by thin layer chromatography (TLC) using Merck TLC silica gel 60 F254. Compounds were visualized by UV light at 254 nm and by dipping the plates in an ethanolic vanillin/sulfuric acid solution or an aqueous potassium permanganate solution followed by heating. Flash column chromatography was performed over silica gel (300-400 mesh).

## II. Preparation of chiral ligands

### (4*R*,4'*R*,5*R*,5'*R*)-2,2'-(propane-2,2-diyl)bis(4,5-diphenyl-4,5-dihydrooxazole) (L1)

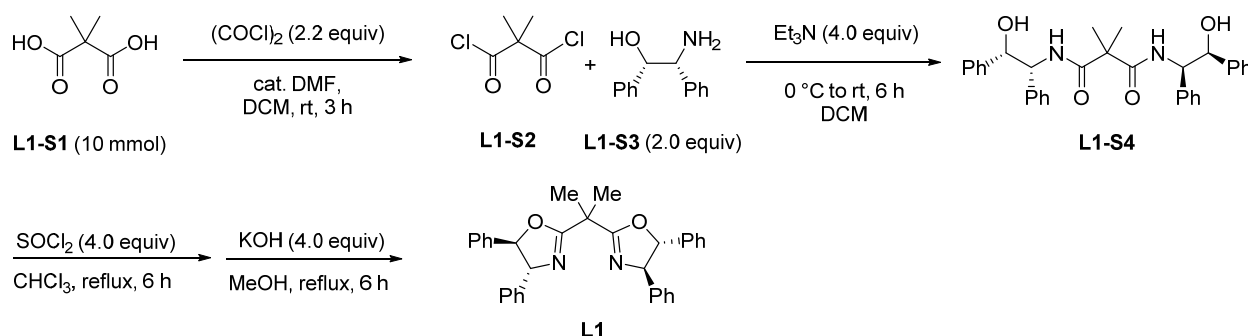

General procedure of preparation of chiral ligand,<sup>1</sup> a mixture of dimethylmalonic acid **L1-S1** (1.32 g, 10.0 mmol) in dry DCM (20.0 mL) was stirred at room temperature, oxalyl chloride (2.8 g, 22.0 mmol, 2.2 equiv) was added, then 1 drop DMF was added. The mixture was stirred at room temperature for 3 h. The solvent was removed under reduced pressure to afford the corresponding crude acid chloride, which was directly used for the next step without further purification.

**L1-S2** (obtained in previous step) dissolved in dry DCM (10.0 mL) was added dropwise to a solution of chiral (1*S*,2*R*)-2-amino-1,2-diphenylethan-1-ol **L1-S3** (4.26 g, 20.0 mmol) and Et<sub>3</sub>N (4.1 g, 40.0 mmol) in dry DCM (40.0 mL) cooled to 0 °C. Then the reaction mixture was allowed warm to room temperature and stirred for 6 h. The mixture was washed with H<sub>2</sub>O, dried with Na<sub>2</sub>SO<sub>4</sub>, filtered and concentrated in vacuo, which was directly used for the next step without further purification.

The chiral amide **L1-S4** (5.2 g, 10.0 mmol) was dissolved in CHCl<sub>3</sub> (50.0 mL), and the solution was cooled to 0 °C. A solution of SOCl<sub>2</sub> (4.8 g, 40.0 mmol, 4.0 equiv) was added dropwise. The reaction mixture was stirred at 70 °C for 6 h, then cooled to room temperature. The reaction mixture was quenched by H<sub>2</sub>O, then extracted with DCM. Then solvent was removed under reduced pressure to afford the corresponding crude product, which was directly used for the next step without further purification. Then dissolved in MeOH (40.0 mL), and KOH (2.3 g, 40.0 mmol, 4.0 equiv) was added. The suspension was stirred at reflux for 6 h. When the reaction was complete, H<sub>2</sub>O was added, and the mixture was extracted with DCM. The combined organic phase was washed with brine, dried with anhydrous Na<sub>2</sub>SO<sub>4</sub>, filtered, and concentrated under vacuum. The residue was purified by flash column chromatography (PE: EtOAc = 6: 1) to afford chiral ligand **L1** as a white solid (3.1 g, 63% yield).

<sup>1</sup>H NMR (400 MHz, Chloroform-*d*) δ 7.47 – 7.22 (m, 20H), 5.36 (d, *J* = 7.6 Hz, 2H), 5.16 (d, *J* = 7.6 Hz, 2H), 1.93 (s, 6H).

<sup>13</sup>C NMR (101 MHz, Chloroform-*d*) δ 169.8, 142.1, 140.5, 128.9, 128.9, 128.5, 127.8, 126.8, 126.0, 89.9, 78.7, 39.5, 25.0.

HRMS (ESI-TOF) Calcd for C<sub>33</sub>H<sub>31</sub>N<sub>2</sub>O<sub>2</sub> (M+H)<sup>+</sup> 487.2380. Found 487.2374.

**(4*R*,4'*R*)-2,2'-(propane-2,2-diyl)bis(5,5-dimethyl-4-phenyl-4,5-dihydrooxazole) (**L2**)**

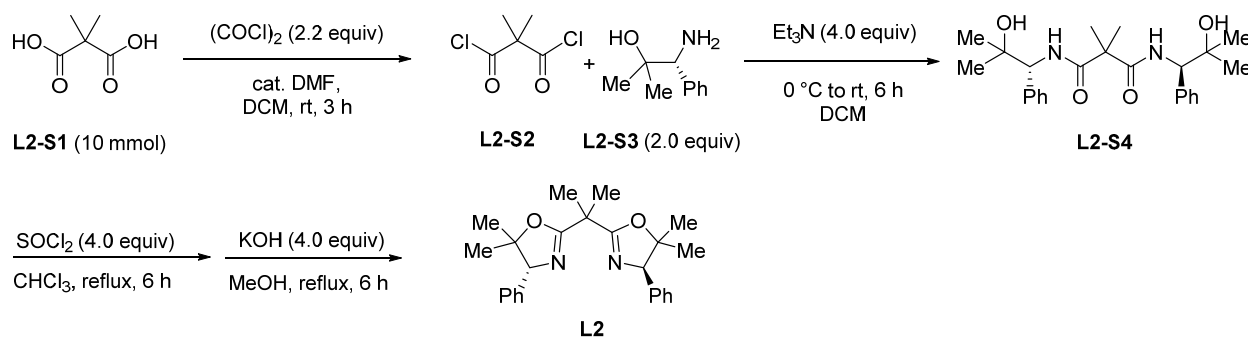

General procedure of preparation of chiral ligand,<sup>2</sup> a mixture of dimethylmalonic acid **L2-S1** (1.32 g, 10.0 mmol, 1.0 equiv) in dry DCM (20.0 mL) was stirred at room temperature, oxalyl chloride (2.8g, 22.0 mmol, 2.2 equiv) was added, then 1 drop DMF was added. The mixture was stirred at room temperature for 3 h. The solvent was removed under reduced pressure to afford the corresponding crude acid chloride, which was directly used for the next step without further purification.

**L2-S2** (obtained in previous step) dissolved in dry DCM (10.0 mL) was added dropwise to a solution of chiral **L2-S3** (4.26 g, 20.0 mmol) and Et<sub>3</sub>N (4.1 g, 40.0 mmol) in dry DCM (40.0 mL) cooled to 0 °C. Then the reaction mixture was allowed warm to room temperature and stirred for 6 h. The mixture was washed

with H<sub>2</sub>O, dried with Na<sub>2</sub>SO<sub>4</sub>, filtered and concentrated in vacuo, which was directly used for the next step without further purification.

The chiral amide **L2-S4** (5.2 g, 10.0 mmol) was dissolved in CHCl<sub>3</sub> (50.0 mL), and the solution was cooled to 0 °C. A solution of SOCl<sub>2</sub> (4.8 g, 40.0 mmol, 4.0 equiv) was added dropwise. The reaction mixture was stirred at 70 °C for 6 h, then cooled to room temperature. The reaction mixture was quenched by H<sub>2</sub>O, then extracted with DCM. Then solvent was removed under reduced pressure to afford the corresponding crude product, which was directly used for the next step without further purification. Then dissolved in MeOH (40.0 mL), and KOH (2.3 g, 40.0 mmol, 4.0 equiv) was added. The suspension was stirred at reflux for 6 h. When the reaction was complete, H<sub>2</sub>O was added, and the mixture was extracted with DCM. The combined organic phase was washed with brine, dried with anhydrous Na<sub>2</sub>SO<sub>4</sub>, filtered, and concentrated under vacuum. The residue was purified by flash column chromatography (PE: EtOAc = 6: 1) to afford chiral ligand **L2** as a white solid (1.97 g, 49% yield).

<sup>1</sup>H NMR (400 MHz, Chloroform-*d*) δ 7.30 – 7.07 (m, 10H), 4.77 (s, 2H), 1.61 (s, 6H), 1.49 (s, 6H), 0.79 (s, 6H).

<sup>13</sup>C NMR (101 MHz, Chloroform-*d*) δ 169.4, 139.0, 128.2, 127.5, 127.4, 78.0, 39.0, 29.2, 24.1, 23.8.

HRMS (ESI-TOF) Calcd for C<sub>25</sub>H<sub>31</sub>N<sub>2</sub>O<sub>2</sub> (M+H)<sup>+</sup> 391.2380. Found 391.2375.

### III.Preparation of olefins and electrophiles

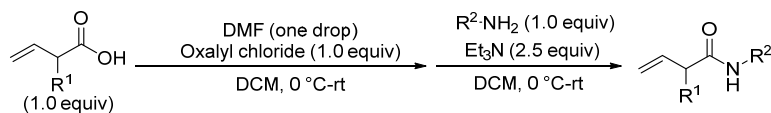

**General procedure (A) for preparation of terminal olefins.** To a solution of vinylacetic acid (5.0mmol, 1.0 equiv) in dry CH<sub>2</sub>Cl<sub>2</sub> was added one drop DMF, then oxalyl chloride (1.0 equiv) in dry CH<sub>2</sub>Cl<sub>2</sub> was added dropwise to the above solution at 0 °C. The resulting mixture was stirred at room temperature for 3 h. Then the resulting solution was added dropwise to a solution of amine (1.0 equiv) and Et<sub>3</sub>N (2.5 equiv) in dry CH<sub>2</sub>Cl<sub>2</sub> at 0 °C, the mixture was then stirred at room temperature for 3 h. The mixture was diluted with CH<sub>2</sub>Cl<sub>2</sub> and washed with water and brine. The organic phase was dried over anhydrous Na<sub>2</sub>SO<sub>4</sub>, filtered, and purified by flash chromatography to afford the desired olefins.

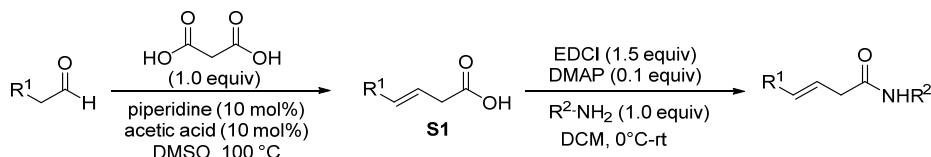

**General procedure (B) for preparation of internal olefins.** Acid (**S1**) was prepared following the literature procedure. To a solution of aldehyde (10.0 mmol, 1.0 equiv) and malonic acid (2.08 g, 20.0 mmol, 2.0 equiv) in DMSO was added piperidine (85.0 mg, 1.0 mmol, 10 mol%) and acetic acid (60.0 mg, 1.0 mmol, 10 mol%). The resulting mixture was heated to 100 °C and stirred for overnight. Then the mixture



was cooled to room temperature, diluted with water and ethyl acetate. The organic phase was washed with brine, dried with anhydrous Na<sub>2</sub>SO<sub>4</sub>, filtered, and purified by flash chromatography to afford acid (**S1**).

To a solution of  $\beta,\gamma$ -unsaturated carboxylic acid (5.0 mmol, 1.0 equiv.) in dichloromethane (10.0 mL) were added 1-ethyl-3-(3-(dimethylamino) propyl)-carbodiimide hydrochloride (EDCI) (1.4 g, 7.5 mmol, 1.5 equiv), DMAP (61.0 mg, 0.50 mmol, 0.1 equiv) and amine (5.5 mmol, 1.1 equiv). The reaction was stirred at room temperature for 12 h. After completion of the reaction, DCM (50.0 mL) was added to the mixture and washed with 1% HCl (10.0 mL) and brine (20.0 mL). The organic layer was dried over Na<sub>2</sub>SO<sub>4</sub> and concentrated under reduced pressure. The residue was purified by column chromatography on silica gel with EtOAc/PE mixture as eluent.

**(E)-N-phenylpent-3-enamide (1a)**

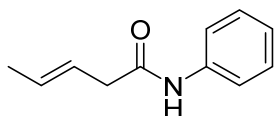

Following the GP-B, **1a** was purified by flash chromatography (PE/EA = 5: 1), white solid (0.77 g, 88% yield).

**<sup>1</sup>H NMR** (600 MHz, Chloroform-*d*)  $\delta$  7.44 – 7.43 (m, 2H), 7.32 (s, 1H), 7.25 – 7.23 (m, 2H), 7.04 – 7.02 (m, 1H), 5.69 – 5.65 (m, 1H), 5.59 – 5.54 (m, 1H), 3.03 (d, *J* = 7.1 Hz, 2H), 1.71 (d, *J* = 6.3 Hz, 3H).

**<sup>13</sup>C NMR** (151 MHz, Chloroform-*d*)  $\delta$  169.6, 137.9, 132.1, 129.1, 124.5, 123.6, 119.9, 41.8, 18.2.

**HRMS (ESI-TOF)** Calcd for C<sub>11</sub>H<sub>14</sub>NO (*M*+H)<sup>+</sup> 176.1070. Found 176.1069.

**(E)-N-(4-acetylphenyl)pent-3-enamide (1b)**

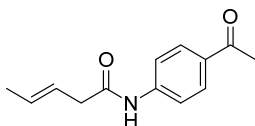

Following the GP-B, **1b** was purified by flash chromatography (PE/EA = 5: 1), white solid (0.79 g, 73% yield).

**<sup>1</sup>H NMR** (400 MHz, Chloroform-*d*)  $\delta$  8.01 (s, 1H), 7.90 (d, *J* = 8.8 Hz, 2H), 7.63 (d, *J* = 8.8 Hz, 2H), 5.81 – 5.67 (m, 1H), 5.67 – 5.57 (m, 1H), 3.12 (d, *J* = 6.9 Hz, 2H), 2.55 (s, 3H), 1.74 (d, *J* = 6.1 Hz, 3H).

**<sup>13</sup>C NMR** (101 MHz, Chloroform-*d*)  $\delta$  197.2, 170.1, 142.4, 132.8, 131.9, 129.7, 123.0, 118.9, 41.6, 26.5, 18.1.

**HRMS (ESI-TOF)** Calcd for C<sub>13</sub>H<sub>16</sub>NO<sub>2</sub> (*M*+H)<sup>+</sup> 218.1176. Found 218.1174.

**(E)-N-(4-(trifluoromethyl)phenyl)pent-3-enamide (1c)**

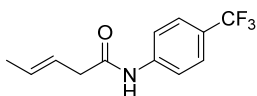

Following the GP-B, **1c** was purified by flash chromatography (PE/EA = 5: 1), white solid (0.95 g, 78% yield).

**<sup>1</sup>H NMR** (400 MHz, Chloroform-*d*)  $\delta$  7.79 (s, 1H), 7.54 (d, *J* = 8.5 Hz, 2H), 7.43 (d, *J* = 8.5 Hz, 2H), 5.65 – 5.58 (m, 1H), 5.55 – 5.47 (m, 1H), 3.02 (d, *J* = 6.4 Hz, 2H), 1.72 – 1.56 (s, 3H).

**<sup>13</sup>C NMR** (101 MHz, Chloroform-*d*)  $\delta$  170.2, 141.0, 132.4, 128.3, 126.3 (q,  $J$  = 3.6 Hz), 124.2 (q,  $J$  = 272.7 Hz), 123.1, 119.5, 41.7, 18.2.

**<sup>19</sup>F NMR** (376 MHz, Chloroform-*d*)  $\delta$  -62.14 (s, 3F).

**HRMS (ESI-TOF)** Calcd for C<sub>12</sub>H<sub>13</sub>F<sub>3</sub>NO (M+H)<sup>+</sup> 244.0944. Found 244.0941.

**(*E*)-*N*-(4-methoxyphenyl)pent-3-enamide (1d)**

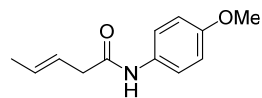

Following the GP-B, **1d** was purified by flash chromatography (PE/EA = 5: 1), white solid (0.71 g, 69% yield).

**<sup>1</sup>H NMR** (400 MHz, Chloroform-*d*)  $\delta$  7.36 – 7.26 (m, 3H), 6.77 (d,  $J$  = 9.0 Hz, 2H), 5.73 – 5.60 (m, 1H), 5.60 – 5.50 (m, 1H), 3.71 (s, 3H), 3.00 (d,  $J$  = 6.9 Hz, 2H), 1.69 (d,  $J$  = 7.4 Hz, 3H).

**<sup>13</sup>C NMR** (101 MHz, Chloroform-*d*)  $\delta$  169.5, 156.6, 131.8, 131.0, 123.7, 121.9, 114.2, 55.6, 41.5, 18.2.

**HRMS (ESI-TOF)** Calcd for C<sub>12</sub>H<sub>16</sub>NO<sub>2</sub> (M+H)<sup>+</sup> 206.1176. Found 206.1175.

**(*E*)-*N*-(thiophen-3-yl)pent-3-enamide (1e)**

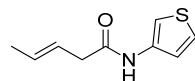

Following the GP-B, **1e** was purified by flash chromatography (PE/EA = 5: 1), white solid (0.62 g, 71% yield).

**<sup>1</sup>H NMR** (600 MHz, Chloroform-*d*)  $\delta$  8.29 (s, 1H), 7.47 – 7.46 (m, 1H), 7.11 – 7.10 (m, 1H), 6.95 – 6.94 (m, 1H), 5.64 – 5.55 (m, 1H), 5.55 – 5.43 (m, 1H), 2.99 (d,  $J$  = 6.9 Hz, 2H), 1.64 (d,  $J$  = 6.1 Hz, 3H).

**<sup>13</sup>C NMR** (151 MHz, Chloroform-*d*)  $\delta$  169.5, 135.7, 131.3, 124.4, 123.4, 121.3, 110.4, 40.9, 18.1.

**HRMS (ESI-TOF)** Calcd for C<sub>9</sub>H<sub>12</sub>NOS (M+H)<sup>+</sup> 182.0634. Found 182.0633.

**(*E*)-*N*-(4-methoxyphenyl)hex-3-enamide (1f)**

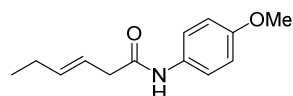

Following the GP-B, **1f** was purified by flash chromatography (PE/EA = 5: 1), white solid (0.75 g, 68% yield).

**<sup>1</sup>H NMR** (400 MHz, Chloroform-*d*)  $\delta$  7.67 (s, 1H), 7.39 (d,  $J$  = 9.0 Hz, 2H), 6.82 (d,  $J$  = 9.0 Hz, 2H), 5.80 – 5.65 (m, 1H), 5.65 – 5.51 (m, 1H), 3.76 (s, 3H), 3.06 (d,  $J$  = 7.0 Hz, 2H), 2.12 – 2.05 (m, 2H), 1.01 (t,  $J$  = 7.5 Hz, 3H).

**<sup>13</sup>C NMR** (101 MHz, Chloroform-*d*)  $\delta$  169.8, 156.4, 138.3, 131.1, 121.9, 121.6, 114.1, 55.5, 41.3, 25.7, 13.6.

**HRMS (ESI-TOF)** Calcd for C<sub>13</sub>H<sub>18</sub>NO<sub>2</sub> (M+H)<sup>+</sup> 220.1332. Found 220.1330.

**Ethyl (*E*)-4-(oct-3-enamido)benzoate (1g)**

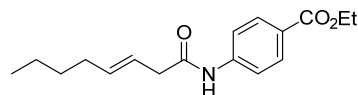

Following the GP-B, **1g** was purified by flash chromatography (PE/EA = 5: 1), white solid (1.0 g, 72% yield).

**<sup>1</sup>H NMR** (600 MHz, Chloroform-*d*)  $\delta$  8.02 (d, *J* = 8.6 Hz, 2H), 7.62 – 7.60 (m, 3H), 5.79 – 5.75 (m, 1H), 5.66 – 5.61 (m, 1H), 4.40 – 4.36 (q, *J* = 7.1 Hz, 2H), 3.15 (d, *J* = 7.1 Hz, 2H), 2.14 (q, *J* = 7.1 Hz, 2H), 1.46 – 1.34 (m, 7H), 0.94 (t, *J* = 7.1 Hz, 3H).

**<sup>13</sup>C NMR** (151 MHz, Chloroform-*d*)  $\delta$  169.8, 166.3, 142.0, 138.1, 130.9, 126.1, 122.0, 118.7, 61.0, 41.9, 32.4, 31.4, 22.4, 14.5, 14.0.

**HRMS (ESI-TOF)** Calcd for C<sub>17</sub>H<sub>24</sub>NO<sub>3</sub> (M+H)<sup>+</sup> 290.1751. Found 290.1752.

**(Z)-N-phenylhex-3-enamide (1h)**

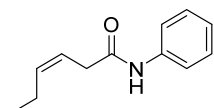

Following the GP-A, **1h** was purified by flash chromatography (PE/EA = 5: 1), white solid (0.83 g, 88% yield).

**<sup>1</sup>H NMR** (400 MHz, Chloroform-*d*)  $\delta$  7.66 (s, 1H), 7.43 (d, *J* = 8.0 Hz, 2H), 7.22 (t, *J* = 8.0 Hz, 2H), 7.03 – 6.99 (m, 1H), 5.80 – 5.61 (m, 1H), 5.61 – 5.47 (m, 1H), 3.09 (d, *J* = 7.5 Hz, 2H), 2.07 – 2.00 (m, 2H), 0.94 (t, *J* = 7.5 Hz, 3H).

**<sup>13</sup>C NMR** (101 MHz, Chloroform-*d*)  $\delta$  169.4, 137.9, 137.5, 129.0, 124.4, 120.9, 119.9, 36.1, 20.8, 14.0.

**HRMS (ESI-TOF)** Calcd for C<sub>12</sub>H<sub>16</sub>NO (M+H)<sup>+</sup> 190.1227. Found 190.1226.

**(E)-N,5-diphenylpent-3-enamide (1l)**

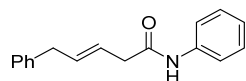

Following the GP-B, **1l** was purified by flash chromatography (PE/EA = 5: 1), white solid (0.76 g, 61% yield).

**<sup>1</sup>H NMR** (400 MHz, Chloroform-*d*)  $\delta$  7.54 (s, 1H), 7.38 – 7.36 (m, 2H), 7.23 – 7.17 (m, 4H), 7.14 – 7.09 (m, 3H), 7.01 – 6.97 (m, 1H), 5.85 – 5.70 (m, 1H), 5.64 – 5.56 (m, 1H), 3.32 (d, *J* = 6.8 Hz, 2H), 3.02 (d, *J* = 7.4 Hz, 2H).

**<sup>13</sup>C NMR** (101 MHz, Chloroform-*d*)  $\delta$  169.5, 140.0, 137.9, 135.6, 129.0, 128.7, 128.6, 126.4, 124.4, 123.9, 119.9, 41.4, 39.1.

**HRMS (ESI-TOF)** Calcd for C<sub>17</sub>H<sub>18</sub>NO (M+H)<sup>+</sup> 252.1383. Found 252.1381.

**Methyl (E)-8-oxo-8-(phenylamino)oct-5-enoate (1j)**

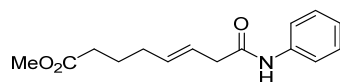

Following the GP-B, **1j** was purified by flash chromatography (PE/EA = 5: 1), white solid (0.81 g, 62% yield).

**<sup>1</sup>H NMR** (600 MHz, Chloroform-*d*)  $\delta$  7.55 – 7.51 (m, 3H), 7.32 – 7.26 (m, 2H), 7.11 – 7.09 (m, 1H), 5.70 – 5.62 (m, 2H), 3.67 (s, 3H), 3.11 (d,  $J$  = 5.4 Hz, 2H), 2.35 (t,  $J$  = 7.3 Hz, 2H), 2.15 – 2.13 (m, 2H), 1.79 – 1.74 (m, 2H).

**<sup>13</sup>C NMR** (151 MHz, Chloroform-*d*)  $\delta$  174.1, 169.4, 138.0, 135.8, 129.1, 124.4, 123.6, 120.0, 51.7, 41.7, 33.5, 32.0, 24.3.

**HRMS (ESI-TOF)** Calcd for C<sub>15</sub>H<sub>20</sub>NO<sub>3</sub> (M+H)<sup>+</sup> 262.1438. Found 262.1435.

## 2-Ethyl-*N*-phenylbut-3-enamide (**11**)

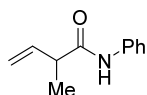

Following the GP-A, **11** was purified by flash chromatography (PE/EA = 5: 1), white solid (0.73 g, 77% yield).

**<sup>1</sup>H NMR** (400 MHz, Chloroform-*d*) 7.55 – 7.47 (m, 2H), 7.41 – 7.27 (m, 3H), 7.14 – 7.06 (m, 1H), 6.10 – 5.89 (m, 1H), 5.45 – 5.15 (m, 2H), 3.21 – 3.09 (m, 1H), 1.36 (d,  $J$  = 7.0 Hz, 3H).

**<sup>13</sup>C NMR** (101 MHz, Chloroform-*d*) 172.2, 138.2, 138.0, 129.0, 124.4, 119.9, 117.6, 46.5, 16.8.

**HRMS (ESI-TOF)** Calcd for C<sub>12</sub>H<sub>14</sub>NO (M+H)<sup>+</sup> 176.1070. Found 176.1073.

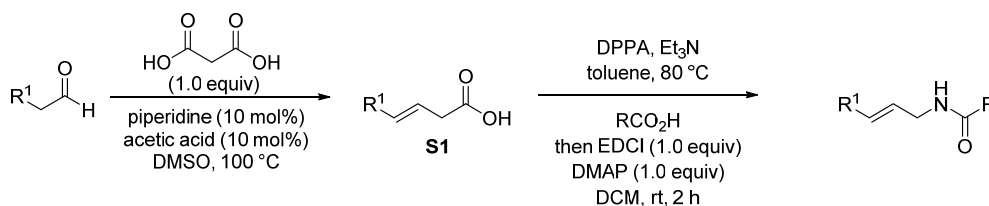

**General procedure (C) for preparation of  $\gamma$ -substituted allylic amide.**<sup>3</sup> To a 250-mL round bottomed flask was charged with malonic acid (2.1 g, 20.0 mmol, 2.0 equiv), piperidine (85.0 mg, 1.0 mmol, 10 mol%), acetic acid (60.0 mg, 1.0 mmol, 10 mol%), and aldehyde hydrocarbon (10.0 mmol, 1.0 equiv) in DMSO (20.0 mL). After the reaction mixture was stirred at 40 °C for 2 h, the solution was heated in an oil bath at 100 °C. A rapid evolution of carbon dioxide was observed. Heating was maintained until the evolution of carbon dioxide ceased. The solution was cooled to room temperature, poured into cold water (50.0 mL), and extracted with diethyl ether (3  $\times$  20.0 mL). The combined organic phase was washed with water (30.0 mL), brine (30.0 mL), and then dried over anhydrous MgSO<sub>4</sub>. After removal of the solvent, the crude  $\beta,\gamma$ -unsaturated acid **S1** was used for the next step without further purification.

To a solution of the crude acid **S1** in toluene (30.0 mL) was slowly added diphenylphosphoryl azide (DPPA) (2.75 g, 10.0 mmol) followed by addition of Et<sub>3</sub>N (1.12 g, 11.0 mmol). The resulting solution was stirred at 80 °C for 2 h. After cooling to room temperature, 1 M NaOH (20.0 mL) was added and the mixture was allowed to stir at rt for 2 h. The organic phase was then separated and concentrated. The residue was dissolved in CH<sub>2</sub>Cl<sub>2</sub> (20.0 mL) followed by sequential addition of RCO<sub>2</sub>H (10.0 mmol), EDCI (1.92 g, 10.0 mmol, 1.0 equiv) and DMAP (1.22 g, 1.0 mmol, 1.0 equiv) at 0 °C. The resulting mixture was allowed to warm to room temperature and stir at this temperature for additional 2 h. The reaction was then quenched by saturated aq. NaHCO<sub>3</sub> (50 mL) and extracted with diethyl ether twice (2  $\times$  50.0 mL). The combined

ethereal solution was dried over anhydrous  $\text{MgSO}_4$ . After removal of the solvent, the residue was purified by column chromatography on silica using PE/EtOAc as the eluent to afford the corresponding  $\gamma$ -substituted allylic amide. The yield is based on  $\text{RCO}_2\text{H}$ .

**(*E*)-*N*-(hept-2-en-1-yl)benzamide (1n)**

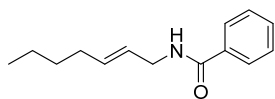

Following the GP-C, **1n** was purified by flash chromatography (PE/EA = 5: 1), white solid (1.52 g, 70% yield).

**$^1\text{H}$  NMR** (400 MHz, Chloroform-*d*)  $\delta$  7.81 – 7.71 (m, 2H), 7.52 – 7.45 (m, 1H), 7.47 – 7.39 (m, 2H), 6.20 (s, 1H), 5.73 – 5.65 (m, 1H), 5.59 – 5.47 (m, 1H), 4.01 (t,  $J$  = 5.8 Hz, 2H), 2.04 (q,  $J$  = 7.0 Hz, 2H), 1.39 – 1.28 (m, 4H), 0.89 (t,  $J$  = 7.0 Hz, 3H).

**$^{13}\text{C}$  NMR** (101 MHz, Chloroform-*d*)  $\delta$  167.4, 134.8, 134.4, 131.5, 128.7, 127.0, 125.5, 42.1, 32.1, 31.4, 22.3, 14.0.

**HRMS (ESI-TOF)** Calcd for  $\text{C}_{14}\text{H}_{20}\text{NO}$  ( $\text{M}+\text{H}$ ) $^+$  218.1540. Found 215.1538.

**General procedure D for the preparation of *E*-alkenyl bromides**

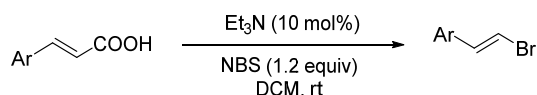

Following literature procedure,<sup>4</sup> a round-bottom flask was charged with cinnamic acid (10 mmol, 1.0 equiv), catalytic amounts of  $\text{Et}_3\text{N}$  (1.0 mmol, 101.0 mg) and DCM (50.0 mL). The mixture was stirred at room temperature for 10 minutes before the addition of NBS (4.3 g, 24.0 mmol, 1.2 equiv). Then, the mixture was stirred for 5 min at room temperature and monitored by TLC analysis. After total conversion of the substrate, the solvent was evaporated and the alkenyl bromide product was purified by silica gel chromatography (petroleum ether: ethyl acetate = 100: 1).

**General procedure E for the preparation of *E*-alkenyl bromides from aldehydes and ketones**

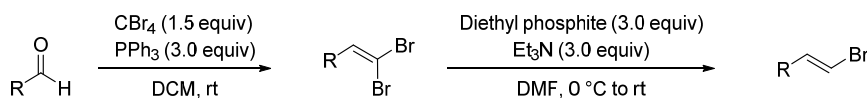

Following literature procedure,<sup>4</sup> to a flame-dried round-bottom flask was added aldehyde (10.0 mmol, 1.0 equiv),  $\text{CBr}_4$  (15.0 mmol, 1.5 equiv), and  $\text{CH}_2\text{Cl}_2$  (40.0 mL). The flask was cooled to 0 °C, after which a solution of  $\text{PPh}_3$  (30.0 mmol, 3.0 equiv) in  $\text{CH}_2\text{Cl}_2$  (30.0 mL) was added dropwise via addition funnel over 30 min. The solution was stirred at 0 °C for 1 h. About half the volume of  $\text{CH}_2\text{Cl}_2$  was then removed under reduced pressure. Hexane (50.0 mL) was added, and phosphine oxide was precipitated out. After filtration and evaporation of the solvent, the residue was dissolved in hexane (30.0 mL) which led to further precipitation. Filtration and evaporation of the solvent afforded the crude dibromide which was directly used in the next step.

To a solution of the crude dibromide (~ 5.0 mmol, 1 equiv) and NEt<sub>3</sub> (15.0 mmol, 3.0 equiv) in DMF (5 mL) was added diethyl phosphite (15.0 mmol, 3.0 equiv). The solution was stirred overnight at room temperature. Water (15.0 mL) was added to the mixture, which was extracted with hexane (2 × 25.0 mL). The combined organic phases were washed with an aqueous solution of HCl (1 M, 10.0 mL), dried over Na<sub>2</sub>SO<sub>4</sub>, filtered and concentrated. The crude residue was purified by silica gel chromatography.

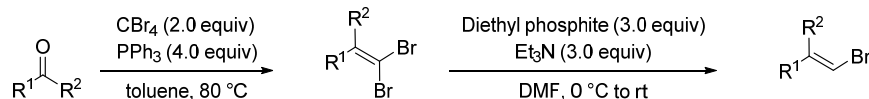

Following literature procedure,<sup>4</sup> A Schlenk flask was charged with ketone (5.0 mmol), CBr<sub>4</sub> (10.0 mmol, 2.0 equiv) and PPh<sub>3</sub> (20.0 mmol, 4.0 equiv). After degassing and refilling with N<sub>2</sub> twice, toluene (35.0 mL) was added through syringe. The flask was sealed and heated at 80 °C overnight. After cooling to room temperature, the mixture was filtered through a pad of silica gel and washed with hexanes. The solvent was then under reduced pressure and the product was purified by silica gel chromatography.

To a solution of the crude dibromide (~ 5.0 mmol, 1 equiv) and NEt<sub>3</sub> (15.0 mmol, 3.0 equiv) in DMF (5 mL) was added diethyl phosphite (15.0 mmol, 3.0 equiv). The solution was stirred overnight at room temperature. Water (15.0 mL) was added to the mixture, which was extracted with hexane (2 × 25.0 mL). The combined organic phases were washed with an aqueous solution of HCl (1 M, 10.0 mL), dried over Na<sub>2</sub>SO<sub>4</sub>, filtered and concentrated. The crude residue was purified by silica gel chromatography.

**(E)-(4-(2-bromovinyl)phenyl)(methyl)sulfane (2c)**

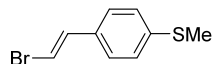

Following the GP-E, **2c** was purified by flash chromatography (PE), white solid (1.52 g, 70% yield).

<sup>1</sup>H NMR (400 MHz, Chloroform-*d*) δ 7.15 – 7.07 (m, 4H), 6.96 (d, *J* = 14.0 Hz, 1H), 6.64 (d, *J* = 14.0 Hz, 1H), 2.39 (s, 3H).

<sup>13</sup>C NMR (101 MHz, Chloroform-*d*) δ 139.0, 136.6, 132.8, 126.61, 126.56, 105.9, 15.7.

HRMS (ESI-TOF) Calcd for (M+H)<sup>+</sup> C<sub>9</sub>H<sub>10</sub>BrS 228.9681. Found 228.9673.

**(E)-1-(2-bromovinyl)-2-methoxybenzene (2i)**

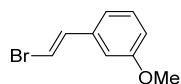

Following the GP-E, **2i** was purified by flash chromatography (PE), white solid (1.52 g, 70% yield).

<sup>1</sup>H NMR (400 MHz, Chloroform-*d*) δ 7.27 – 7.01 (m, 3H), 6.81 – 6.74 (m, 3H), 3.72 (s, 3H).

<sup>13</sup>C NMR (101 MHz, Chloroform-*d*) δ 156.6, 133.1, 129.4, 128.0, 124.8, 120.8, 111.0, 108.0, 55.4.

HRMS (ESI-TOF) Calcd for (M+H)<sup>+</sup> C<sub>9</sub>H<sub>10</sub>BrO 219.9910. Found 219.9907.

**(E)-1-bromo-3-(2-bromovinyl)benzene (2j)**

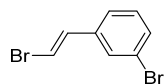

Following the GP-D, **2j** was purified by flash chromatography (PE), white solid (1.52 g, 70% yield).

**<sup>1</sup>H NMR** (400 MHz, Chloroform-*d*)  $\delta$  7.50 – 7.37 (m, 2H), 7.23 – 7.17 (m, 2H), 7.03 (d, *J* = 14.0 Hz, 1H), 6.80 (d, *J* = 14.0 Hz, 1H).

**<sup>13</sup>C NMR** (101 MHz, Chloroform-*d*)  $\delta$  137.9, 135.8, 131.2, 130.3, 129.0, 124.7, 122.9, 108.2.

**HRMS (ESI-TOF)** Calcd for (M+H)<sup>+</sup> C<sub>8</sub>H<sub>7</sub>Br<sup>81</sup>Br 262.8889. Found 262.8885.

**(*E*)-1-(2-bromovinyl)-2-fluorobenzene (2l)**

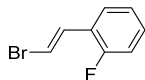

Following the GP-E, **2l** was purified by flash chromatography (PE), white solid (1.52 g, 70% yield).

**<sup>1</sup>H NMR** (400 MHz, Chloroform-*d*)  $\delta$  7.28 – 7.16 (m, 2H), 7.11 (d, *J* = 14.0 Hz, 1H), 7.05 – 6.94 (m, 2H), 6.85 (d, *J* = 14.0 Hz, 1H).

**<sup>13</sup>C NMR** (101 MHz, Chloroform-*d*)  $\delta$  159.9 (d, *J* = 250.7 Hz), 130.6 (d, *J* = 2.4 Hz), 129.7 (d, *J* = 8.5 Hz), 128.1 (d, *J* = 3.4 Hz), 124.5 (d, *J* = 3.6 Hz), 123.8 (d, *J* = 12.6 Hz), 116.2 (d, *J* = 21.9 Hz), 109.8 (d, *J* = 8.0 Hz).

**<sup>19</sup>F NMR** (376 MHz, Chloroform-*d*)  $\delta$  -116.25 - -116.19 (m, 1F).

**HRMS (ESI-TOF)** Calcd for (M+H)<sup>+</sup> C<sub>8</sub>H<sub>7</sub>BrF 200.9710. Found 200.9706.

**(*E*)-1-(2-bromovinyl)-3,5-bis(trifluoromethyl)benzene (2m)**

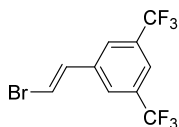

Following the GP-E, **2m** was purified by flash chromatography (PE), white solid (1.52 g, 70% yield).

**<sup>1</sup>H NMR** (400 MHz, Chloroform-*d*)  $\delta$  7.69 (s, 1H), 7.63 (s, 2H), 7.08 (d, *J* = 14.0 Hz, 1H), 6.93 (d, *J* = 14.0 Hz, 1H).

**<sup>13</sup>C NMR** (151 MHz, Chloroform-*d*)  $\delta$  138.0, 134.7, 132.5 (q, *J* = 33.4 Hz), 126.1 (d, *J* = 3.3 Hz), 123.2 (q, *J* = 272.7 Hz), 121.8 (p, *J* = 3.9 Hz), 111.3.

**<sup>19</sup>F NMR** (377 MHz, Chloroform-*d*)  $\delta$  -63.2 (s, 6F).

**HRMS (ESI-TOF)** Calcd for (M+H)<sup>+</sup> C<sub>10</sub>H<sub>6</sub>BrF<sub>6</sub> 318.9552. Found 318.9550.

**(*E*)-3-(2-bromovinyl)-9-ethyl-9H-carbazole (2p)**

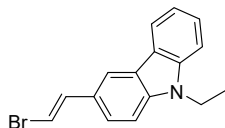

Following the GP-E, **2p** was purified by flash chromatography (PE), white solid (1.52 g, 70% yield).

**<sup>1</sup>H NMR** (400 MHz, Chloroform-*d*)  $\delta$  7.95 (d, *J* = 7.9 Hz, 1H), 7.87 (s, 1H), 7.38 – 7.34 (m, 1H), 7.30 – 7.10 (m, 5H), 6.61 (d, *J* = 13.9, 1H), 4.19 (q, *J* = 7.2 Hz, 2H), 1.28 (t, *J* = 7.2 Hz, 3H).

**<sup>13</sup>C NMR** (101 MHz, Chloroform-*d*)  $\delta$  140.5, 139.9, 138.0, 127.2, 126.1, 123.9, 123.3, 122.9, 120.6, 119.3, 118.5, 108.82, 108.80, 103.3, 37.7, 13.9.

**HRMS (ESI-TOF)** Calcd for (M+H)<sup>+</sup> C<sub>16</sub>H<sub>15</sub>BrN 300.0383. Found 300.0378.

#### IV. Evaluation of reaction parameters

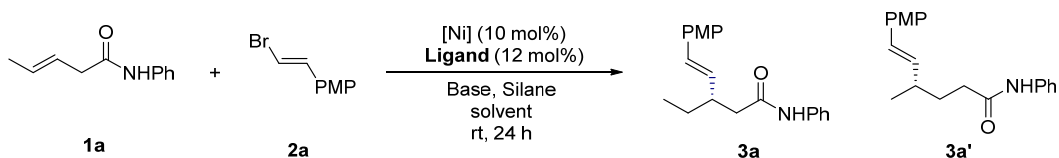

General procedure: In a nitrogen-filled glovebox, [Ni] (10 mol%) and **Ligand** (12 mol%) were dissolved in solvent in Schlenk tube with screw-cap equipped with a magnetic stirrer. The mixture was stirred at room temperature for 15 min, then alkene **1a** (0.1 mmol, 1.0 equiv), alkenyl bromides **2a**, and base were sequentially added, then silane was added dropwise. The resulting mixture was stirred at room temperature for 24 h. Then the reaction mixture was diluted with saturated NH<sub>4</sub>Cl (aqueous solution, 0.5 mL) and EtOAc (3.0 mL). Dodecane (23.0  $\mu$ L, 0.1 mmol) was added as an internal standard and a small aliquot of the organic phase was removed for GC analysis to confirm yield and regio-isomeric ratio. For the remaining mixture, the aqueous phase was extracted with EtOAc (2  $\times$  3.0 mL). The combined organic phase was dried over Na<sub>2</sub>SO<sub>4</sub>, and the volatiles were removed to afford the crude product. Then, the mixture was purified by PTLC and the enantiomeric excess was determined by HPLC analysis.



**Table S1. Effect of ligands<sup>a</sup>**

Reaction scheme showing the asymmetric allylation of **1a** with **2a** to form **3a** and **3a'**.

Reagents:  $\text{NiBr}_2 \cdot \text{DME}$  (10 mol%), **L** (12 mol%),  $\text{K}_3\text{PO}_4 \cdot \text{H}_2\text{O}$  (2.0 equiv),  $(\text{MeO})_3\text{SiH}$  (2.0 equiv), dioxane (0.1 M), rt, 24 h.

**L1**

50% yield, 79% ee  
rr = 13: 1

**L2**

26% yield, 2% ee  
rr = 6: 1

**L3**

60% yield, -70% ee  
rr = 12: 1

**L4**

76% yield, 69% ee  
rr = 13: 1

**L5**

68% yield, 63% ee  
rr = 12: 1

**L6**

14% yield, 11% ee  
rr = 6: 1

**L7**

trace

**L8**

23% yield, 11% ee  
rr = 6: 1

**L9**

36% yield, 15% ee  
rr = 6: 1

**L10**

30% yield, 2% ee  
rr = 5: 1

**L11**

21% yield, 30% ee  
rr = 4: 1

<sup>a</sup>The reaction was conducted using **1a** (0.1 mmol), **2a** (0.2 mmol), NiBr<sub>2</sub>·DME (0.01 mmol), ligand (0.012 mmol), K<sub>3</sub>PO<sub>4</sub>·H<sub>2</sub>O (0.2 mmol), (MeO)<sub>3</sub>SiH (0.2 mmol) in dioxane (1.0 mL) under N<sub>2</sub> atmosphere at room temperature for 24 h. Yields were determined by GC using *n*-dodecane as the internal standard. Enantiomeric excess (ee) was determined by chiral-stationary-phase HPLC analysis. rr = ratio of regioisomers (**3a**: **3a'**) was determined by GC.

**Table S2. Effect of solvent**

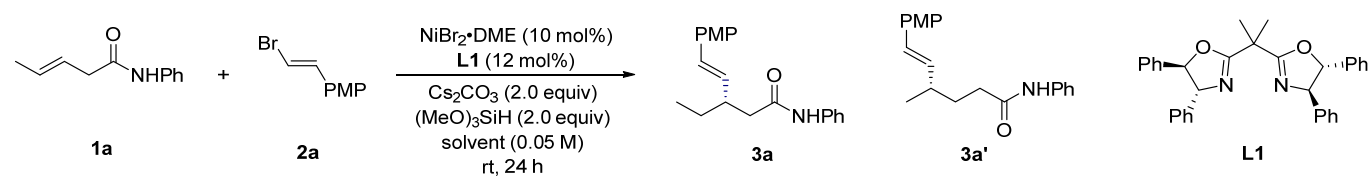

| entry | solvent           | yield of <b>3a</b> (ee) <sup>a</sup> | rr <sup>b</sup> |
|-------|-------------------|--------------------------------------|-----------------|
| 1     | THF               | 40% yield (76% ee)                   | 7: 1            |
| 2     | 2-Me-THF          | 60% yield (76% ee)                   | 7: 1            |
| 3     | THP               | 63% yield (69% ee)                   | 7: 1            |
| 4     | 1,3-dioxolane     | 36% yield (80% ee)                   | 8: 1            |
| 5     | Et <sub>2</sub> O | 32% yield (60% ee)                   | 5: 1            |
| 6     | DME               | 45% yield (81% ee)                   | 7: 1            |
| 7     | Diglyme           | 47% yield (80% ee)                   | 7: 1            |
| 8     | PhCF <sub>3</sub> | trace                                | --              |
| 9     | DMA               | trace                                | --              |
| 10    | DMSO              | trace                                | --              |
| 11    | Hexane            | trace                                | --              |

<sup>a</sup>The reaction was conducted using **1a** (0.1 mmol), **2a** (0.2 mmol),  $\text{NiBr}_2\cdot\text{DME}$  (10 mol%), **L1** (12 mol%),  $\text{Cs}_2\text{CO}_3$  (0.2 mmol),  $(\text{MeO})_3\text{SiH}$  (0.2 mmol) in dioxane (2.0 mL) under  $\text{N}_2$  atmosphere at room temperature for 24 h. Yields were determined by GC using *n*-dodecane as the internal standard. Enantiomeric excess (ee) was determined by chiral-stationary-phase HPLC analysis. <sup>b</sup>rr = ratio of regioisomers (**3a**: **3a'**) was determined by GC.

**Table S3. Effect of co-solvent**

| entry | co-solvent                                         | yield of <b>3a</b> (ee) <sup>a</sup> | rr <sup>b</sup> |
|-------|----------------------------------------------------|--------------------------------------|-----------------|
| 1     | dioxane: THF= 3: 1                                 | 45% yield (82% ee)                   | 10: 1           |
| 2     | dioxane: 2-Me-THF= 3: 1                            | 75% yield (83% ee)                   | 11: 1           |
| 3     | dioxane: THP= 3: 1                                 | 72% yield (82% ee)                   | 10: 1           |
| 4     | dioxane: Et <sub>2</sub> O= 3: 1                   | 52% yield (82% ee)                   | 11: 1           |
| 5     | dioxane: 1,3-dioxolane= 3: 1                       | 72% yield (82% ee)                   | 11: 1           |
| 6     | <b>dioxane: DME= 3: 1</b>                          | <b>71% yield (85% ee)</b>            | <b>10: 1</b>    |
| 7     | dioxane: diglyme= 3: 1                             | 76% yield (83% ee)                   | 10: 1           |
| 8     | dioxane: triethyleneglycol dimethyl ether= 3: 1    | 67% yield (82% ee)                   | 9: 1            |
| 9     | dioxane: isopropyl ether= 3: 1                     | 58% yield (84% ee)                   | 11: 1           |
| 10    | dioxane: ethylene glycol diethyl ether= 3: 1       | 73% yield (82% ee)                   | 10: 1           |
| 11    | dioxane: tetraethylene glycol dimethyl ether= 3: 1 | 43% yield (79% ee)                   | 12: 1           |
| 12    | dioxane: PhCF <sub>3</sub> = 3: 1                  | 55% yield (82% ee)                   | 12: 1           |
| 13    | dioxane: DMA= 3: 1                                 | 32% yield (74% ee)                   | 8: 1            |
| 14    | dioxane: toluene= 3: 1                             | 40% yield (82% ee)                   | 12: 1           |
| 15    | dioxane: ACN = 3: 1                                | 10% yield (33% ee)                   | 7: 1            |
| 16    | dioxane: <i>t</i> -BuOH= 3: 1                      | 73% yield (79% ee)                   | 11: 1           |
| 17    | dioxane: DCE= 3: 1                                 | 31% yield (64% ee)                   | 10: 1           |
| 18    | dioxane: DCM= 3: 1                                 | trace                                | --              |
| 19    | dioxane: hexane= 3: 1                              | 50% yield (85% ee)                   | 11: 1           |

<sup>a</sup>The reaction was conducted using **1a** (0.1 mmol), **2a** (0.2 mmol), NiBr<sub>2</sub>·DME (0.01 mmol), **L1** (0.012 mmol), Cs<sub>2</sub>CO<sub>3</sub> (0.2 mmol), (MeO)<sub>3</sub>SiH (0.2 mmol) in co-solvent (3: 1, 2.0 mL) under N<sub>2</sub> atmosphere at room temperature for 24 h. Yields were determined by GC using *n*-dodecane as the internal standard. Enantiomeric excess (ee) was determined by chiral-stationary-phase HPLC analysis. <sup>b</sup>rr = ratio of regioisomers (**3a**: **3a'**) was determined by GC.

**Table S4. Effect of co-solvent ratio**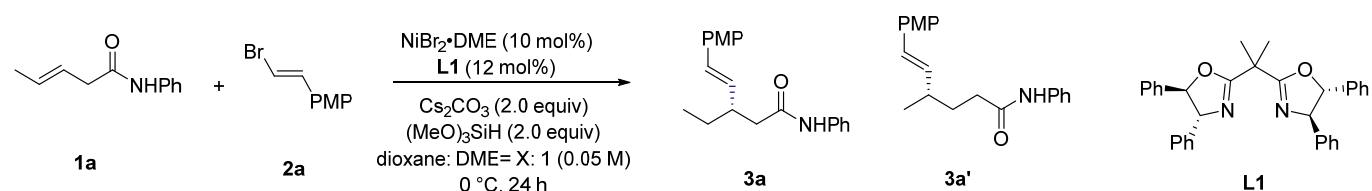

| Entry | ratio of co-solvent       | yield of <b>3a</b> (ee) <sup>a</sup> | rr <sup>b</sup> |
|-------|---------------------------|--------------------------------------|-----------------|
| 1     | dioxane: DME= 1: 1        | 45% yield (88% ee)                   | 10: 1           |
| 2     | <b>dioxane: DME= 3: 1</b> | <b>55% yield (90% ee)</b>            | <b>12: 1</b>    |
| 3     | dioxane: DME= 6: 1        | 36% yield (90% ee)                   | 12: 1           |
| 4     | dioxane: DME= 9: 1        | 21% yield (84% ee)                   | 16: 1           |

<sup>a</sup>The reaction was conducted using **1a** (0.1 mmol), **2a** (0.2 mmol),  $\text{NiBr}_2 \cdot \text{DME}$  (0.01 mmol), **L1** (0.012 mmol),  $\text{Cs}_2\text{CO}_3$  (0.2 mmol),  $(\text{MeO})_3\text{SiH}$  (0.2 mmol) in dioxane: DME (X: 1, 2.0 mL) under  $\text{N}_2$  atmosphere at 0 °C for 24 h. Yields were determined by GC using *n*-dodecane as the internal standard. Enantiomeric excess (ee) was determined by chiral-stationary-phase HPLC analysis. <sup>b</sup>rr = ratio of regioisomers (**3a**: **3a'**) was determined by GC.

**Table S5. Effect of base**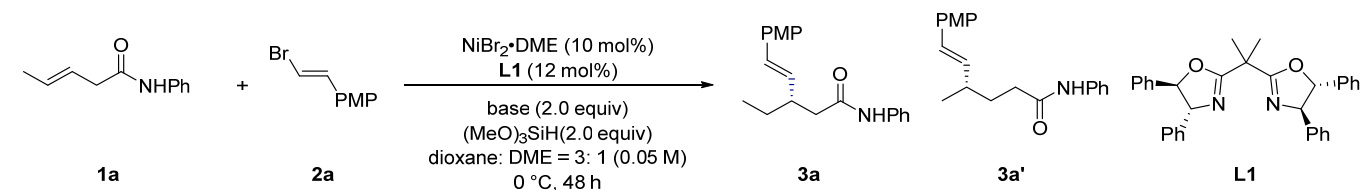

| entry | base                                                               | yield of <b>3a</b> (ee) <sup>a</sup> | rr <sup>b</sup> |
|-------|--------------------------------------------------------------------|--------------------------------------|-----------------|
| 1     | $\text{Na}_2\text{CO}_3$                                           | 71% yield (85% ee)                   | 10: 1           |
| 2     | $\text{NaHCO}_3$                                                   | 22% yield (84% ee)                   | 9: 1            |
| 3     | $\text{K}_2\text{CO}_3$                                            | 24% yield (86% ee)                   | 12: 1           |
| 4     | $\text{KHCO}_3$                                                    | 30% yield (86% ee)                   | 11: 1           |
| 5     | <b><math>\text{K}_3\text{PO}_4 \cdot \text{H}_2\text{O}</math></b> | <b>84% yield (91% ee)</b>            | <b>10: 1</b>    |

<sup>a</sup>The reaction was conducted using **1a** (0.1 mmol), **2a** (0.2 mmol),  $\text{NiBr}_2 \cdot \text{DME}$  (0.01 mmol), **L1** (0.012 mmol), base (0.2 mmol),  $(\text{MeO})_3\text{SiH}$  (0.2 mmol) in dioxane: DME (3: 1, 2.0 mL) under  $\text{N}_2$  atmosphere at 0 °C for 48 h. Yields were determined by GC using *n*-dodecane as the internal standard. Enantiomeric excess (ee) was determined by chiral-stationary-phase HPLC analysis. <sup>b</sup>rr = ratio of regioisomers (**3a**: **3a'**) was determined by GC.

**Table S6. Effect of concentration**

| entry | concentration | yield of <b>3a</b> (ee) <sup>a</sup> | rr <sup>b</sup> |
|-------|---------------|--------------------------------------|-----------------|
| 1     | 0.1 M         | 80% yield (88% ee)                   | 9: 1            |
| 2     | 0.067 M       | 80% yield (90% ee)                   | 11: 1           |
| 3     | <b>0.05 M</b> | <b>84% yield (91% ee)</b>            | <b>10: 1</b>    |
| 4     | 0.04 M        | 67% yield (90% ee)                   | 12: 1           |
| 5     | 0.033 M       | 60% yield (90% ee)                   | 13: 1           |

<sup>a</sup>The reaction was conducted using **1a** (0.1 mmol), **2a** (0.2 mmol), NiBr<sub>2</sub>·DME (0.01 mmol), **L1** (0.012 mmol), K<sub>3</sub>PO<sub>4</sub>·H<sub>2</sub>O (0.2 mmol), (MeO)<sub>3</sub>SiH (0.2 mmol) in dioxane: DME (3: 1, X M) under N<sub>2</sub> atmosphere at 0 °C for 48 h. Yields were determined by GC using *n*-dodecane as the internal standard. Enantiomeric excess (ee) was determined by chiral-stationary-phase HPLC analysis. <sup>b</sup>rr = ratio of regioisomers (**3a**: **3a'**) was determined by GC.

**Table S7. Effect of precatalyst**

| entry | precatalyst                | yield of <b>3a</b> (ee) <sup>a</sup> | rr <sup>b</sup> |
|-------|----------------------------|--------------------------------------|-----------------|
| 1     | NiCl <sub>2</sub> ·glyme   | 84% yield (91% ee)                   | 10: 1           |
| 2     | NiBr <sub>2</sub>          | trace                                | --              |
| 3     | NiBr <sub>2</sub> ·diglyme | 79% yield (90% ee)                   | 10: 1           |
| 4     | Ni(OTf) <sub>2</sub>       | n.d.                                 | --              |
| 5     | Ni(OAc) <sub>2</sub>       | n.d.                                 | --              |
| 6     | <b>Ni(COD)<sub>2</sub></b> | <b>84% yield (92% ee)</b>            | <b>10: 1</b>    |

<sup>a</sup>The reaction was conducted using **1a** (0.1 mmol), **2a** (0.25 mmol), [Ni] (0.01 mmol), **L1** (0.012 mmol), K<sub>3</sub>PO<sub>4</sub>·H<sub>2</sub>O (0.2 mmol), (MeO)<sub>3</sub>SiH (0.3 mmol) in dioxane: DME (3: 1, 2.0 mL) under N<sub>2</sub> atmosphere at 0 °C for 48 h. Yields were determined by GC using *n*-dodecane as the internal standard. Enantiomeric excess (ee) was determined by chiral-stationary-phase HPLC analysis. <sup>b</sup>rr = ratio of regioisomers (**3a**: **3a'**) was determined by GC.

## V. General procedures for enantioselective hydroalkenylations of alkenes

**Method A:** In a nitrogen-filled glovebox, Ni(COD)<sub>2</sub> (5.5 mg, 0.02 mmol, 10 mol%) and **L1** (12.0 mg, 0.024 mmol, 12 mol%) were dissolved in co-solvent (dioxane: DME = 3:1, 4.0 mL) in a 10.0 mL Schlenk tube with screw-cap equipped with a magnetic stirrer. The mixture was stirred at room temperature for 15 min, then alkene (0.2 mmol, 1.0 equiv), alkenyl bromides (0.5 mmol, 2.5 equiv), K<sub>3</sub>PO<sub>4</sub>•H<sub>2</sub>O (92.0 mg, 0.4 mmol, 2.0 equiv) were sequentially added. The mixture was cooled to 0 °C before (MeO)<sub>3</sub>SiH (73.2 mg, 0.6 mmol, 3.0 equiv) was added dropwise and stirred at 0 °C for 48 h. The mixture was quenched with H<sub>2</sub>O (2.0 mL) and extracted with ethyl acetate (20.0 mL), then filtered through a pad of silica gel. The organic phase was dried over Na<sub>2</sub>SO<sub>4</sub>, filtered, concentrated under reduced pressure, ratio of main product and other isomers was determined by GC. The crude mixture was purified by flash column chromatography on silica gel to obtain the desired product.

**Method B:** In a nitrogen-filled glovebox, NiBr<sub>2</sub>•DME (6.2 mg, 0.02 mmol, 10 mol%) and **L1** (12.0 mg, 0.024 mmol, 12 mol%) were dissolved in dioxane (4.0 mL) in Schlenk tube with screw-cap equipped with a magnetic stirrer. The mixture was stirred at room temperature for 15 min, then alkene (0.2 mmol, 1.0 equiv), alkenyl bromides (0.5 mmol, 2.5 equiv), Cs<sub>2</sub>CO<sub>3</sub> (130.0 mg, 0.4 mmol, 2.0 equiv), NaI (30.0 mg, 0.2 mmol, 1.0 equiv) were sequentially added, then HBpin (90.0 mg, 0.7 mmol, 3.5 equiv) was added dropwise. The resulting mixture was stirred at room temperature for 48 h. The mixture was quenched H<sub>2</sub>O (2.0 mL) and extracted with ethyl acetate (20.0 mL), then filtered through a pad of silica gel. The organic phase was dried over Na<sub>2</sub>SO<sub>4</sub>, filtered, concentrated under reduced pressure, ratio of main product and other isomers was determined by GC. The crude mixture was purified by flash column chromatography on silica gel to obtain the desired product.

**Method C:** In a nitrogen-filled glovebox, NiBr<sub>2</sub>•DME (6.2 mg, 0.02 mmol, 10 mol%) and **L1** (12.0 mg, 0.024 mmol, 12 mol%) were dissolved in dioxane (4.0 mL) in Schlenk tube with screw-cap equipped with a magnetic stirrer. The mixture was stirred at room temperature for 15 min, then alkene (0.2 mmol, 1.0 equiv), alkenyl bromides (0.5 mmol, 2.5 equiv), NaI (6.0 mg, 0.04 mmol, 0.2 equiv), K<sub>3</sub>PO<sub>4</sub>•H<sub>2</sub>O (92.0 mg, 0.4 mmol, 2.0 equiv) were sequentially added, then (MeO)<sub>3</sub>SiH (73.2 mg, 0.6 mmol, 3.0 equiv) was added dropwise. The resulting mixture was stirred at room temperature for 24 h. The mixture was quenched with H<sub>2</sub>O (2.0 mL) and extracted with ethyl acetate (20.0 mL), then filtered through a pad of silica gel. The organic phase was dried over Na<sub>2</sub>SO<sub>4</sub>, filtered, concentrated under reduced pressure, ratio of main product and other isomers was determined by GC. The crude mixture was purified by flash column chromatography on silica gel to obtain the desired product.

**Method D:** In a nitrogen-filled glovebox, NiBr<sub>2</sub>•DME (6.2 mg, 0.02 mmol, 10 mol%) and **L1** (12.0 mg, 0.024 mmol, 12 mol%) were dissolved in dioxane (4.0 mL) in Schlenk tube with screw-cap equipped with a magnetic stirrer. The mixture was stirred at room temperature for 10 min, then alkene (0.4 mmol, 2.0 equiv), alkenyl bromides (0.2 mmol, 1.0 equiv), NaI (15.0 mg, 0.1 mmol, 0.5 equiv), KCl (7.5 mg, 0.1

mmol, 0.5 equiv), CsF (60.8 mg, 0.4 mmol, 2.0 equiv) were sequentially added, then HBpin (90.0 mg, 0.7 mmol, 3.5 equiv) was added dropwise. The resulting mixture was stirred at room temperature for 24 h. The mixture was quenched with H<sub>2</sub>O (2.0 mL) and extracted with ethyl acetate (20.0 mL), then filtered through a pad of silica gel. The organic phase was dried over Na<sub>2</sub>SO<sub>4</sub>, filtered, concentrated under reduced pressure, ratio of main product and other isomers was determined by GC. The crude mixture was purified by flash column chromatography on silica gel to obtain the desired product.

## VI. Characterization of products

### (*S,E*)-3-Ethyl-5-(4-methoxyphenyl)-*N*-phenylpent-4-enamide (**3a**)

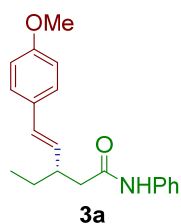

Following **method A**, **3a** was obtained as white solid after flash chromatography (PE: EtOAc = 6: 1) (48.8 mg, 79% yield, 92% ee). rr = 10: 1.

<sup>1</sup>H NMR (400 MHz, Chloroform-*d*) δ 7.49 – 7.35 (m, 2H), 7.35 – 7.19 (m, 5H), 7.08 – 7.04 (m, 1H), 6.89 – 6.69 (m, 2H), 6.42 (d, *J* = 15.8 Hz, 1H), 5.91 (dd, *J* = 15.8, 8.7 Hz, 1H), 3.78 (s, 3H), 2.79 – 2.57 (m, 1H), 2.48 (dd, *J* = 14.4, 5.7 Hz, 1H), 2.38 (dd, *J* = 14.4, 8.3 Hz, 1H), 1.65 – 1.55 (m, 1H), 1.49 – 1.38 (m, 1H), 0.93 (t, *J* = 7.4 Hz, 3H).

<sup>13</sup>C NMR (101 MHz, Chloroform-*d*) δ 170.3, 159.1, 137.9, 130.8, 130.7, 130.1, 129.1, 127.4, 124.4, 120.1, 114.1, 55.4, 43.9, 42.1, 28.2, 11.9.

**HRMS (ESI-TOF)** Calcd for C<sub>20</sub>H<sub>24</sub>NO<sub>2</sub> (M+H)<sup>+</sup> 310.1802. Found 310.1799.

**HPLC** (AD-H, 0.46\*25 cm, 5 μm, hexane/isopropanol = 90/10, flow rate = 1 mL/min, detection at 254 nm) retention time = 14.8 min (major) and 17.7min (minor).

### (*S,E*)-*N*-(4-acetylphenyl)-3-ethyl-5-(4-methoxyphenyl)pent-4-enamide (**3b**)

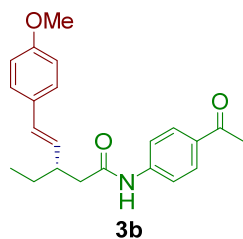

Following **method A**, **3b** was obtained as white solid after flash chromatography (PE: EtOAc = 3: 1) (49.8 mg, 71% yield, 90% ee). rr = 12: 1.

<sup>1</sup>H NMR (400 MHz, Chloroform-*d*) δ 7.91 (d, *J* = 8.7 Hz, 2H), 7.64 – 7.48 (m, 3H), 7.31 – 7.29 (m, 2H), 6.86 (d, *J* = 8.7 Hz, 2H), 6.47 (d, *J* = 15.8 Hz, 1H), 5.94 (dd, *J* = 15.8, 8.7 Hz, 1H), 3.82 (s, 3H), 2.69 – 2.61 (m, 1H), 2.61 – 2.52 (m, 4H), 2.46 (dd, *J* = 14.4, 8.5 Hz, 1H), 1.68 – 1.59 (m, 1H), 1.54 – 1.44 (m, 1H), 0.97 (t, *J* = 7.4 Hz, 3H).

$^{13}\text{C}$  NMR (151 MHz, Chloroform-*d*)  $\delta$  197.0, 170.6, 159.2, 142.3, 133.0, 131.1, 130.4, 129.8, 128.9, 127.4, 119.0, 114.2, 55.4, 44.0, 42.0, 28.2, 26.6, 11.9.

**HRMS (ESI-TOF)** Calcd for  $\text{C}_{22}\text{H}_{26}\text{NO}_3$  ( $\text{M}+\text{H}$ ) $^+$  352.1907. Found 352.1908.

**HPLC** (IA, 0.46\*25 cm, 5  $\mu\text{m}$ , hexane/isopropanol = 90/10, flow rate = 1 mL/min, detection at 254 nm) retention time = 17.6 min (major) and 18.5 min (minor).

**(*S,E*)-3-Ethyl-5-(4-methoxyphenyl)-*N*-(4-(trifluoromethyl)phenyl)pent-4-enamide (3c)**

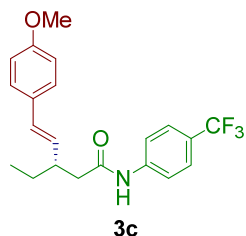

Following **method A**, **3c** was obtained as white solid after flash chromatography (PE: EtOAc = 8: 1) (56.5 mg, 75% yield, 91% ee). rr = 10: 1.

$^1\text{H}$  NMR (400 MHz, Chloroform-*d*)  $\delta$  7.54 (s, 1H), 7.52 – 7.42 (m, 4H), 7.18 (d,  $J$  = 8.8 Hz, 2H), 6.75 (d,  $J$  = 8.8 Hz, 2H), 6.35 (d,  $J$  = 15.8 Hz, 1H), 5.82 (dd,  $J$  = 15.8, 8.7 Hz, 1H), 3.71 (s, 3H), 2.62 – 2.54 (m, 1H), 2.44 (dd,  $J$  = 14.4, 5.5 Hz, 1H), 2.33 (dd,  $J$  = 14.4, 8.5 Hz, 1H), 1.57 – 1.47 (m, 1H), 1.43 – 1.32 (m, 1H), 0.86 (t,  $J$  = 7.4 Hz, 3H).

$^{13}\text{C}$  NMR (101 MHz, Chloroform-*d*)  $\delta$  170.7, 159.2, 141.0, 132.5, 131.1, 130.4, 129.9, 127.4, 126.3 (q,  $J$  = 3.9 Hz), 124.2 (q,  $J$  = 272.7 Hz), 119.6, 114.1, 55.4, 43.9, 42.1, 28.2, 11.8.

$^{19}\text{F}$  NMR (376 MHz, Chloroform-*d*)  $\delta$  -62.1 (s, 3F).

**HRMS (ESI-TOF)** Calcd for  $\text{C}_{21}\text{H}_{23}\text{F}_3\text{NO}_2$  ( $\text{M}+\text{H}$ ) $^+$  378.1676. Found 378.1677.

**HPLC** (OD-H, 0.46\*25 cm, 5  $\mu\text{m}$ , hexane/isopropanol = 90/10, flow rate = 1 mL/min, detection at 254 nm) retention time = 8.9 min (major) and 10.3 min (minor).

**(*S,E*)-3-Ethyl-*N*,5-bis(4-methoxyphenyl)pent-4-enamide (3d)**

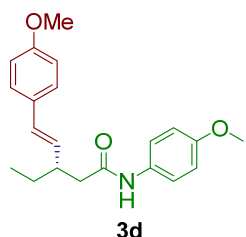

Following **method A**, **3d** was obtained as white solid after flash chromatography (PE: EtOAc = 3: 1) (49.5 mg, 73% yield, 90% ee). rr = 10: 1.

$^1\text{H}$  NMR (400 MHz, Chloroform-*d*)  $\delta$  7.38 (s, 1H), 7.26 – 7.24 (m, 2H), 7.20 – 7.18 (m, 2H), 6.80 – 6.67 (m, 4H), 6.35 (d,  $J$  = 15.8 Hz, 1H), 5.83 (dd,  $J$  = 15.8, 8.8 Hz, 1H), 3.72 (s, 3H), 3.68 (s, 3H), 2.62 – 2.53 (m, 1H), 2.39 (dd,  $J$  = 14.2, 5.8 Hz, 1H), 2.29 (dd,  $J$  = 14.2, 8.4 Hz, 1H), 1.57 – 1.47 (m, 1H), 1.40 – 1.29 (m, 1H), 0.86 (t,  $J$  = 7.4 Hz, 3H).

$^{13}\text{C}$  NMR (101 MHz, Chloroform-*d*)  $\delta$  170.3, 159.1, 156.5, 131.0, 130.8, 130.7, 130.2, 127.4, 122.1, 114.2, 114.1, 55.6, 55.4, 43.7, 42.1, 28.2, 11.9.



**HRMS (ESI-TOF)** Calcd for C<sub>21</sub>H<sub>26</sub>NO<sub>3</sub> (M+H)<sup>+</sup> 340.1907. Found 340.1907.

**HPLC** (IA, 0.46\*25 cm, 5 μm, hexane/isopropanol = 85/15, flow rate = 1 mL/min, detection at 254 nm) retention time = 22.2 min (major) and 25.0 min (minor).

**(*S,E*)-3-Ethyl-5-(4-methoxyphenyl)-*N*-(thiophen-3-yl)pent-4-enamide (3e)**

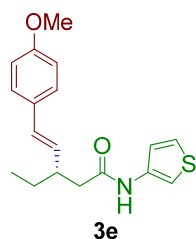

Following **method A**, **3e** was obtained as white solid after flash chromatography (PE: EtOAc = 6: 1) (44.1 mg, 70% yield, 92% ee). rr = 11: 1.

**<sup>1</sup>H NMR** (400 MHz, Chloroform-*d*) δ 7.84 (s, 1H), 7.44 – 7.43 (m, 1H), 7.19 – 7.17 (m, 2H), 7.09 – 7.07 (m, 1H), 6.85 – 6.83 (m, 1H), 6.76 – 6.73 (m, 2H), 6.32 (d, *J* = 15.8 Hz, 1H), 5.81 (dd, *J* = 15.8, 8.7 Hz, 1H), 3.71 (s, 3H), 2.62 – 2.53 (m, 1H), 2.38 (dd, *J* = 14.4, 5.9 Hz, 1H), 2.30 (dd, *J* = 14.4, 8.2 Hz, 1H), 1.54 – 1.48 (m, 1H), 1.38 – 1.30 (m, 1H), 0.84 (t, *J* = 7.4 Hz, 3H).

**<sup>13</sup>C NMR** (101 MHz, Chloroform-*d*) δ 169.8, 159.1, 135.7, 130.7, 130.6, 130.1, 127.4, 124.5, 121.2, 114.1, 110.4, 55.4, 43.2, 42.0, 28.1, 11.8.

**HRMS (ESI-TOF)** Calcd for C<sub>18</sub>H<sub>22</sub>NO<sub>2</sub>S (M+H)<sup>+</sup> 316.1366. Found 316.1366.

**HPLC** (IA, 0.46\*25 cm, 5 μm, hexane/isopropanol = 90/10, flow rate = 1 mL/min, detection at 254 nm) retention time = 13.2 min (major) and 14.4 min (minor).

**(*S,E*)-*N*-(4-methoxyphenyl)-3-(4-methoxystyryl)hexanamide (3f)**

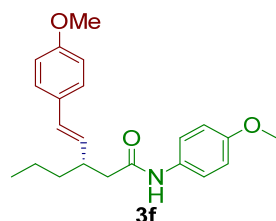

Following **method A**, **3f** was obtained as white solid after flash chromatography (PE: EtOAc = 3: 1) (38.1 mg, 54% yield, 88% ee). rr = 9: 1.

**<sup>1</sup>H NMR** (600 MHz, Chloroform-*d*) δ 7.45 (s, 1H), 7.38 – 7.30 (m, 2H), 7.26 (d, *J* = 8.8 Hz, 2H), 6.87 – 6.76 (m, 4H), 6.40 (d, *J* = 15.8 Hz, 1H), 5.90 (dd, *J* = 15.8, 8.7 Hz, 1H), 3.79 (s, 3H), 3.75 (s, 3H), 2.78 – 2.72 (m, 1H), 2.44 (dd, *J* = 14.2, 5.8 Hz, 1H), 2.35 (dd, *J* = 14.2, 8.3 Hz, 1H), 1.56 – 1.47 (m, 1H), 1.43 – 1.37 (m, 2H), 1.34 – 1.32 (m, 1H), 0.90 (t, *J* = 7.1 Hz, 3H).

**<sup>13</sup>C NMR** (151 MHz, Chloroform-*d*) δ 170.3, 159.0, 156.5, 131.07, 131.05, 130.4, 130.2, 127.4, 122.2, 114.2, 114.1, 55.6, 55.4, 44.0, 40.3, 37.5, 20.5, 14.1.

**HRMS (ESI-TOF)** Calcd for C<sub>22</sub>H<sub>28</sub>NO<sub>3</sub> (M+H)<sup>+</sup> 354.2064. Found 354.2066.

**HPLC** (IA, 0.46\*25 cm, 5 μm, hexane/isopropanol = 90/10, flow rate = 1 mL/min, detection at 254 nm) retention time = 22.2 min (major) and 24.3 min (minor).

### Ethyl (*S,E*)-4-(3-(4-methoxystyryl)octanamido)benzoate (**3g**)

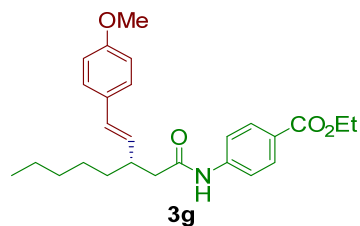

Following **method A**, **3g** was obtained as white solid after flash chromatography (PE: EtOAc = 3: 1) (66.0 mg, 78% yield, 88% ee). rr = 10: 1.

**<sup>1</sup>H NMR** (400 MHz, Chloroform-*d*)  $\delta$  7.88 – 7.86 (m, 2H), 7.80 (s, 1H), 7.47 – 7.45 (m, 2H), 7.17 – 7.15 (m, 2H), 6.75 – 6.73 (m, 2H), 6.32 (d, *J* = 15.8 Hz, 1H), 5.81 (dd, *J* = 15.8, 8.8 Hz, 1H), 4.25 (q, *J* = 7.1 Hz, 2H), 3.70 (s, 3H), 2.70 – 2.61 (m, 1H), 2.42 (dd, *J* = 14.4, 5.7 Hz, 1H), 2.33 (dd, *J* = 14.4, 8.3 Hz, 1H), 1.48 – 1.38 (m, 1H), 1.36 – 1.26 (m, 5H), 1.22 – 1.16 (m, 5H), 0.77 (t, *J* = 6.6 Hz, 3H).

**<sup>13</sup>C NMR** (101 MHz, Chloroform-*d*)  $\delta$  170.8, 166.3, 159.1, 142.2, 130.8, 130.6, 130.0, 127.4, 125.8, 119.0, 114.1, 61.0, 55.4, 44.2, 40.4, 35.3, 31.9, 27.0, 22.7, 14.4, 14.2.

**HRMS (ESI-TOF)** Calcd for C<sub>26</sub>H<sub>34</sub>NO<sub>4</sub> (M+H)<sup>+</sup> 424.2483. Found 424.2485.

**HPLC** (AD-H, 0.46\*25 cm, 5  $\mu$ m, hexane/isopropanol = 90/10, flow rate = 1 mL/min, detection at 254 nm) retention time = 18.6 min (minor) and 21.5 min (major).

### (*S,E*)-3-(4-Methoxystyryl)-*N*-phenylhexanamide (**3h**)

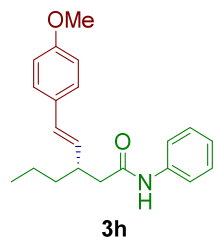

Following **method A**, **3h** was obtained as white solid after flash chromatography (PE: EtOAc = 6: 1) (42.0 mg, 65% yield, 71% ee). rr = 9: 1.

Following **method B**, **3h** was obtained as white solid after flash chromatography (PE: EtOAc = 6: 1) (35.5 mg, 55% yield, 88% ee). rr = 12: 1.

**<sup>1</sup>H NMR** (400 MHz, Chloroform-*d*)  $\delta$  7.66 (s, 1H), 7.50 – 7.48 (m, 2H), 7.34 – 7.24 (m, 4H), 7.12 – 7.08 (m, 1H), 6.87 – 6.85 (m, 2H), 6.44 (d, *J* = 15.8 Hz, 1H), 5.93 (dd, *J* = 15.8, 8.8 Hz, 1H), 3.82 (s, 3H), 2.87 – 2.73 (m, 1H), 2.50 (dd, *J* = 14.4, 5.9 Hz, 1H), 2.41 (dd, *J* = 14.4, 8.1 Hz, 1H), 1.61 – 1.50 (m, 1H), 1.50 – 1.33 (m, 3H), 0.93 (t, *J* = 7.0 Hz, 3H).

**<sup>13</sup>C NMR** (101 MHz, Chloroform-*d*)  $\delta$  170.3, 159.1, 137.9, 131.0, 130.6, 130.1, 129.1, 127.4, 124.4, 120.1, 114.1, 55.4, 44.3, 40.2, 37.5, 20.5, 14.2.

**HRMS (ESI-TOF)** Calcd for C<sub>21</sub>H<sub>26</sub>NO<sub>2</sub> (M+H)<sup>+</sup> 324.1958. Found 324.1957.

**HPLC** (AD-H, 0.46\*25 cm, 5  $\mu$ m, hexane/isopropanol = 90/10, flow rate = 1 mL/min, detection at 254 nm) retention time = 15.9 min (major) and 17.6 min (minor).

### (*S,E*)-5-(4-Methoxyphenyl)-3-phenethyl-*N*-phenylpent-4-enamide (**3i**)

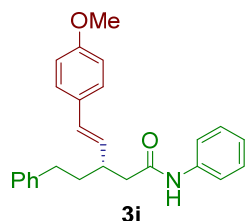

Following **method A**, **3i** was obtained as white solid after flash chromatography (PE: EtOAc = 6: 1) (60.0 mg, 78% yield, 91% ee). rr = 9: 1.

**<sup>1</sup>H NMR** (400 MHz, Chloroform-*d*)  $\delta$  7.44 – 7.42 (m, 2H), 7.36 – 7.27 (m, 7H), 7.20 – 7.17 (m, 3H), 7.10 – 7.07 (m, 1H), 6.87 – 6.85 (m, 2H), 6.47 (d, *J* = 15.8 Hz, 1H), 5.97 (dd, *J* = 15.8, 8.8 Hz, 1H), 3.82 (s, 3H), 2.86 – 2.77 (m, 1H), 2.77 – 2.69 (m, 1H), 2.68 – 2.57 (m, 1H), 2.52 (dd, *J* = 14.4, 5.9 Hz, 1H), 2.44 (dd, *J* = 14.4, 8.1 Hz, 1H), 1.97 – 1.88 (m, 1H), 1.79 – 1.73 (m, 1H).

**<sup>13</sup>C NMR** (101 MHz, Chloroform-*d*)  $\delta$  170.0, 159.2, 142.1, 137.8, 131.2, 130.4, 130.0, 129.1, 128.56, 128.51, 127.5, 126.0, 124.4, 120.1, 114.1, 55.4, 44.2, 40.2, 36.9, 33.7.

**HRMS (ESI-TOF)** Calcd for C<sub>26</sub>H<sub>28</sub>NO<sub>2</sub> (M+H)<sup>+</sup> 386.2115. Found 386.2117.

**HPLC** (AD-H, 0.46\*25 cm, 5  $\mu$ m, hexane/isopropanol = 90/10, flow rate = 1 mL/min, detection at 254 nm) retention time = 30.1 min (minor) and 35.7 min (major).

**Methyl (S,E)-8-(4-methoxyphenyl)-6-(2-oxo-2-(phenylamino)ethyl)oct-7-enoate (3j)**

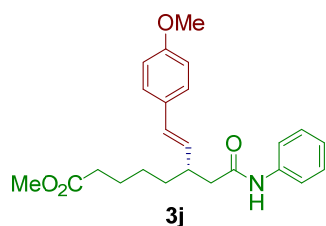

Following **method A**, **3j** was obtained as white solid after flash chromatography (PE: EtOAc = 3: 1) (58.5 mg, 74% yield, 90% ee). rr = 9: 1.

**<sup>1</sup>H NMR** (400 MHz, Chloroform-*d*)  $\delta$  7.54 (s, 1H), 7.43 (d, *J* = 7.8 Hz, 2H), 7.26 – 7.22 (m, 4H), 7.06 – 7.02 (m, 1H), 6.80 (d, *J* = 8.8 Hz, 2H), 6.38 (d, *J* = 15.8 Hz, 1H), 5.86 (dd, *J* = 15.8, 8.8 Hz, 1H), 3.76 (s, 3H), 3.61 (s, 3H), 2.77 – 2.68 (m, 1H), 2.43 (dd, *J* = 14.4, 6.0 Hz, 1H), 2.35 (dd, *J* = 14.4, 8.0 Hz, 1H), 2.26 (t, *J* = 7.4 Hz, 2H), 1.69 – 1.47 (m, 3H), 1.47 – 1.26 (m, 3H).

**<sup>13</sup>C NMR** (101 MHz, Chloroform-*d*)  $\delta$  174.3, 170.3, 159.1, 137.9, 130.64, 130.59, 130.0, 129.0, 127.4, 124.3, 120.1, 114.1, 55.4, 51.6, 44.0, 40.2, 34.7, 34.0, 26.8, 24.9.

**HRMS (ESI-TOF)** Calcd for C<sub>24</sub>H<sub>30</sub>NO<sub>4</sub> (M+H)<sup>+</sup> 396.2170. Found 396.2172.

**HPLC** (IA, 0.46\*25 cm, 5  $\mu$ m, hexane/isopropanol = 90/10, flow rate = 1 mL/min, detection at 254 nm) retention time = 21.6 min (major) and 23.7 min (minor).

**(S,E)-5-(4-Methoxyphenyl)-3-methyl-N-phenylpent-4-enamide (3k)**

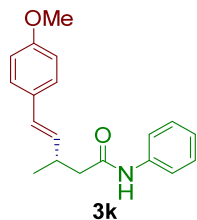

Following **method A**, **3k** was obtained as white solid after flash chromatography (PE: EtOAc = 8: 1) (44.2 mg, 75% yield, 88% ee). rr = 11: 1.

**<sup>1</sup>H NMR** (600 MHz, Chloroform-*d*)  $\delta$  7.42 (s, 1H), 7.40 – 7.38 (m, 2H), 7.22 – 7.16 (m, 4H), 7.02 – 6.98 (m, 1H), 6.76 – 6.74 (m, 2H), 6.32 (d, *J* = 15.8 Hz, 1H), 5.97 (dd, *J* = 15.8, 7.5 Hz, 1H), 3.71 (s, 3H), 2.89 – 2.82 (m, 1H), 2.37 (dd, *J* = 14.4, 7.3 Hz, 1H), 2.29 (dd, *J* = 14.3, 6.9 Hz, 1H), 1.11 (d, *J* = 6.7 Hz, 3H).

**<sup>13</sup>C NMR** (151 MHz, Chloroform-*d*)  $\delta$  170.3, 159.1, 137.9, 132.3, 130.1, 129.1, 128.8, 127.4, 124.4, 120.1, 114.1, 55.4, 45.3, 34.5, 20.4.

**HRMS (ESI-TOF)** Calcd for C<sub>19</sub>H<sub>22</sub>NO<sub>2</sub> (M+H)<sup>+</sup> 296.1645. Found 296.1646.

**HPLC** (OD-H, 0.46\*25 cm, 5  $\mu$ m, hexane/isopropanol = 90/10, flow rate = 1 mL/min, detection at 254 nm) retention time = 37.8 min (major) and 45.8 min (minor).

**(3*S*,*E*)-2-Ethyl-5-(4-methoxyphenyl)-3-methyl-N-phenylpent-4-enamide (3l)**

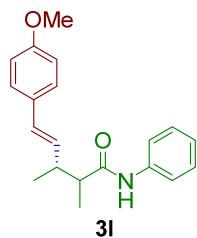

Following **method B**, **3l** was obtained as white solid after flash chromatography (PE: EtOAc = 6: 1) (44.4 mg, 72% yield, rr = 18:1, d.r. = 1.05 (89% ee): 1 (87% ee) was determined by GC and HPLC.

**<sup>1</sup>H NMR** (600 MHz, Chloroform-*d*)  $\delta$  7.44 (d, *J* = 7.9 Hz, 1H), 7.37 (d, *J* = 7.9 Hz, 1H), 7.26 – 7.12 (m, 5H), 7.04 – 6.94 (m, 1H), 6.77 (d, *J* = 8.7 Hz, 1H), 6.73 (d, *J* = 8.7 Hz, 1H), 6.32 (dd, *J* = 15.9, 11.9 Hz, 1H), 6.01 (dd, *J* = 15.9, 7.9 Hz, 1H), 3.73 (s, 3H), 2.64 – 2.47 (m, 1H), 2.29 – 2.22 (m, 1H), 1.19 – 1.13 (m, 6H).

**<sup>13</sup>C NMR** (101 MHz, Chloroform-*d*)  $\delta$  174.2, 159.0, 138.0, 131.1, 130.3, 129.5, 129.1, 127.4, 124.4, 120.4, 114.1, 55.4, 48.6, 41.2, 19.0, 16.3.

**HRMS (ESI-TOF)** Calcd for C<sub>21</sub>H<sub>26</sub>NO<sub>2</sub> (M+H)<sup>+</sup> 310.1802. Found 310.1806.

**HPLC** (AD-H, 0.46\*25 cm, 5  $\mu$ m, hexane/isopropanol = 90/10, flow rate = 1 mL/min, detection at 254 nm) retention time = 10.2 min (minor) and 11.7 min (major), 10.8 min (major) and 13.0 min (minor)

**(*S*,*E*)-N-(4-(4-methoxyphenyl)-2-methylbut-3-en-1-yl)benzamide (3m)**

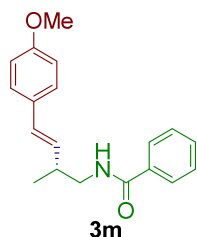

**3m**

Following **method A**, **3m** was obtained as white solid after flash chromatograph (PE: EtOAc = 6: 1) (36.6 mg, 62% yield, 85% ee). rr = 5: 1.

**<sup>1</sup>H NMR** (600 MHz, Chloroform-*d*)  $\delta$  7.72 – 7.70 (m, 2H), 7.48 – 7.44 (m, 1H), 7.41 – 7.38 (m, 2H), 7.30 – 7.28 (m, 2H), 6.86 – 6.84 (m, 2H), 6.42 (d,  $J$  = 15.8 Hz, 1H), 6.29 (s, 1H), 5.96 (dd,  $J$  = 15.8, 8.1 Hz, 1H), 3.80 (s, 3H), 3.65 – 3.61 (m, 1H), 3.29 – 3.24 (m, 1H), 2.65 – 2.58 (m, 1H), 1.17 (d,  $J$  = 6.8 Hz, 3H).

**<sup>13</sup>C NMR** (151 MHz, Chloroform-*d*)  $\delta$  167.6, 159.2, 134.9, 131.4, 131.0, 130.2, 130.0, 128.7, 127.4, 126.9, 114.1, 55.4, 45.4, 37.8, 18.4.

**HRMS (ESI-TOF)** Calcd for C<sub>19</sub>H<sub>22</sub>NO<sub>2</sub> (M+H)<sup>+</sup> 296.1645. Found 296.1647.

**HPLC** (OD-H, 0.46\*25 cm, 5  $\mu$ m, hexane/isopropanol = 90/10, flow rate = 1 mL/min, detection at 254 nm) retention time = 17.6 min (minor) and 27.5 min (major).

**(S,E)-N-(2-(4-methoxystyryl)hexyl)benzamide (3n)**

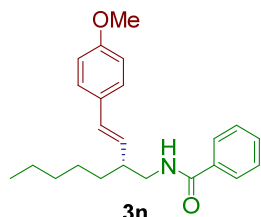

**3n**

Following **method A**, **3n** was obtained as white solid after flash chromatograph (PE: EtOAc = 6: 1) (52.6 mg, 78% yield, 92% ee). rr = 7: 1.

**<sup>1</sup>H NMR** (400 MHz, Chloroform-*d*)  $\delta$  7.71 – 7.69 (m, 2H), 7.47 – 7.43 (m, 1H), 7.40 – 7.36 (m, 2H), 7.31 – 7.29 (m, 2H), 6.87 – 6.85 (m, 2H), 6.42 (d,  $J$  = 15.8 Hz, 1H), 6.26 (s, 1H), 5.86 (dd,  $J$  = 15.8, 9.1 Hz, 1H), 3.80 (s, 3H), 3.79 – 3.68 (m, 1H), 3.20 – 3.13 (m, 1H), 2.48 – 2.39 (m, 1H), 1.57 – 1.50 (m, 1H), 1.45 – 1.25 (m, 7H), 0.88 (t,  $J$  = 6.6 Hz, 3H).

**<sup>13</sup>C NMR** (101 MHz, Chloroform-*d*)  $\delta$  167.5, 159.2, 134.9, 131.5, 131.4, 130.1, 130.0, 128.6, 127.4, 126.9, 114.1, 55.4, 44.2, 43.9, 33.1, 32.0, 26.9, 22.7, 14.2.

**HRMS (ESI-TOF)** Calcd for C<sub>22</sub>H<sub>30</sub>NO<sub>2</sub> (M+H)<sup>+</sup> 352.2271. Found 352.2275.

**HPLC** (AD-H, 0.46\*25 cm, 5  $\mu$ m, hexane/isopropanol = 90/10, flow rate = 1 mL/min, detection at 254 nm) retention time = 11.9 min (major) and 14.4 min (minor).

**Benzyl (S,E)-(4-(4-methoxyphenyl)-2-methylbut-3-en-1-yl)carbamate (3o)**

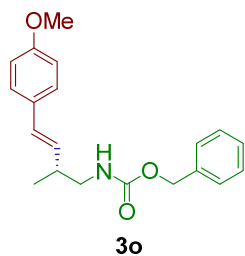

Following **method A**, **3o** was obtained as white solid after flash chromatograph (PE: EtOAc = 6: 1) (39.0mg, 60% yield, 85% ee). rr = 6: 1.

**<sup>1</sup>H NMR** (600 MHz, Chloroform-*d*)  $\delta$  7.27 – 7.17 (m, 7H), 6.76 (d, *J* = 8.7 Hz, 2H), 6.27 (d, *J* = 15.8 Hz, 1H), 5.80 (dd, *J* = 15.8, 8.0 Hz, 1H), 5.00 (s, 2H), 4.76 (s, 1H), 3.72 (s, 3H), 3.24 – 3.20 (m, 1H), 3.05 – 2.95 (m, 1H), 2.42 – 2.38 (m, 1H), 1.01 (d, *J* = 6.7 Hz, 3H).

**<sup>13</sup>C NMR** (151 MHz, Chloroform-*d*)  $\delta$  159.1, 156.5, 136.7, 130.7, 130.1, 128.6, 128.22, 128.18, 127.7, 127.4, 114.1, 66.7, 55.4, 46.7, 38.0, 18.1.

**HRMS (ESI-TOF)** Calcd for C<sub>20</sub>H<sub>24</sub>NO<sub>3</sub> (M+H)<sup>+</sup> 326.1751. Found 326.1752.

**HPLC** (IA, 0.46\*25 cm, 5  $\mu$ m, hexane/isopropanol = 90/10, flow rate = 1 mL/min, detection at 254 nm) retention time = 9.5 min (major) and 11.3 min (minor).

**(S,E)-3-Ethyl-N,5-diphenylpent-4-enamide (4a)**

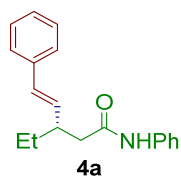

Following **method A**, **4a** was obtained as white solid after flash chromatograph (PE: EtOAc = 8: 1) (36.2 mg, 65% yield, 90% ee). rr = 13: 1.

**<sup>1</sup>H NMR** (400 MHz, Chloroform-*d*)  $\delta$  7.46 (s, 1H), 7.39 (d, *J* = 7.9 Hz, 2H), 7.29 – 7.18 (m, 6H), 7.16 – 7.12 (m, 1H), 7.03 – 7.00 (m, 1H), 6.41 (d, *J* = 15.8 Hz, 1H), 5.99 (dd, *J* = 15.8, 8.7 Hz, 1H), 2.67 – 2.61 (m, 1H), 2.43 (dd, *J* = 14.4, 6.0 Hz, 1H), 2.34 (dd, *J* = 14.4, 8.2 Hz, 1H), 1.58 – 1.50 (m, 1H), 1.44 – 1.31 (m, 1H), 0.87 (t, *J* = 7.4 Hz, 3H).

**<sup>13</sup>C NMR** (101 MHz, Chloroform-*d*)  $\delta$  170.4, 137.9, 137.3, 132.9, 131.3, 129.0, 128.6, 127.4, 126.3, 124.4, 120.2, 43.7, 42.0, 28.0, 11.8.

**HRMS (ESI-TOF)** Calcd for C<sub>19</sub>H<sub>22</sub>NO (M+H)<sup>+</sup> 280.1696. Found 280.1697.

**HPLC** (AD-H, 0.46\*25 cm, 5  $\mu$ m, hexane/isopropanol = 90/10, flow rate = 1 mL/min, detection at 254 nm) retention time = 10.5 min (major) and 12.9 min (minor).

**(S,E)-3-Ethyl-N-phenyl-5-(p-tolyl)pent-4-enamide (4b)**

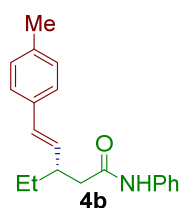

Following **method A**, **4b** was obtained as white solid after flash chromatograph (PE: EtOAc = 8: 1) (43.9 mg, 75% yield, 89% ee). rr = 12: 1.

**<sup>1</sup>H NMR** (400 MHz, Chloroform-*d*)  $\delta$  7.37 (d, *J* = 7.8 Hz, 2H), 7.26 – 7.12 (m, 5H), 7.03 – 6.97 (m, 3H), 6.37 (d, *J* = 15.8 Hz, 1H), 5.92 (dd, *J* = 15.8, 8.8 Hz, 1H), 2.63 – 2.56 (m, 1H), 2.41 (dd, *J* = 14.4, 5.9 Hz, 1H), 2.32 (dd, *J* = 14.4, 8.2 Hz, 1H), 2.24 (s, 3H), 1.59 – 1.47 (m, 1H), 1.48 – 1.31 (m, 1H), 0.85 (t, *J* = 7.4 Hz, 3H).

**<sup>13</sup>C NMR** (101 MHz, Chloroform-*d*)  $\delta$  170.4, 137.9, 137.2, 134.5, 131.9, 131.2, 129.3, 129.1, 126.2, 124.4, 120.1, 43.8, 42.0, 28.1, 21.3, 11.8.

**HRMS (ESI-TOF)** Calcd for C<sub>20</sub>H<sub>24</sub>NO (M+H)<sup>+</sup> 294.1853. Found 294.1853.

**HPLC** (AD-H, 0.46\*25 cm, 5  $\mu$ m, hexane/isopropanol = 90/10, flow rate = 1 mL/min, detection at 254 nm) retention time = 9.9 min (major) and 10.7 min (minor).

**(*S,E*)-3-Ethyl-5-(4-(methylthio)phenyl)-*N*-phenylpent-4-enamide (**4c**)**

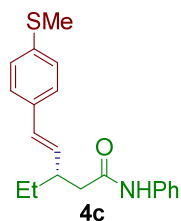

Following **method A**, **4c** was obtained as white solid after flash chromatograph (PE: EtOAc = 8: 1) (35.7 mg, 55% yield, 89% ee). rr = 12: 1.

**<sup>1</sup>H NMR** (400 MHz, Chloroform-*d*)  $\delta$  7.41 (d, *J* = 7.6 Hz, 2H), 7.33 (s, 1H), 7.26 – 7.22 (m, 4H), 7.18 – 7.10 (m, 2H), 7.06 – 7.02 (m, 1H), 6.39 (d, *J* = 15.8 Hz, 1H), 5.98 (dd, *J* = 15.8, 8.8 Hz, 1H), 2.72 – 2.59 (m, 1H), 2.49 – 2.43 (m, 4H), 2.36 (dd, *J* = 14.4, 8.2 Hz, 1H), 1.63 – 1.53 (m, 1H), 1.49 – 1.36 (m, 1H), 0.90 (t, *J* = 7.3 Hz, 3H).

**<sup>13</sup>C NMR** (101 MHz, Chloroform-*d*)  $\delta$  170.2, 137.9, 137.4, 134.4, 132.4, 130.7, 129.1, 126.9, 126.7, 124.4, 120.1, 43.7, 42.0, 28.0, 16.1, 11.9.

**HRMS (ESI-TOF)** Calcd for C<sub>20</sub>H<sub>24</sub>NOS (M+H)<sup>+</sup> 326.1573. Found 326.1572.

**HPLC** (AD-H, 0.46\*25 cm, 5  $\mu$ m, hexane/isopropanol = 90/10, flow rate = 1 mL/min, detection at 254 nm) retention time = 16.4 min (major) and 18.2 min (minor).

**(*S,E*)-5-(4-((*tert*-Butyldimethylsilyl)oxy)phenyl)-3-ethyl-*N*-phenylpent-4-enamide (**4d**)**

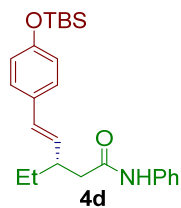

Following **method A**, **4d** was obtained as colorless oil after flash chromatograph (PE: EtOAc = 8: 1) (40.9 mg, 50% yield, 86% ee). rr = 12: 1.

**<sup>1</sup>H NMR** (600 MHz, Chloroform-*d*)  $\delta$  7.26 – 7.04 (m, 3H), 7.09 – 7.06 (m, 2H), 7.03 – 7.01 (m, 2H), 6.90 – 6.86 (m, 1H), 6.58 – 6.57 (m, 2H), 6.22 (d, *J* = 15.8 Hz, 1H), 5.72 (dd, *J* = 15.8, 8.8 Hz, 1H), 2.50 – 2.44

(m, 1H), 2.29 (dd,  $J = 14.4, 5.7$  Hz, 1H), 2.20 (dd,  $J = 14.4, 8.2$  Hz, 1H), 1.45 – 1.38 (m, 1H), 1.29 – 1.22 (m, 1H), 0.79 (s, 9H), 0.74 (t,  $J = 7.4$  Hz, 3H), 0.00 (s, 6H).

$^{13}\text{C}$  NMR (151 MHz, Chloroform- $d$ )  $\delta$  170.4, 155.2, 137.9, 130.9, 130.8, 130.7, 129.0, 127.3, 124.3, 120.3, 120.1, 43.9, 42.0, 28.1, 25.8, 18.3, 11.9, -4.3.

**HRMS (ESI-TOF)** Calcd for  $\text{C}_{25}\text{H}_{36}\text{NO}_2\text{Si}$  ( $\text{M}+\text{H}$ ) $^+$  410.2510. Found 410.2510.

**HPLC** (AD-H, 0.46\*25 cm, 5  $\mu\text{m}$ , hexane/isopropanol = 90/10, flow rate = 1 mL/min, detection at 254 nm) retention time = 5.5 min (major) and 6.1 min (minor).

**(*S,E*)-5-([1,1'-Biphenyl]-4-yl)-3-ethyl-*N*-phenylpent-4-enamide (4e)**

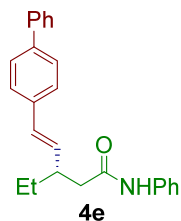

Following **method A**, **4e** was obtained as white solid after flash chromatograph (PE: EtOAc = 8: 1) (42.6 mg, 60% yield, 97% ee). rr = 14: 1.

$^1\text{H}$  NMR (400 MHz, Chloroform- $d$ )  $\delta$  7.60 – 7.58 (m, 2H), 7.55 – 7.53 (m, 2H), 7.47 – 7.41 (m, 6H), 7.36 – 7.34 (m, 1H), 7.33 – 7.26 (m, 3H), 7.11 – 7.06 (m, 1H), 6.54 (d,  $J = 15.8$  Hz, 1H), 6.12 (dd,  $J = 15.8, 8.8$  Hz, 1H), 2.79 – 2.70 (m, 1H), 2.53 (dd,  $J = 14.2, 5.6$  Hz, 1H), 2.43 (dd,  $J = 14.2, 8.2$  Hz, 1H), 1.71 – 1.66 (m, 1H), 1.55 – 1.44 (m, 1H), 0.97 (t,  $J = 7.3$  Hz, 3H).

$^{13}\text{C}$  NMR (101 MHz, Chloroform- $d$ )  $\delta$  170.2, 140.9, 140.2, 137.9, 136.4, 133.0, 130.9, 129.1, 128.9, 127.4, 127.12, 127.05, 126.7, 124.5, 120.1, 43.8, 42.1, 28.1, 11.9.

**HRMS (ESI-TOF)** Calcd for  $\text{C}_{25}\text{H}_{26}\text{NO}$  ( $\text{M}+\text{H}$ ) $^+$  356.2009. Found 356.2008.

**HPLC** (AD-H, 0.46\*25 cm, 5  $\mu\text{m}$ , hexane/isopropanol = 90/10, flow rate = 1 mL/min, detection at 254 nm) retention time = 15.9 min (major) and 18.9 min (minor).

**(*S,E*)-5-(4-Chlorophenyl)-3-ethyl-*N*-phenylpent-4-enamide (4f)**

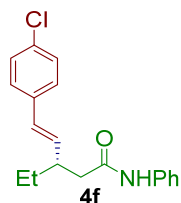

Following **method A**, **4f** was obtained as white solid after flash chromatograph (PE: EtOAc = 6: 1) (34.4 mg, 55% yield, 87% ee). rr = 8: 1.

$^1\text{H}$  NMR (600 MHz, Chloroform- $d$ )  $\delta$  7.37 (d,  $J = 7.8$  Hz, 2H), 7.22 – 7.18 (m, 7H), 7.03 – 6.99 (m, 1H), 6.35 (d,  $J = 15.8$  Hz, 1H), 5.96 (dd,  $J = 15.8, 8.7$  Hz, 1H), 2.69 – 2.59 (m, 1H), 2.43 (dd,  $J = 14.4, 5.8$  Hz, 1H), 2.32 (dd,  $J = 14.4, 8.2$  Hz, 1H), 1.58 – 1.49 (m, 1H), 1.43 – 1.35 (m, 1H), 0.86 (t,  $J = 7.4$  Hz, 3H).

$^{13}\text{C}$  NMR (151 MHz, Chloroform- $d$ )  $\delta$  170.1, 137.8, 135.8, 133.6, 133.0, 130.1, 129.1, 128.8, 127.5, 124.5, 120.1, 43.7, 42.0, 28.0, 11.9.

**HRMS (ESI-TOF)** Calcd for  $\text{C}_{19}\text{H}_{21}\text{ClNO}$  ( $\text{M}+\text{H}$ ) $^+$  314.1306. Found 314.1303.



**HPLC** (AD-H, 0.46\*25 cm, 5  $\mu$ m, hexane/isopropanol = 90/10, flow rate = 1 mL/min, detection at 254 nm) retention time = 21.0 min (major) and 24.7 min (minor).

**(*S,E*)-3-Ethyl-*N*-phenyl-5-(4-(4,4,5,5-tetramethyl-1,3,2-dioxaborolan-2-yl)phenyl)pent-4-enamide (4g)**

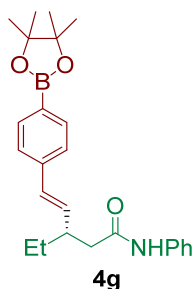

Following **method B**, **4g** was obtained as colorless oil after flash chromatograph (PE: EtOAc = 6: 1) (48.6 mg, 60% yield, 85% ee). rr = 9: 1.

**<sup>1</sup>H NMR** (600 MHz, Chloroform-*d*)  $\delta$  7.67 – 7.65 (m, 2H), 7.37 – 7.35 (m, 2H), 7.28 – 7.26 (m, 2H), 7.23 – 7.18 (m, 3H), 7.03 – 7.00 (m, 1H), 6.42 (d, *J* = 15.8 Hz, 1H), 6.06 (dd, *J* = 15.8, 8.8 Hz, 1H), 2.70 – 2.58 (m, 1H), 2.42 (dd, *J* = 14.2, 5.8 Hz, 1H), 2.33 (dd, *J* = 14.2, 8.2 Hz, 1H), 1.58 – 1.52 (m, 1H), 1.43 – 1.37 (m, 1H), 1.26 (s, 12H), 0.87 (t, *J* = 7.3 Hz, 3H).

**<sup>13</sup>C NMR** (151 MHz, Chloroform-*d*)  $\delta$  170.2, 140.0, 137.8, 135.2, 134.0, 131.4, 129.1, 125.6, 124.4, 120.14, 120.12, 83.9, 43.7, 42.1, 28.0, 25.0, 11.9.

**HRMS (ESI-TOF)** Calcd for C<sub>25</sub>H<sub>33</sub>BNO<sub>3</sub> (M+H)<sup>+</sup> 406.2548. Found 406.2542.

**HPLC** (AD-H, 0.46\*25 cm, 5  $\mu$ m, hexane/isopropanol = 90/10, flow rate = 0.7 mL/min, detection at 254 nm) retention time = 12.3 min (major) and 14.4 min (minor).

**Methyl (*S,E*)-4-(3-methyl-5-oxo-5-(phenylamino)pent-1-en-1-yl)benzoate (4h)**

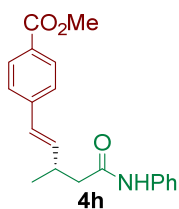

Following **method B**, **4h** was obtained as white solid after flash chromatograph (PE: EtOAc = 6: 1) (35.5 mg, 55% yield, 88% ee). rr = 8: 1.

**<sup>1</sup>H NMR** (400 MHz, Chloroform-*d*)  $\delta$  7.96 – 7.94 (m, 2H), 7.50 – 7.48 (m, 2H), 7.45 (s, 1H), 7.38 – 7.36 (m, 2H), 7.31 – 7.27 (m, 2H), 7.11 – 7.07 (m, 1H), 6.47 (d, *J* = 15.8 Hz, 1H), 6.32 (dd, *J* = 15.8, 7.2 Hz, 1H), 3.90 (s, 3H), 3.06 – 2.96 (m, 1H), 2.48 (dd, *J* = 14.2, 7.2 Hz, 1H), 2.40 (dd, *J* = 14.2, 7.2 Hz, 1H), 1.21 (d, *J* = 6.7 Hz, 3H).

**<sup>13</sup>C NMR** (151 MHz, Chloroform-*d*)  $\delta$  169.9, 167.1, 142.0, 137.9, 137.3, 130.0, 129.1, 128.7, 128.5, 126.1, 124.5, 120.1, 52.2, 45.0, 34.5, 20.1.

**HRMS (ESI-TOF)** Calcd for C<sub>20</sub>H<sub>22</sub>NO<sub>3</sub> (M+H)<sup>+</sup> 324.1594. Found 324.1590.

**HPLC** (AD-H, 0.46\*25 cm, 5  $\mu$ m, hexane/isopropanol = 90/10, flow rate = 0.5 mL/min, detection at 254 nm) retention time = 69.8 min (major) and 76.2 min (minor).

**(*S,E*)-3-Ethyl-5-(3-methoxyphenyl)-*N*-phenylpent-4-enamide (4i)**

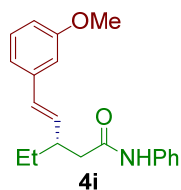

Following **method A**, **4i** was obtained as white solid after flash chromatograph (PE: EtOAc = 6: 1) (32.1 mg, 52% yield, 90% ee). rr = 8: 1.

**<sup>1</sup>H NMR** (400 MHz, Chloroform-*d*)  $\delta$  7.38 – 7.36 (m, 2H), 7.30 (s, 1H), 7.22 – 7.18 (m, 2H), 7.15 – 7.11 (m, 1H), 7.02 – 6.98 (m, 1H), 6.87 – 6.85 (m, 1H), 6.80 – 6.79 (m, 1H), 6.71 – 6.68 (m, 1H), 6.38 (d, *J* = 15.8 Hz, 1H), 5.98 (dd, *J* = 15.8, 8.8 Hz, 1H), 3.71 (s, 3H), 2.67 – 2.58 (m, 1H), 2.42 (dd, *J* = 14.2, 5.8 Hz, 1H), 2.32 (dd, *J* = 14.2, 8.2 Hz, 1H), 1.60 – 1.50 (m, 1H), 1.46 – 1.31 (m, 1H), 0.86 (t, *J* = 7.4 Hz, 3H).

**<sup>13</sup>C NMR** (101 MHz, Chloroform-*d*)  $\delta$  170.2, 159.9, 138.8, 137.9, 133.2, 131.2, 129.6, 129.1, 124.4, 120.2, 118.9, 113.0, 111.7, 55.3, 43.7, 42.0, 28.0, 11.8.

**HRMS (ESI-TOF)** Calcd for C<sub>20</sub>H<sub>24</sub>NO<sub>2</sub> (M+H)<sup>+</sup> 310.1802. Found 310.1802.

**HPLC** (AD-H, 0.46\*25 cm, 5  $\mu$ m, hexane/isopropanol = 90/10, flow rate = 1 mL/min, detection at 254 nm) retention time = 13.3 min (major) and 16.9 min (minor).

**(*S,E*)-5-(4-Bromophenyl)-3-ethyl-*N*-phenylpent-4-enamide (4j)**

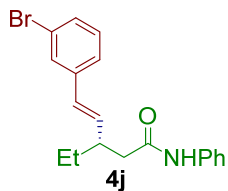

Following **method A**, **4j** was obtained as white solid after flash chromatograph (PE: EtOAc = 8: 1) (47.8 mg, 67% yield, 90% ee). rr = 10: 1.

**<sup>1</sup>H NMR** (600 MHz, Chloroform-*d*)  $\delta$  7.42 (s, 1H), 7.38 – 7.37 (m, 2H), 7.25 – 7.18 (m, 4H), 7.15 – 7.14 (m, 1H), 7.08 – 7.06 (m, 1H), 7.03 – 7.01 (m, 1H), 6.32 (d, *J* = 15.8 Hz, 1H), 5.99 (dd, *J* = 15.8, 8.8 Hz, 1H), 2.67 – 2.62 (m, 1H), 2.42 (dd, *J* = 14.4, 5.8 Hz, 1H), 2.31 (dd, *J* = 14.4, 8.2 Hz, 1H), 1.57 – 1.52 (m, 1H), 1.42 – 1.35 (m, 1H), 0.86 (t, *J* = 7.2 Hz, 3H).

**<sup>13</sup>C NMR** (151 MHz, Chloroform-*d*)  $\delta$  170.0, 139.5, 137.8, 134.5, 130.23, 130.18, 129.9, 129.1, 129.0, 125.1, 124.5, 122.9, 120.2, 43.6, 42.0, 27.9, 11.9.

**HRMS (ESI-TOF)** Calcd for C<sub>19</sub>H<sub>21</sub>BrNO (M+H)<sup>+</sup> 358.0801. Found 358.0799.

**HPLC** (AD-H, 0.46\*25 cm, 5  $\mu$ m, hexane/isopropanol = 90/10, flow rate = 1 mL/min, detection at 254 nm) retention time = 12.2 min (major) and 13.7 min (minor).

**(*S,E*)-3-Ethyl-5-(2-methoxyphenyl)-*N*-phenylpent-4-enamide (4k)**

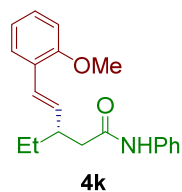

Following **method A**, **4k** was obtained as white solid after flash chromatograph (PE: EtOAc = 6: 1) (43.2 mg, 70% yield, 89% ee). rr = 12: 1.

**<sup>1</sup>H NMR** (400 MHz, Chloroform-*d*) δ 7.48 (s, 1H), 7.40 – 7.38 (m, 2H), 7.33 – 7.31 (m, 1H), 7.20 – 7.16 (m, 2H), 7.14 – 7.10 (m, 1H), 7.00 – 6.96 (m, 1H), 6.84 – 6.80 (m, 1H), 6.77 – 6.75 (m, 1H), 6.75 (d, *J* = 16.0 Hz, 1H), 5.98 (dd, *J* = 16.0, 8.7 Hz, 1H), 3.70 (s, 3H), 2.65 – 2.56 (m, 1H), 2.44 – 2.32 (m, 2H), 1.59 – 1.48 (m, 1H), 1.44 – 1.33 (m, 1H), 0.86 (t, *J* = 7.4 Hz, 3H).

**<sup>13</sup>C NMR** (101 MHz, Chloroform-*d*) δ 170.5, 156.6, 138.0, 133.7, 129.0, 128.5, 126.7, 126.4, 126.2, 124.3, 120.7, 120.2, 111.0, 55.5, 43.7, 42.4, 28.1, 11.8.

**HRMS (ESI-TOF)** Calcd for C<sub>20</sub>H<sub>24</sub>NO<sub>2</sub> (M+H)<sup>+</sup> 310.1802. Found 310.1802.

**HPLC** (AD-H, 0.46\*25 cm, 5 μm, hexane/isopropanol = 90/10, flow rate = 1 mL/min, detection at 254 nm) retention time = 13.0 min (major) and 15.9 min (minor).

**(*S,E*)-3-Ethyl-5-(2-fluorophenyl)-*N*-phenylpent-4-enamide (**4l**)**

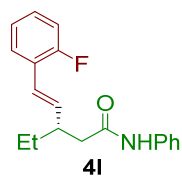

Following **method A**, **4l** was obtained as white solid after flash chromatograph (PE: EtOAc = 8: 1) (37.5 mg, 63% yield, 93% ee). rr = 9: 1.

**<sup>1</sup>H NMR** (400 MHz, Chloroform-*d*) δ 7.48 – 7.46 (m, 2H), 7.40 – 7.36 (m, 1H), 7.35 (s, 1H), 7.28 – 7.22 (m, 2H), 7.22 – 7.14 (m, 1H), 7.12 – 7.05 (m, 2H), 7.05 – 6.96 (m, 1H), 6.62 (d, *J* = 16.0 Hz, 1H), 6.17 (dd, *J* = 16.0, 8.7 Hz, 1H), 2.78 – 2.69 (m, 1H), 2.51 (dd, *J* = 14.2, 6.0 Hz, 1H), 2.43 (dd, *J* = 14.2, 8.1 Hz, 1H), 1.69 – 1.59 (m, 1H), 1.55 – 1.41 (m, 1H), 0.95 (t, *J* = 7.4 Hz, 3H).

**<sup>13</sup>C NMR** (101 MHz, Chloroform-*d*) δ 170.1, 160.2 (d, *J* = 248.7 Hz), 137.9, 135.8 (d, *J* = 4.9 Hz), 129.1, 128.6 (d, *J* = 8.4 Hz), 127.6 (d, *J* = 4.0 Hz), 125.1 (d, *J* = 12.3 Hz), 124.4, 124.2 (d, *J* = 3.6 Hz), 123.7 (d, *J* = 3.2 Hz), 120.2, 115.8 (d, *J* = 2.2 Hz), 43.6, 42.4, 27.9, 11.8.

**<sup>19</sup>F NMR** (376 MHz, Chloroform-*d*) δ -118.15 – -118.22 (m, 1F).

**HRMS (ESI-TOF)** Calcd for C<sub>19</sub>H<sub>21</sub>FNO (M+H)<sup>+</sup> 298.1602. Found 298.1601.

**HPLC** (OD-H, 0.46\*25 cm, 5 μm, hexane/isopropanol = 90/10, flow rate = 1 mL/min, detection at 254 nm) retention time = 15.2 min (minor) and 16.9 min (major).

**(*S,E*)-5-(3,5-Bis(trifluoromethyl)phenyl)-3-methyl-*N*-phenylpent-4-enamide (**4m**)**

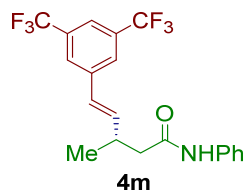

Following **method A**, **4m** was obtained as white solid after flash chromatograph (PE: EtOAc = 8: 1) (64.1 mg, 80% yield, 87% ee). rr = 9: 1.

**<sup>1</sup>H NMR** (400 MHz, Chloroform-*d*)  $\delta$  7.68 – 7.54 (m, 4H), 7.42 – 7.40 (m, 2H), 7.21 – 7.17 (m, 2H), 7.02 – 6.99 (m, 1H), 6.37 (d, *J* = 15.8 Hz, 1H), 6.23 (dd, *J* = 15.8, 7.3 Hz, 1H), 2.97 – 2.90 (m, 1H), 2.42 – 2.30 (m, 2H), 1.12 (d, *J* = 6.8 Hz, 3H).

**<sup>13</sup>C NMR** (101 MHz, Chloroform-*d*)  $\delta$  169.9, 139.5, 138.6, 137.8, 131.9 (q, *J* = 33.2 Hz), 129.1, 126.8, 126.0 (d, *J* = 4.0 Hz), 124.7, 123.4 (q, *J* = 273.7 Hz), 120.6 (p, *J* = 3.4 Hz), 120.3, 44.6, 34.5, 20.0.

**<sup>19</sup>F NMR** (376 MHz, Chloroform-*d*)  $\delta$  -63.0 (s, 6F).

**HRMS (ESI-TOF)** Calcd for C<sub>20</sub>H<sub>18</sub>F<sub>6</sub>NO (M+H)<sup>+</sup> 402.1287. Found 402.1284.

**HPLC** (AD-H, 0.46\*25 cm, 5  $\mu$ m, hexane/isopropanol = 90/10, flow rate = 1 mL/min, detection at 254 nm) retention time = 10.7 min (minor) and 13.5 min (major).

**(*S,E*)-3-Methyl-5-(naphthalen-1-yl)-*N*-phenylpent-4-enamide (**4n**)**

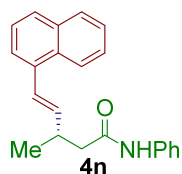

Following **method B**, **4n** was obtained as white solid after flash chromatograph (PE: EtOAc = 6: 1) (49.2 mg, 78% yield, 85% ee). rr = 7: 1.

**<sup>1</sup>H NMR** (400 MHz, Chloroform-*d*)  $\delta$  7.94 – 7.92 (m, 1H), 7.73 – 7.71 (m, 1H), 7.66 – 7.64 (m, 1H), 7.49 – 7.29 (m, 7H), 7.20 – 7.16 (m, 2H), 7.09 (d, *J* = 15.6 Hz, 1H), 7.01 – 6.97 (m, 1H), 6.06 (dd, *J* = 15.6, 7.6 Hz, 1H), 3.05 – 2.95 (m, 1H), 2.45 – 2.29 (m, 2H), 1.17 (d, *J* = 6.7 Hz, 3H).

**<sup>13</sup>C NMR** (101 MHz, Chloroform-*d*)  $\delta$  170.3, 137.9, 137.7, 135.3, 133.6, 131.2, 129.1, 128.5, 127.7, 126.9, 126.0, 125.8, 125.7, 124.5, 124.0, 123.8, 120.2, 45.3, 35.0, 20.4.

**HRMS (ESI-TOF)** Calcd for C<sub>22</sub>H<sub>22</sub>NO (M+H)<sup>+</sup> 316.1696. Found 316.1695.

**HPLC** (AD-H, 0.46\*25 cm, 5  $\mu$ m, hexane/isopropanol = 90/10, flow rate = 1 mL/min, detection at 254 nm) retention time = 13.3 min (major) and 14.7 min (minor).

**(*S,E*)-3-Ethyl-5-(naphthalen-2-yl)-*N*-phenylpent-4-enamide (**4o**)**

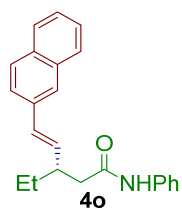

Following **method B**, **4o** was obtained as white solid after flash chromatograph (PE: EtOAc = 6: 1) (48.7 mg, 74% yield, 87% ee). rr = 13: 1.

**<sup>1</sup>H NMR** (600 MHz, Chloroform-*d*)  $\delta$  7.73 – 7.64 (m, 3H), 7.59 (s, 1H), 7.49 – 7.47 (m, 1H), 7.41 – 7.28 (m, 5H), 7.22 – 7.15 (m, 2H), 7.00 – 6.96 (m, 1H), 6.56 (d, *J* = 15.8 Hz, 1H), 6.11 (dd, *J* = 15.8, 8.8 Hz, 1H), 2.71 – 2.65 (m, 1H), 2.45 (dd, *J* = 14.4, 5.9 Hz, 1H), 2.36 (dd, *J* = 14.4, 8.2 Hz, 1H), 1.61 – 1.55 (m, 1H), 1.49 – 1.38 (m, 1H), 0.89 (t, *J* = 7.4 Hz, 3H).

**<sup>13</sup>C NMR** (151 MHz, Chloroform-*d*)  $\delta$  170.2, 137.8, 134.7, 133.7, 133.2, 132.9, 131.4, 129.0, 128.2, 127.9, 127.7, 126.3, 125.9, 125.7, 124.3, 123.5, 120.1, 43.7, 42.1, 28.0, 11.8.

**HRMS (ESI-TOF)** Calcd for C<sub>23</sub>H<sub>24</sub>NO (M+H)<sup>+</sup> 330.1853. Found 330.1852.

**HPLC** (AD-H, 0.46\*25 cm, 5  $\mu$ m, hexane/isopropanol = 90/10, flow rate = 1 mL/min, detection at 254 nm) retention time = 15.2 min (major) and 16.7 min (minor).

**(*S,E*)-3-Ethyl-5-(9-ethyl-9*H*-carbazol-3-yl)-*N*-phenylpent-4-enamide (4p)**

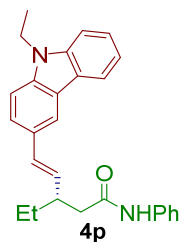

Following **method B**, **4p** was obtained as white solid after flash chromatograph (PE: EtOAc = 6: 1) (49.9 mg, 63% yield, 91% ee). rr = 9: 1.

**<sup>1</sup>H NMR** (400 MHz, Chloroform-*d*)  $\delta$  8.12 – 8.10 (m, 2H), 7.58 – 7.39 (m, 6H), 7.38 – 7.19 (m, 4H), 7.11 – 7.06 (m, 1H), 6.72 (d, *J* = 15.8 Hz, 1H), 6.12 (dd, *J* = 15.8, 8.7 Hz, 1H), 4.37 (q, *J* = 7.2 Hz, 2H), 2.81 – 2.72 (m, 1H), 2.58 (dd, *J* = 14.4, 5.6 Hz, 1H), 2.49 (dd, *J* = 14.4, 8.4 Hz, 1H), 1.77 – 1.66 (m, 1H), 1.60 – 1.52 (m, 1H), 1.45 (t, *J* = 7.2 Hz, 3H), 1.02 (t, *J* = 7.4 Hz, 3H).

**<sup>13</sup>C NMR** (101 MHz, Chloroform-*d*)  $\delta$  170.5, 140.4, 139.6, 138.0, 132.2, 130.2, 129.1, 128.5, 125.9, 124.3, 124.2, 123.3, 123.1, 120.6, 120.1, 119.0, 118.3, 108.7, 108.6, 44.1, 42.3, 37.7, 28.3, 13.9, 11.9.

**HRMS (ESI-TOF)** Calcd for C<sub>27</sub>H<sub>29</sub>N<sub>2</sub>O (M+H)<sup>+</sup> 397.2275. Found 397.2273.

**HPLC** (IA, 0.46\*25 cm, 5  $\mu$ m, hexane/isopropanol = 95/5, flow rate = 1 mL/min, detection at 254 nm) retention time = 48.7 min (major) and 52.9 min (minor).

**(*S,E*)-3-Ethyl-*N*-phenyl-5-(thiophen-3-yl)pent-4-enamide (4q)**

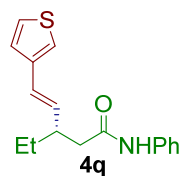

Following **method A**, **4q** was obtained as white solid after flash chromatograph (PE: EtOAc = 6: 1) (31.9 mg, 56% yield, 89% ee). rr = 11: 1.

**<sup>1</sup>H NMR** (400 MHz, Chloroform-*d*)  $\delta$  7.38– 7.36 (m, 3H), 7.24 – 7.14 (m, 3H), 7.11 – 7.10 (m, 1H), 7.02 – 6.98 (m, 2H), 6.40 (d, *J* = 15.8 Hz, 1H), 5.83 (dd, *J* = 15.8, 8.7 Hz, 1H), 2.63 – 2.54 (m, 1H), 2.40 (dd, *J* = 14.4, 5.8 Hz, 1H), 2.31 (dd, *J* = 14.4, 8.2 Hz, 1H), 1.58 – 1.48 (m, 1H), 1.42 – 1.30 (m, 1H), 0.85 (t, *J* = 7.4 Hz, 3H).

$^{13}\text{C}$  NMR (101 MHz, Chloroform-*d*)  $\delta$  170.2, 139.8, 137.8, 132.6, 129.0, 126.0, 125.4, 124.9, 124.3, 121.4, 120.1, 43.6, 41.8, 27.9, 11.7.

**HRMS (ESI-TOF)** Calcd for  $\text{C}_{17}\text{H}_{20}\text{NOS}$  ( $\text{M}+\text{H}$ ) $^{+}$  286.1260. Found 286.1259.

**HPLC** (AD-H, 0.46\*25 cm, 5  $\mu\text{m}$ , hexane/isopropanol = 90/10, flow rate = 1 mL/min, detection at 254 nm) retention time = 13.1 min (major) and 16.2 min (minor).

**(*S,E*)-3-Ethyl-5-(2-methoxypyridin-4-yl)-*N*-phenylpent-4-enamide (4r)**

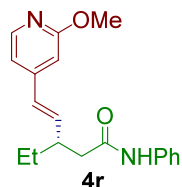

Following **method A**, **4r** was obtained as white solid after flash chromatograph (PE: EtOAc = 6: 1) (40.3 mg, 65% yield, 89% ee). rr = 9: 1.

$^1\text{H}$  NMR (400 MHz, Chloroform-*d*)  $\delta$  7.98 – 7.97 (m, 1H), 7.53 – 7.51 (m, 2H), 7.39 – 7.37 (m, 2H), 7.21 – 7.17 (m, 2H), 7.01 – 6.98 (m, 1H), 6.61 – 6.58 (m, 1H), 6.30 (d,  $J$  = 15.8 Hz, 1H), 5.85 (dd,  $J$  = 15.8, 8.8 Hz, 1H), 3.84 (s, 3H), 2.68 – 2.56 (m, 1H), 2.41 (dd,  $J$  = 14.4, 5.9 Hz, 1H), 2.31 (dd,  $J$  = 14.4, 8.3 Hz, 1H), 1.57 – 1.49 (m, 1H), 1.41 – 1.30 (m, 1H), 0.84 (t,  $J$  = 7.4 Hz, 3H).

$^{13}\text{C}$  NMR (101 MHz, Chloroform-*d*)  $\delta$  170.3, 163.4, 145.0, 137.9, 135.7, 132.4, 129.1, 127.1, 126.6, 124.4, 120.1, 110.9, 53.7, 43.6, 42.0, 28.0, 11.8.

**HRMS (ESI-TOF)** Calcd for  $\text{C}_{19}\text{H}_{23}\text{N}_2\text{O}_2$  ( $\text{M}+\text{H}$ ) $^{+}$  311.1754. Found 311.1752.

**HPLC** (IA, 0.46\*25 cm, 5  $\mu\text{m}$ , hexane/isopropanol = 90/10, flow rate = 1 mL/min, detection at 254 nm) retention time = 14.3 min (major) and 16.4 min (minor).

**(*S,Z*)-3-Methyl-*N*,5-diphenylpent-4-enamide (4s)**

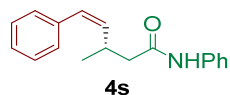

Following **method B**, **4s** was obtained as colorless oil after flash chromatograph (PE: Et<sub>2</sub>O = 4: 1) (26.6 mg, 51% yield, 93% ee). rr = 5: 1.

$^1\text{H}$  NMR (600 MHz, Chloroform-*d*)  $\delta$  7.33 – 7.31 (m, 2H), 7.27 – 7.24 (m, 2H), 7.23 – 7.20 (m, 3H), 7.20 – 7.15 (m, 2H), 7.06 (s, 1H), 7.02 – 6.99 (m, 1H), 6.40 (d,  $J$  = 11.0 Hz, 1H), 5.47 (t,  $J$  = 11.0 Hz, 1H), 3.34 – 3.26 (m, 1H), 2.35 (dd,  $J$  = 14.4, 7.5 Hz, 1H), 2.29 (dd,  $J$  = 14.4, 6.6 Hz, 1H), 1.12 (d,  $J$  = 6.6 Hz, 3H).

$^{13}\text{C}$  NMR (151 MHz, Chloroform-*d*)  $\delta$  169.8, 137.9, 137.1, 136.7, 129.3, 129.1, 128.7, 128.6, 127.1, 124.4, 120.0, 45.6, 30.2, 21.3.

**HRMS (ESI-TOF)** Calcd for  $\text{C}_{18}\text{H}_{20}\text{NO}$  ( $\text{M}+\text{H}$ ) $^{+}$  266.1540. Found 266.1536.

**HPLC** (AD-H, 0.46\*25 cm, 5  $\mu\text{m}$ , hexane/isopropanol = 90/10, flow rate = 1 mL/min, detection at 254 nm) retention time = 9.7 min (minor) and 10.3 min (major).

**(*S*)-3-Methyl-*N*,4-diphenylpent-4-enamide (4t)**

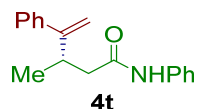

Following **method C**, **4t** was obtained as colorless oil after flash chromatography (PE: Et<sub>2</sub>O = 4: 1) (21.7 mg, 41% yield, 93% ee). rr = 5: 1.

<sup>1</sup>H NMR (400 MHz, Chloroform-*d*) δ 7.42 – 7.36 (m, 2H), 7.35 – 7.30 (m, 2H), 7.29 – 7.26 (m, 1H), 7.22 (m, 4H), 7.15 – 7.13 (m, 1H), 7.05 – 6.98 (m, 1H), 5.19 (s, 1H), 5.05 (s, 1H), 3.33 – 3.25 (m, 1H), 2.53 (dd, *J* = 14.4, 5.6 Hz, 1H), 2.19 (dd, *J* = 14.4, 8.3 Hz, 1H), 1.17 (d, *J* = 6.9 Hz, 3H).

<sup>13</sup>C NMR (101 MHz, Chloroform-*d*) δ 170.5, 153.7, 142.1, 138.1, 129.3, 128.7, 128.0, 127.9, 127.1, 120.2, 112.2, 44.4, 35.4, 20.0.

**HRMS (ESI-TOF)** Calcd for C<sub>18</sub>H<sub>20</sub>NO (*M*+H)<sup>+</sup> 266.1540. Found 266.1538.

**HPLC** (AD-H, 0.46\*25 cm, 5 μm, hexane/isopropanol = 90/10, flow rate = 1 mL/min, detection at 254 nm) retention time = 8.6 min (major) and 12.1 min (minor).

**(*S,E*)-3-Methyl-*N*,5-diphenylhex-4-enamide (4u)**

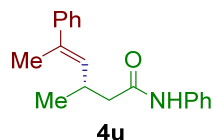

Following **method C**, **4u** was obtained as white solid after flash chromatography (PE: Et<sub>2</sub>O = 4: 1) (25.6 mg, 46% yield, 94% ee). rr = 5: 1.

<sup>1</sup>H NMR (600 MHz, Chloroform-*d*) δ 7.47 – 7.45 (m, 2H), 7.37 – 7.35 (m, 2H), 7.32 – 7.29 (m, 4H), 7.25 – 7.23 (m, 1H), 7.18 (s, 1H), 7.11 – 7.07 (m, 1H), 5.62 (d, *J* = 9.5 Hz, 1H), 3.23 – 3.16 (m, 1H), 2.46 – 2.36 (m, 2H), 2.09 (s, 3H), 1.17 (d, *J* = 6.6 Hz, 3H).

<sup>13</sup>C NMR (101 MHz, Chloroform-*d*) δ 170.3, 143.6, 138.0, 135.7, 132.6, 129.1, 128.4, 127.0, 125.9, 124.4, 120.0, 45.7, 31.1, 21.4, 16.3.

**HRMS (ESI-TOF)** Calcd for C<sub>19</sub>H<sub>22</sub>NO (*M*+H)<sup>+</sup> 280.1696. Found 280.1695.

**HPLC** (AD-H, 0.46\*25 cm, 5 μm, hexane/isopropanol = 90/10, flow rate = 1 mL/min, detection at 254 nm) retention time = 8.3 min (major) and 9.7 min (minor).

**(*S,E*)-5-Methyl-7-oxo-7-(phenylamino)hept-3-en-1-yl benzoate (4v)**

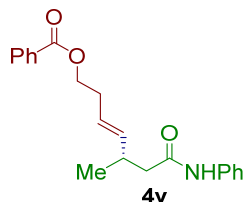

Following **method D**, **4v** was obtained as white solid after flash chromatography (PE: EtOAc = 10: 1) (28.4 mg, 42% yield, 87% ee). rr = 3: 1.

<sup>1</sup>H NMR (400 MHz, Chloroform-*d*) δ 7.95 – 7.94 (m, 2H), 7.49 – 7.46 (m, 1H), 7.41 – 7.40 (m, 2H), 7.37 – 7.34 (m, 2H), 7.23 – 7.18 (m, 4H), 5.53 – 5.47 (m, 2H), 4.27 – 4.23 (m, 2H), 2.73 – 2.67 (m, 1H), 2.41 – 2.38 (m, 2H), 2.26 (dd, *J* = 14.2, 7.4 Hz, 1H), 2.19 (dd, *J* = 14.2, 7.0 Hz, 1H), 1.01 (d, *J* = 6.7 Hz, 3H).

<sup>13</sup>C NMR (101 MHz, Chloroform-*d*) δ 170.1, 166.6, 137.8, 137.4, 132.9, 130.3, 129.5, 129.0, 128.4, 125.0, 124.3, 119.8, 64.3, 45.2, 34.0, 32.1, 20.3.

**HRMS (ESI-TOF)** Calcd for C<sub>21</sub>H<sub>24</sub>NO<sub>3</sub> (M+H)<sup>+</sup> 338.1751. Found 338.1749.

**HPLC** (AD-H, 0.46\*25 cm, 5 μm, hexane/isopropanol = 90/10, flow rate = 1 mL/min, detection at 254 nm) retention time = 16.7 min (major) and 21.2 min (minor).

## VII. Mechanistic experiments

### 7.1 Isotope experiments

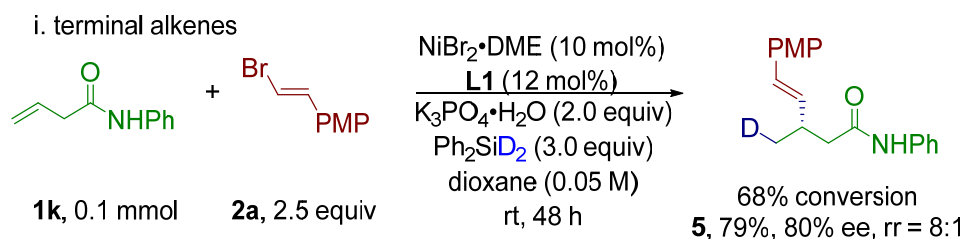

In a nitrogen-filled glovebox, NiBr<sub>2</sub>·DME (3.1 mg, 0.01 mmol, 10 mol%) and **L1** (5.8 mg, 0.012 mmol, 12 mol%) were dissolved in dioxane (2.0 mL, 0.05 M) in a 10 mL Schlenk tube with screw-cap equipped with a magnetic stirrer. The mixture was stirred at room temperature for 10 min, then alkene **1k** (16.0 mg, 0.1 mmol, 1.0 equiv), **2a** (55.0 mg, 0.25 mmol, 2.5 equiv), K<sub>3</sub>PO<sub>4</sub>·H<sub>2</sub>O (46.0 mg, 0.2 mmol, 2.0 equiv) and Ph<sub>2</sub>SiD<sub>2</sub> (56.0 mg, 0.3 mmol, 3.0 equiv) were sequentially added. The mixture was stirred at room temperature for 48 h. The mixture was quenched with H<sub>2</sub>O (2.0 mL) and extracted with ethyl acetate (10 mL), then filtered through a pad of diatomite. The organic phase was dried over Na<sub>2</sub>SO<sub>4</sub>, filtered, concentrated under reduced pressure. The crude mixture was purified by flash column chromatography on silica gel using a mixture of PE: EtOAc = 8:1 as eluent to give **5** as white solid (16.1 mg, 79% yield, 80% ee). Yield was calculated based on the recovery of alkene and the deuterated ratio was confirmed by <sup>1</sup>H NMR (96 % D).

<sup>1</sup>H NMR (400 MHz, Chloroform-*d*) δ 7.40 – 7.38 (m, 2H), 7.22 – 7.19 (m, 5H), 7.02 – 7.00 (m, 1H), 6.77 – 6.75 (m, 2H), 6.34 (d, *J* = 15.8 Hz, 1H), 5.98 (dd, *J* = 15.8, 7.4 Hz, 1H), 3.72 (s, 3H), 2.89 – 2.83 (m, 1H), 2.39 (dd, *J* = 14.4, 7.3 Hz, 1H), 2.30 (dd, *J* = 14.4, 6.9 Hz, 1H), 1.11 (d, *J* = 6.8 Hz, 2H).

<sup>13</sup>C NMR (101 MHz, Chloroform-*d*) δ 170.1, 159.0, 137.8, 132.1, 130.0, 129.0, 128.8, 127.3, 124.3, 120.0, 114.0, 55.3, 45.3, 34.3, 20.1 (t, *J* = 20.2 Hz).

**HRMS (ESI-TOF)** Calcd for C<sub>19</sub>H<sub>21</sub>DNO<sub>2</sub> (M+H)<sup>+</sup> 297.1708. Found 297.1706.

**HPLC** (OD-H, 0.46\*25 cm, 5 μm, hexane/isopropanol = 90/10, flow rate = 1 mL/min, detection at 254 nm) retention time = 39.5 min (major) and 47.2 min (minor).

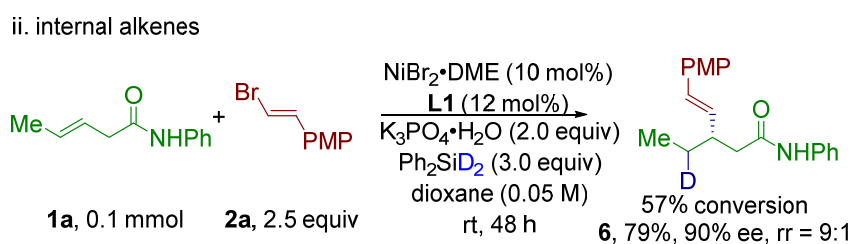



In a nitrogen-filled glovebox, NiBr<sub>2</sub>•DME (3.1 mg, 0.01 mmol, 10 mol%) and **L1** (5.8 mg, 0.012 mmol, 12 mol%) were dissolved in dioxane (2.0 mL, 0.05 M) in a 10 mL Schlenk tube with screw-cap equipped with a magnetic stirrer. The mixture was stirred at room temperature for 10 min, then **1a** (17.5 mg, 0.1 mmol, 1.0 equiv), **2a** (55.0 mg, 0.25 mmol, 2.5 equiv), K<sub>3</sub>PO<sub>4</sub>•H<sub>2</sub>O (46.0 mg, 0.2 mmol, 2.0 equiv) and Ph<sub>2</sub>SiD<sub>2</sub> (55.0 mg, 0.3 mmol, 3.0 equiv) were sequentially added. The mixture was stirred at room temperature for 48 h. The mixture was quenched with H<sub>2</sub>O (2.0 mL), extracted with ethyl acetate (10.0 mL), filtered through a pad of diatomite. The organic phase was dried over Na<sub>2</sub>SO<sub>4</sub>, filtered, concentrated under reduced pressure. The crude mixture was purified by flash column chromatography on silica gel using a mixture of PE: EtOAc= 8:1 as eluent to give **6** as white solid (14.0 mg, 79% yield, 90% ee). Yield was calculated based on the recovery of alkene and the deuterated ratio was confirmed by <sup>1</sup>H NMR (98% D).

<sup>1</sup>H NMR (400 MHz, Chloroform-*d*) δ 7.40 – 7.32 (m, 2H), 7.24 – 7.19 (m, 5H), 7.01 – 6.99 (m, 1H), 6.80 – 6.73 (m, 2H), 6.36 (d, *J* = 15.8 Hz, 1H), 5.85 (dd, *J* = 15.8, 8.8 Hz, 1H), 3.72 (s, 3H), 2.59 (m, 1H), 2.42 (dd, *J* = 14.4, 5.7 Hz, 1H), 2.32 (dd, *J* = 14.4, 8.3 Hz, 1H), 1.56 – 1.47 (m, 1H), 0.86 (d, *J* = 7.4 Hz, 3H).

<sup>13</sup>C NMR (101 MHz, Chloroform-*d*) δ 170.2, 159.0, 137.8, 130.7, 130.6, 130.0, 129.0, 127.3, 124.3, 120.0, 114.0, 55.3, 43.8, 41.9, 27.7 (t, *J* = 19.2 Hz), 11.6.

HRMS (ESI-TOF) Calcd for C<sub>20</sub>H<sub>23</sub>DNO<sub>2</sub> (M+H)<sup>+</sup> 311.1865. Found 311.1862.

HPLC (AD-H, 0.46\*25 cm, 5 μm, hexane/isopropanol = 90/10, flow rate = 1 mL/min, detection at 254 nm) retention time = 15.1 min (major) and 17.9 min (minor).

## 7.2 Control experiments

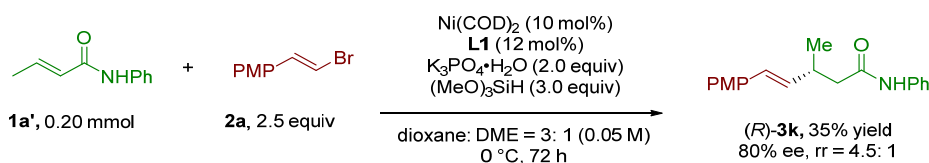

To an oven-dried 10 mL Teflon-screw cap tube containing a magnetic stir was charged with Ni(COD)<sub>2</sub> (5.5 mg, 0.02 mmol, 10 mol%) and ligand **L1** (12.0 mg, 0.024 mmol, 12 mol%) in a nitrogen-filled glove-box. Subsequently, anhydrous dioxane (3.0 mL) and DME (1.0 mL) were added, and the mixture was stirred for 15 min at room temperature. Then olefin **1a'** (350.0 mg, 0.20 mmol, 1.0 equiv), **2a** (110.0 mg, 0.50 mmol, 2.5 equiv), K<sub>3</sub>PO<sub>4</sub>•H<sub>2</sub>O (92.0 mg, 0.4 mmol, 2.0 equiv) were sequentially added. The tube was sealed and removed from the glove box and stirred at 0 °C for 10 min, then (MeO)<sub>3</sub>SiH (75.4 mg, 0.60 mmol, 3.0 equiv) added dropwise under N<sub>2</sub> atmosphere. The resulting mixture was stirred at 0 °C for 48 h. After the reaction was completed, the reaction mixture was quenched with H<sub>2</sub>O and extracted with EtOAc (3 × 20.0 mL) and the combined organic phase was concentrated in vacuum. The crude mixture was purified by flash column chromatography on silica gel using a mixture of PE: EtOAc= 10:1 as eluent to give **(R)-3k** (20.7 mg, 35% yield, 80% ee, rr = 4.5: 1).

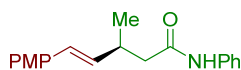

(S)-**3k**

# HPLC data of (S)-**3k** using L1

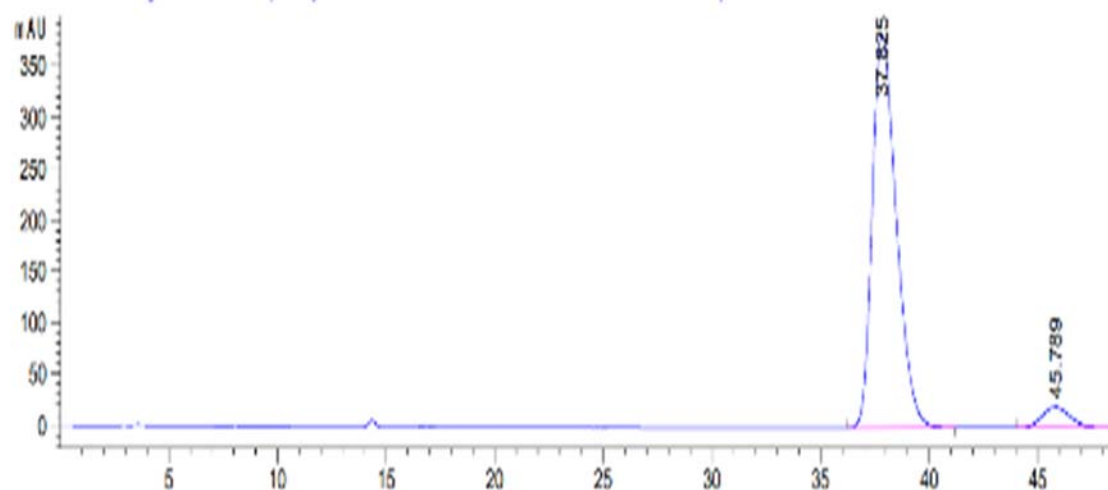

| Peak # | RetTime [min] | Type | Width [min] | Area [mAU*s] | Height [mAU] | Area %  |
|--------|---------------|------|-------------|--------------|--------------|---------|
| 1      | 37.825        | BB   | 1.1701      | 2.94184e4    | 382.13712    | 94.1948 |
| 2      | 45.789        | BB   | 1.0761      | 1813.06152   | 20.18155     | 5.8052  |

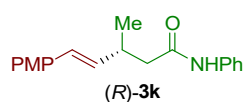

# HPLC data of (R)-**3k** using L1

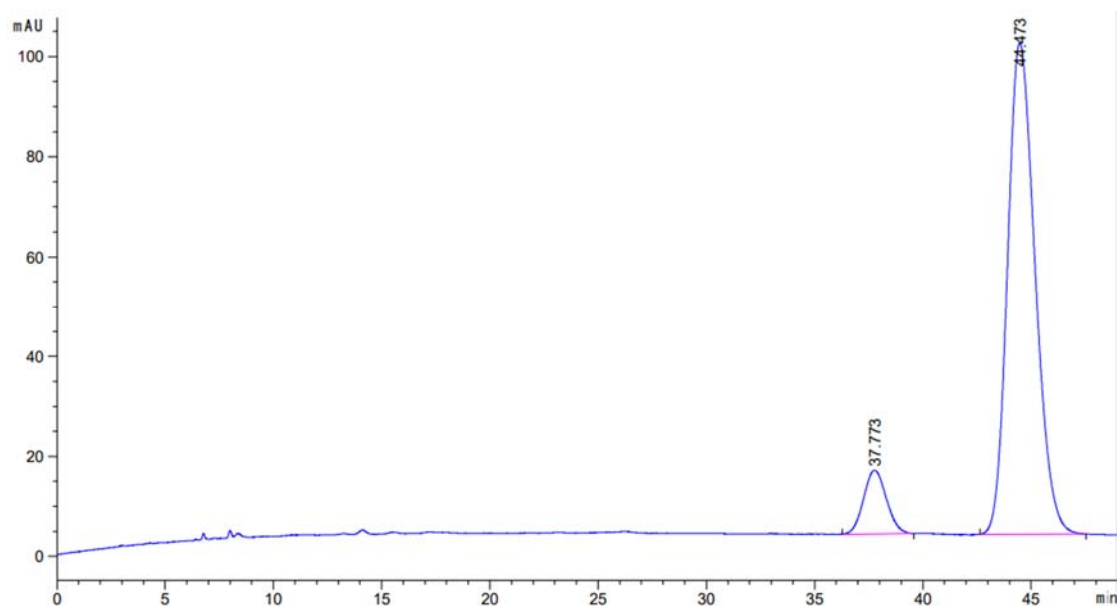

| Peak # | RetTime [min] | Type | Width [min] | Area [mAU*s] | Height [mAU] | Area %  |
|--------|---------------|------|-------------|--------------|--------------|---------|
| 1      | 37.773        | BB   | 0.9007      | 932.39642    | 12.72687     | 9.7066  |
| 2      | 44.473        | BB   | 1.3283      | 8673.40625   | 98.21320     | 90.2934 |

## VIII. Scale-up reaction and derivatization of coupling products

### 8.1 Scale-up reaction

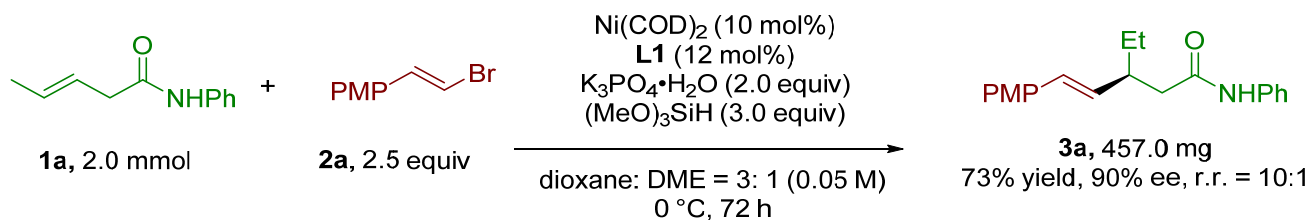

To an oven-dried 100 mL Teflon-screw cap tube containing a magnetic stir was charged with  $\text{Ni(COD)}_2$  (55.0 mg, 0.2 mmol, 10 mol%) and ligand **L1** (120.0 mg, 0.24 mmol, 12 mol%) in a nitrogen-filled glove-box. Subsequently, anhydrous dioxane (30.0 mL) and DME (10.0 mL) were added, and the mixture was stirred for 15 min at room temperature. Then olefin **1a** (350.0 mg, 2.0 mmol, 1.0 equiv), **2a** (1.1 g, 5.0 mmol, 2.5 equiv),  $\text{K}_3\text{PO}_4 \cdot \text{H}_2\text{O}$  (920.0 mg, 4.0 mmol, 2.0 equiv) were sequentially added. The tube was sealed and removed from the glove box and stirred at 0 °C for 10 min, then  $(\text{MeO})_3\text{SiH}$  (754.0 mg, 6.0 mmol, 3.0 equiv) added dropwise under  $\text{N}_2$  atmosphere. The resulting mixture was stirred at 0 °C for 72 h. After the reaction was completed, the reaction mixture was quenched with  $\text{H}_2\text{O}$  and extracted with EtOAc ( $3 \times 20.0$  mL) and the combined organic phase was concentrated in vacuum. The crude mixture was purified by flash column chromatography on silica gel using a mixture of PE: EtOAc= 10:1 as eluent to give **3a** (457.0 mg, 73% yield, 90% ee).

### 8.2 Derivatization of coupling products

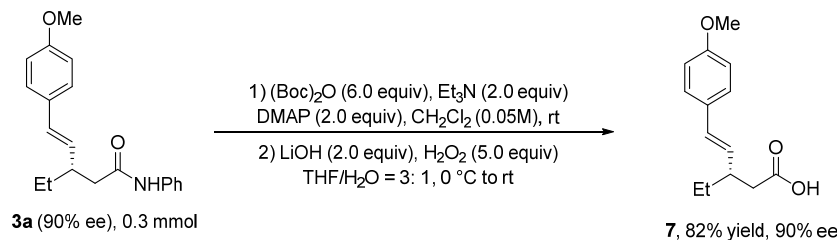

Following literature procedure,<sup>5,6</sup> to a solution of **3a** (93.0 mg, 0.3 mmol, 1.0 equiv) in dry DCM (20.0 mL) was added triethylamine (64.2 mg, 0.6 mmol, 2.0 equiv),  $(\text{Boc})_2\text{O}$  (261.6 mg, 1.2 mmol, 6.0 equiv) and DMAP (48.8 mg, 0.4 mmol, 2.0 equiv), the resulting reaction mixture was stirred at room temperature for 2 h. The resulting solution was quenched with water (30.0 mL). The aqueous layer was extracted with DCM ( $2 \times 30.0$  mL). The combined organic phase was washed with brine, dried over  $\text{Na}_2\text{SO}_4$ , and concentrated. The crude product was purified on flash column to afford the product.

A round-bottom flask equipped with a magnetic stirring bar was charged with 0.05 M solution of the product obtained above (82.0 mg, 0.20 mmol, 1.0 equiv) in THF:  $\text{H}_2\text{O}$  = 3:1. The solution was cooled to 0 °C followed by adding 30% (by wt.) aqueous solution of  $\text{H}_2\text{O}_2$  (113.3 mg, 1.0 mmol, 5.0 equiv) and  $\text{LiOH}$  (9.6 mg, 0.40 mmol, 2.0 equiv). The mixture was warmed slowly to room temperature and stirred for 3 h until completion as judged by TLC analysis. The reaction was cooled to 0 °C and treated with 1.5 N aqueous solution of  $\text{Na}_2\text{SO}_3$  (1.1 equiv). The mixture was stirred for 5 min at room temperature and was diluted with

H<sub>2</sub>O. The mixture was extracted with CH<sub>2</sub>Cl<sub>2</sub> to remove HN(Boc)Ph. The remaining basic aqueous layer was acidified to pH = 4 and extracted with CH<sub>2</sub>Cl<sub>2</sub>. The organic layer was concentrated in vacuum and chromatographed on a silica column (PE: EtOAc = 1:1) to afford **7** as white solid (39.0 mg, 82% yield, 91% ee). (ee value was determined by corresponding arylamide). **<sup>1</sup>H NMR** (600 MHz, Chloroform-*d*) δ 7.28 (d, *J* = 8.7 Hz, 2H), 6.84 (d, *J* = 8.7 Hz, 2H), 6.37 (d, *J* = 15.8 Hz, 1H), 5.87 (dd, *J* = 15.8, 8.6 Hz, 1H), 3.80 (s, 3H), 2.61 – 2.55 (m, 1H), 2.48 (dd, *J* = 15.0, 6.4 Hz, 1H), 2.41 (dd, *J* = 15.0, 8.0 Hz, 1H), 1.60 – 1.52 (m, 1H), 1.46 – 1.40 (m, 1H), 0.92 (t, *J* = 7.4 Hz, 3H). **<sup>13</sup>C NMR** (151 MHz, Chloroform-*d*) δ 178.3, 159.0, 130.33, 130.27, 130.25, 127.4, 114.1, 55.4, 41.3, 40.0, 27.9, 11.7. **HRMS (ESI-TOF)** Calcd for C<sub>14</sub>H<sub>19</sub>O<sub>3</sub> (M+H)<sup>+</sup> 235.1329. Found 235.1333. HPLC trace was obtained by the corresponding arylamide. **HPLC** (AD-H, 0.46\*25 cm, 5 μm, hexane/isopropanol = 90/10, flow rate = 1 mL/min, detection at 254 nm) retention time = 14.9 min (major) and 17.7 min (minor).

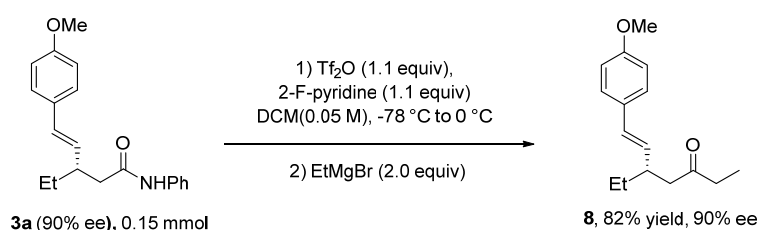

Following literature procedure,<sup>7</sup> to a flame-dried and nitrogen-flushed 10 mL round-bottom flask equipped with a stir bar and a septum was added **3a** (46.5 mg, 0.15 mmol, 1.0 equiv), anhydrous DCM (3.0 mL), and 2-fluoropyridine (16.5 mg, 0.17 mmol, 1.1 equiv). The solution was then cooled to –78 °C and stirred for 2 min. Tf<sub>2</sub>O (48.0 mg, 0.17 mmol, 1.1 equiv) was added dropwise using a syringe at –78 °C and the reaction was stirred for 15 min. The solution was warmed to 0 °C and stirred for 15 min. EtMgBr (0.3 mmol, 150.0 μL, 2.0 equiv, 2.0 M in Et<sub>2</sub>O) was added in one portion to the reaction at 0 °C, and the reaction was stirred for 25 min at 0 °C. The reaction was quenched by the addition of 1.6 mL of an aqueous solution of HCl (0.5 M). The biphasic mixture was gently heated to 65 °C (keeping the flask ventilated for DCM evaporation) for 2 h to ensure complete hydrolysis to the ketone. The aqueous layer was extracted with EtOAc (2 × 10.0 mL) and the organic layers were combined. The organic layer was dried over anhydrous Na<sub>2</sub>SO<sub>4</sub>, filtered and evaporated to dryness. The ketones were purified by column chromatography on silica gel (PE: EtOAc = 30:1) to provide the title compound **8** as a colorless oil (30.2 mg, 82% yield, 90% ee). **<sup>1</sup>H NMR** (400 MHz, Chloroform-*d*) δ 7.30 – 7.23 (m, 2H), 6.85 – 6.83 (m, 2H), 6.32 (d, *J* = 15.8 Hz, 1H), 5.84 (dd, *J* = 15.8, 8.6 Hz, 1H), 3.80 (d, *J* = 1.2 Hz, 3H), 2.63 (m, 1H), 2.50 (d, *J* = 7.1 Hz, 2H), 2.41 (q, *J* = 7.3 Hz, 2H), 1.49 (m, 1H), 1.36 (m, 1H), 1.02 (t, *J* = 7.3 Hz, 3H), 0.90 (t, *J* = 7.4 Hz, 3H). **<sup>13</sup>C NMR** (151 MHz, Chloroform-*d*) δ 210.9, 158.9, 131.0, 130.3, 129.7, 127.2, 113.9, 55.3, 48.1, 40.7, 36.8, 28.1, 11.7, 7.7. **HRMS (ESI-TOF)** Calcd for C<sub>16</sub>H<sub>23</sub>O<sub>2</sub> (M+H)<sup>+</sup> 247.1693. Found 247.1698. **HPLC** (AD-H, 0.46\*25 cm, 5 μm, hexane/isopropanol = 90/10, flow rate = 1 mL/min, detection at 254 nm) retention time = 4.6 min (major) and 5.0 min (minor).

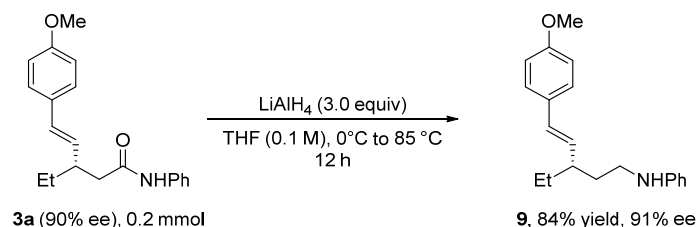

Following literature procedure,<sup>8</sup> lithium aluminum hydride (23.0 mg, 1.0 M in Et<sub>2</sub>O, 3.0 equiv) was added dropwise to a solution of **3a** (62.0 mg, 0.2 mmol, 1.0 equiv) in THF (2.0 mL) at 0 °C in a 10-mL Schlenk tube. Next, the reaction mixture was allowed to warm to room temperature, and then it was heated to 85 °C. After being stirred at 85 °C in the sealed Schlenk tube overnight, the reaction mixture was diluted with Et<sub>2</sub>O (10.0 mL) and cooled to 0 °C. The reaction was then quenched in turn with H<sub>2</sub>O (36.0 mg, 0.2 mmol, 1.0 equiv), 15% aqueous NaOH (36.0 mg, 0.2 mmol, 1.0 equiv), and H<sub>2</sub>O (108 mg, 0.6 mmol, 3.0 equiv). Next, the suspension was filtered through a sintered funnel to remove the white solid. The combined organic layers were dried (Na<sub>2</sub>SO<sub>4</sub>), filtered, and concentrated under reduced pressure. The residue was purified by flash chromatography on silica gel (PE/EtOAc = 10:1) to afford the pure product **9** as colorless oil (50.0 mg, 84% yield, 91% ee). <sup>1</sup>H NMR (400 MHz, Chloroform-*d*) δ 7.20 (d, *J* = 8.7 Hz, 2H), 7.08 – 7.04 (m, 2H), 6.76 (d, *J* = 8.7 Hz, 2H), 6.61 – 6.57 (m, 1H), 6.51 – 6.49 (m, 2H), 6.24 (d, *J* = 15.8 Hz, 1H), 5.75 (dd, *J* = 15.8, 9.0 Hz, 1H), 3.69 (s, 3H), 3.13 – 2.96 (m, 2H), 2.11 – 2.02 (m, 1H), 1.72 – 1.64 (m, 1H), 1.58 – 1.47 (m, 1H), 1.47 – 1.37 (m, 1H), 1.34 – 1.24 (m, 1H), 0.81 (t, *J* = 7.4 Hz, 3H). <sup>13</sup>C NMR (101 MHz, Chloroform-*d*) δ 158.9, 148.4, 132.3, 130.5, 129.9, 129.3, 127.2, 117.2, 114.0, 112.9, 55.4, 43.3, 42.4, 35.0, 28.6, 11.9. HRMS (ESI-TOF) Calcd for C<sub>20</sub>H<sub>26</sub>NO (M+H)<sup>+</sup> 296.2009. Found 296.2015. HPLC (AD-H, 0.46\*25 cm, 5 μm, hexane/isopropanol = 90/10, flow rate = 1 mL/min, detection at 254 nm) retention time = 7.3 min (major) and 8.0 min (minor).

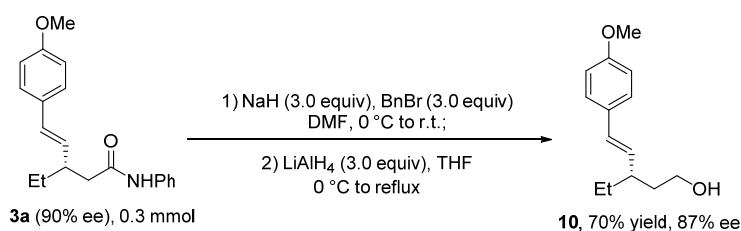

Following literature procedure,<sup>9</sup> a solution of **3a** (93.0 mg, 0.3 mmol, 1.0 equiv) in dry DMF (3.0 mL) was added into a suspension of NaH (60% dispersion in mineral oil, 18.0 mg, 0.6 mmol) in dry DMF (1.0 mL) at 0 °C (in an ice-water bath). After stirring the resulting solution for 15 min, benzyl bromide (150.0 mg, 0.9 mmol, 3.0 equiv) was added dropwise. The ice bath was then removed, and the reaction mixture was stirred at room temperature monitored by TLC analysis (3 h). Then DMF was removed under reduced pressure, and the resulting yellow residual was treated with water (20.0 mL) and extracted with ethyl acetate (3 × 20 mL). The combined organic layer was dried over anhydrous sodium sulfate, and the volatile components were removed under reduced pressure. The residual was treated with silica gel column chromatography (PE: EtOAc = 8: 1) to give the pure product.

Lithium aluminum hydride (23.0 mg, 1.0 M in Et<sub>2</sub>O, 3.0 equiv) was added dropwise to a solution of the product obtained above (80.0 mg, 0.2 mmol, 1.0 equiv) in THF (2.0 mL) at 0 °C in a 10-mL Schlenk tube. Next, the reaction mixture was allowed to warm to room temperature, and then it was heated to 85 °C. After being stirred at 85 °C in the sealed Schlenk tube overnight, the reaction mixture was diluted with Et<sub>2</sub>O (10.0 mL) and cooled to 0 °C. The reaction was then quenched in turn with H<sub>2</sub>O (38.0 μL), 15% aqueous NaOH (38 μL), and H<sub>2</sub>O (114.0 μL). Next, the suspension was filtered through a sintered funnel to remove the white solid. The combined organic layers were dried (Na<sub>2</sub>SO<sub>4</sub>), filtered, and concentrated under reduced pressure. The residue was purified by flash chromatography on silica gel (PE: EtOAc = 10:1) to afford the pure product **10** as colorless oil (31.0 mg, 69% yield, 87% ee). **<sup>1</sup>H NMR** (400 MHz, Chloroform-*d*) δ 7.29 (d, *J* = 8.7 Hz, 2H), 6.84 (d, *J* = 8.7 Hz, 2H), 6.33 (d, *J* = 15.8 Hz, 1H), 5.82 (dd, *J* = 15.8, 9.1 Hz, 1H), 3.80 (s, 3H), 3.74 – 3.61 (m, 2H), 2.19 – 2.09 (m, 1H), 1.81 – 1.71 (m, 1H), 1.66 – 1.53 (m, 2H), 1.41 – 1.34 (m, 2H), 0.90 (t, *J* = 7.4 Hz, 3H). **<sup>13</sup>C NMR** (101 MHz, Chloroform-*d*) δ 158.9, 132.5, 130.5, 129.8, 127.2, 114.1, 61.6, 55.5, 42.2, 38.2, 28.7, 11.9. **HRMS (ESI-TOF)** Calcd for C<sub>14</sub>H<sub>21</sub>O<sub>2</sub> (M+H)<sup>+</sup> 221.1536. Found 221.1541. **HPLC** (AD-H, 0.46\*25 cm, 5 μm, hexane/isopropanol = 90/10, flow rate = 1 mL/min, detection at 254 nm) retention time = 6.6 min (major) and 7.2 min (minor).

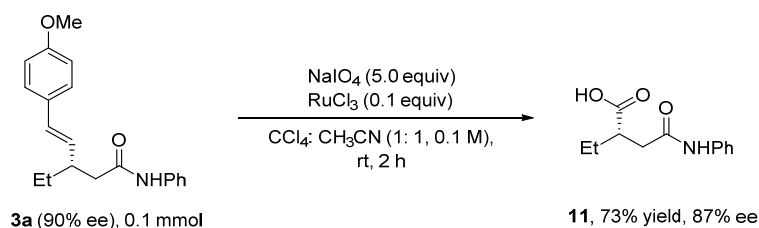

Following literature procedure,<sup>10</sup> olefin **3a** (31.0 mg, 0.1 mmol, 1.0 equiv) and NaIO<sub>4</sub> (107.0 mg, 0.5 mmol) in a 1:1 mixture of CCl<sub>4</sub> and CH<sub>3</sub>CN (2.0 mL). Add a solution of RuCl<sub>3</sub> (1.0 mg, 0.001 mol) in H<sub>2</sub>O (1.0 mL) to the flask. Stir the reaction mixture vigorously. After completion of the reaction (2.0 hour), add EtOAc (20.0 mL) and NaHCO<sub>3</sub> (saturated aqueous solution, 20.0 mL) to the reaction. Extract the organic phase with NaHCO<sub>3</sub> (saturated aqueous solution, 4 × 10.0 mL). The combined aqueous phase was acidified with concentrated HCl aq. until pH value reached 2, which was extracted with EtOAc (4 × 10.0 mL). The combined organic phase was dried over Na<sub>2</sub>SO<sub>4</sub> and concentrated in vacuo. The residue was purified by flash chromatography on silica gel (PE: EtOAc: CH<sub>3</sub>COOH = 80: 20: 1) to afford the pure product **11** as white solid (16.0 mg, 73% yield, 90% ee). (ee value was determined by corresponding methyl ester). **<sup>1</sup>H NMR** (400 MHz, Acetonitrile-*d*<sub>3</sub>) δ 9.50 (s, 1H), 8.40 (s, 1H), 7.53 (d, *J* = 7.8 Hz, 2H), 7.30 (t, *J* = 7.8 Hz, 2H), 7.09 – 7.05 (m, 1H), 2.88 – 2.73 (m, 1H), 2.66 (dd, *J* = 15.6, 9.0 Hz, 1H), 2.49 (dd, *J* = 15.6, 4.9 Hz, 1H), 1.59 – 1.52 (m, 1H), 1.46 – 1.41 (m, 1H), 0.93 (t, *J* = 7.5 Hz, 3H). **<sup>13</sup>C NMR** (101 MHz, Acetonitrile-*d*<sub>3</sub>) δ 175.5, 170.0, 138.4, 128.5, 123.4, 119.1, 42.0, 37.3, 24.3, 10.4. **HRMS (ESI-TOF)** Calcd for C<sub>12</sub>H<sub>16</sub>NO<sub>3</sub> (M+H)<sup>+</sup> 222.1125. Found 222.1131. **HPLC** (AD-H, 0.46\*25 cm, 5 μm, hexane/isopropanol = 85/15, flow rate = 1 mL/min, detection at 254 nm) retention time = 6.4 min (major) and 7.4 min (minor).

## IX. X-Ray diffraction data of 4q

X-ray structure of 4q (CCDC 2131923)

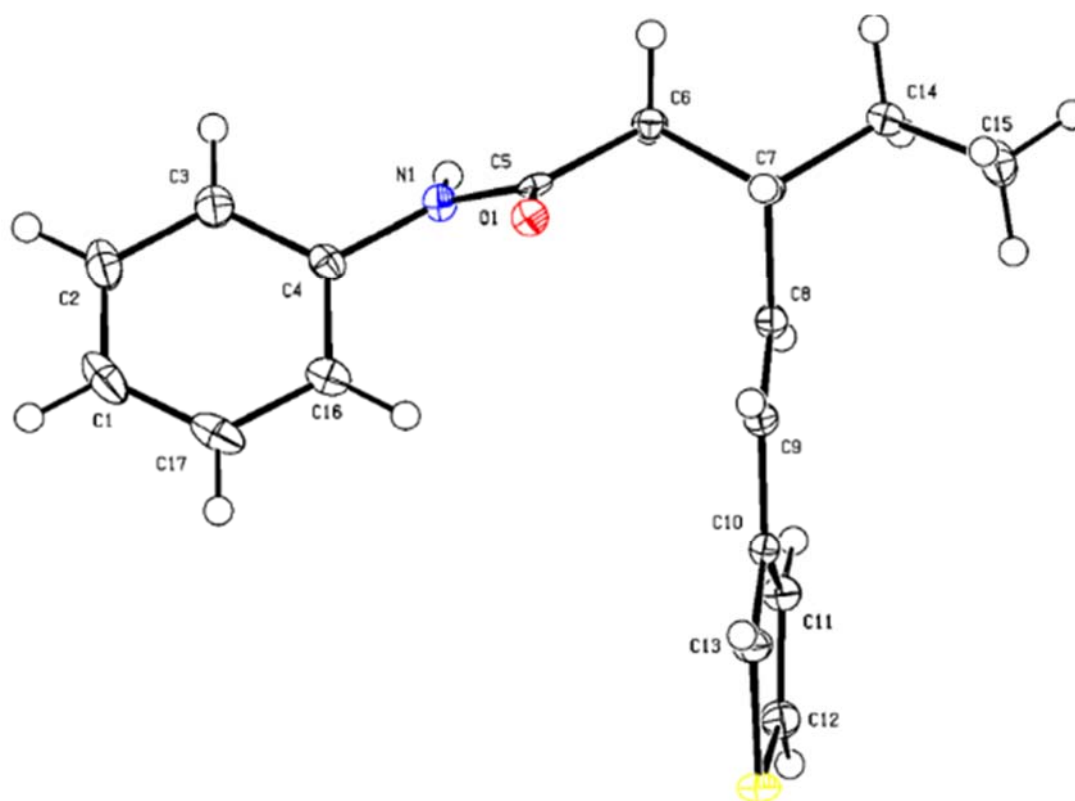

**Table S8.**Crystal data and structure refinement for cxy3456\_0m (4q)

|                                    |                                     |
|------------------------------------|-------------------------------------|
| Identification code                | cxy3456_0m                          |
| Empirical formula                  | C <sub>17</sub> H <sub>19</sub> NOS |
| Formula weight                     | 285.39                              |
| Temperature/K                      | 100.0                               |
| Crystal system                     | monoclinic                          |
| Space group                        | P2 <sub>1</sub>                     |
| a/Å                                | 8.8663(14)                          |
| b/Å                                | 8.7930(14)                          |
| c/Å                                | 10.1594(16)                         |
| α/°                                | 90                                  |
| β/°                                | 108.871(5)                          |
| γ/°                                | 90                                  |
| Volume/Å <sup>3</sup>              | 749.5(2)                            |
| Z                                  | 2                                   |
| ρ <sub>calc</sub> /cm <sup>3</sup> | 1.265                               |

|                                                |                                                               |
|------------------------------------------------|---------------------------------------------------------------|
| $\mu/\text{mm}^{-1}$                           | 1.865                                                         |
| F(000)                                         | 304.0                                                         |
| Crystal size/ $\text{mm}^3$                    | $0.42 \times 0.42 \times 0.38$                                |
| Radiation                                      | $\text{CuK}\alpha$ ( $\lambda = 1.54178$ )                    |
| $2\Theta$ range for data collection/ $^\circ$  | 9.198 to 136.874                                              |
| Index ranges                                   | $-10 \leq h \leq 10, -10 \leq k \leq 10, -12 \leq l \leq 12$  |
| Reflections collected                          | 11797                                                         |
| Independent reflections                        | 2740 [ $R_{\text{int}} = 0.0341, R_{\text{sigma}} = 0.0297$ ] |
| Data/restraints/parameters                     | 2740/1/183                                                    |
| Goodness-of-fit on $F^2$                       | 1.062                                                         |
| Final R indexes [ $I \geq 2\sigma(I)$ ]        | $R_1 = 0.0261, wR_2 = 0.0657$                                 |
| Final R indexes [all data]                     | $R_1 = 0.0262, wR_2 = 0.0658$                                 |
| Largest diff. peak/hole / $e \text{ \AA}^{-3}$ | 0.25/-0.18                                                    |
| Flack parameter                                | -0.001(7)                                                     |

## X. References

1. Zheng, H.; Doyle, M. P. *Angew. Chem. Int. Ed.* **2019**, *58*, 12502-12506.
2. Tsutsumi, K.; Itagaki, K.; Nomura, K. *ACS Omega* **2017**, *2*, 3886-3900.
3. Zhao, H.; Gao, Q.; Zhang, Y.; Zhang, P.; Xu, S. *Org. Lett.* **2020**, *22*, 2861-2866.
4. Yu, X.; Zheng, H.; Zhao, H.; Lee, B. C.; Koh, M. J. *Angew. Chem. Int. Ed.* **2021**, *60*, 2104-2109.
5. Sharma, P.; Liu, R. S. *Org. Lett.* **2016**, *18*, 412-415.
6. Evans, D. A.; Aye, Y.; Wu, J. *Org. Lett.* **2006**, *8*, 2071-2073.
7. Wang, J.; Yu, W. *Org. Lett.* **2019**, *21*, 9236-9240.
8. Norinder, J.; Bogár, K.; Kanupp, L.; Bäckvall, J. E. *Org. Lett.* **2007**, *24*, 5095-5098.
9. Musacchio, A. J.; Nguyen, L. Q.; Beard, G. H.; Knowles, R. R. *J. Am. Chem. Soc.* **2014**, *35*, 12217-12220.
10. Zhou, F.; Zhu, S.-L. *ACS Catal.* **2021**, *11*, 8766-8773.
11. Wang, D.-P.; Dong, J.; Fan, W.-J.; Yuan, X.-A.; Han, J.; Xie, J. *Angew. Chem. Int. Ed.* **2020**, *59*, 8430-8434.



# XI. $^1\text{H}$ NMR, $^{13}\text{C}$ NMR and $^{19}\text{F}$ NMR spectra

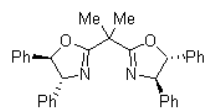

$^1\text{H}$  NMR (400 MHz,  $\text{CDCl}_3$ )

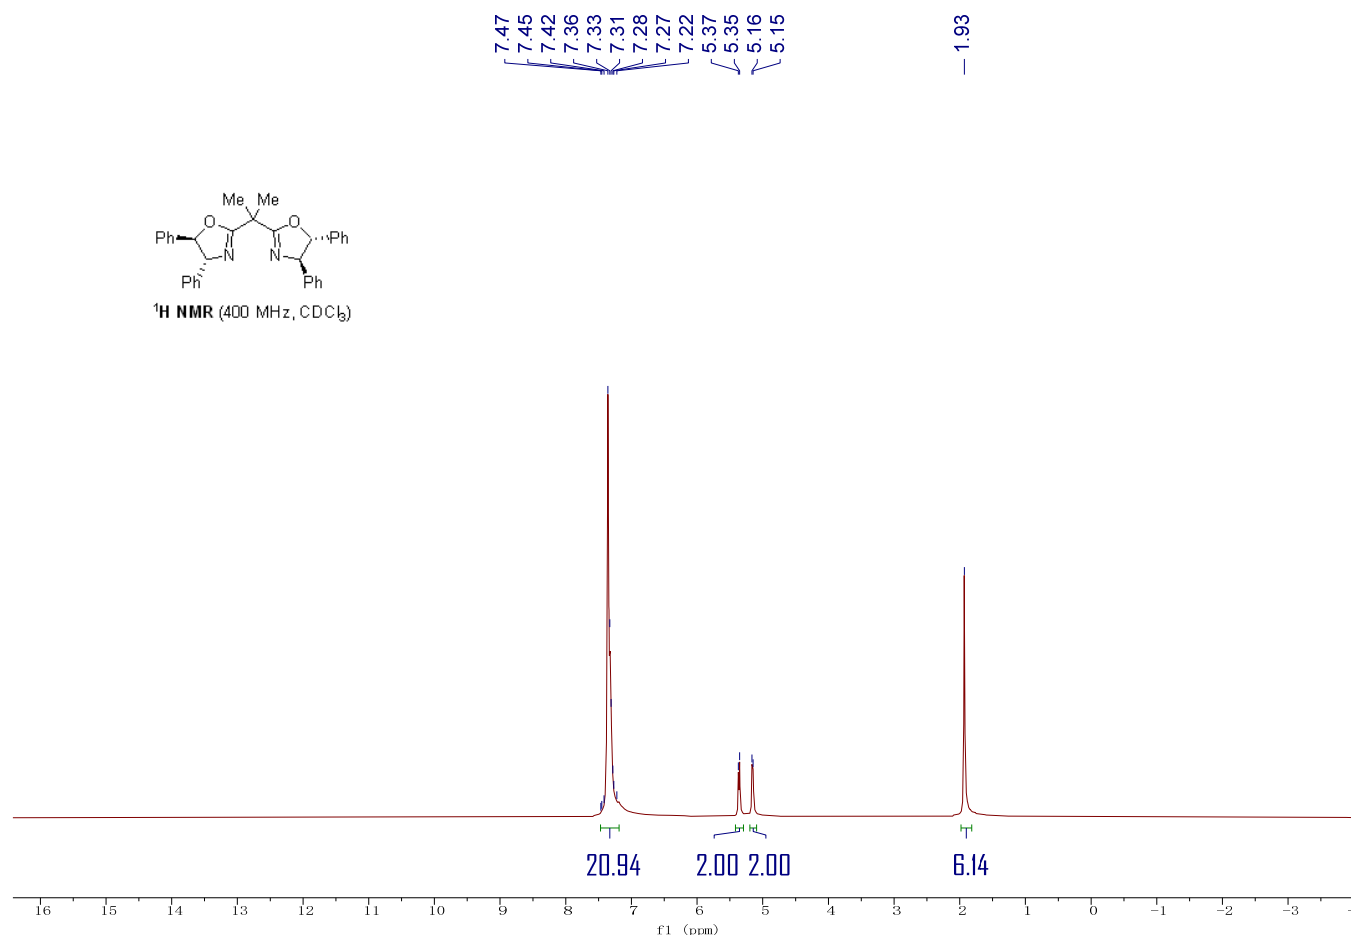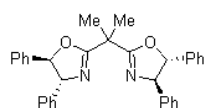

$^{13}\text{C}$  NMR (101 MHz,  $\text{CDCl}_3$ )

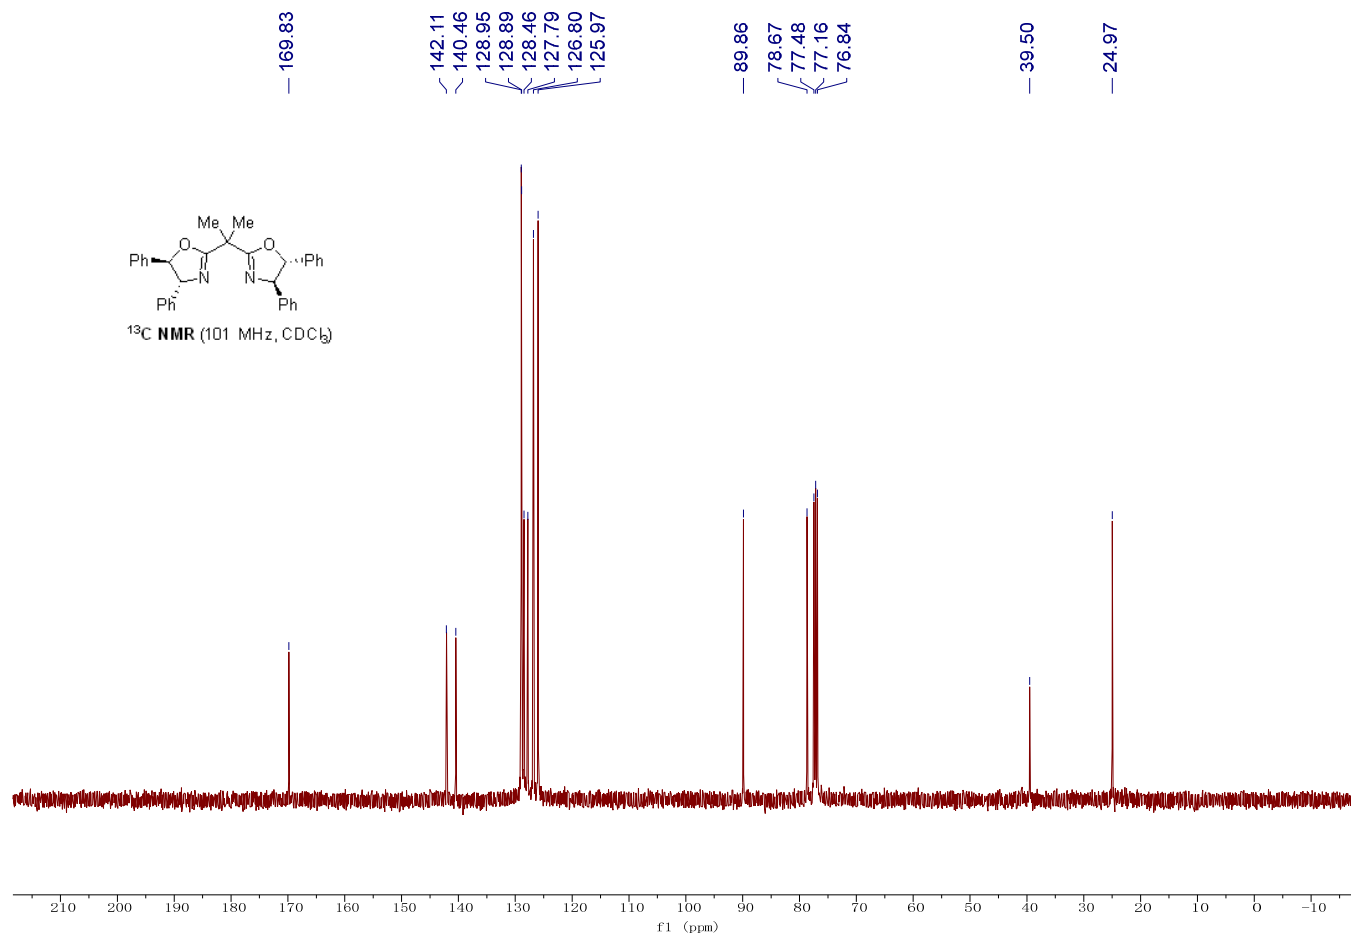

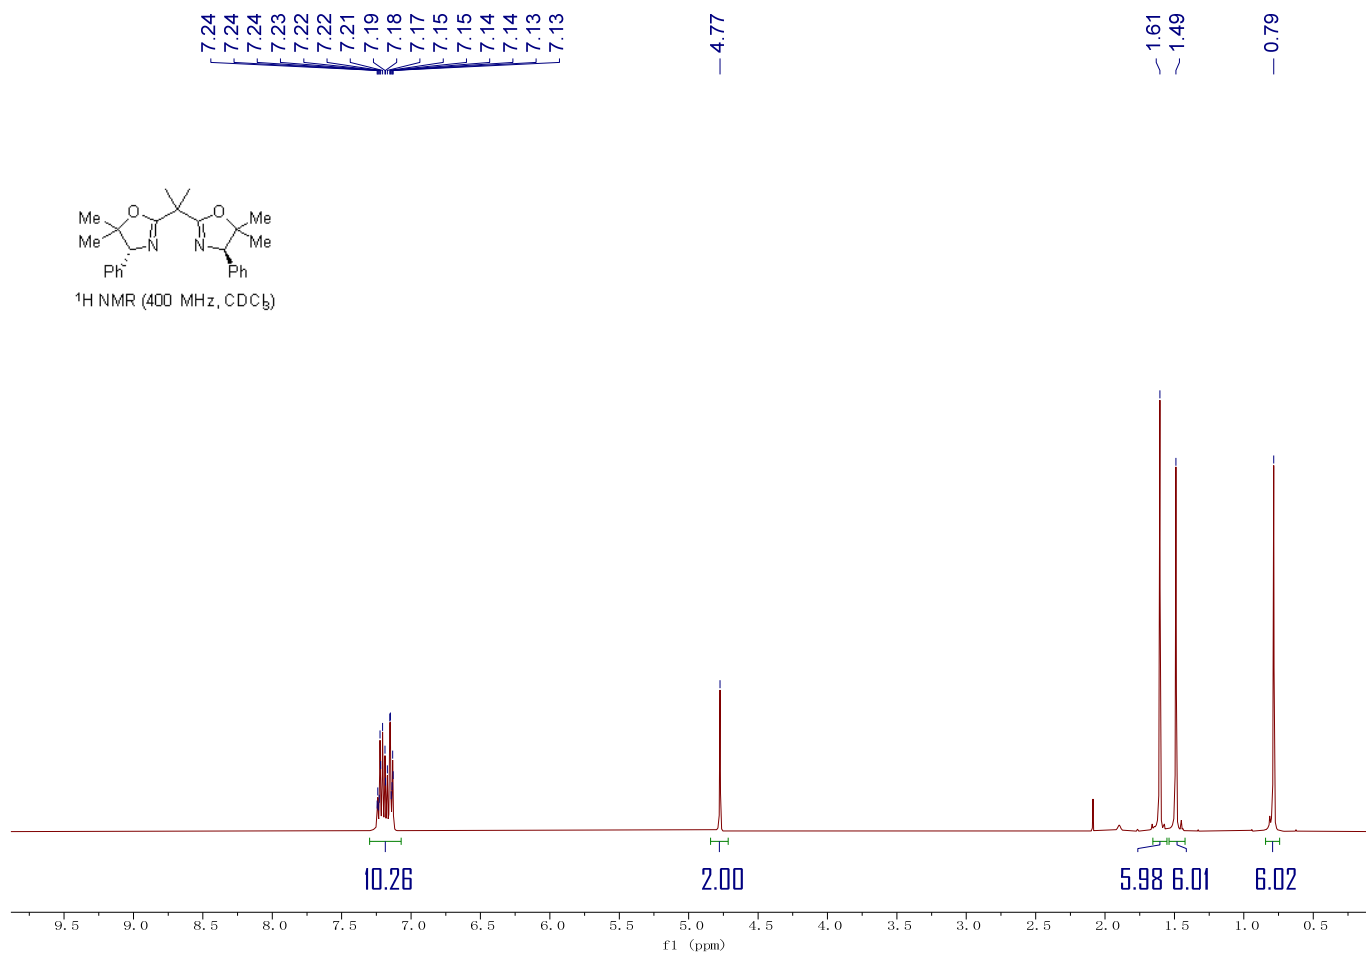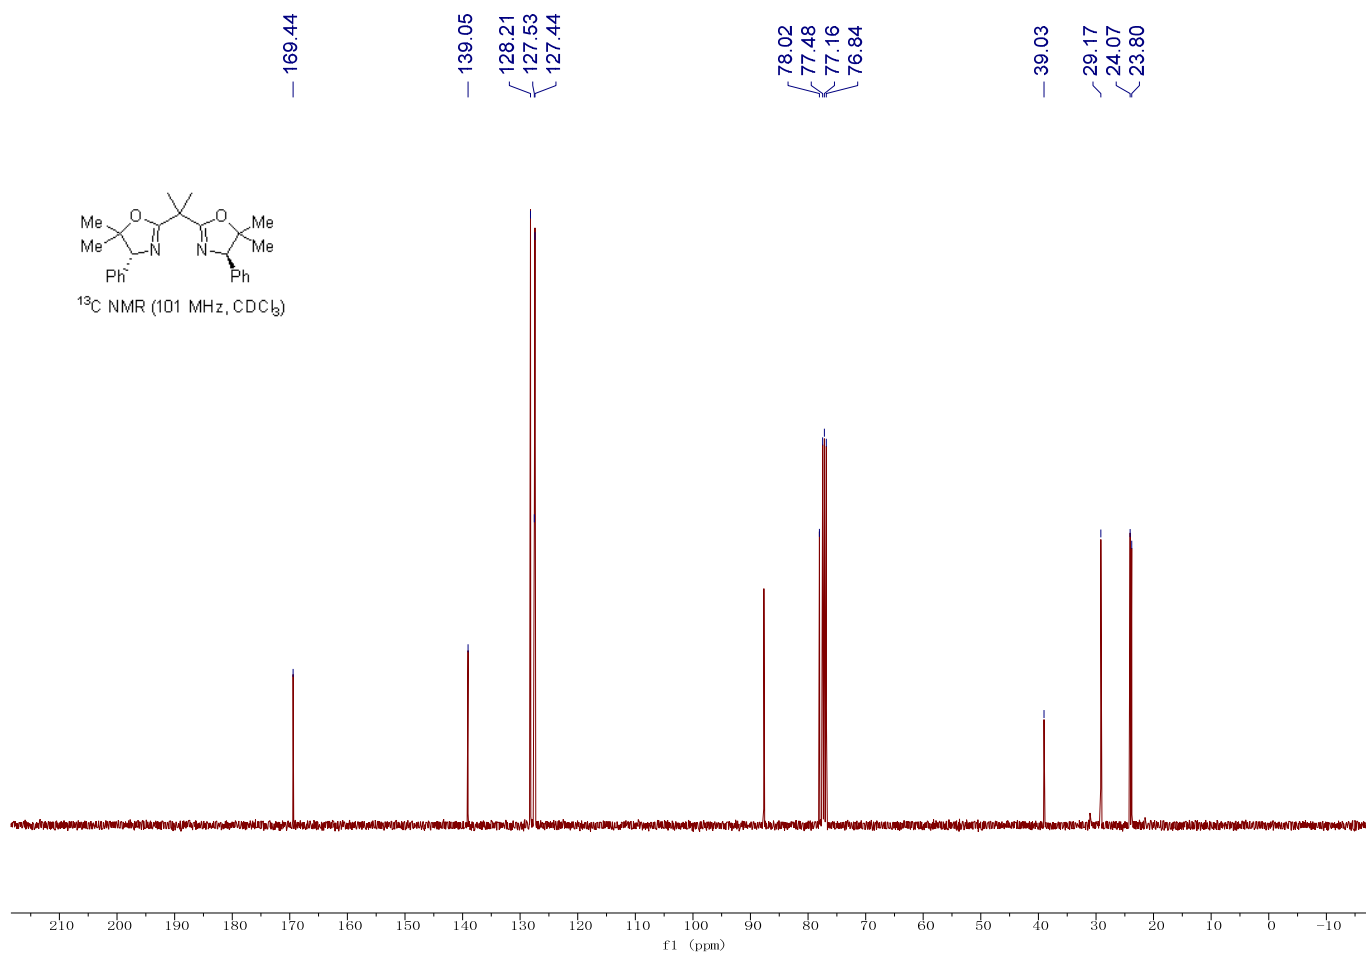

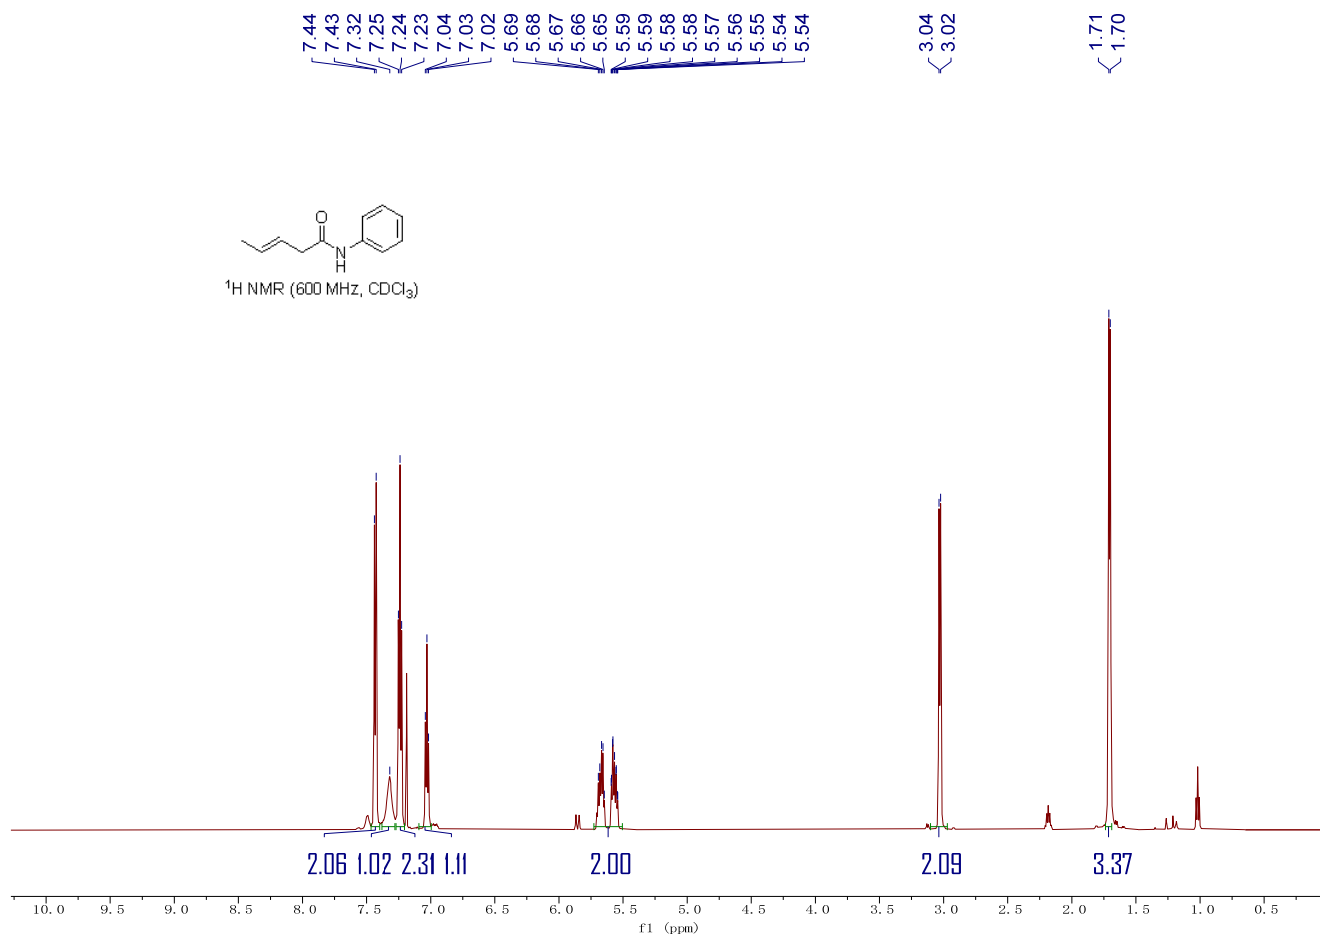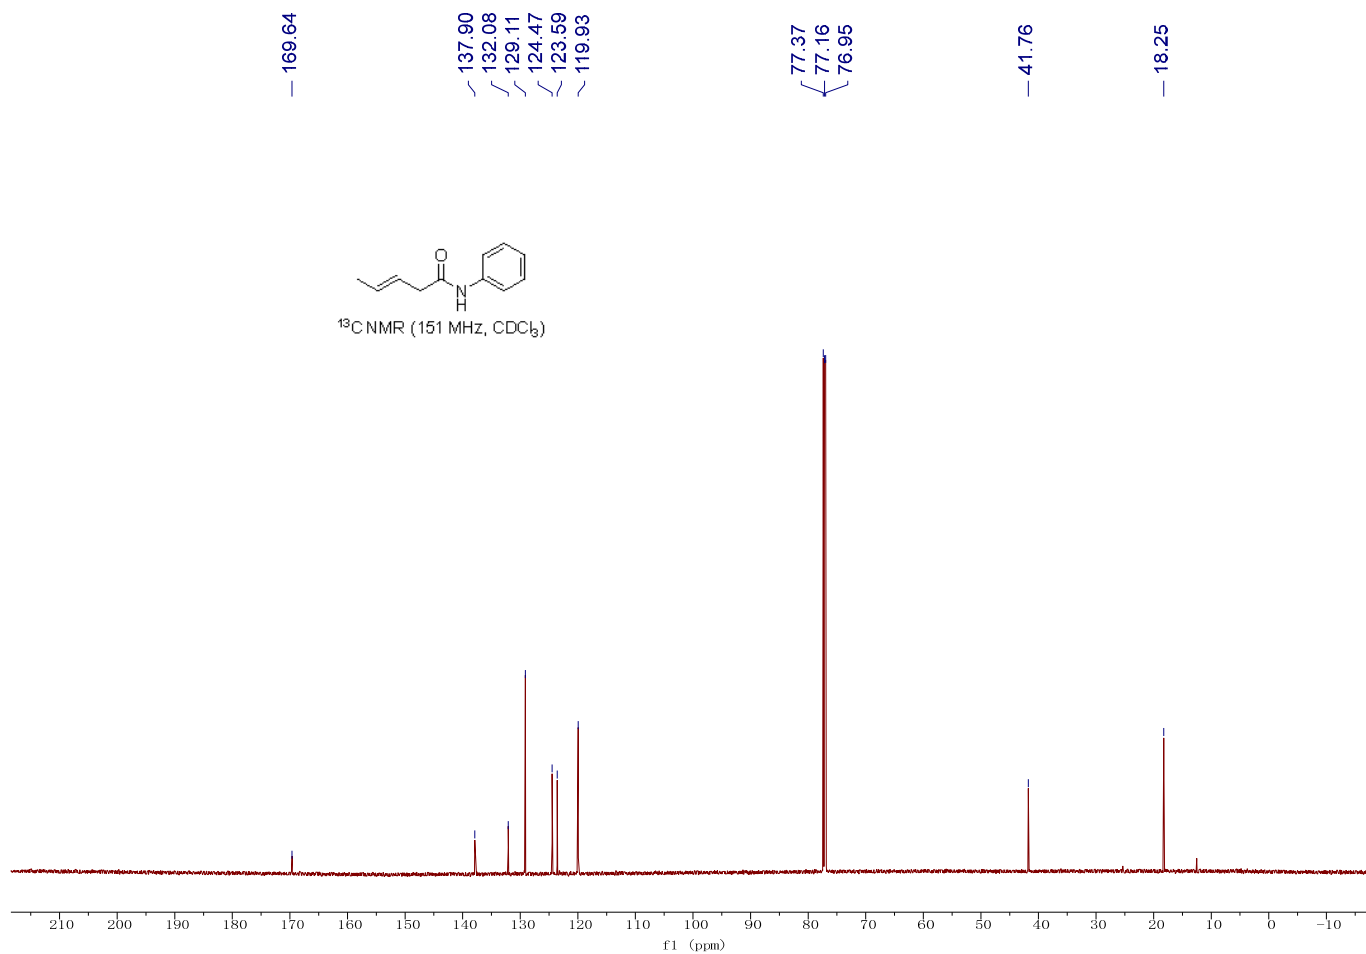

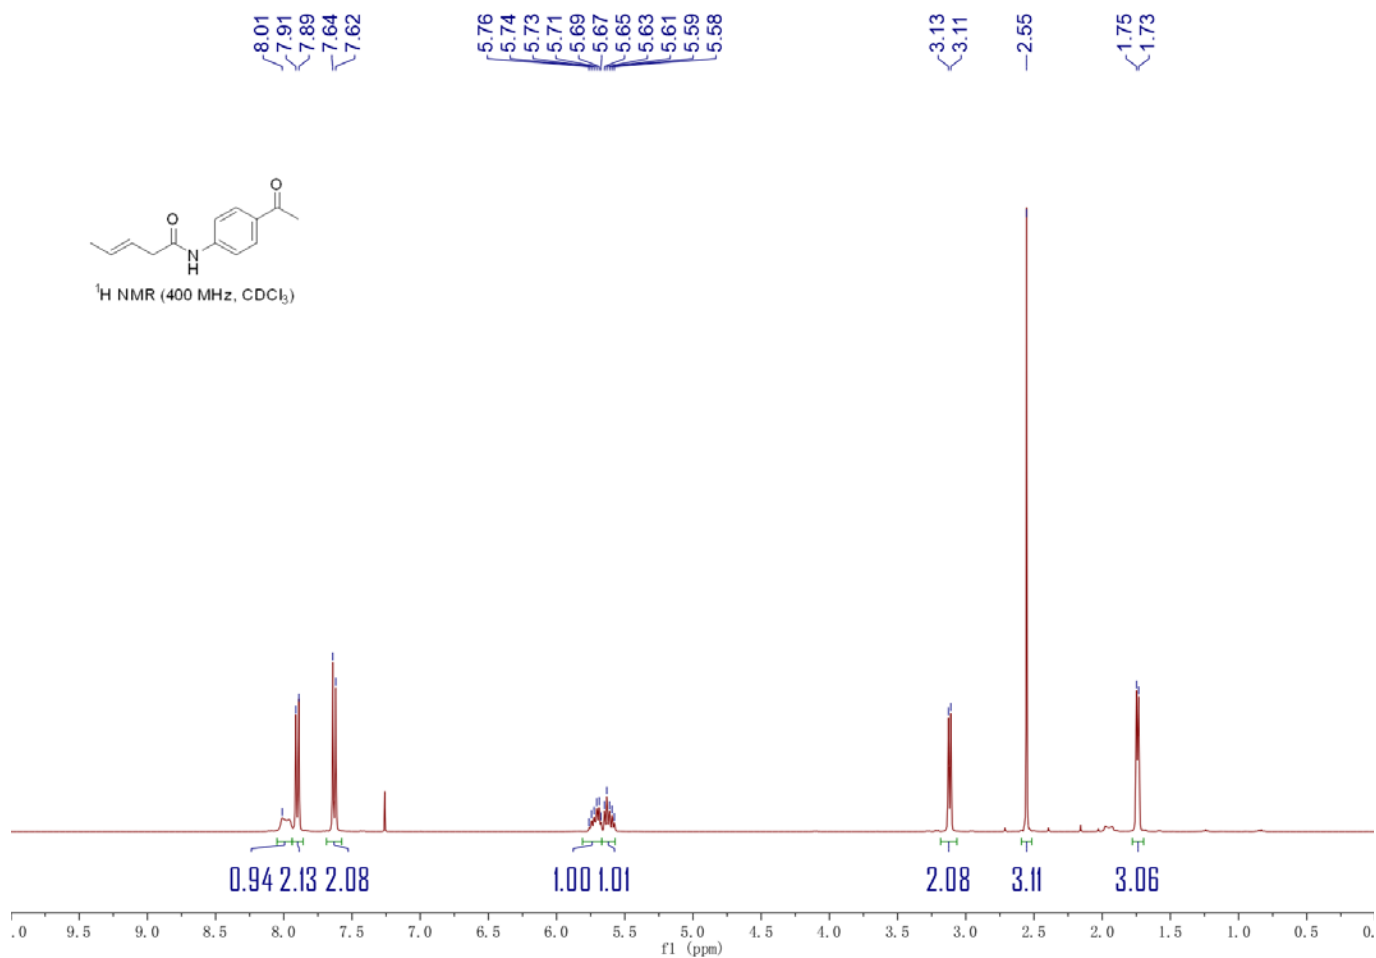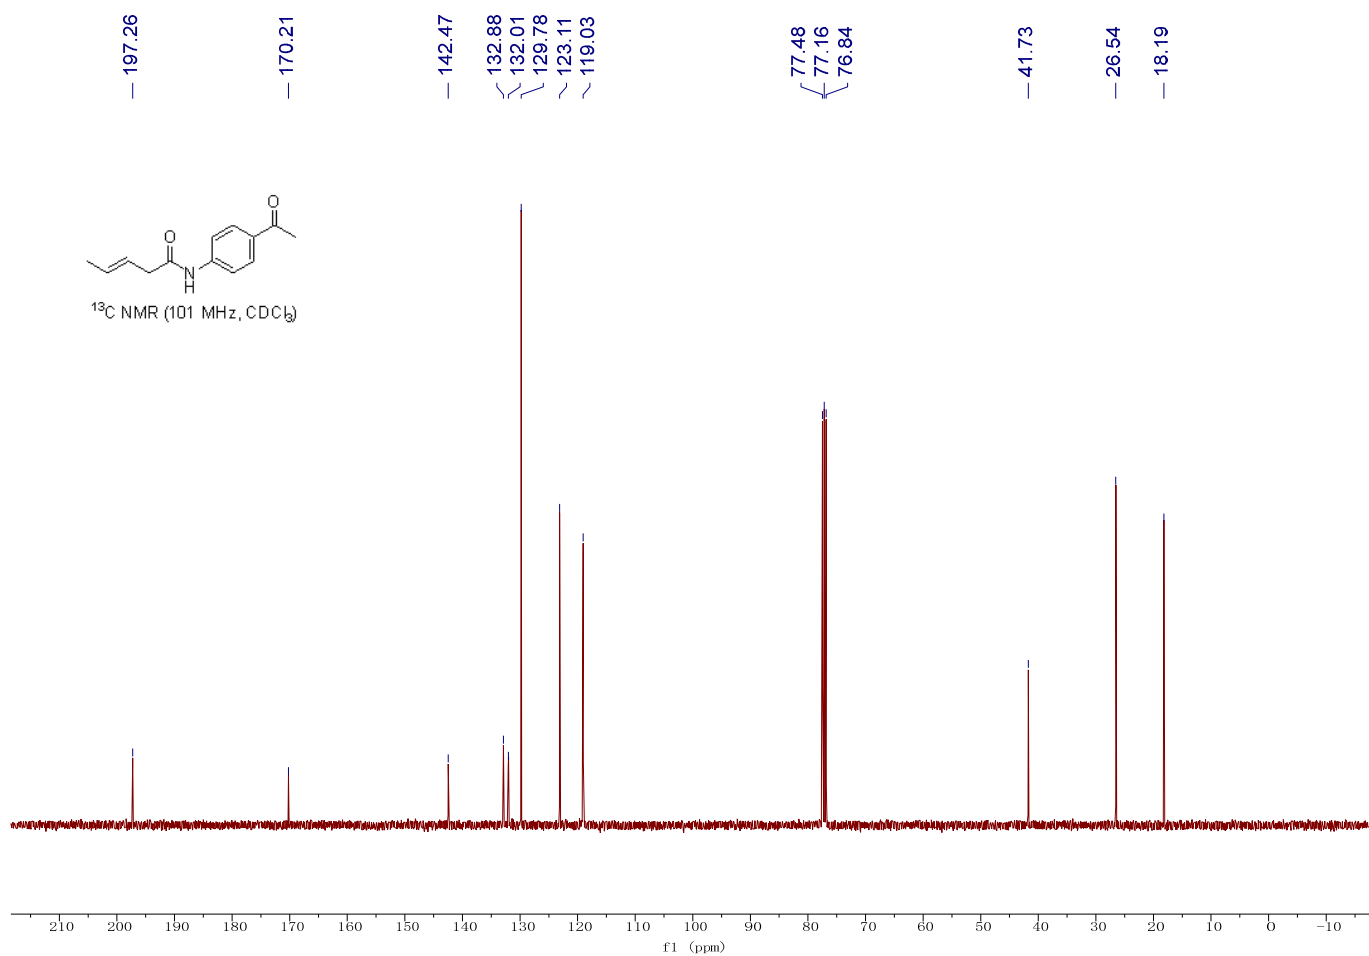

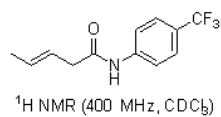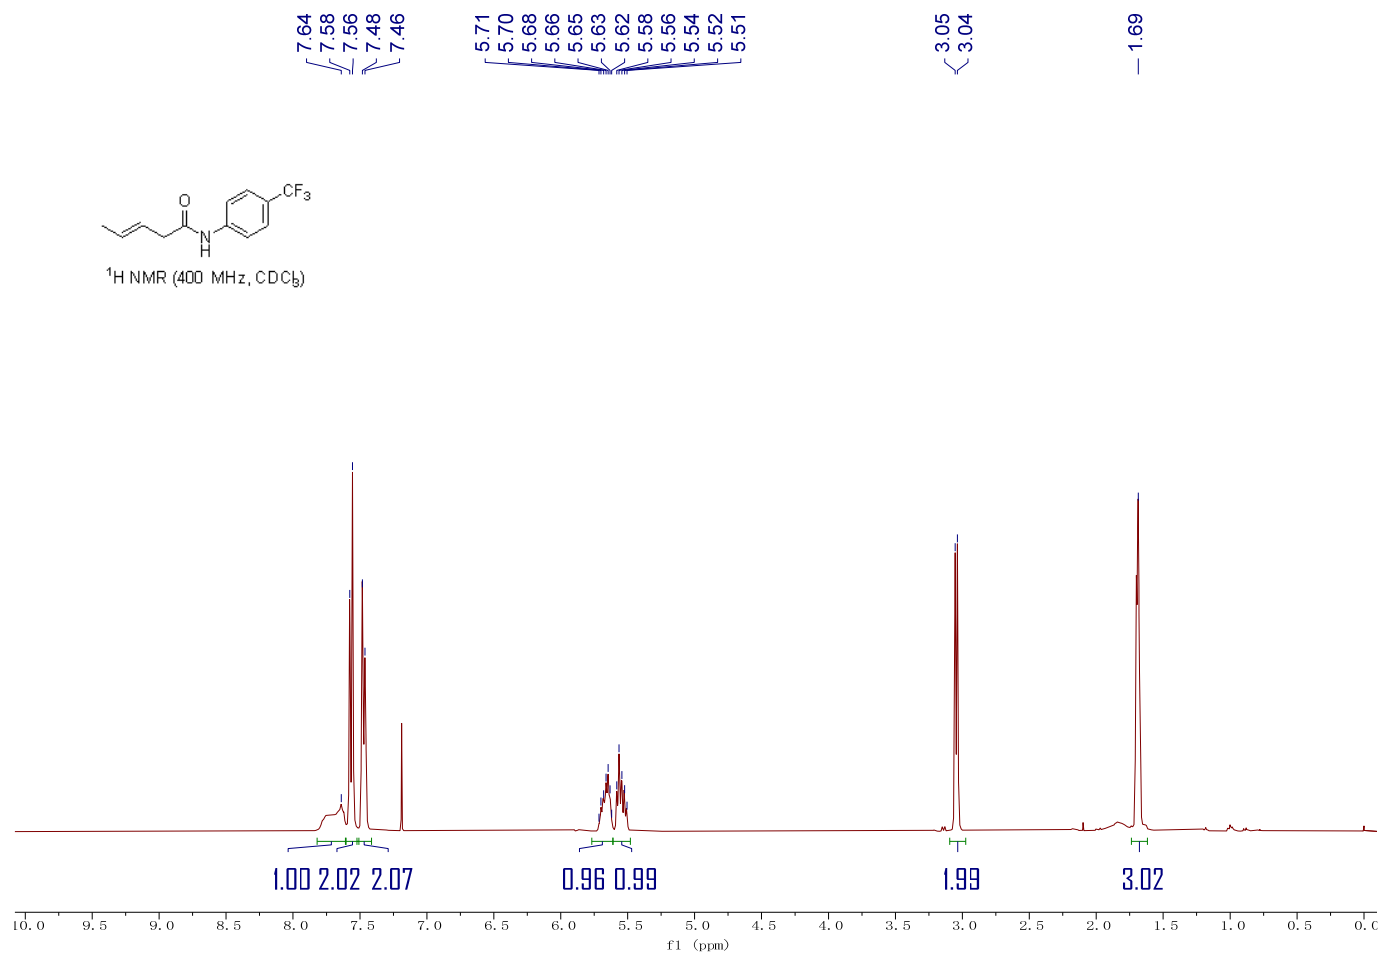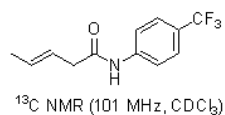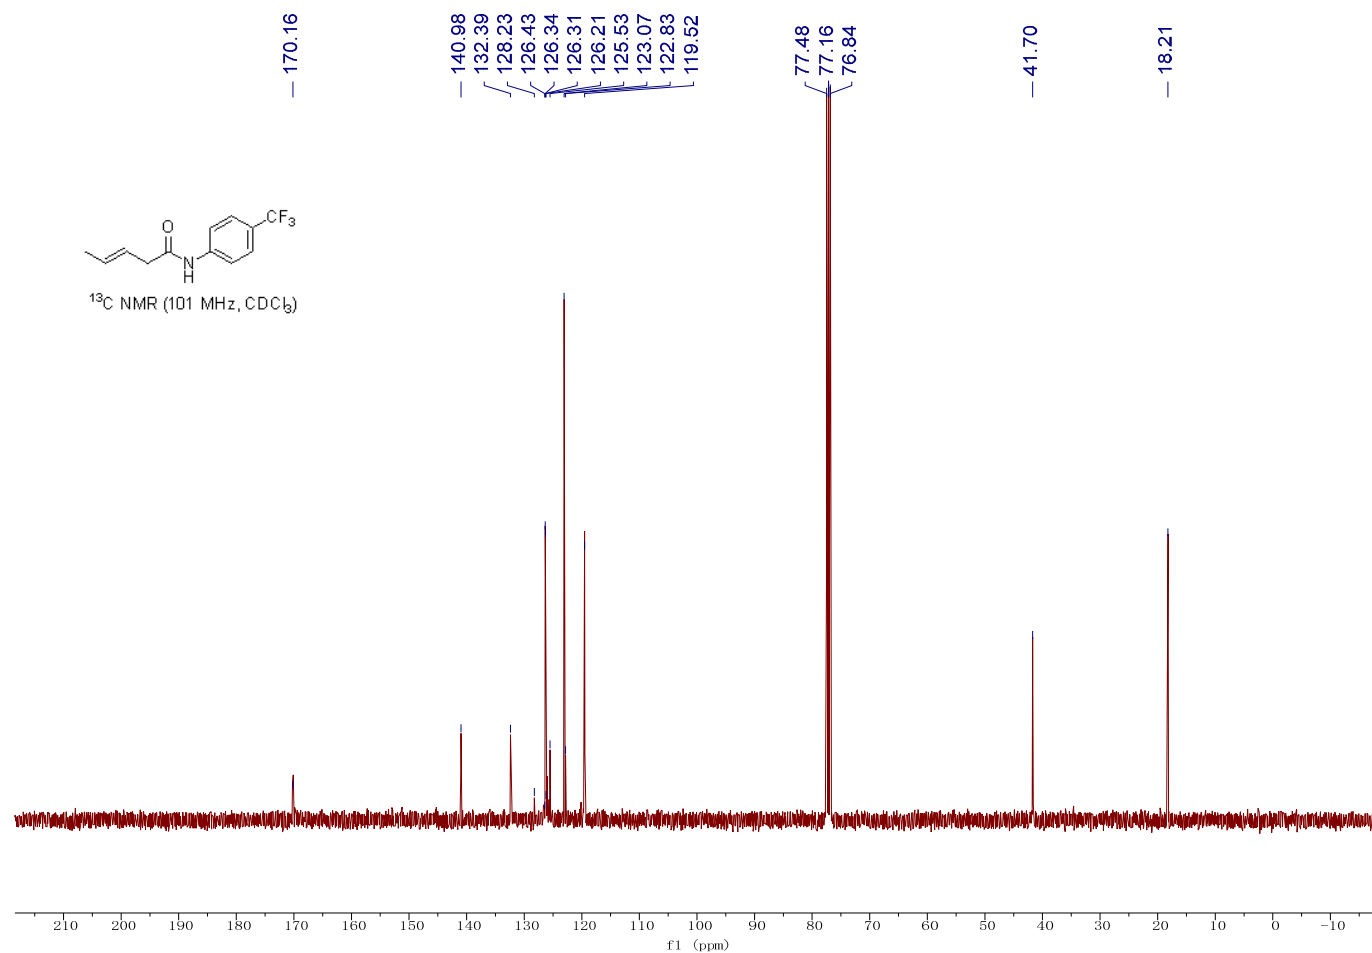

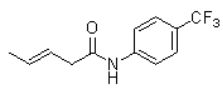

$^{19}\text{F}$  NMR (376 MHz,  $\text{CDCl}_3$ )

— 62.14

20 10 0 -10 -20 -30 -40 -50 -60 -70 -80 -90 -100 -110 -120 -130 -140 -150 -160 -170 -180 -190 -200 -210 -220

f1 (ppm)

7.35  
7.34  
7.33  
7.32  
7.31  
7.30  
6.78  
6.76

5.69  
5.68  
5.67  
5.66  
5.64  
5.63  
5.61  
5.59  
5.58  
5.57  
5.56  
5.55  
5.55  
5.54  
5.54  
5.52  
5.52  
3.71  
3.01  
2.99

1.70  
1.68

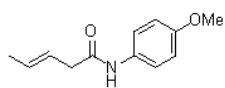

$^1\text{H}$  NMR (400 MHz,  $\text{CDCl}_3$ )

0.0 9.5 9.0 8.5 8.0 7.5 7.0 6.5 6.0 5.5 5.0 4.5 4.0 3.5 3.0 2.5 2.0 1.5 1.0 0.5 0.0

f1 (ppm)

2.93

2.11

1.00 1.01

3.24

2.06

3.32

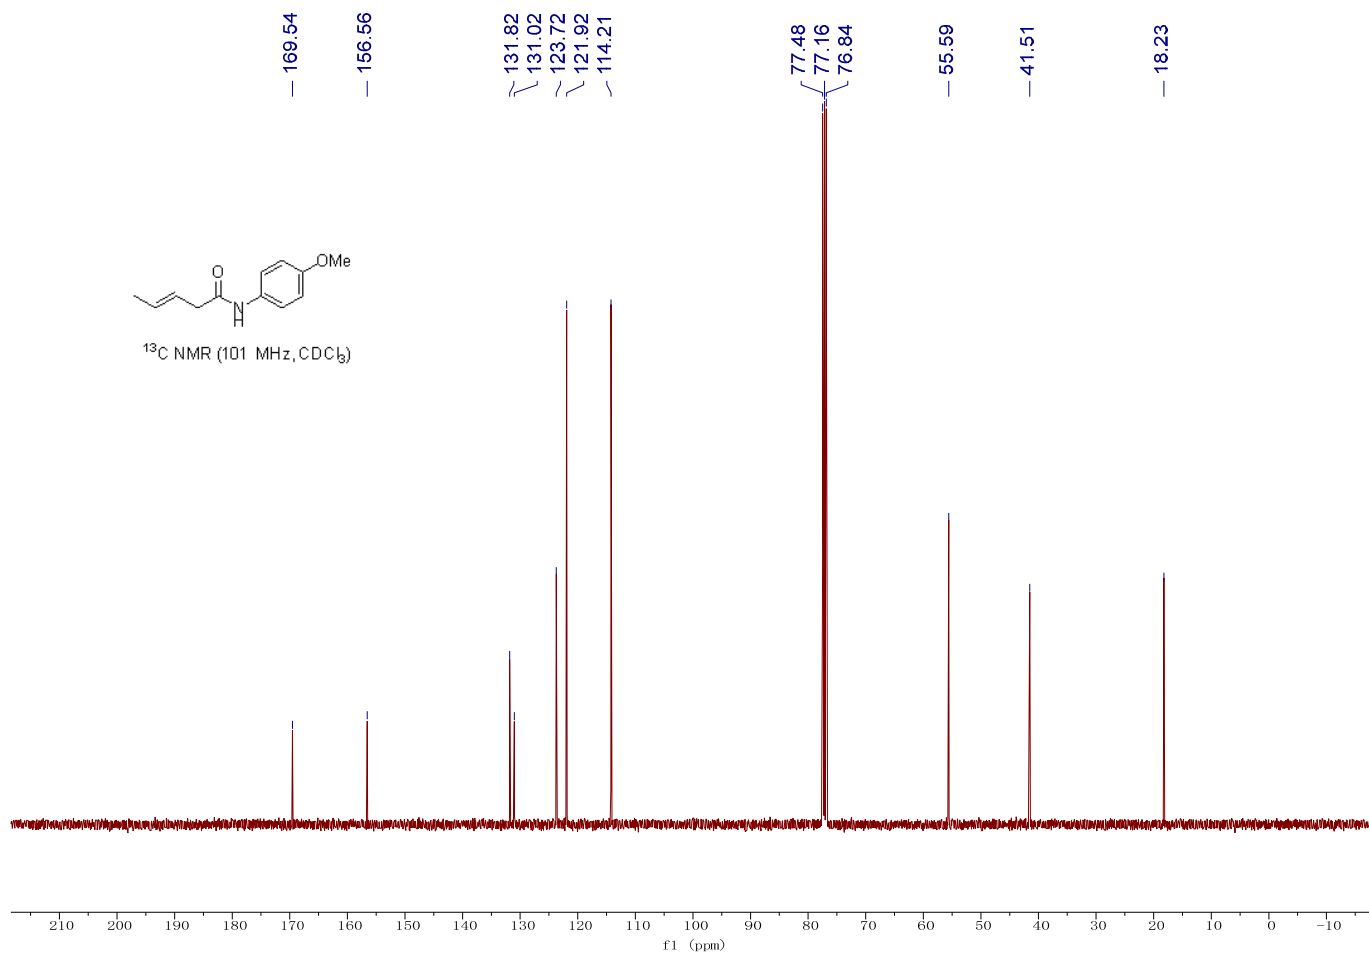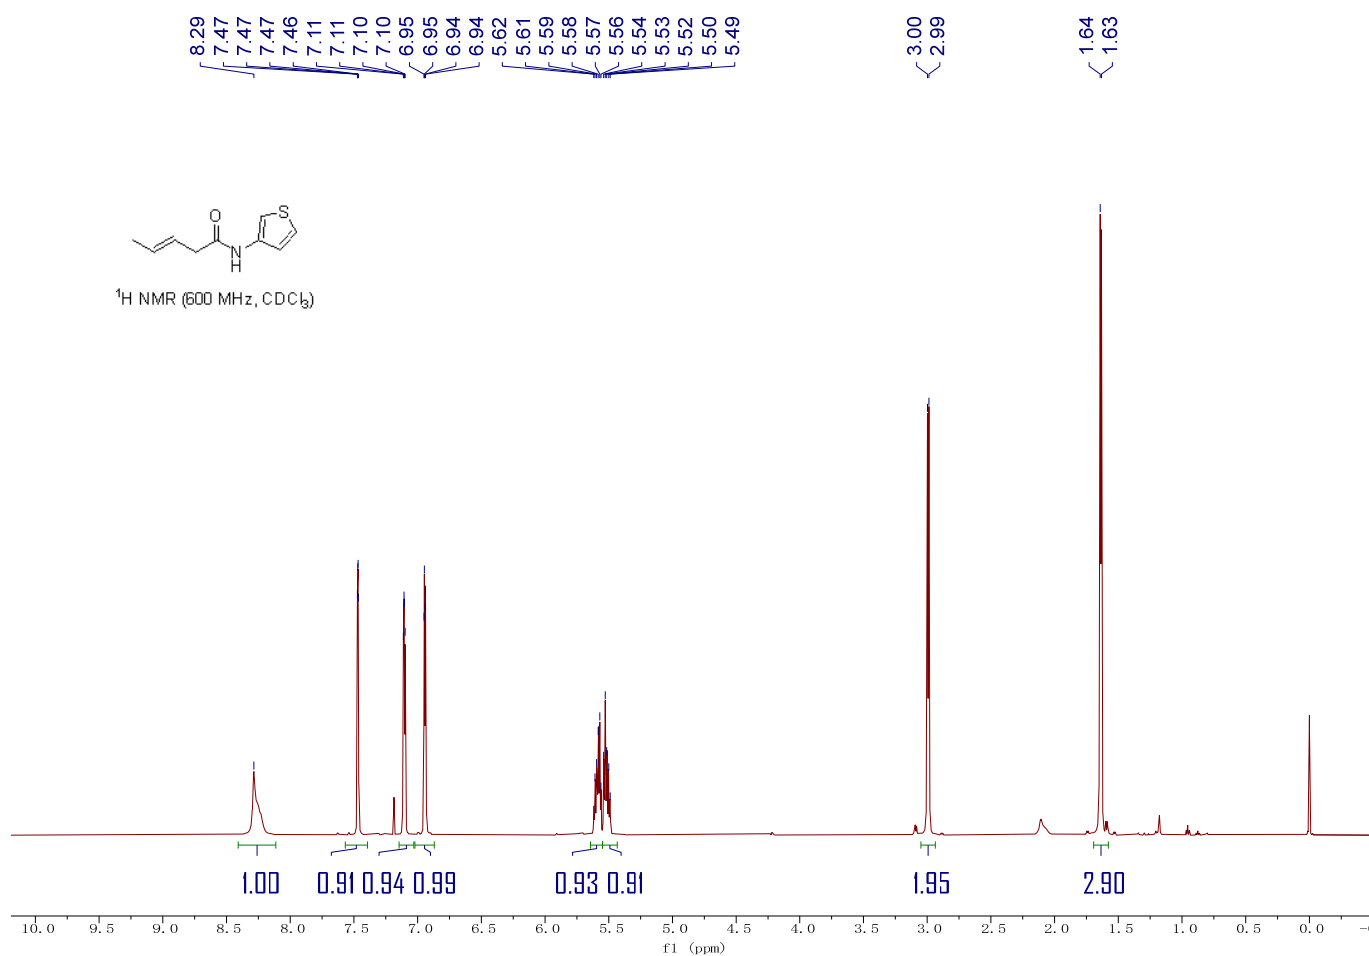

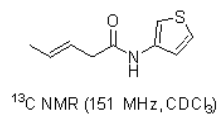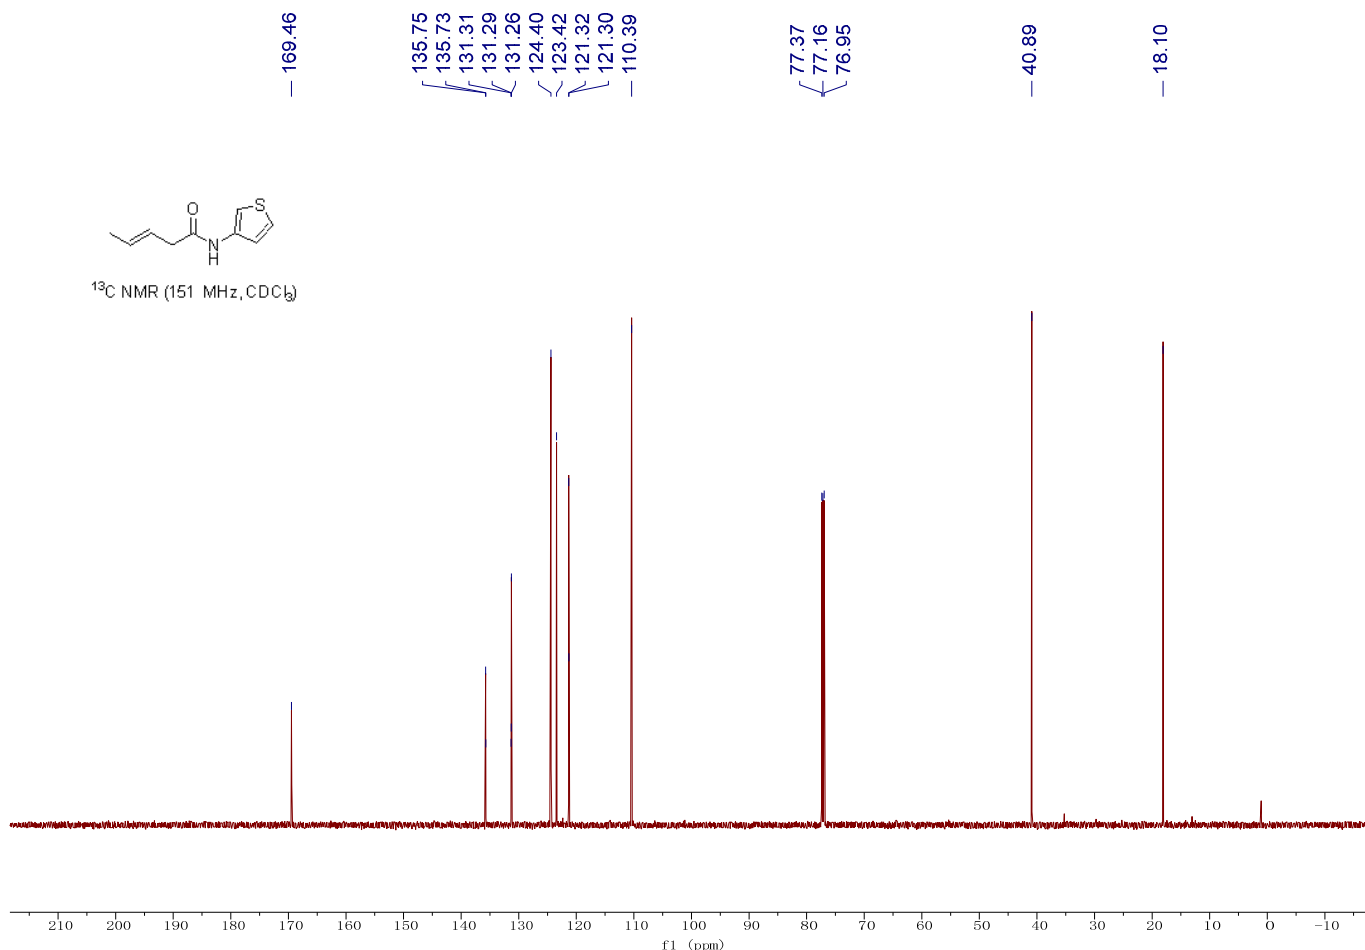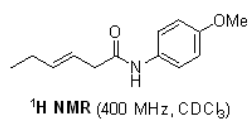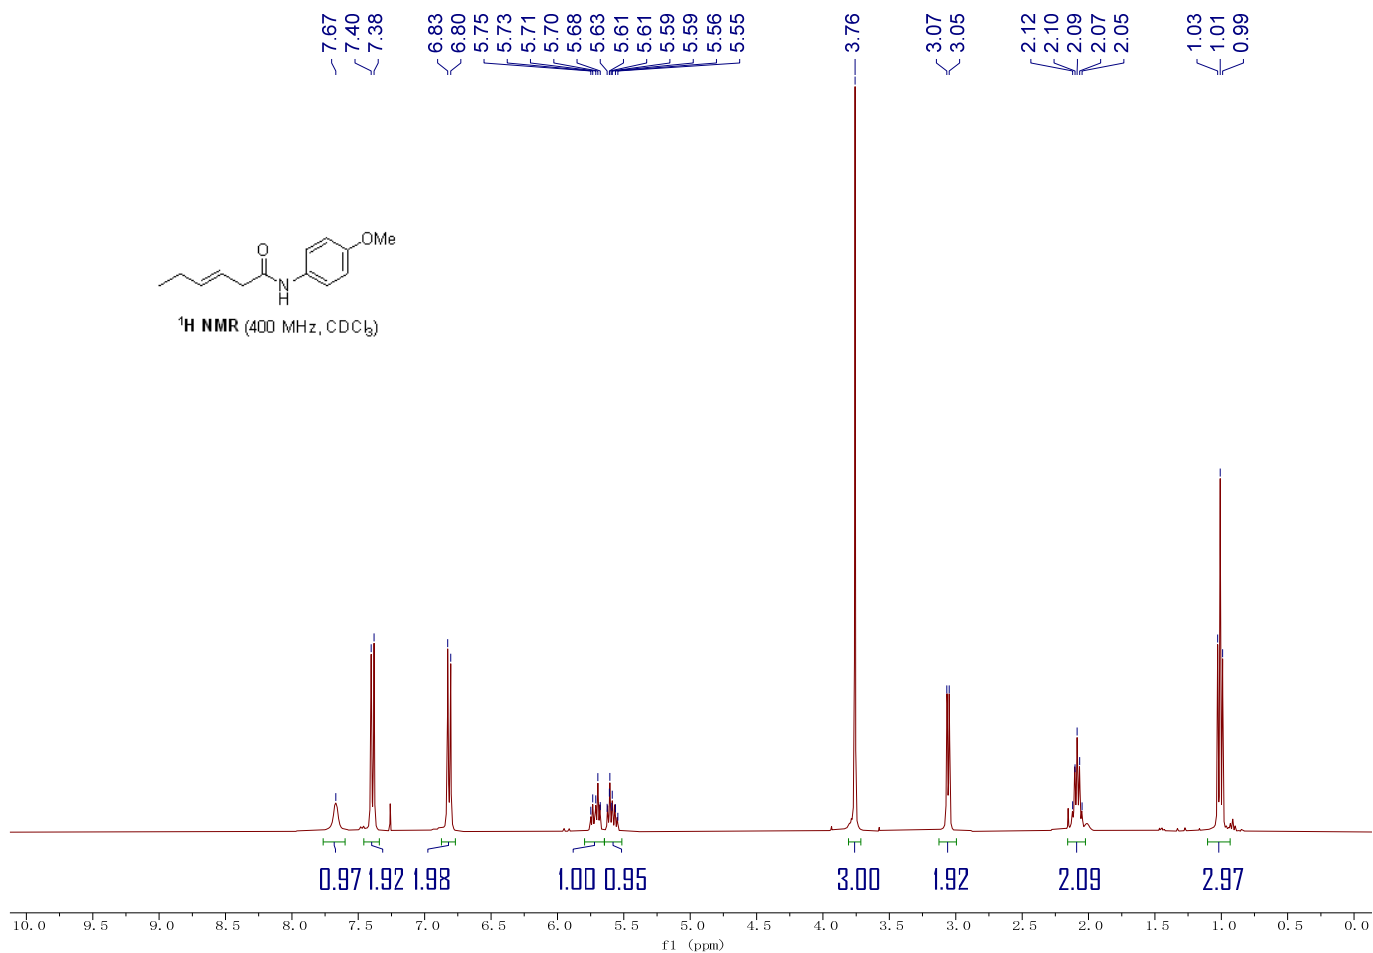



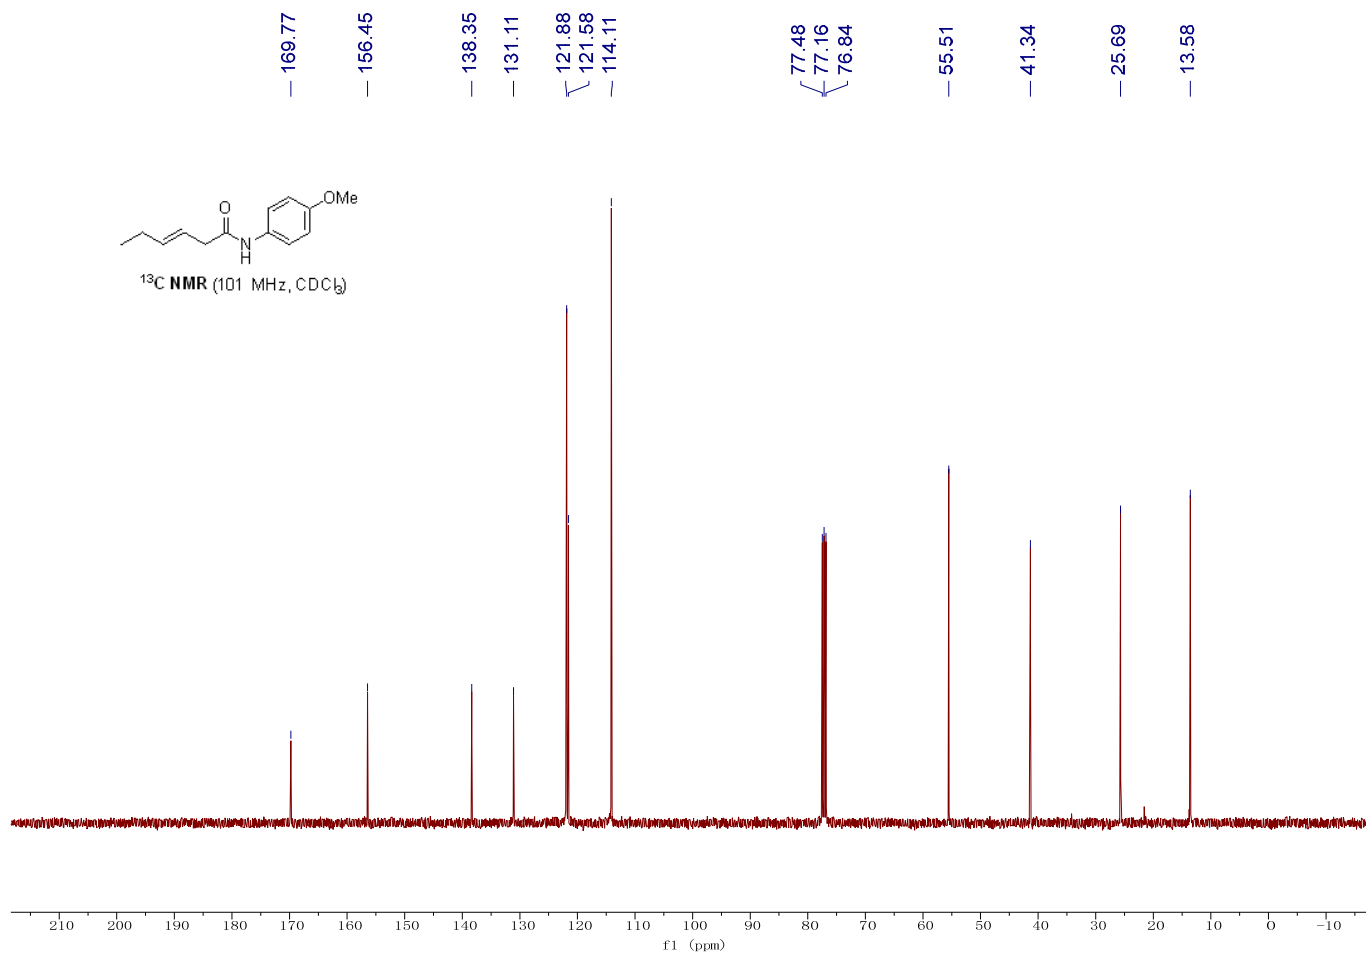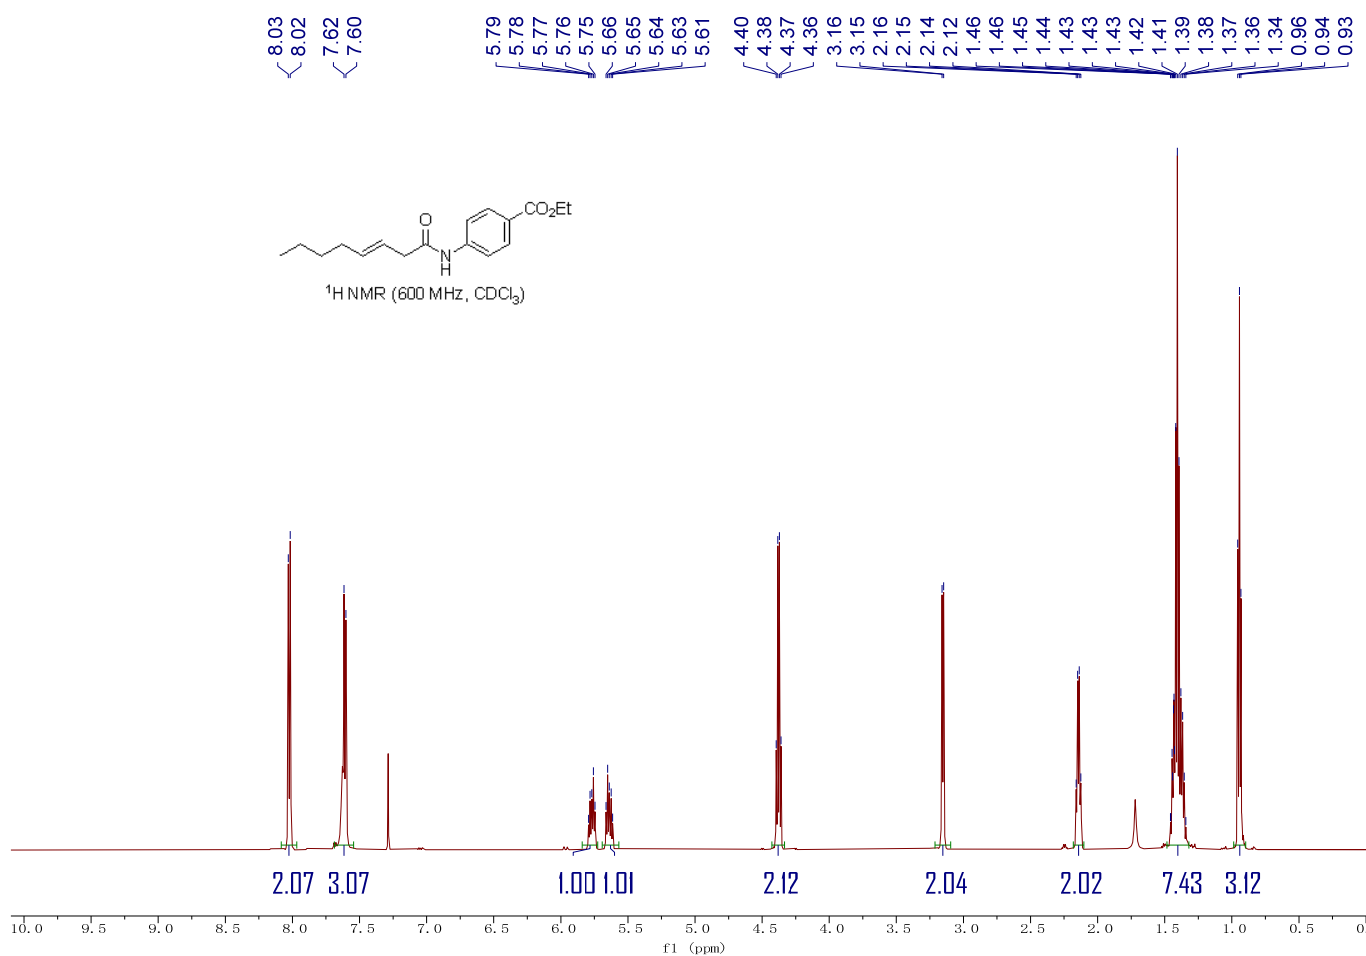

$\sim$  169.82  
 $\sim$  166.26  
 $\sim$  142.00  
 $\sim$  138.15  
 $\sim$  130.91  
 $\sim$  126.12  
 $\sim$  122.00  
 $\sim$  118.75  
 $\sim$  77.37  
 $\sim$  77.16  
 $\sim$  76.95  
 $\sim$  61.01  
 $\sim$  41.88  
 $\sim$  32.40  
 $\sim$  31.40  
 $\sim$  22.37  
 $\sim$  14.47  
 $\sim$  14.02

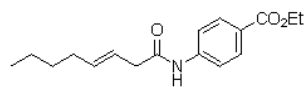

$^{13}\text{C}$  NMR (151 MHz,  $\text{CDCl}_3$ )

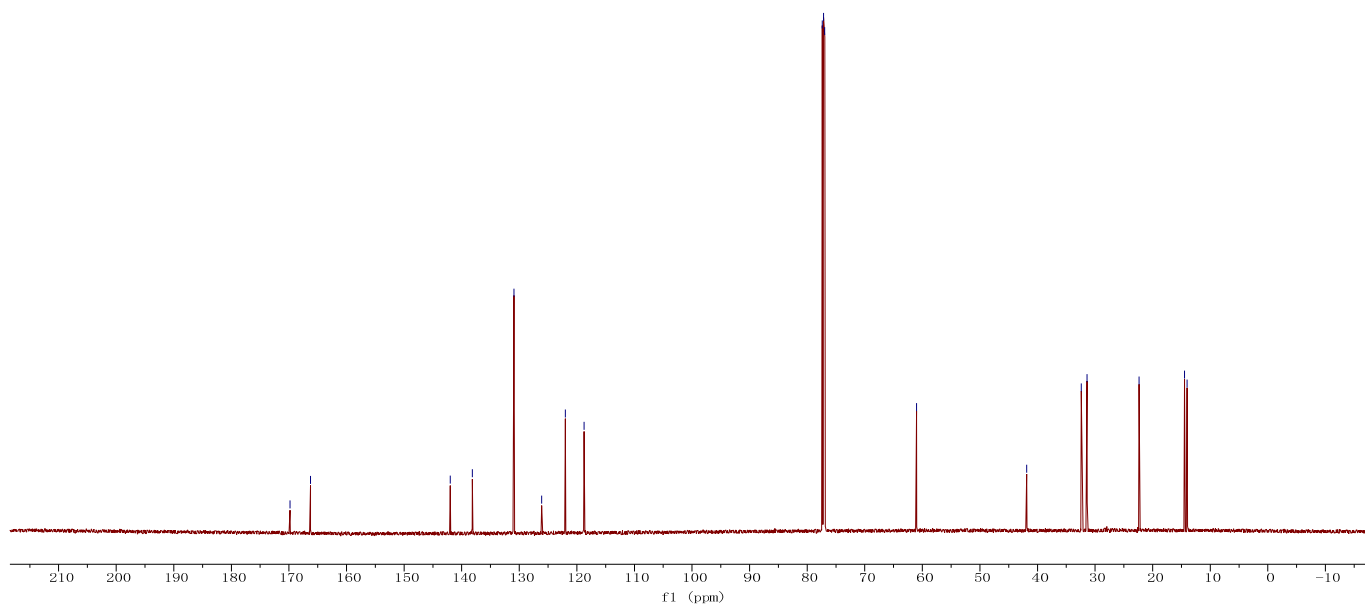

7.66  
 7.44  
 7.42  
 7.24  
 7.22  
 7.20  
 7.03  
 7.01  
 6.99  
 5.71  
 5.69  
 5.66  
 5.65  
 5.57  
 5.55  
 5.53  
 5.50  
 3.10  
 3.08  
 2.07  
 2.05  
 2.03  
 2.02  
 2.00  
 0.95  
 0.94  
 0.92

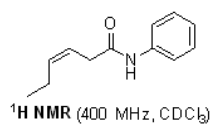

$^1\text{H}$  NMR (400 MHz,  $\text{CDCl}_3$ )

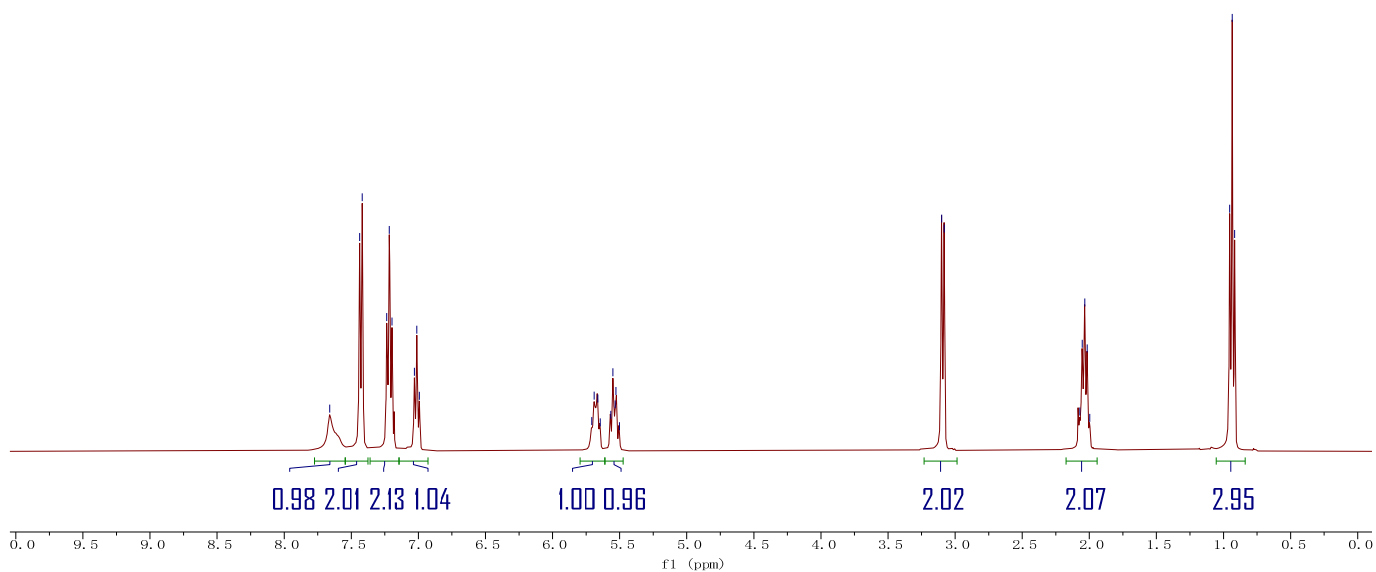

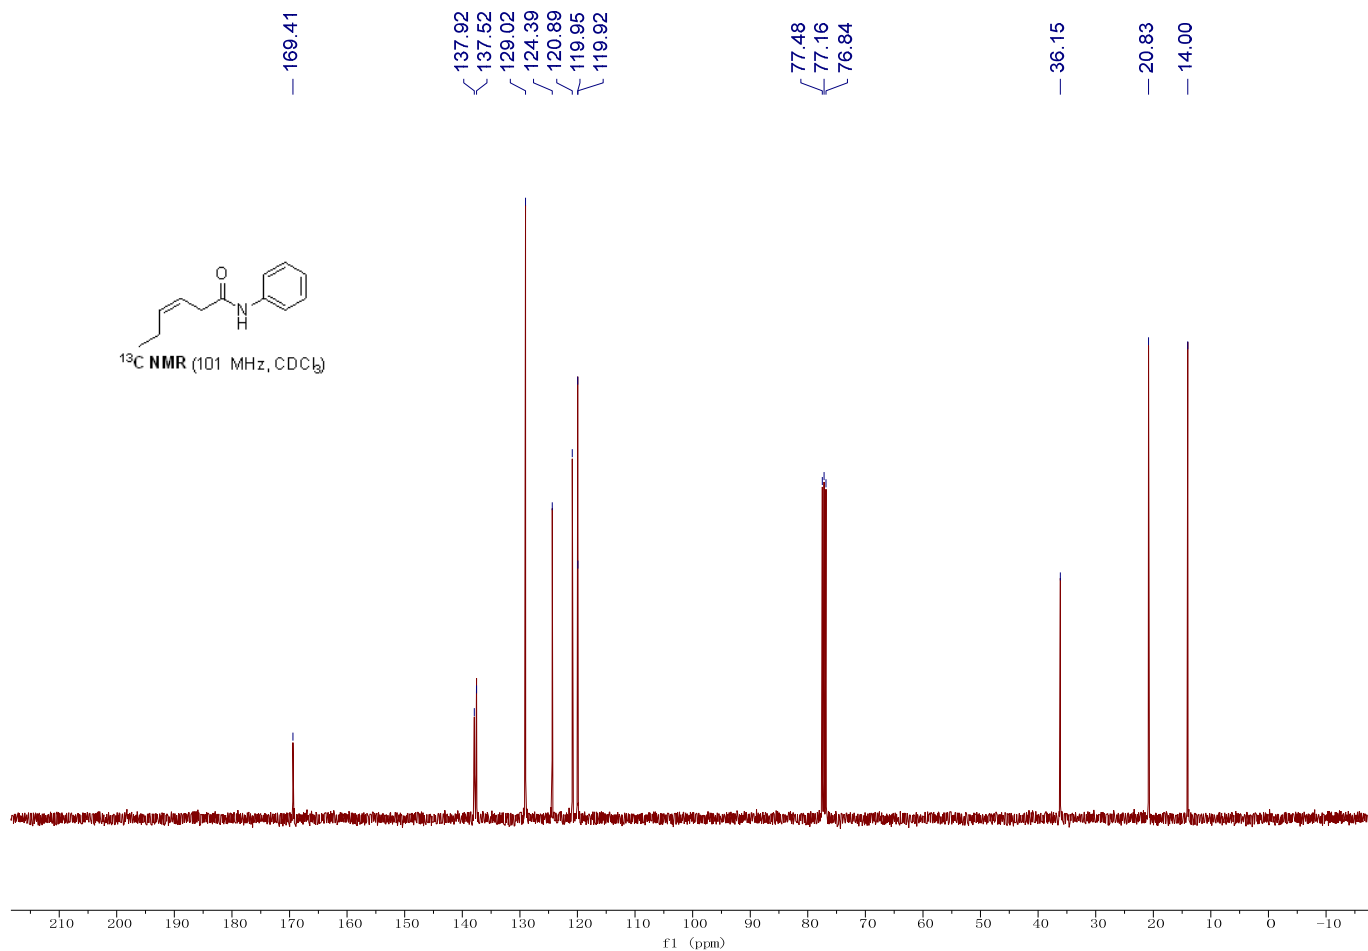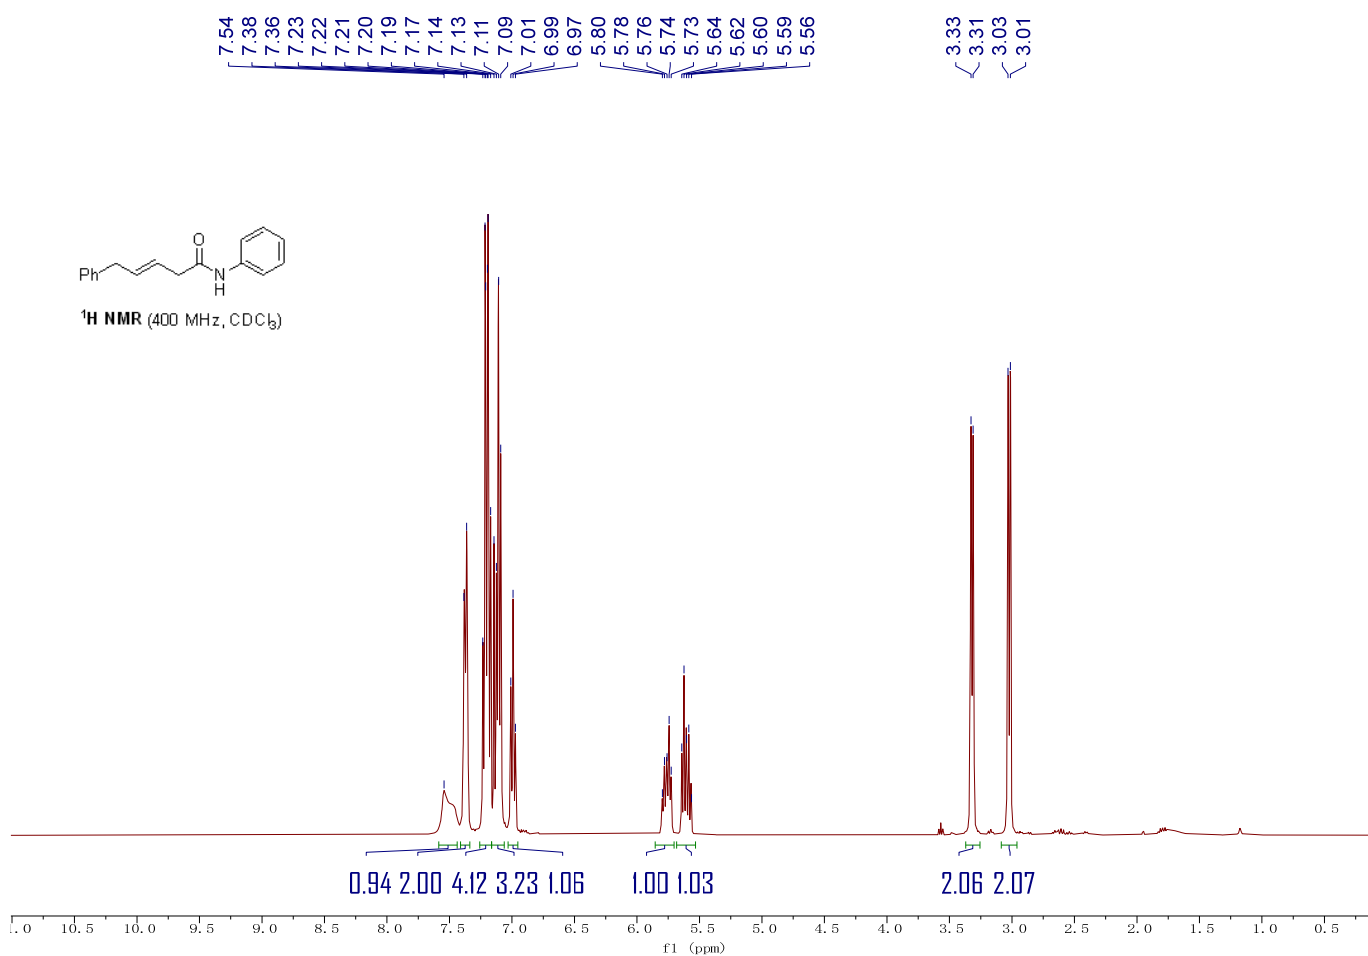

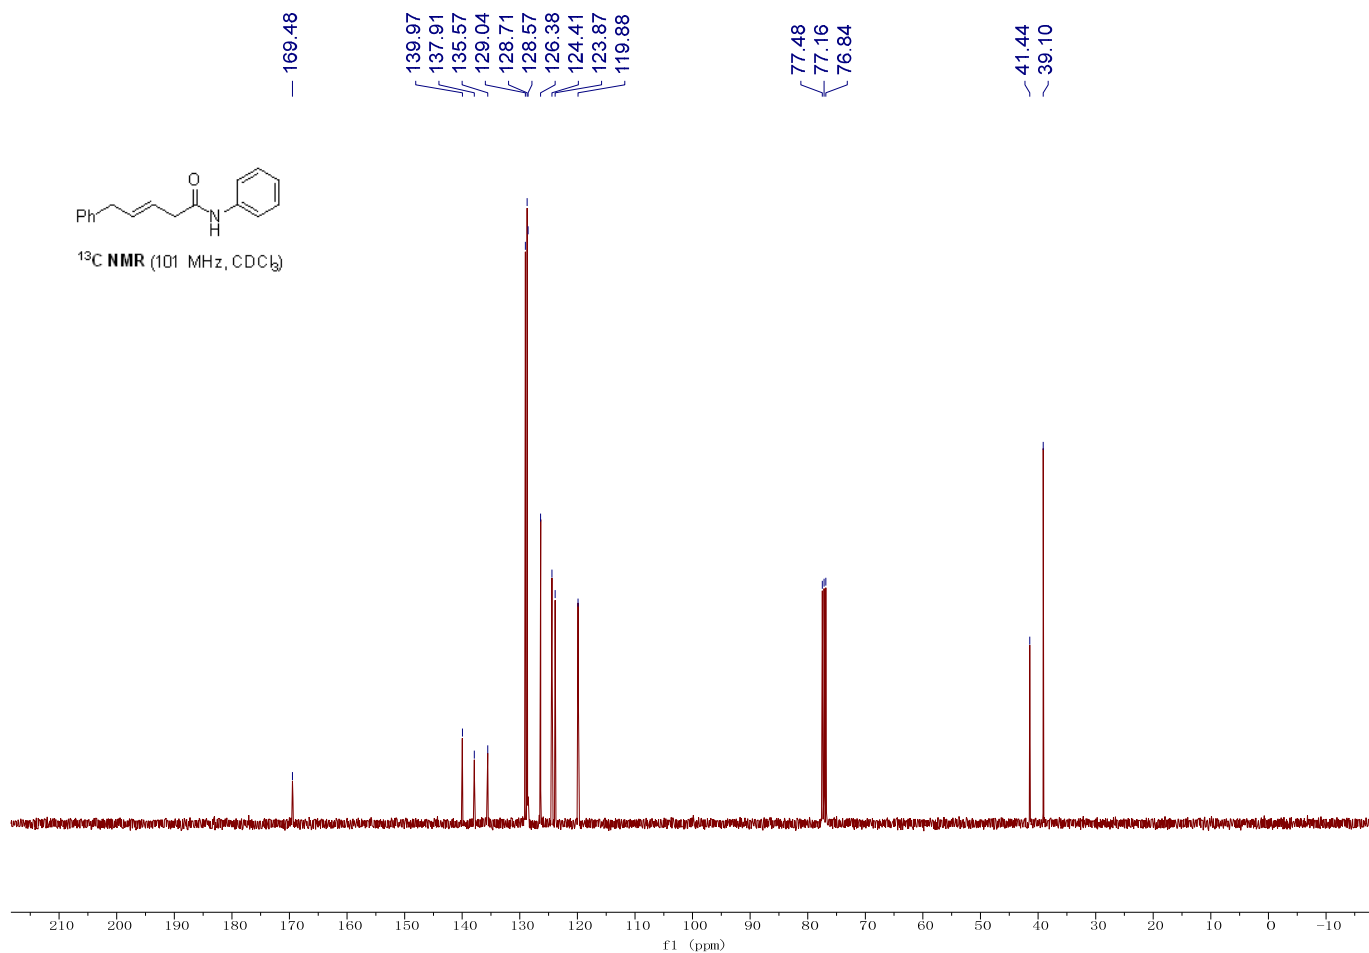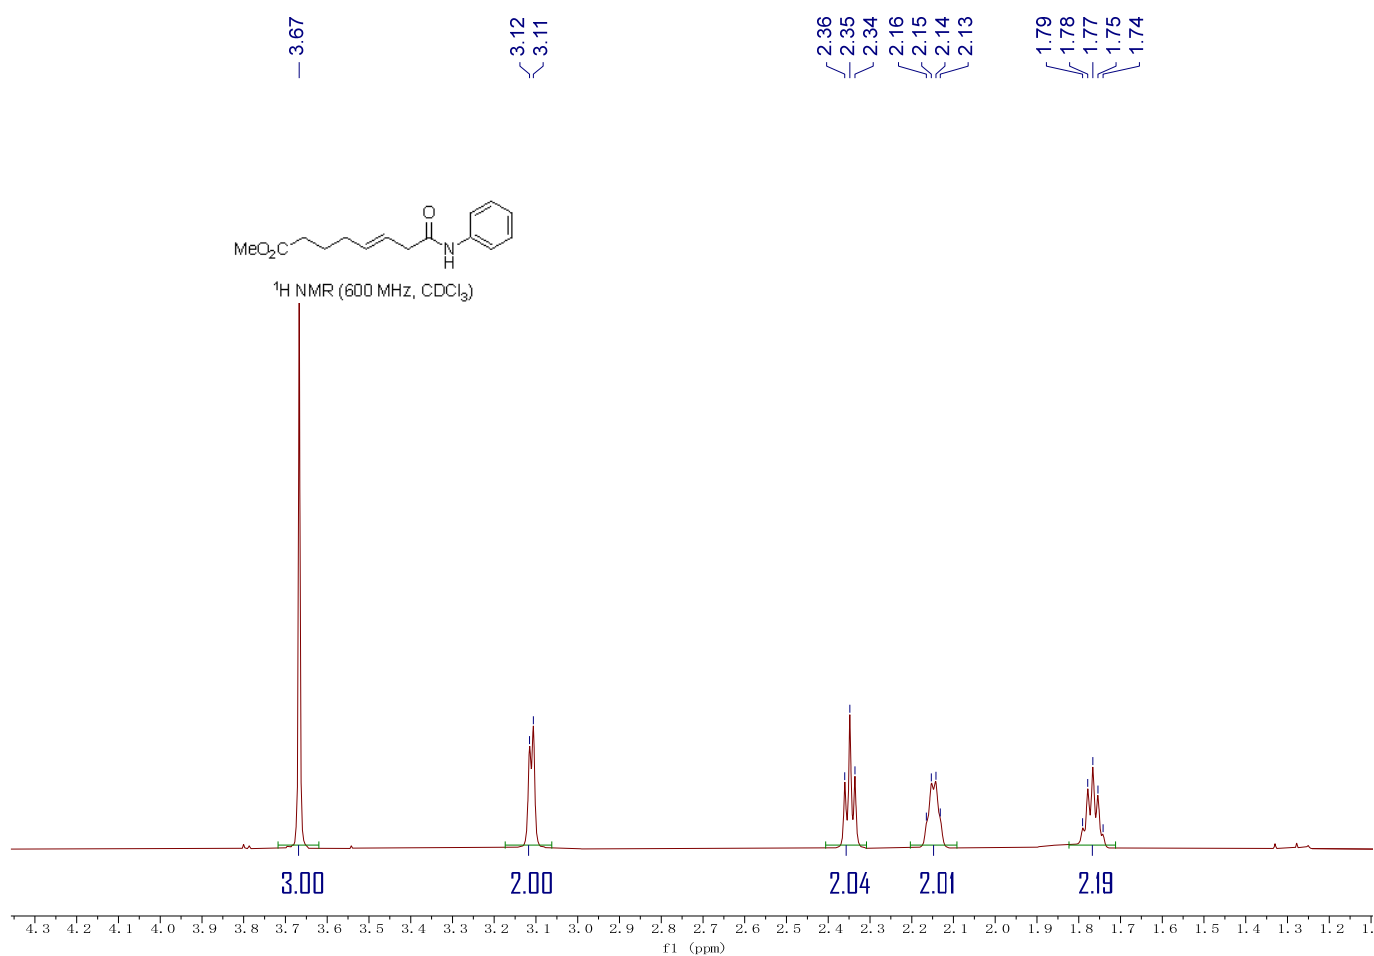

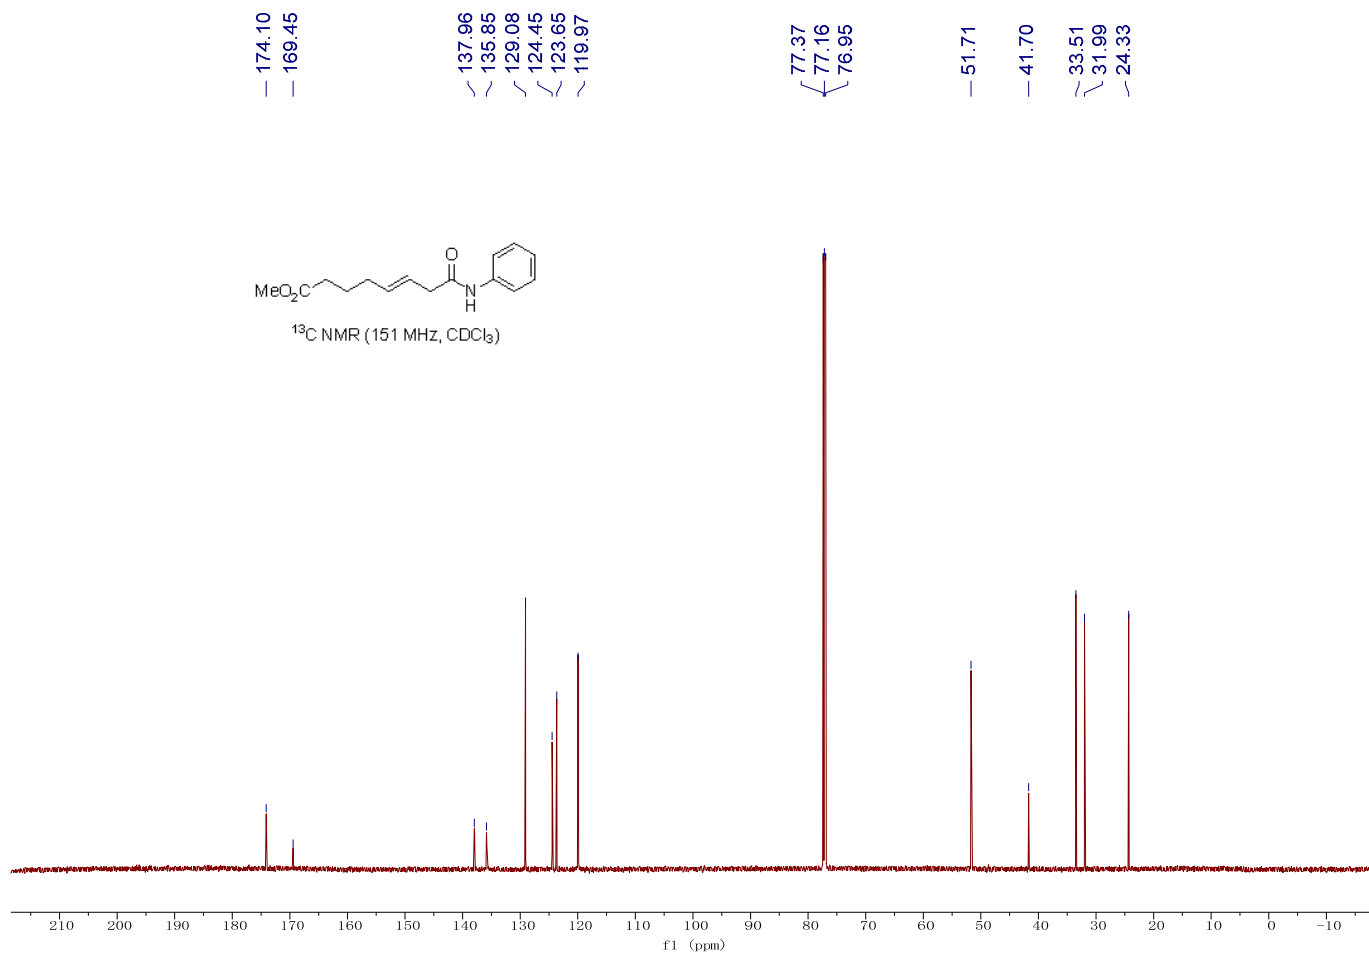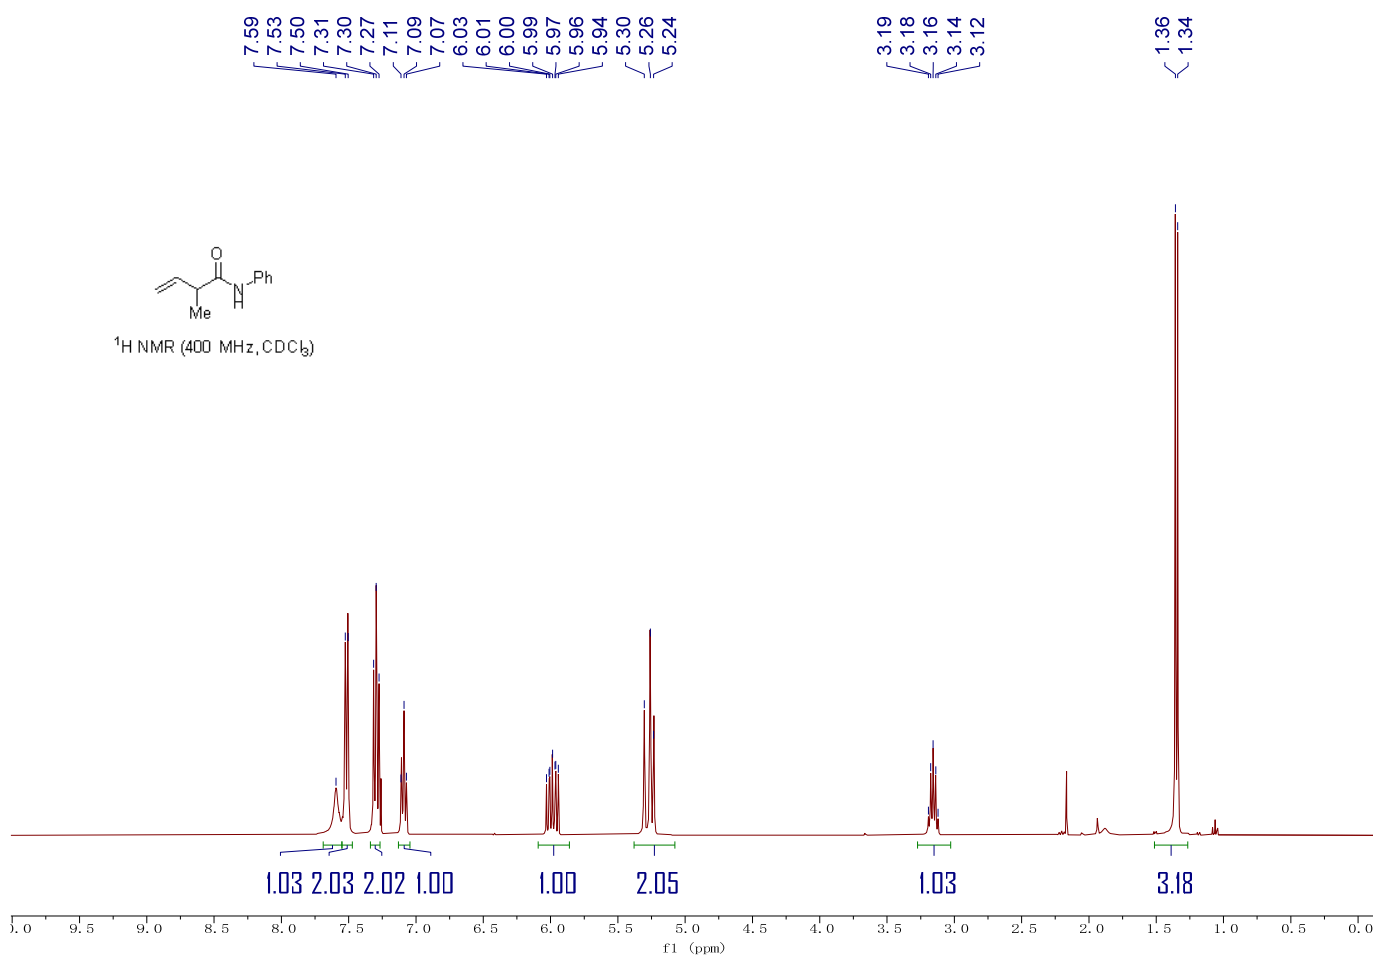

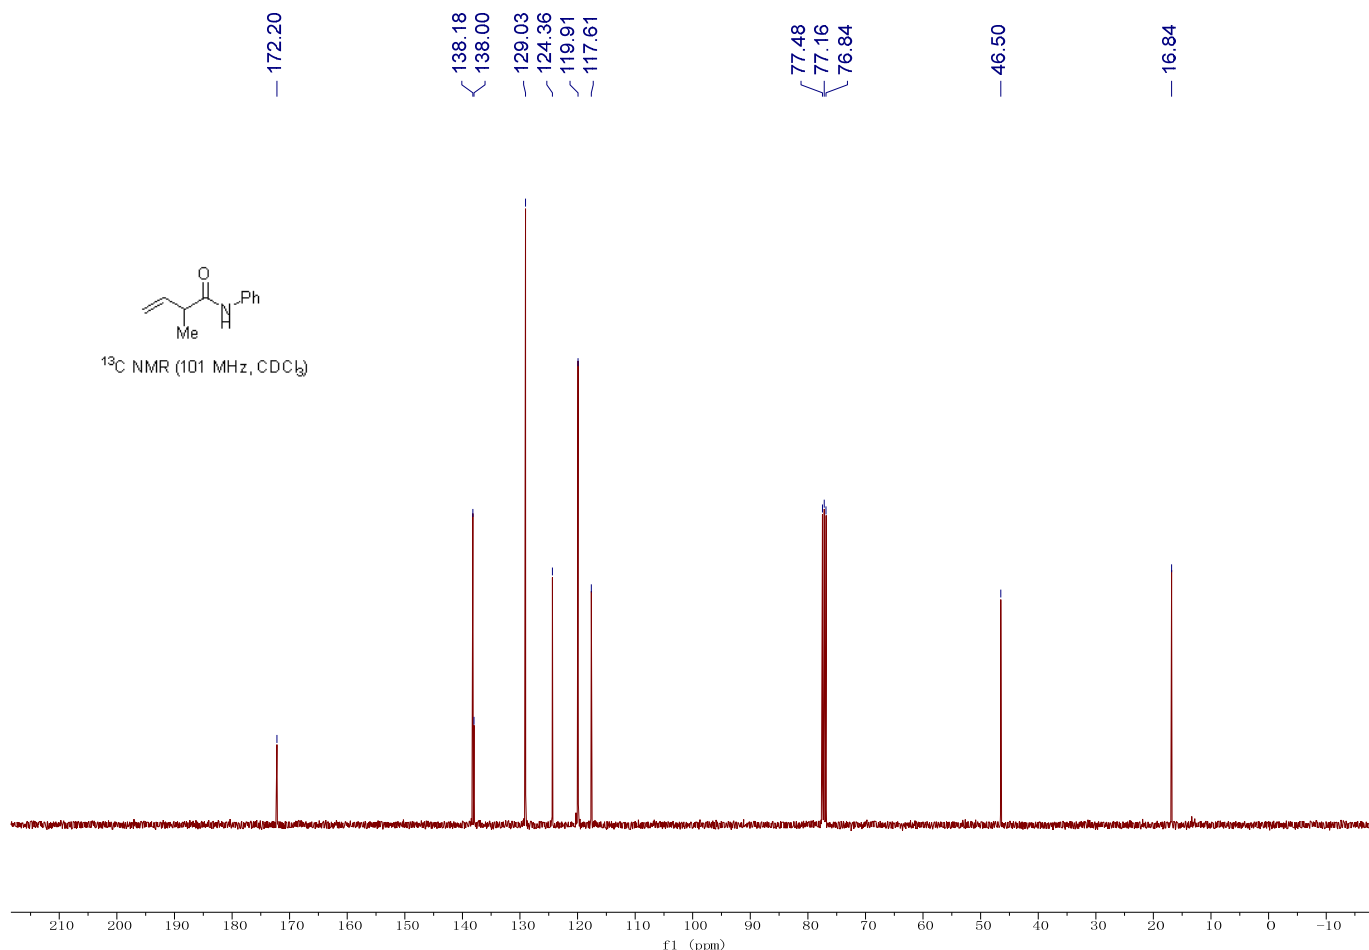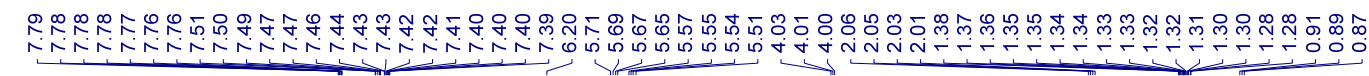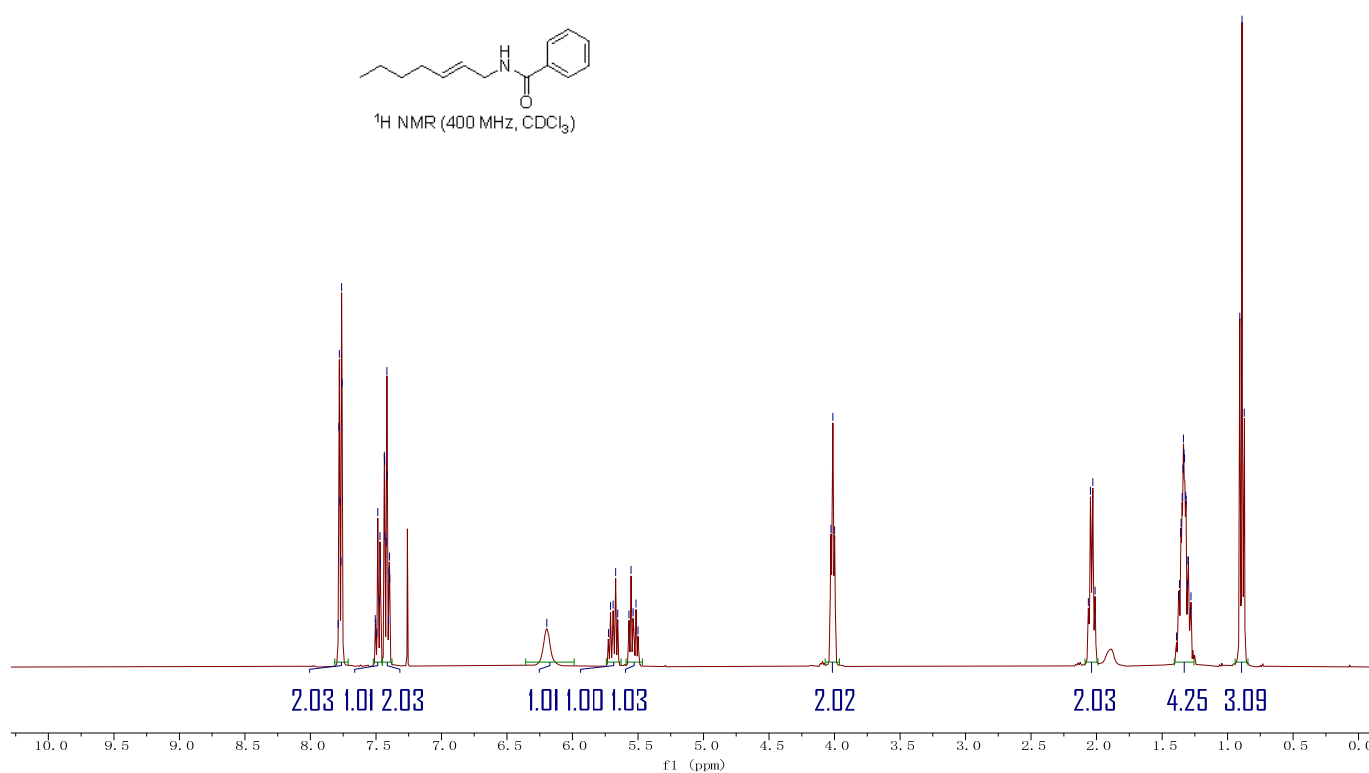

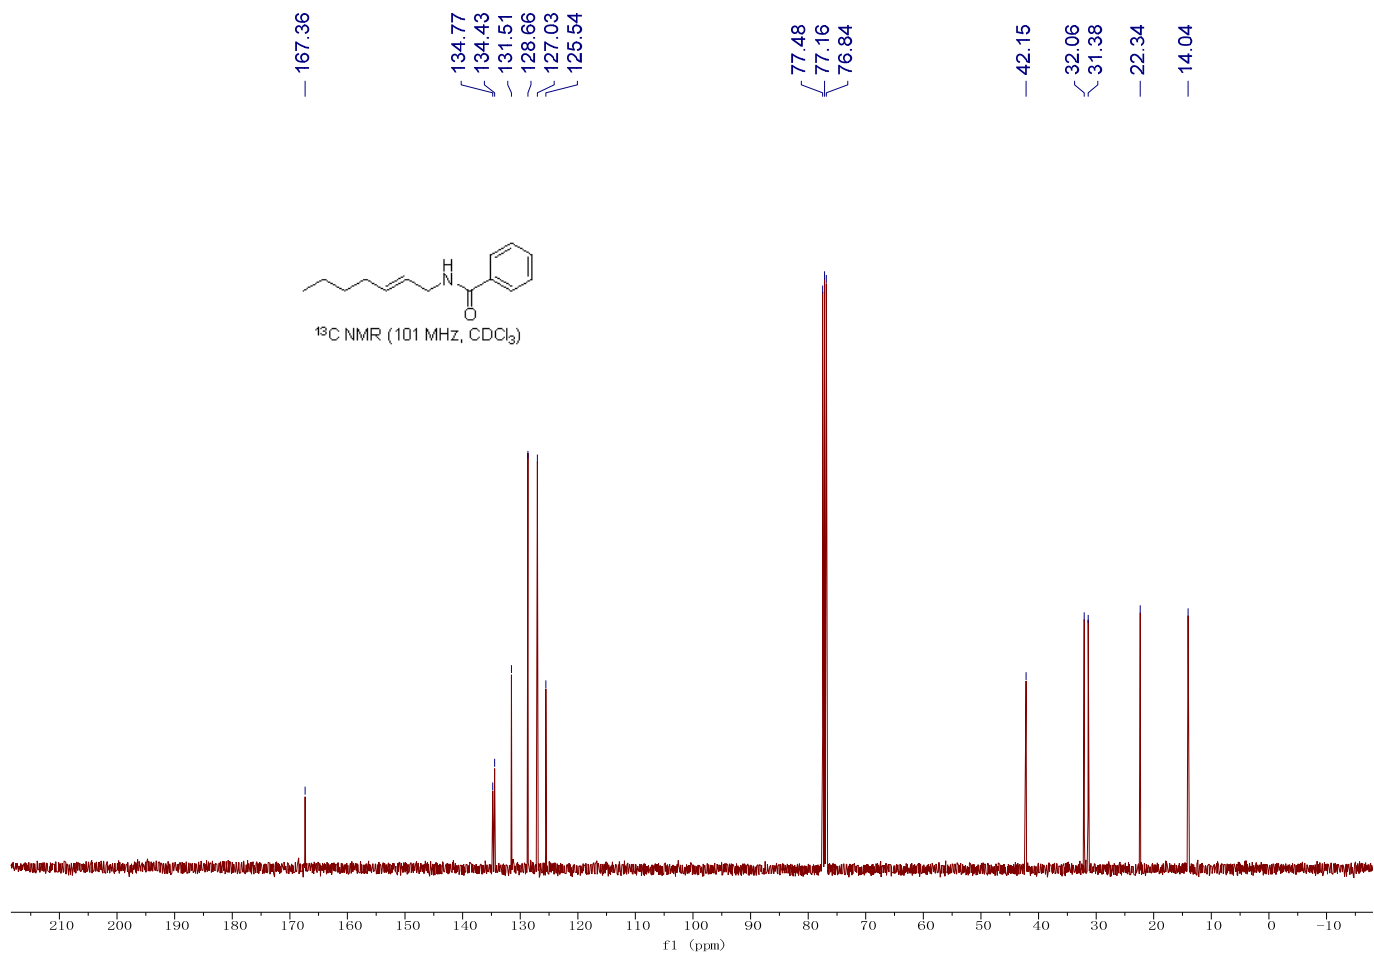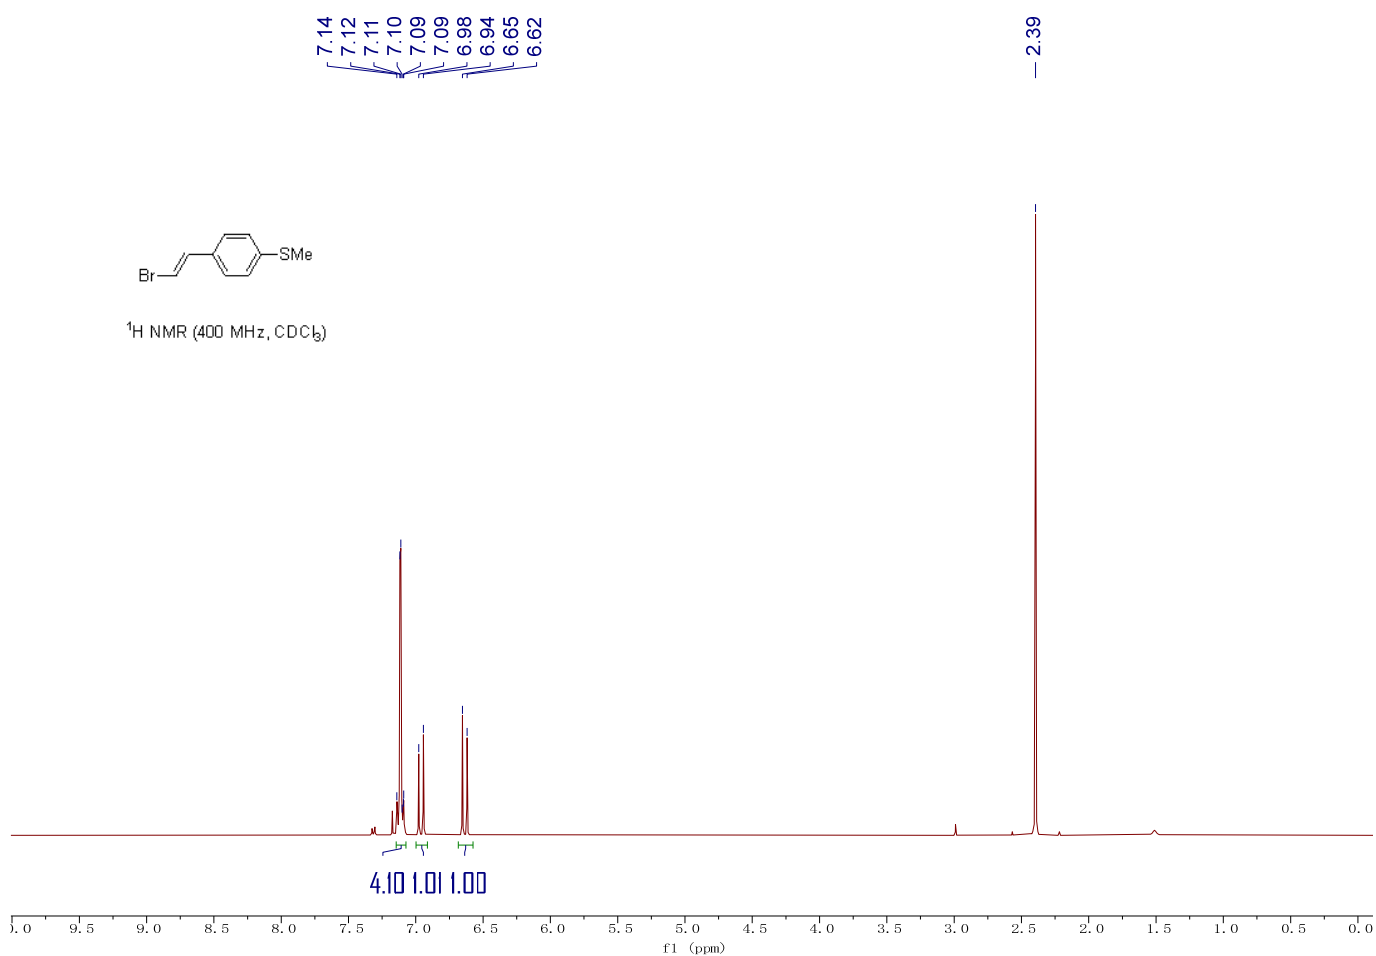

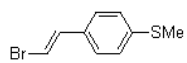

$^{13}\text{C}$  NMR (101 MHz,  $\text{CDCl}_3$ )

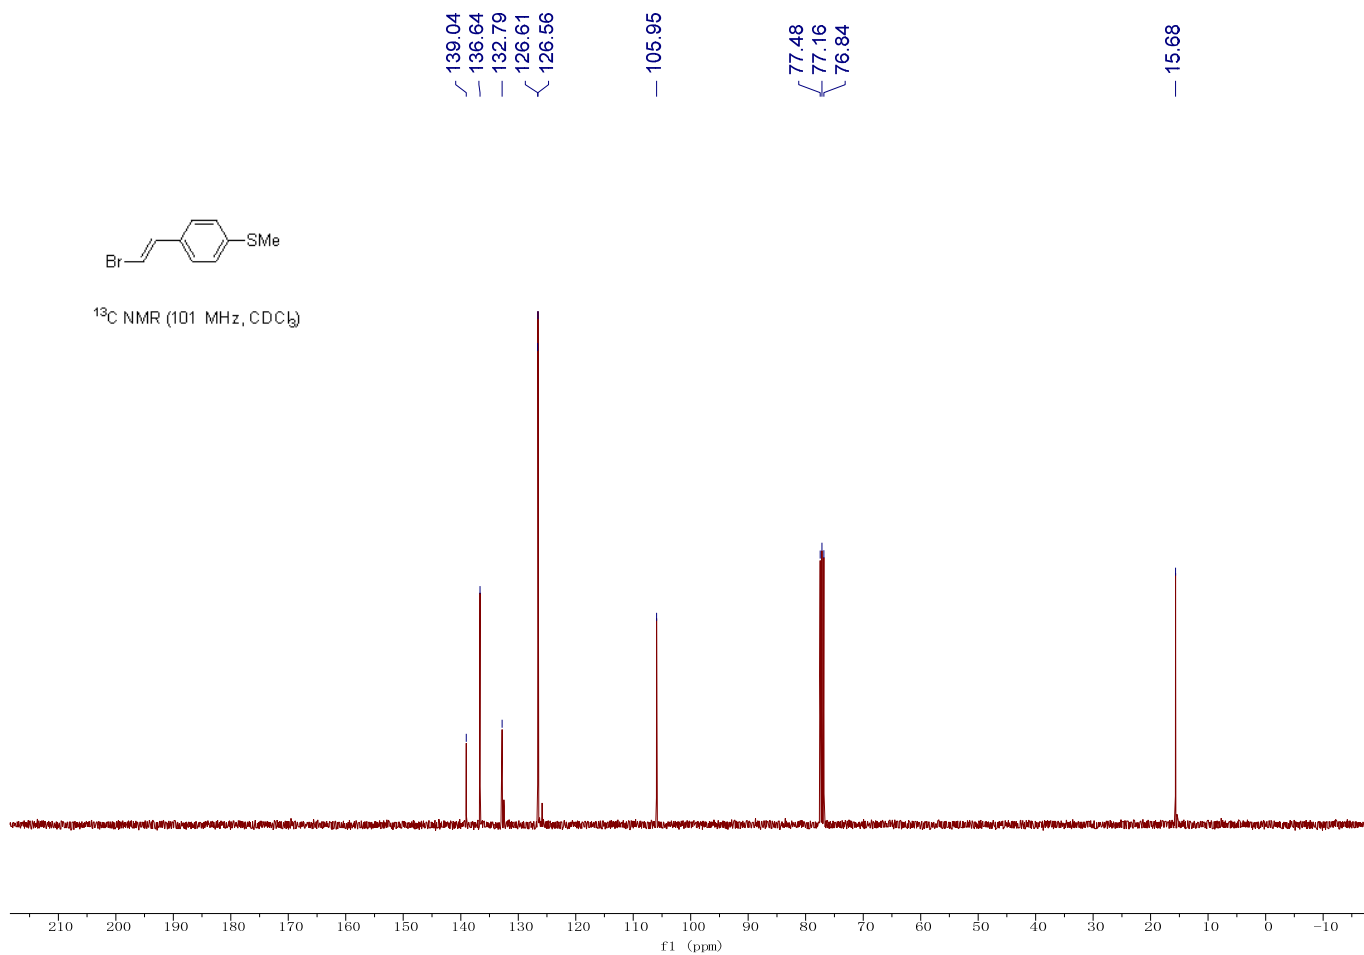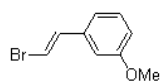

$^1\text{H}$  NMR (400 MHz,  $\text{CDCl}_3$ )

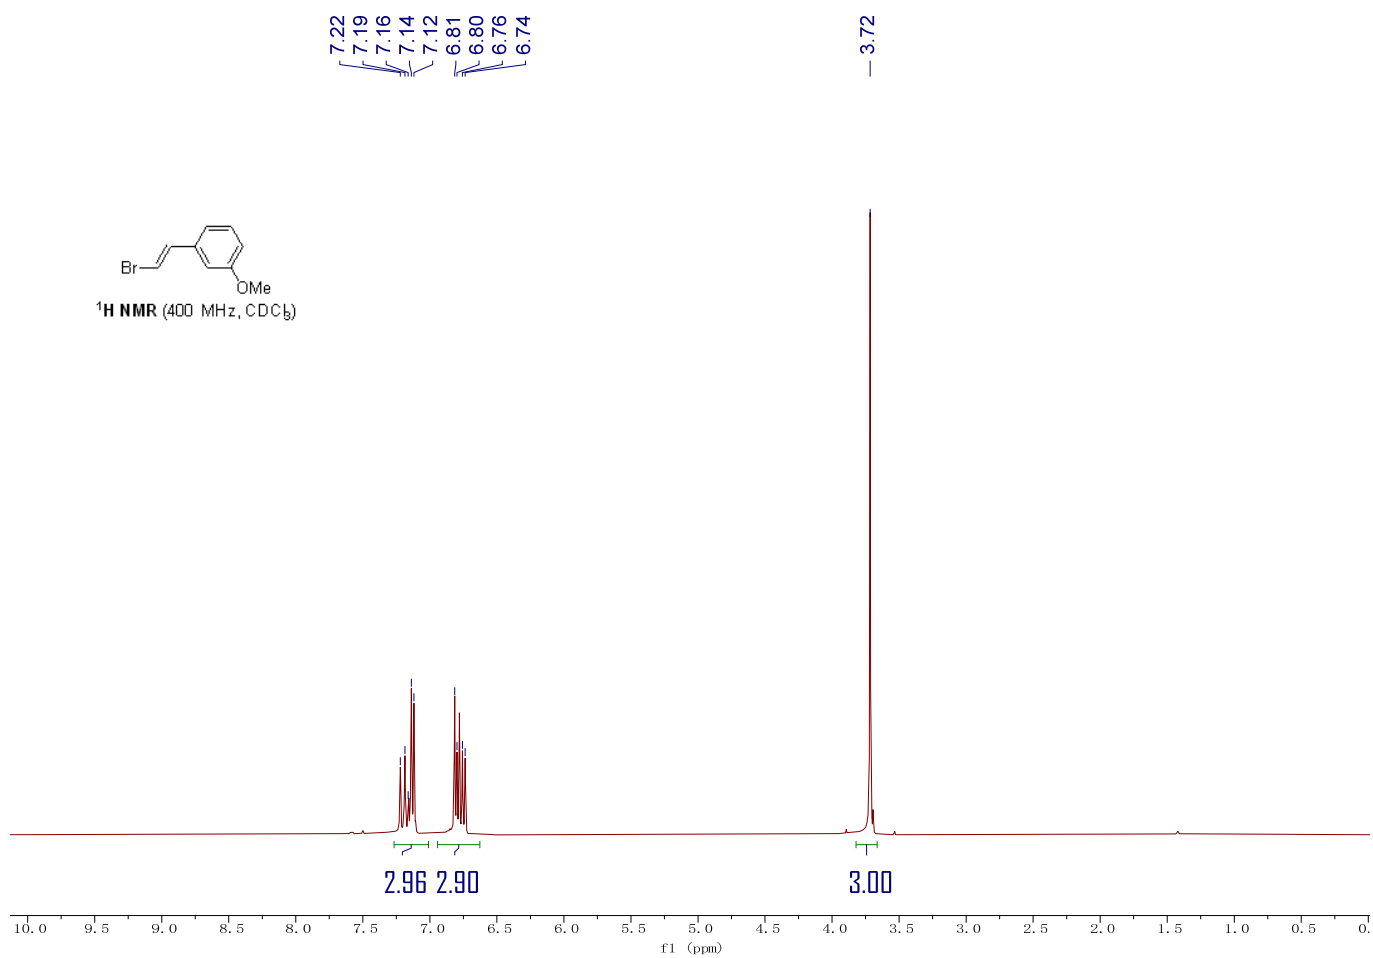



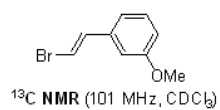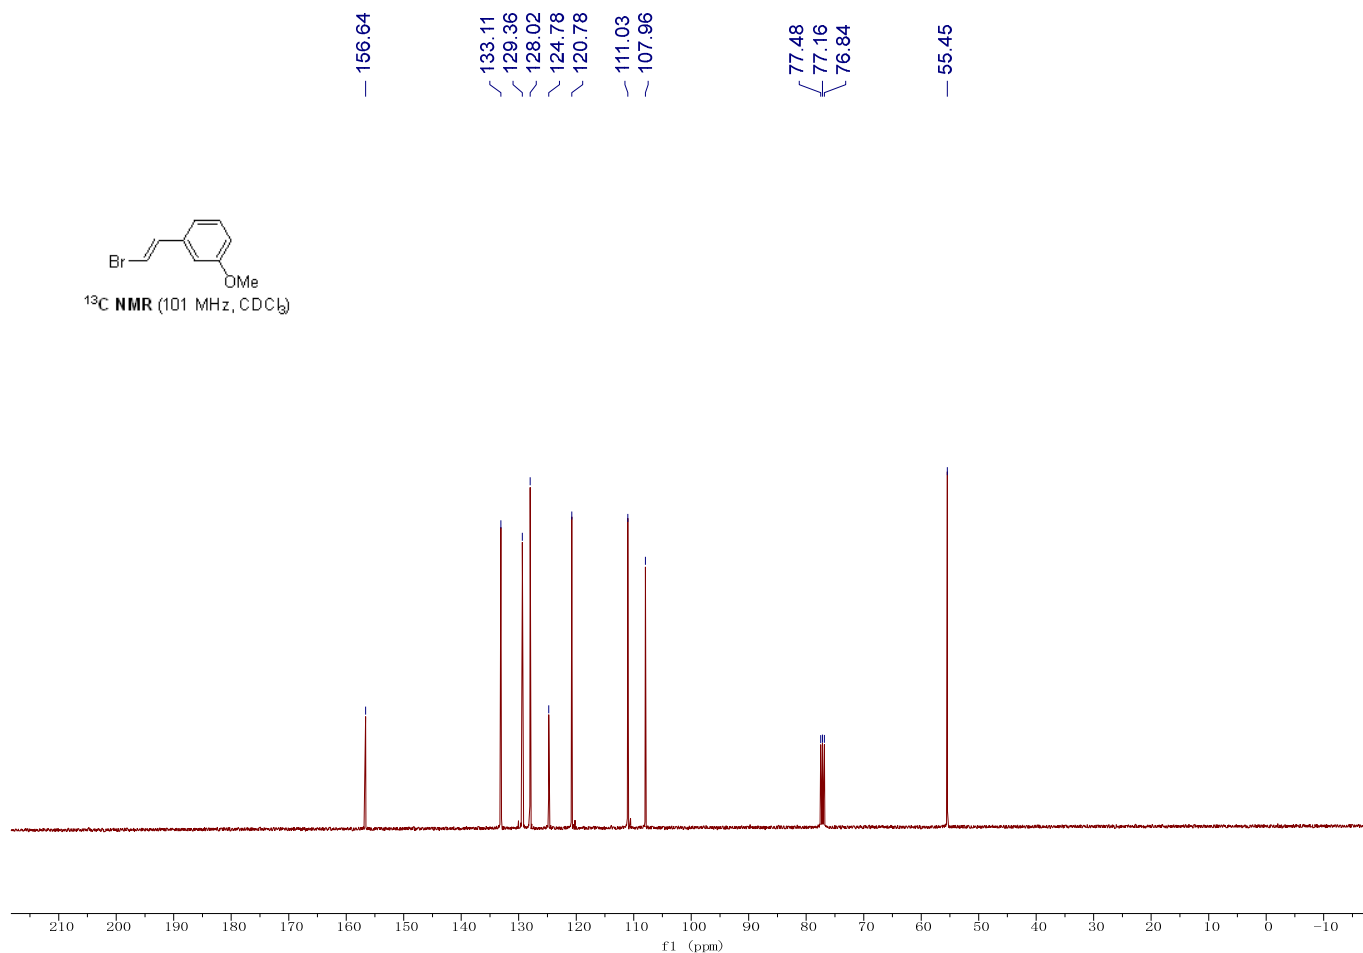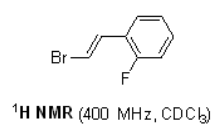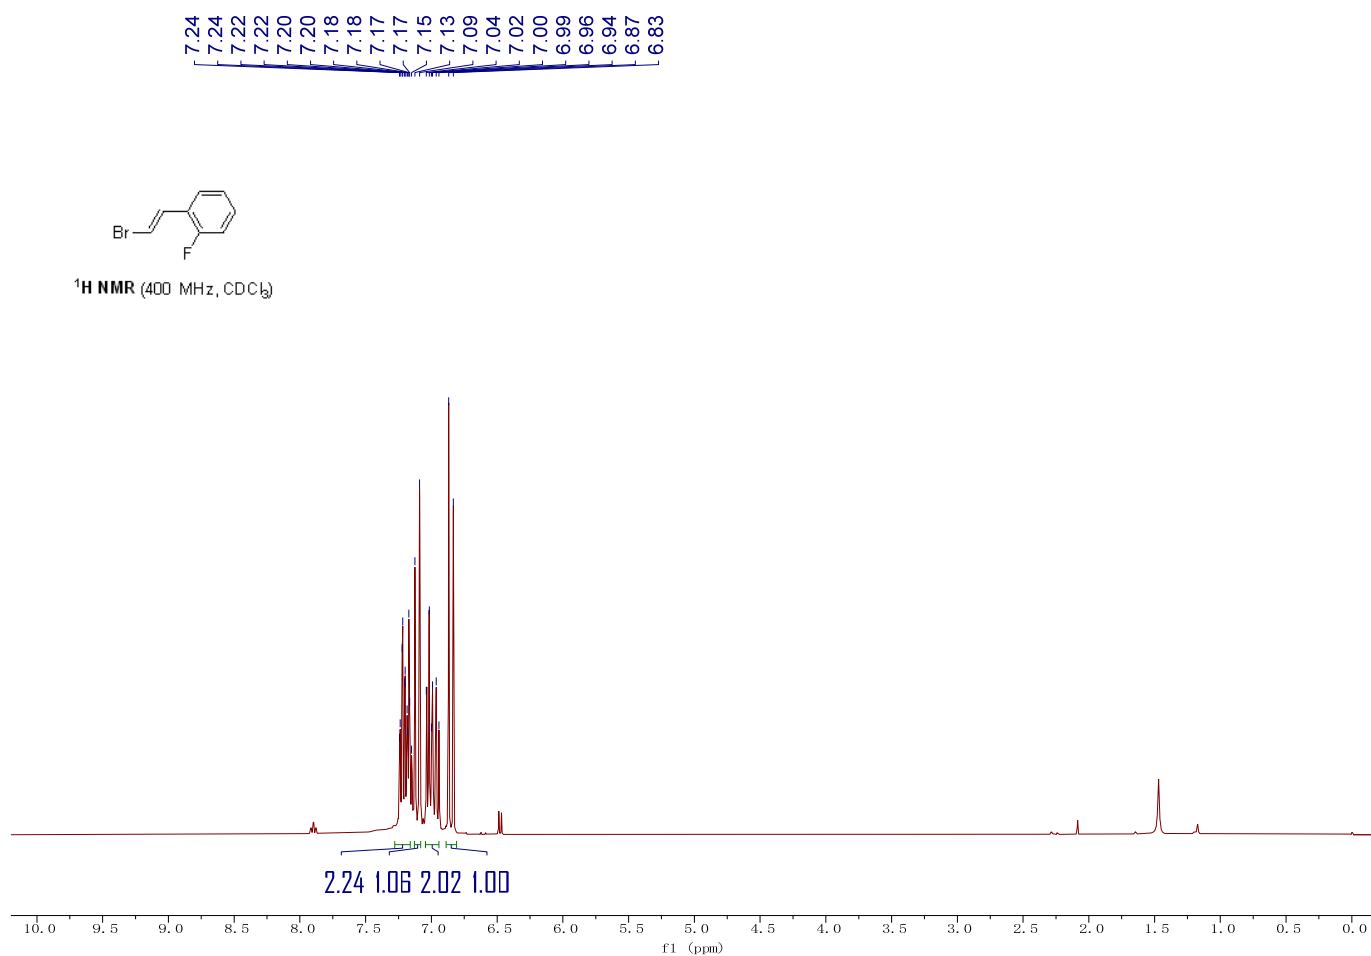

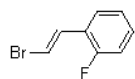

$^{13}\text{C}$  NMR (101 MHz,  $\text{CDCl}_3$ )

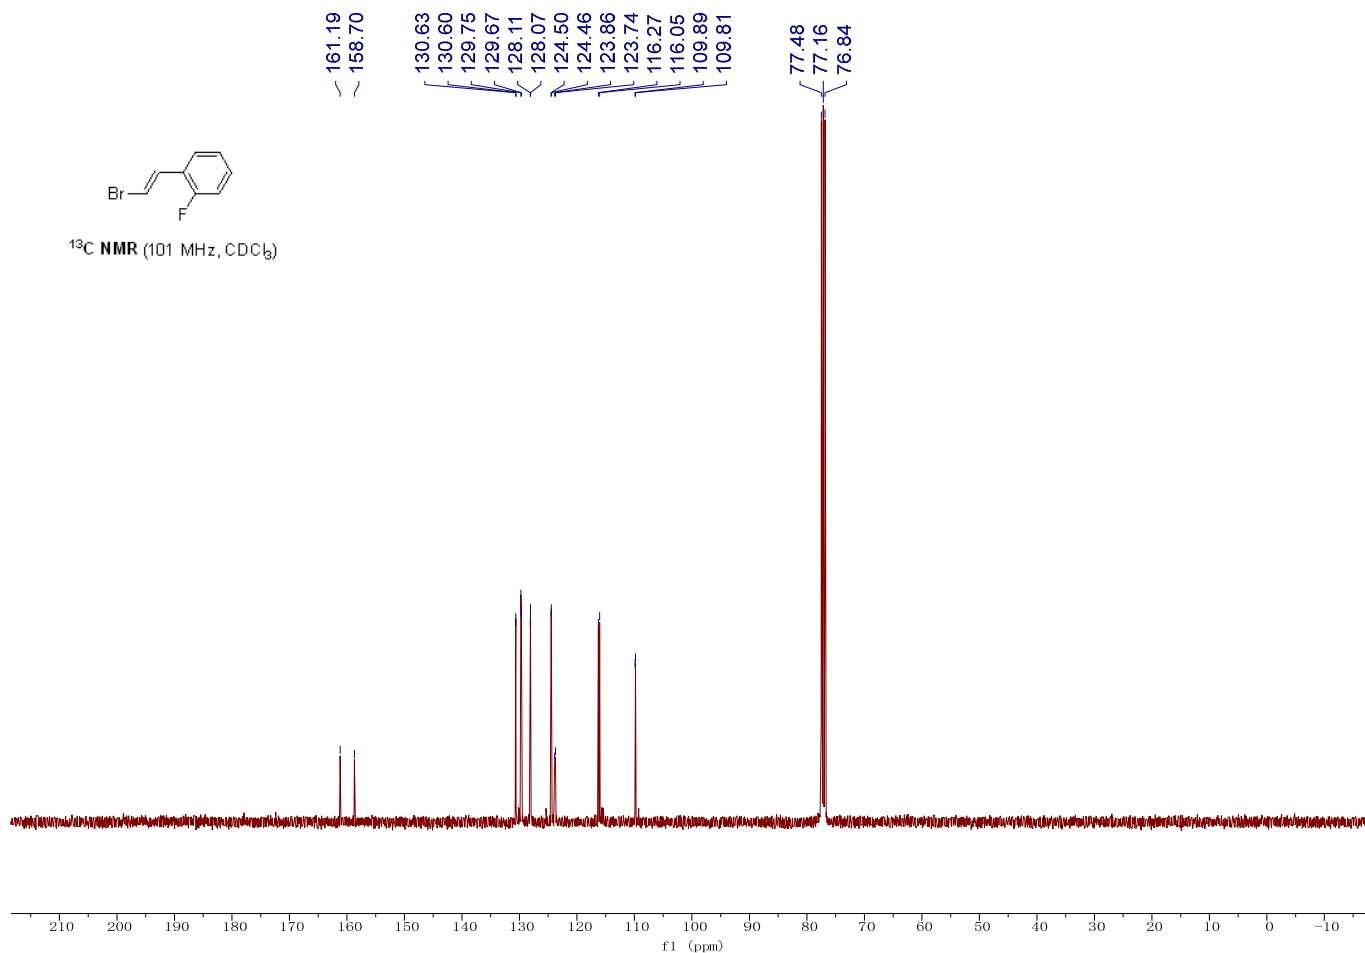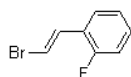

$^{19}\text{F}$  NMR (376 MHz,  $\text{CDCl}_3$ )

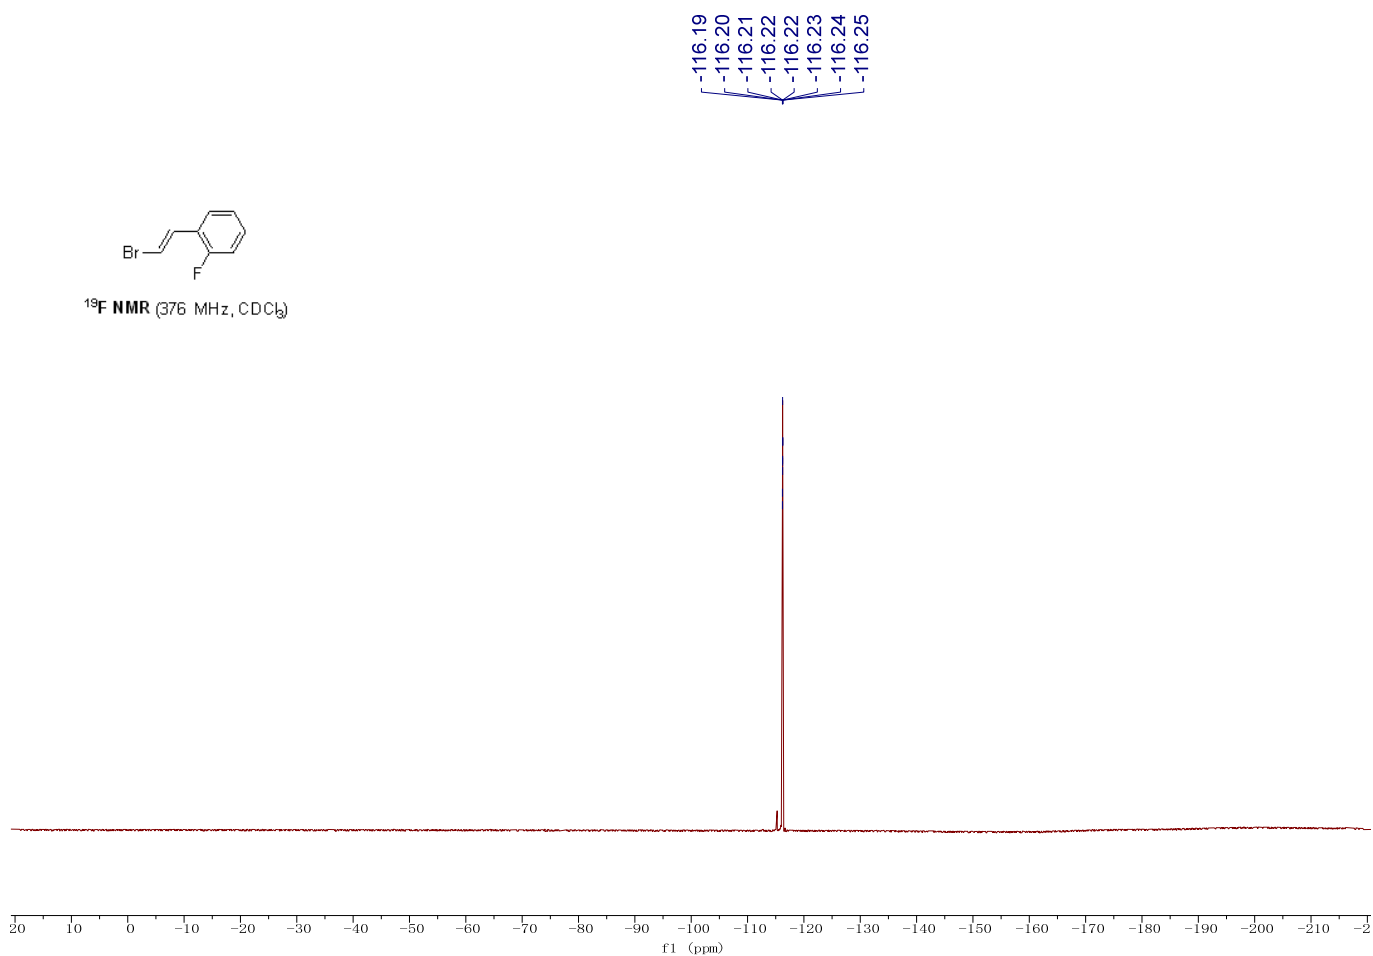

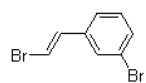

$^1\text{H}$  NMR (400 MHz,  $\text{CDCl}_3$ )

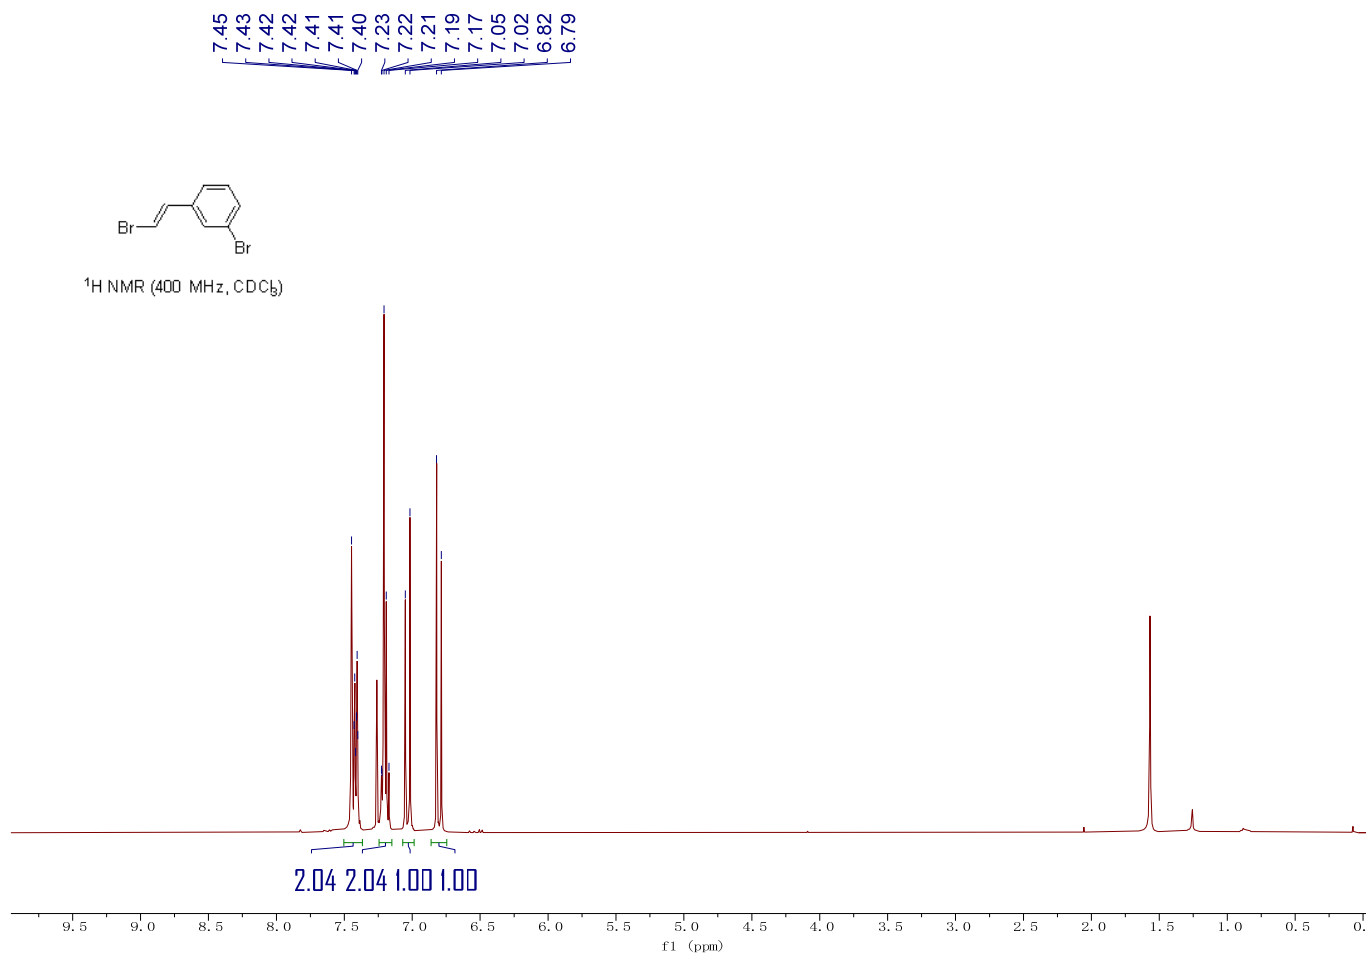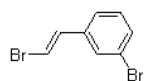

$^{13}\text{C}$  NMR (101 MHz,  $\text{CDCl}_3$ )

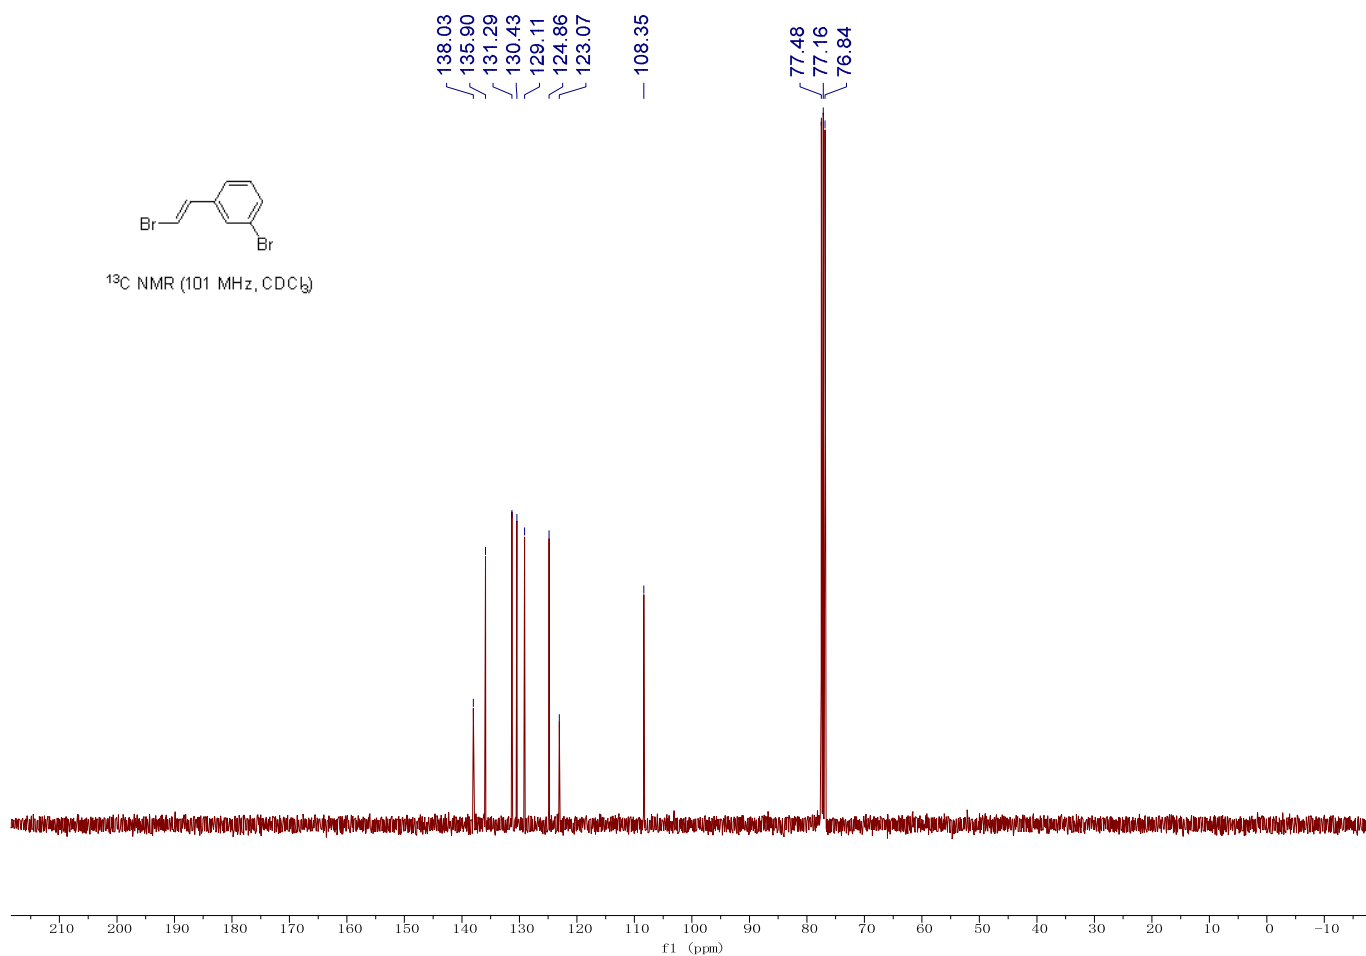

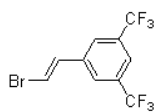

<sup>1</sup>H NMR (400 MHz, CDCl<sub>3</sub>)

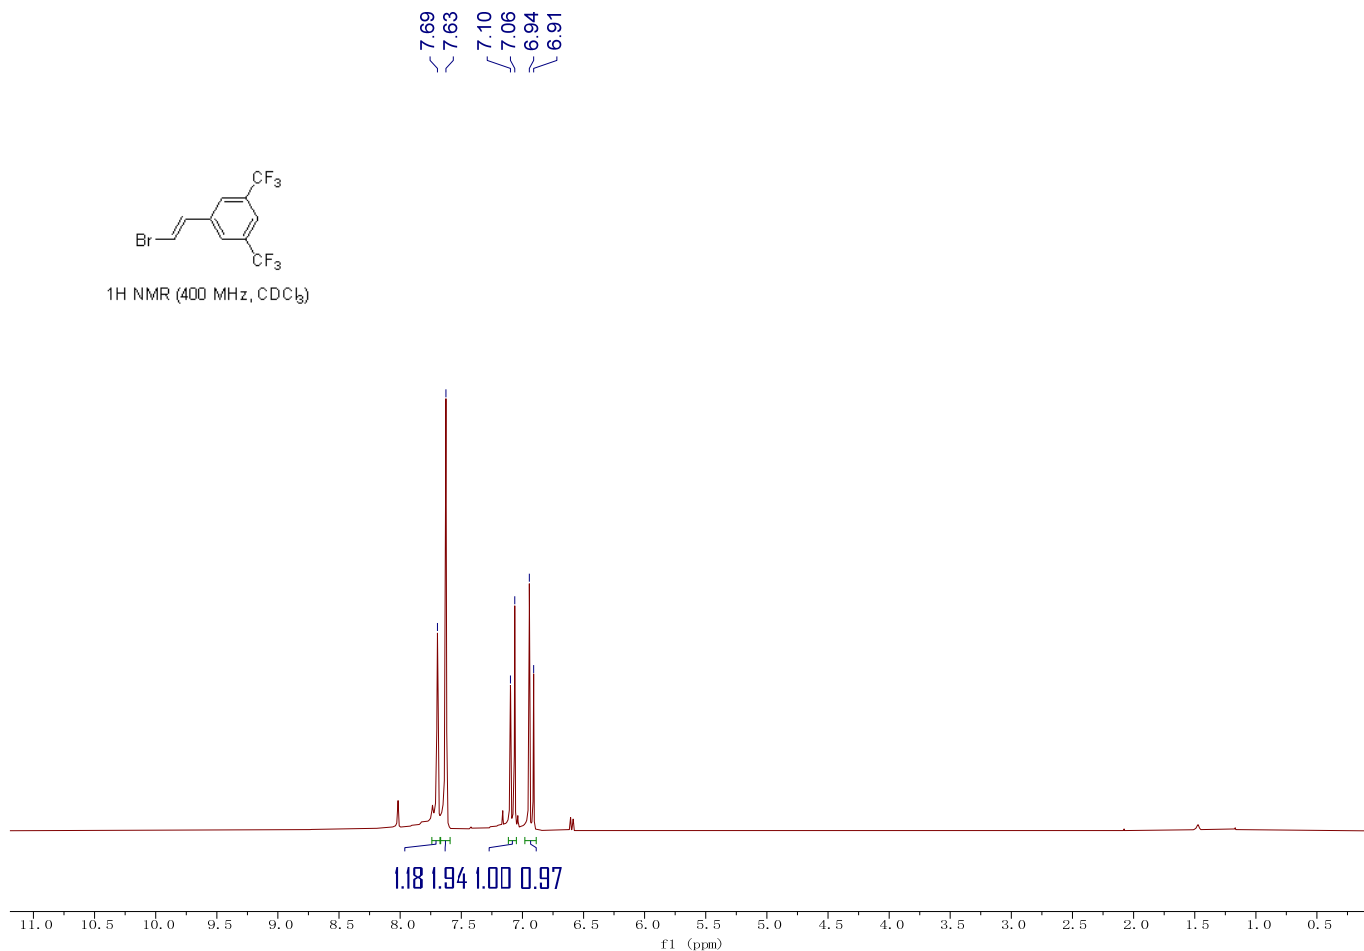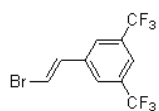

<sup>13</sup>C NMR (151 MHz, CDCl<sub>3</sub>)

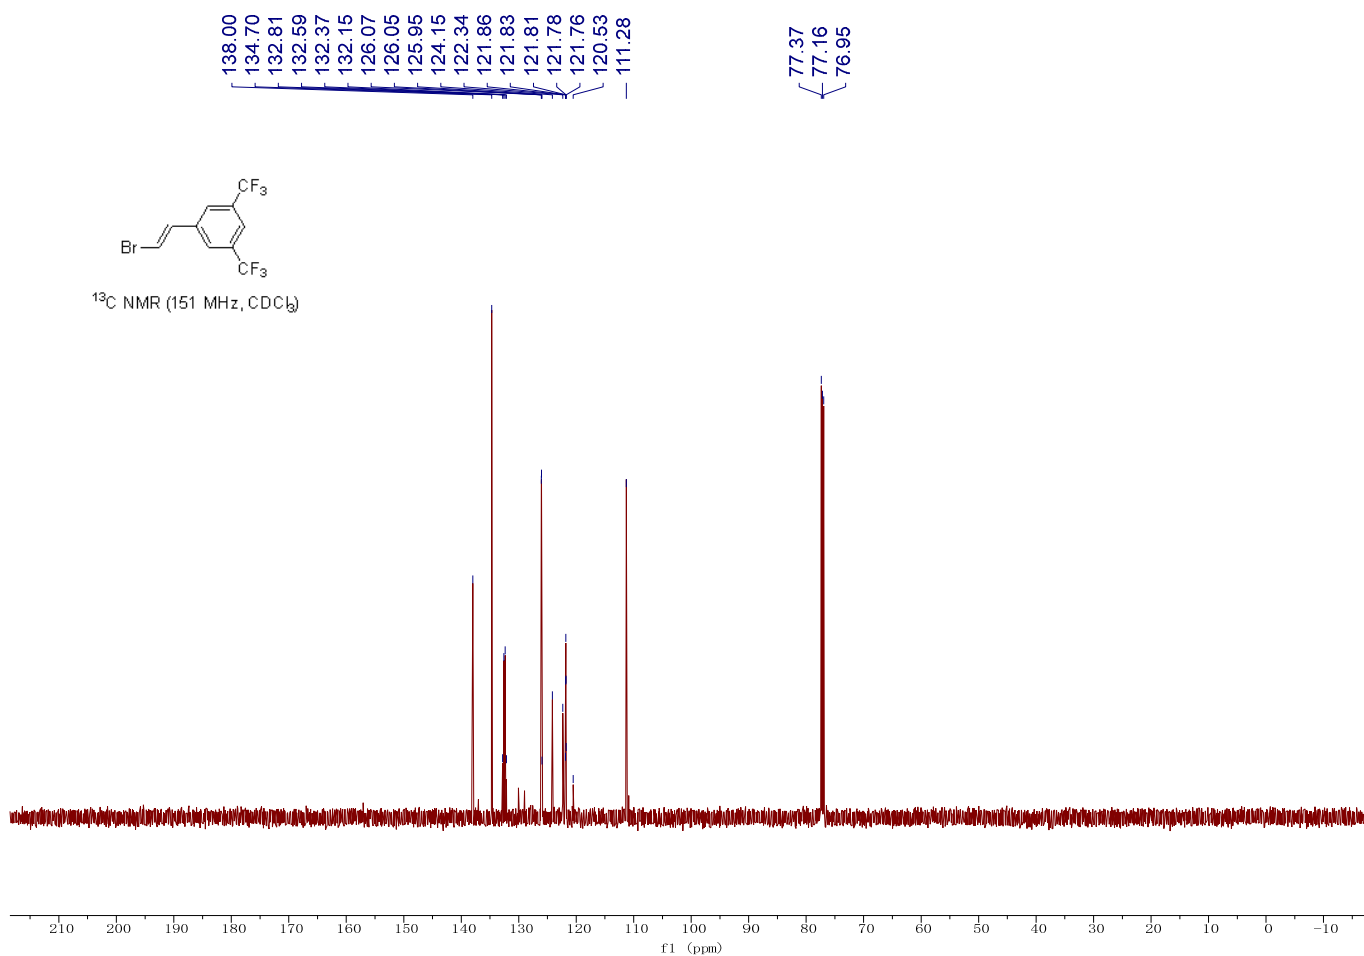

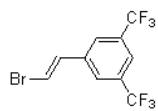

$^{19}\text{F}$  NMR (376 MHz,  $\text{CDCl}_3$ )

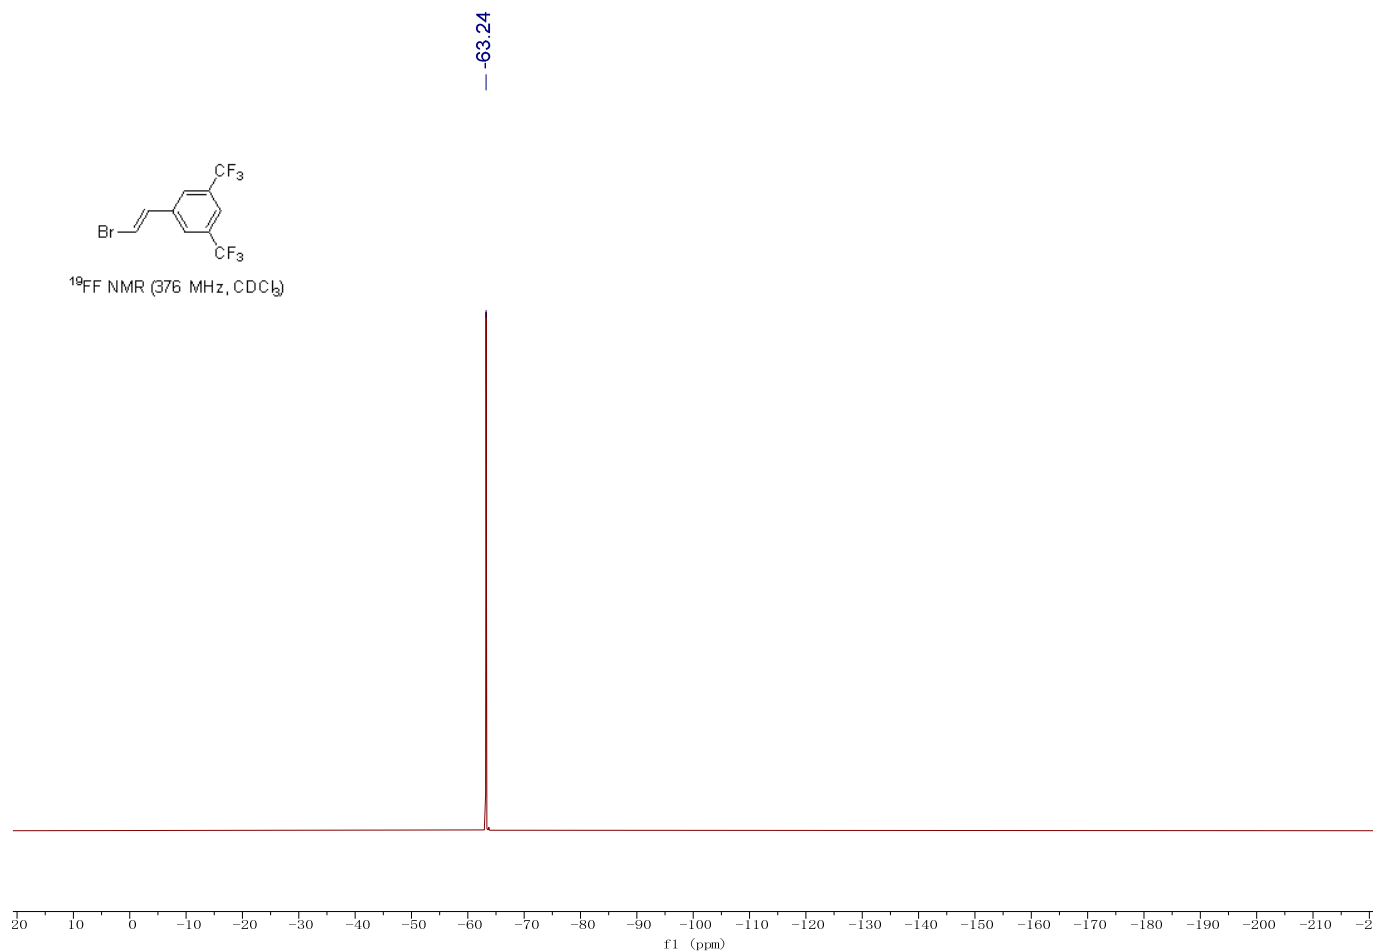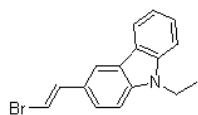

$^1\text{H}$  NMR (400 MHz,  $\text{CDCl}_3$ )

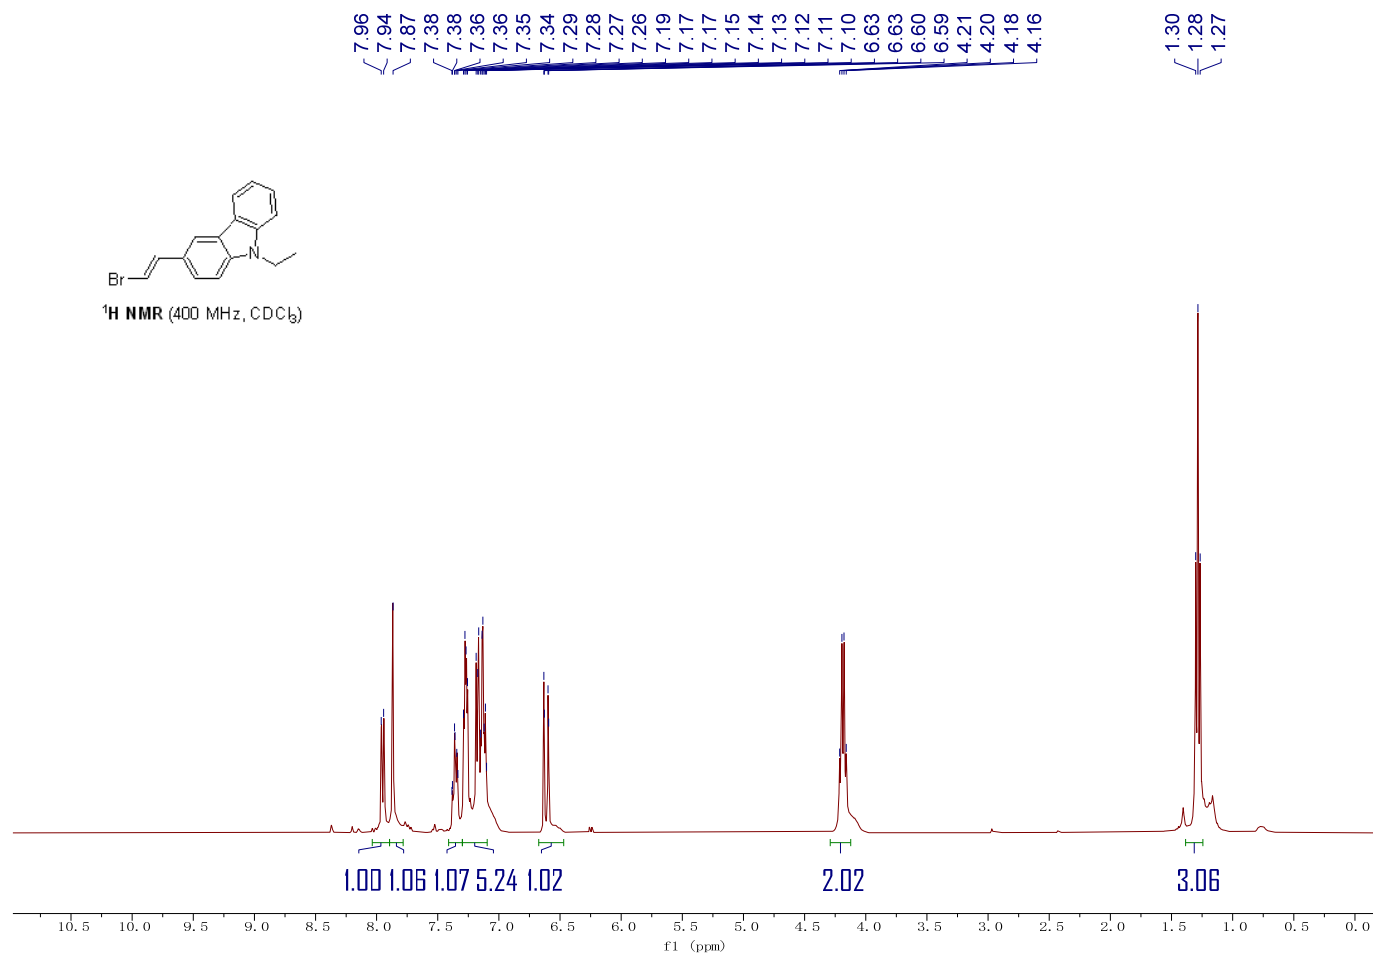

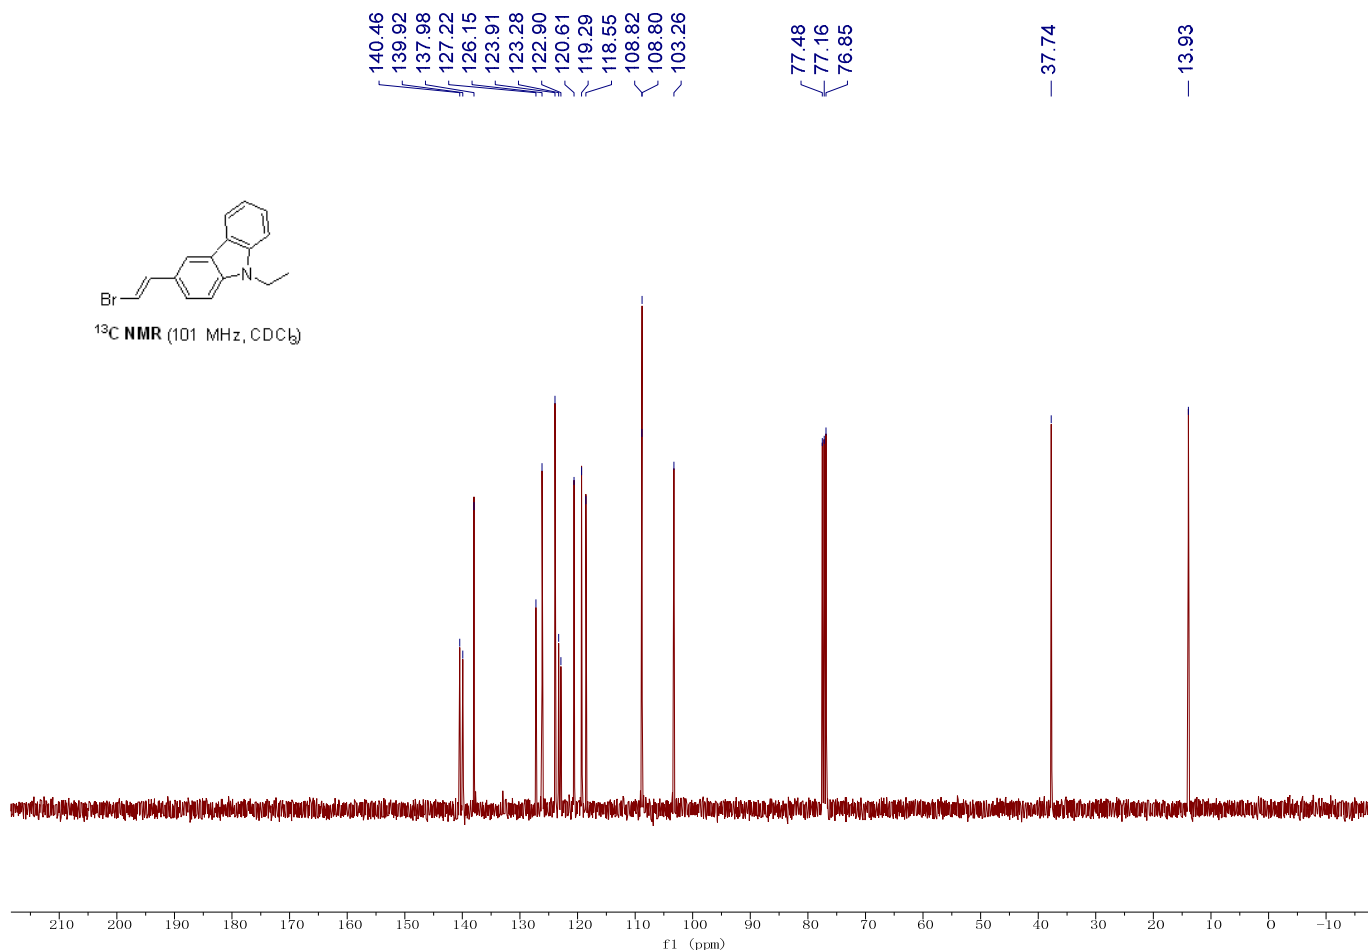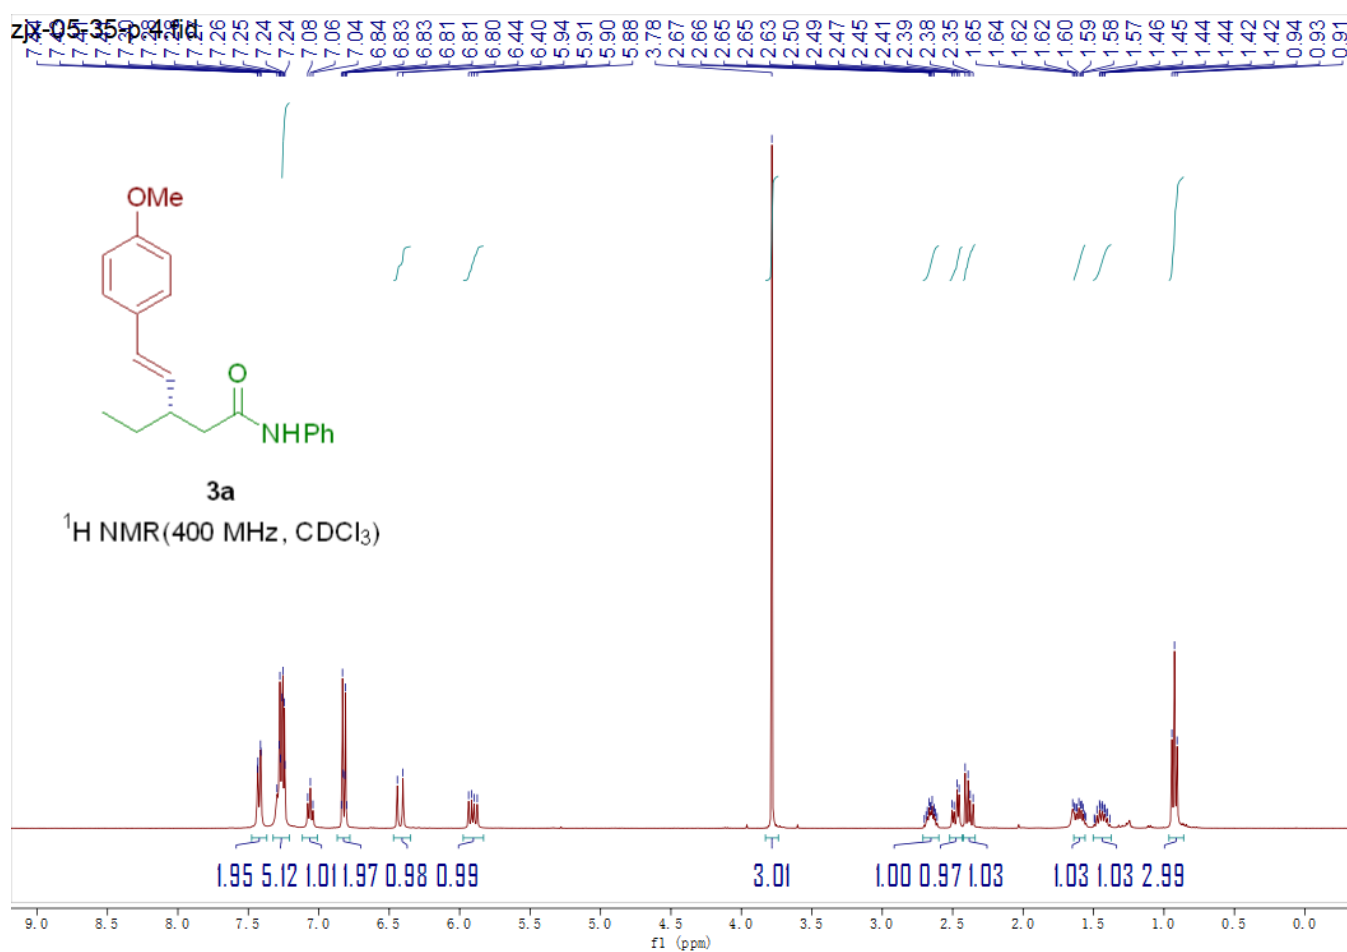



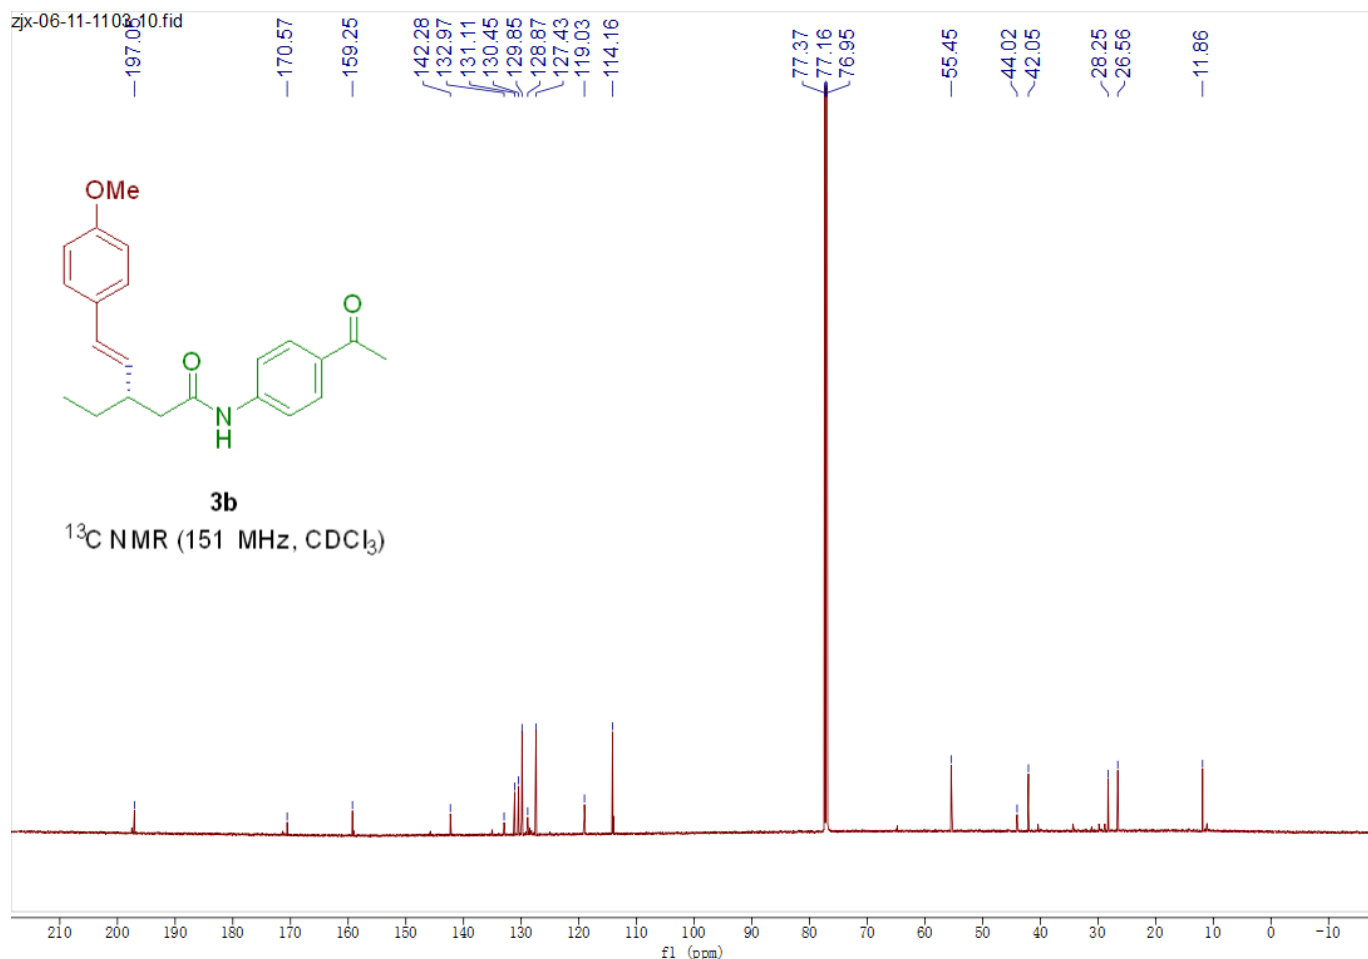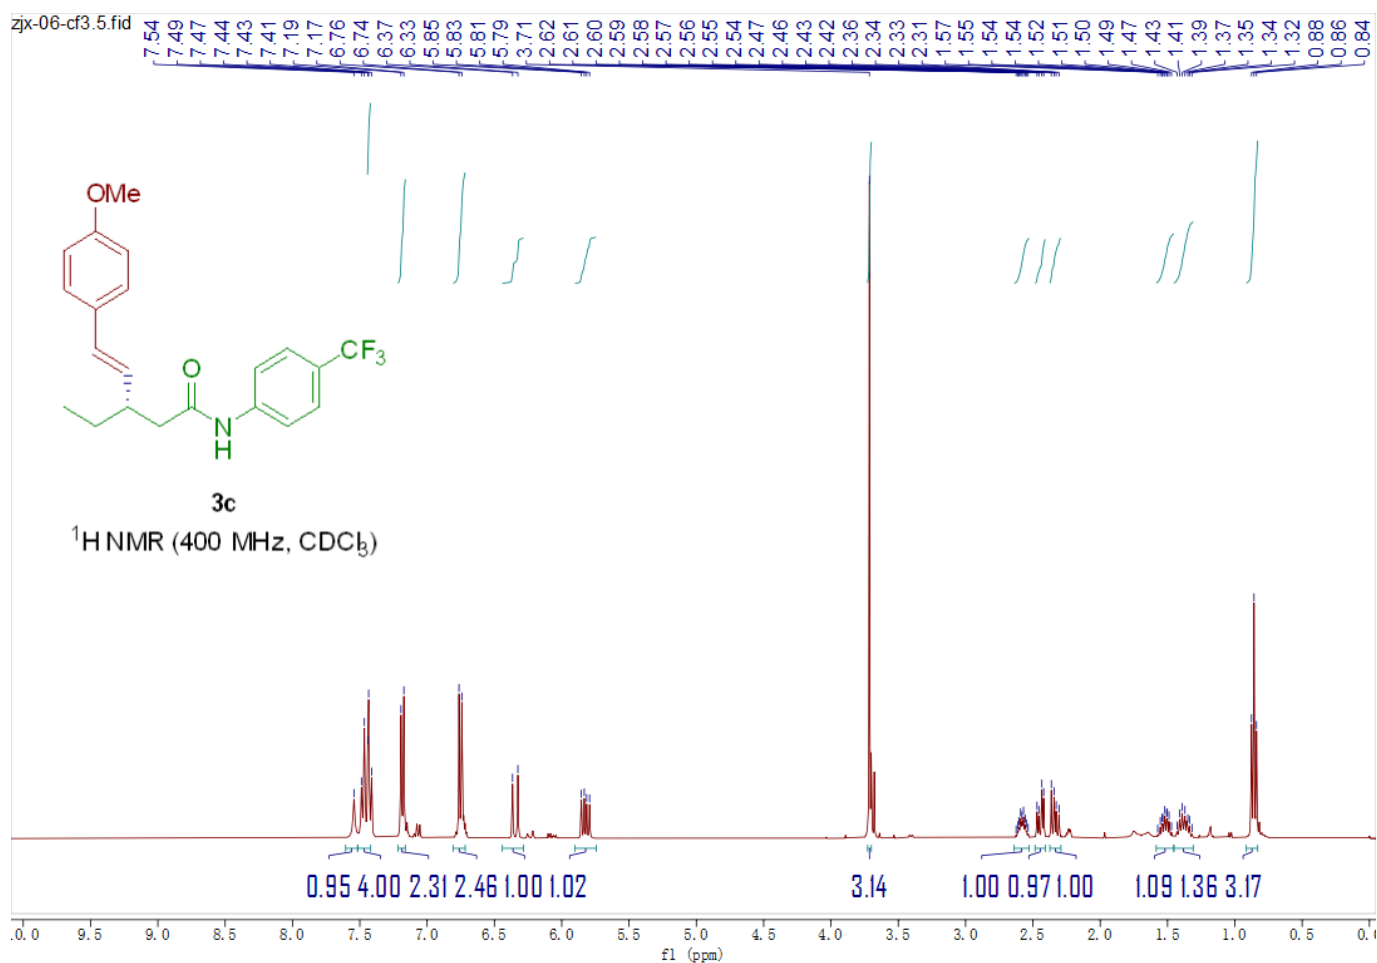



zjx-06-cf3.6.fid

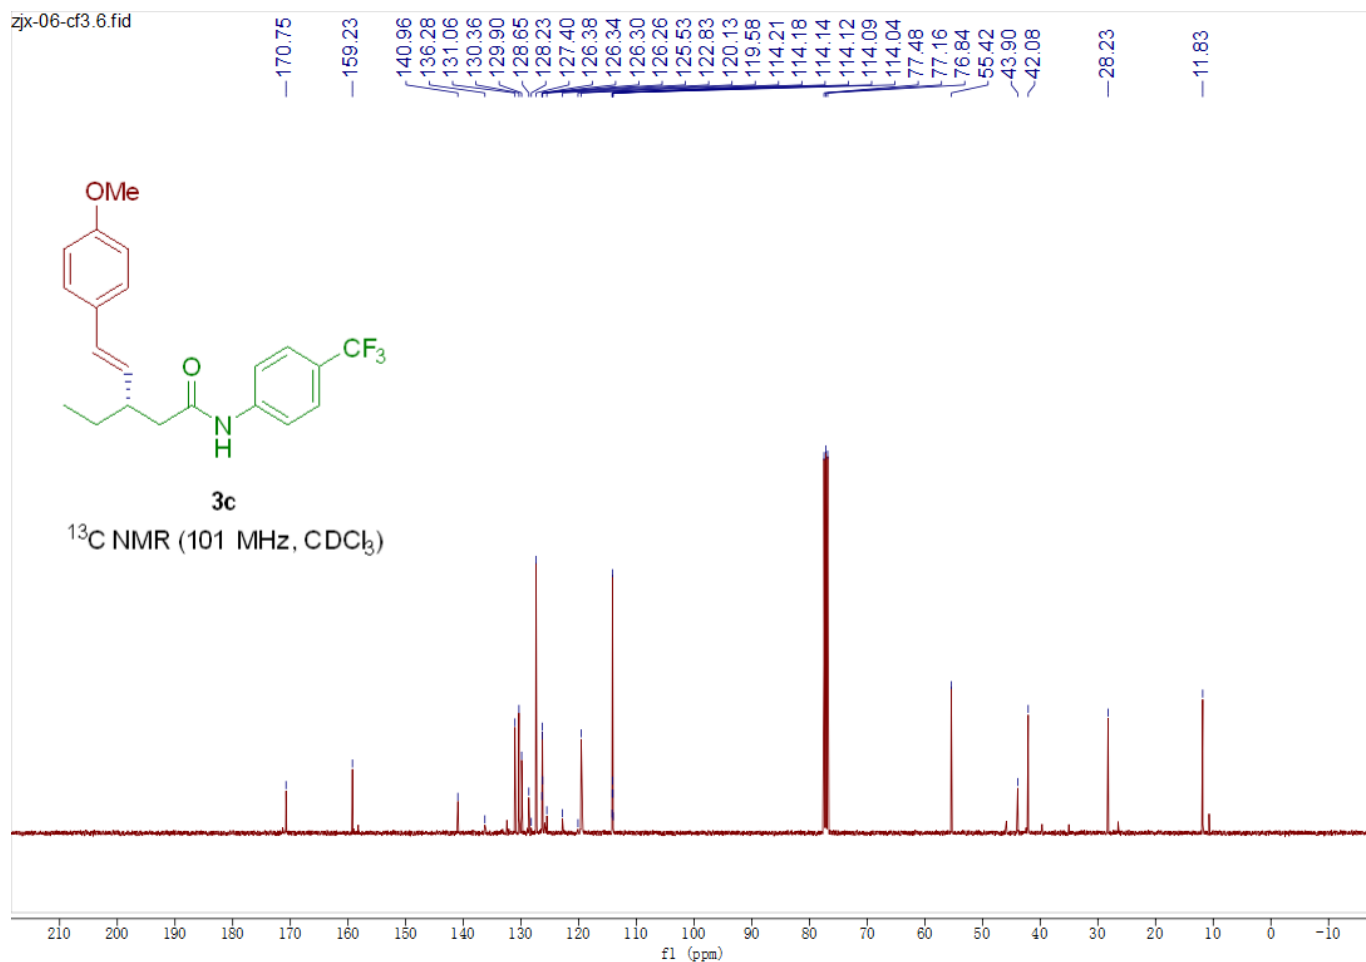

zjx-06-cf3.24.fid

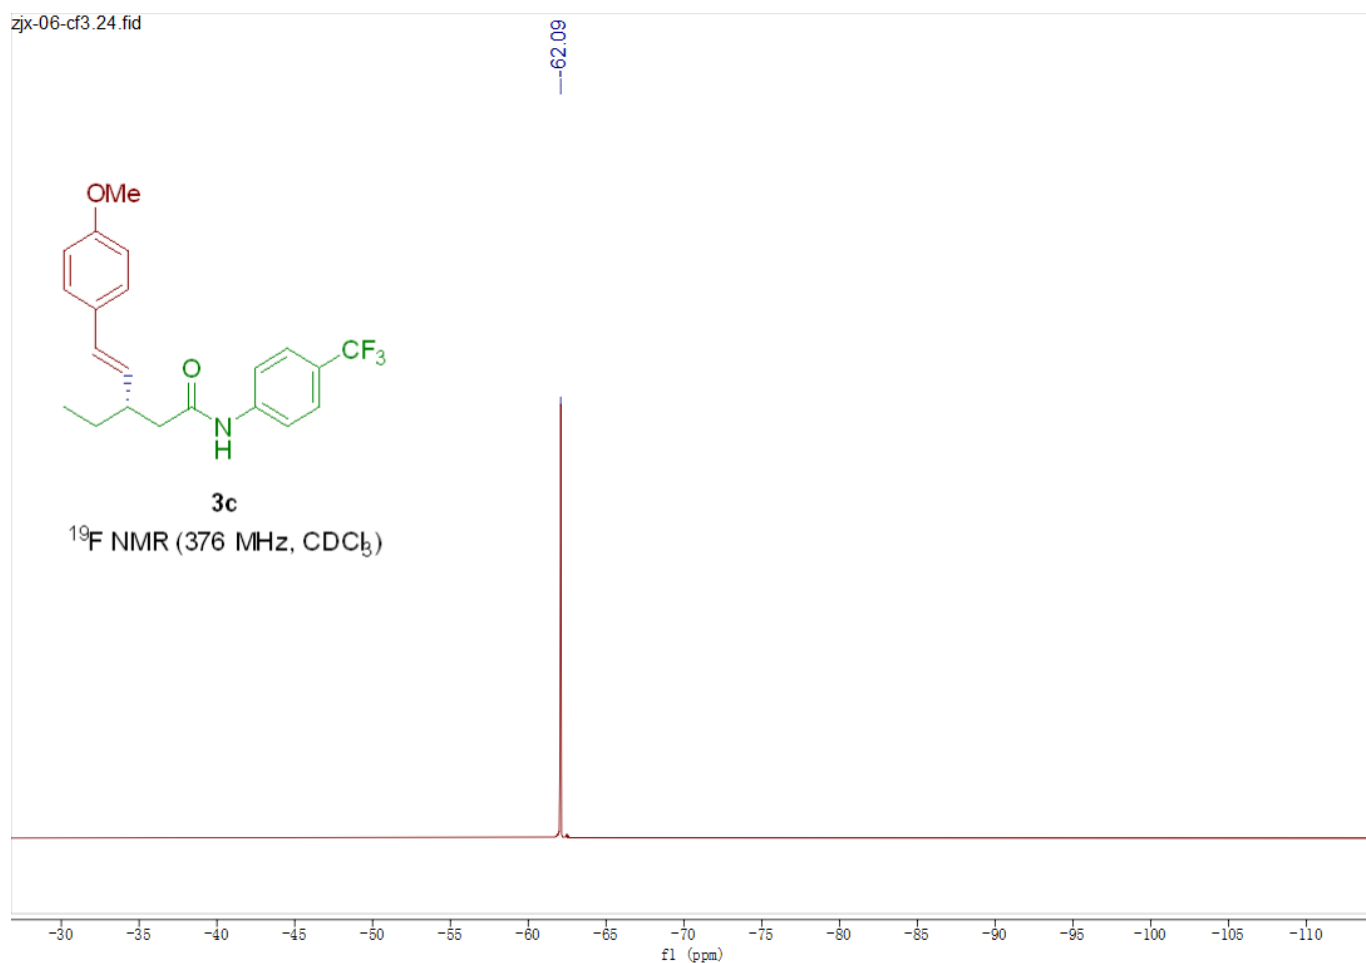

zjx-06-11-1124.1.fid

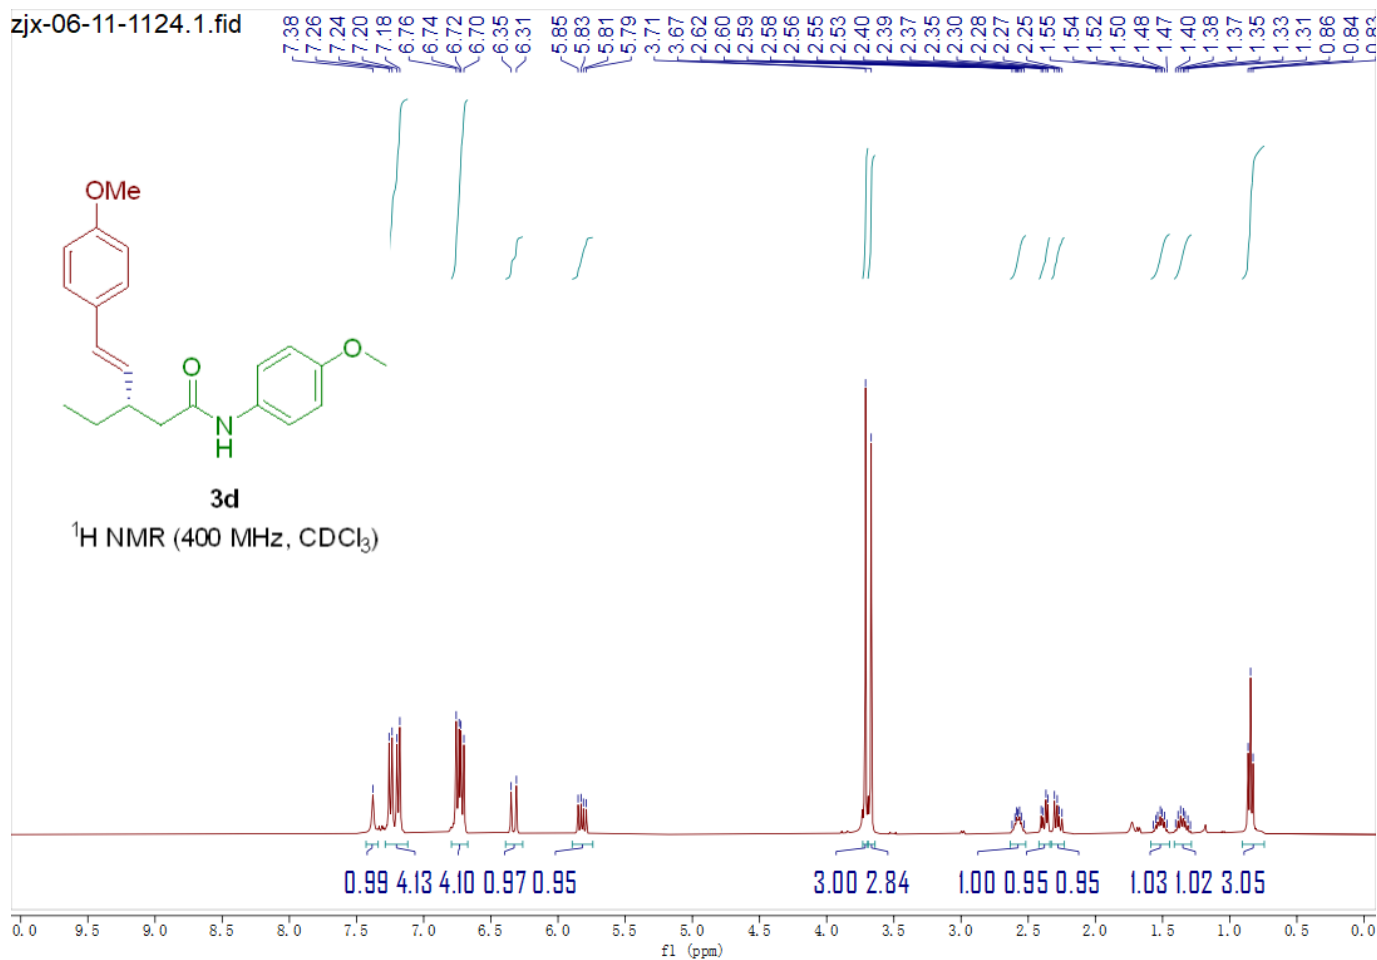

zjx-06-11-1124.2.fid

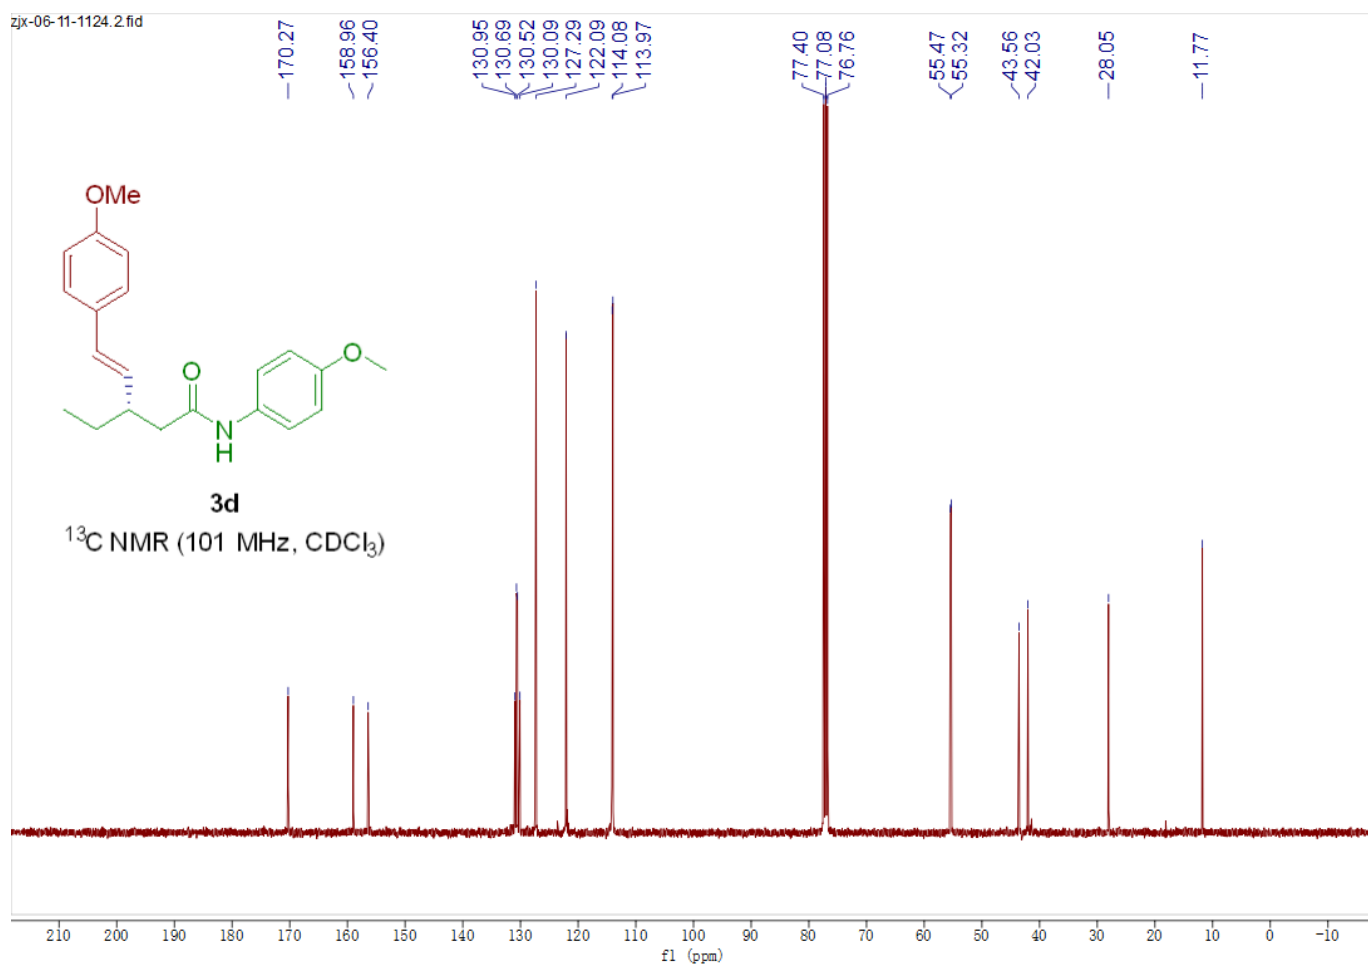

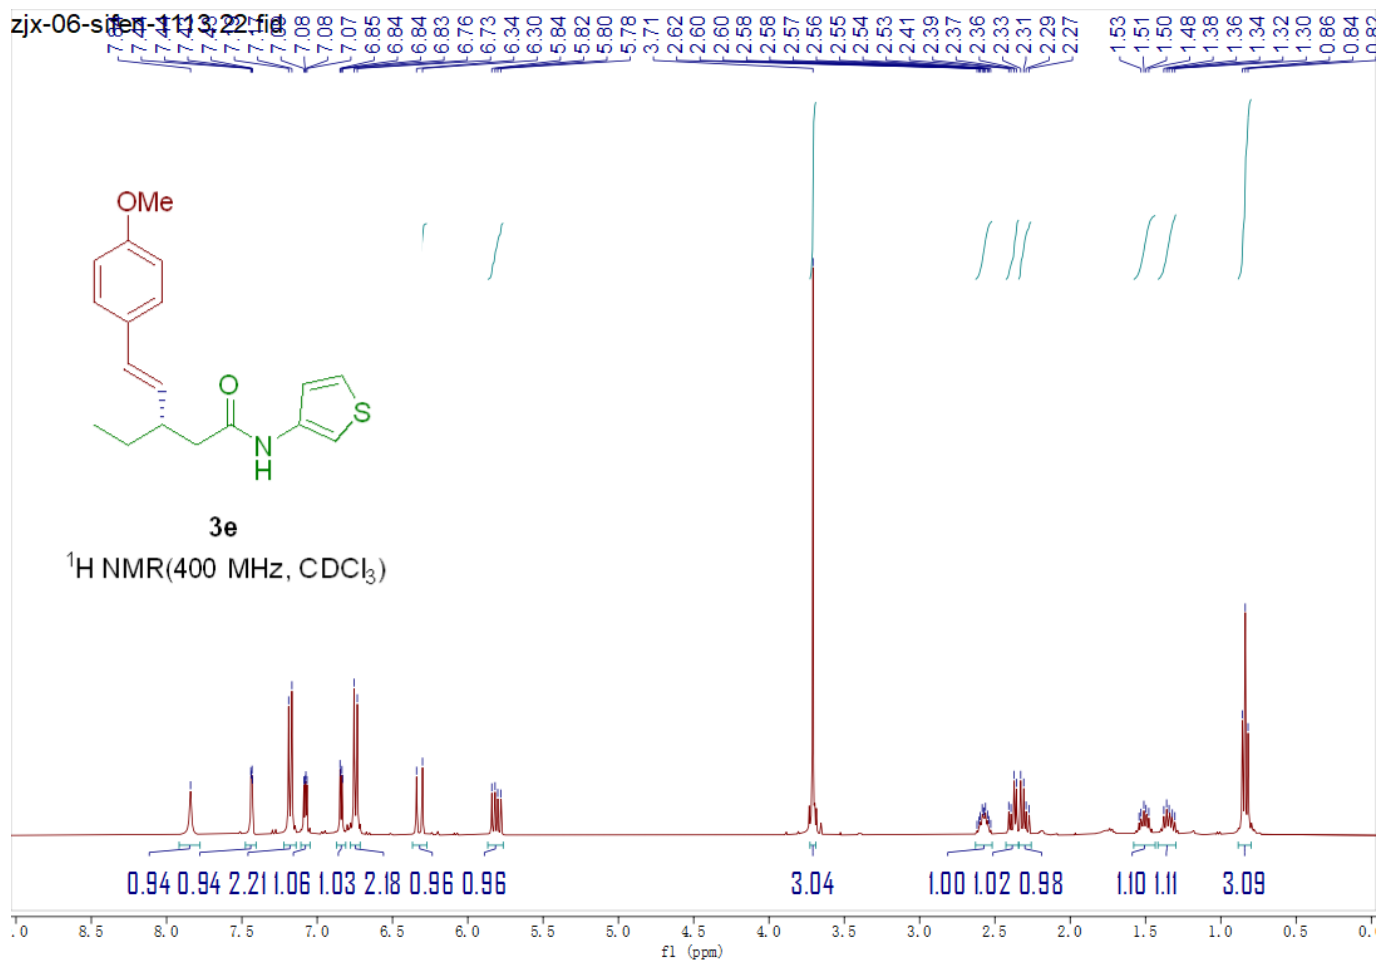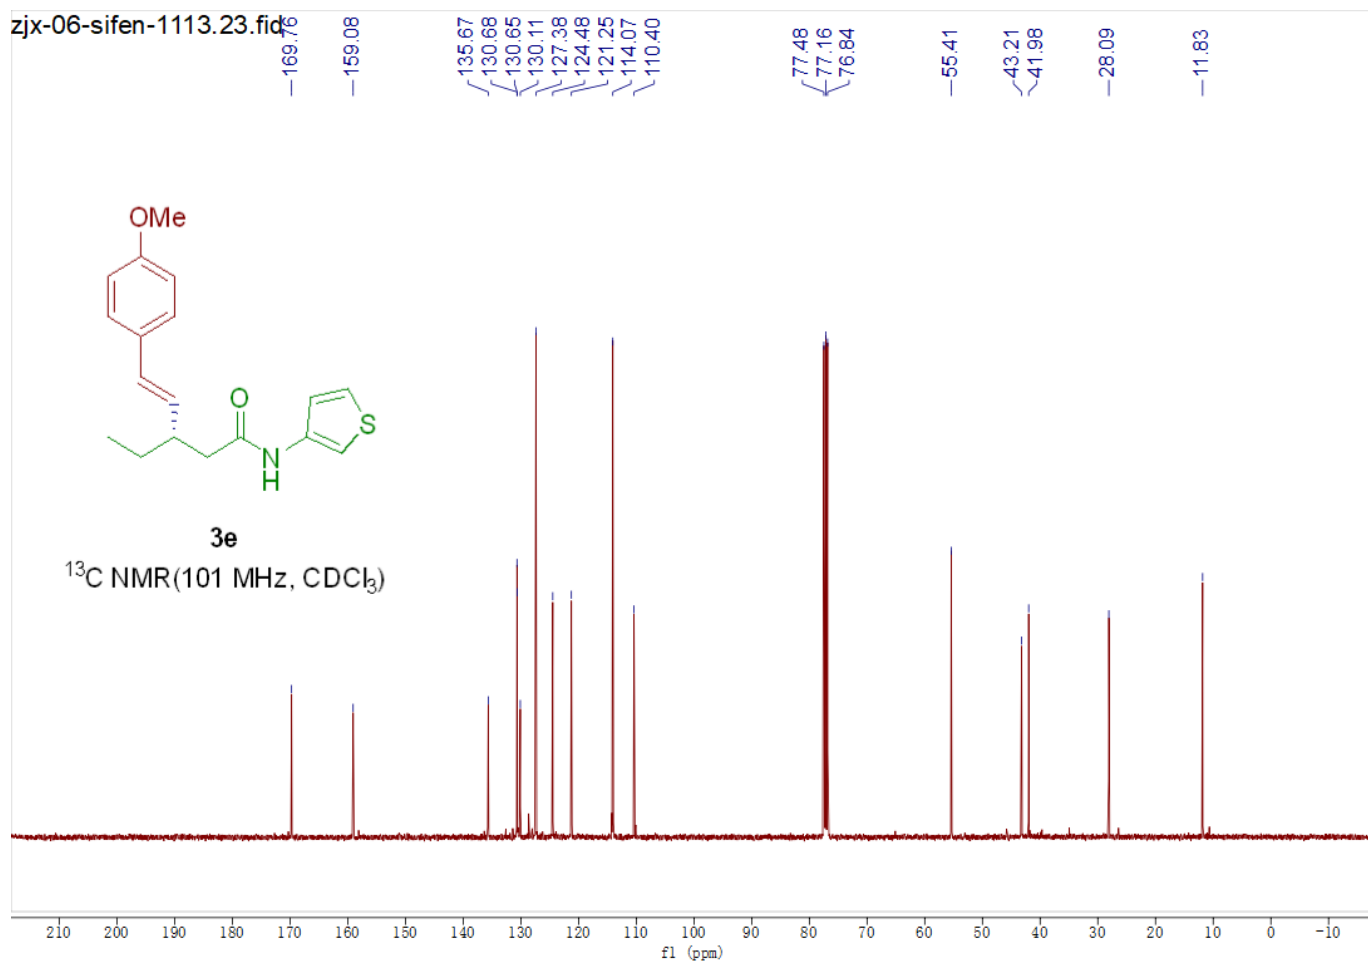

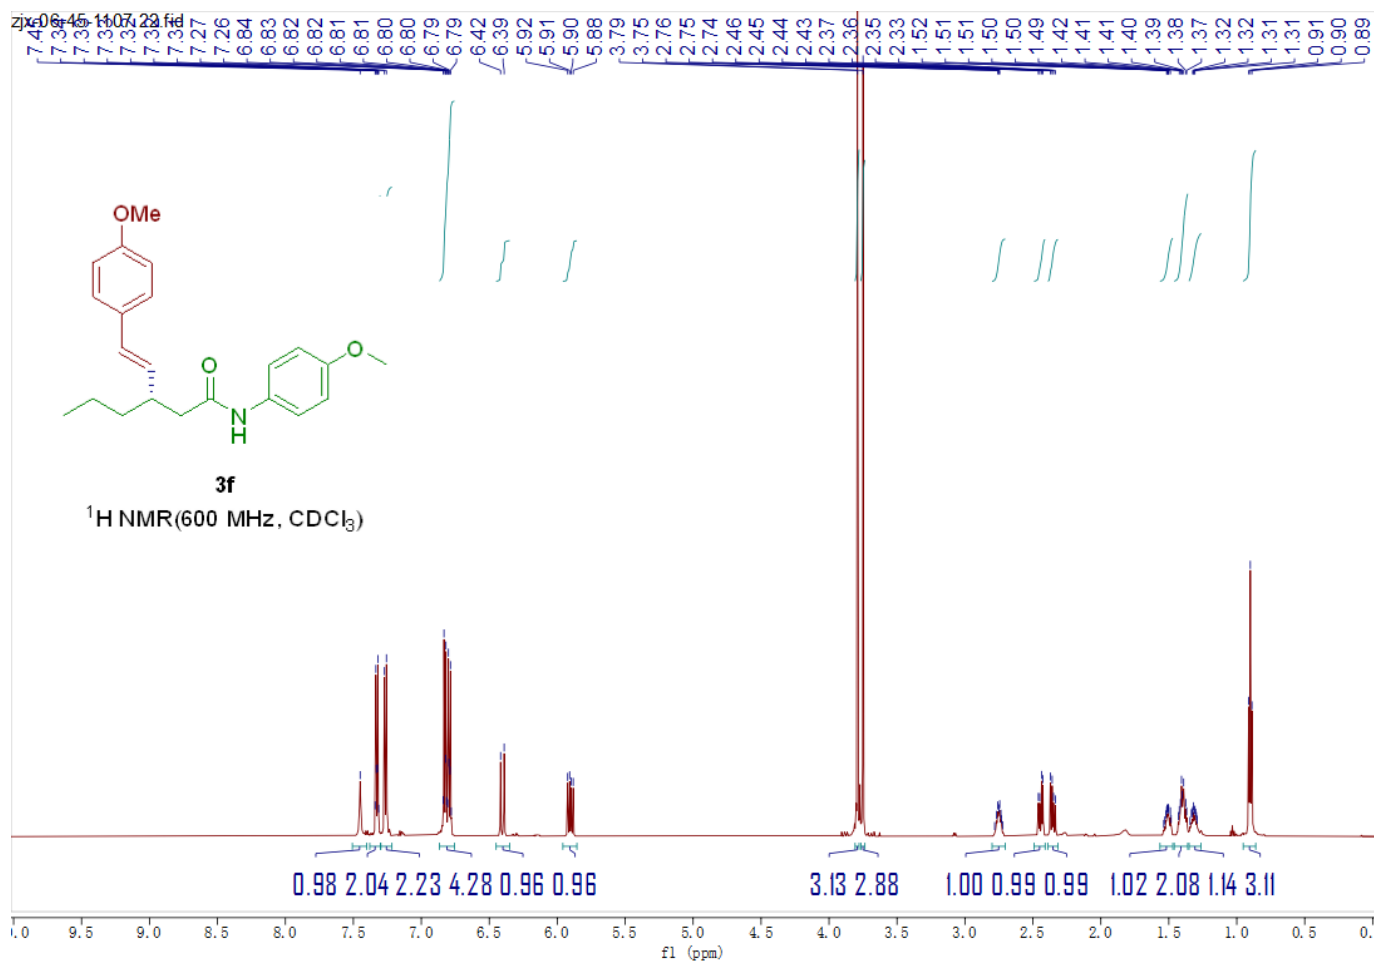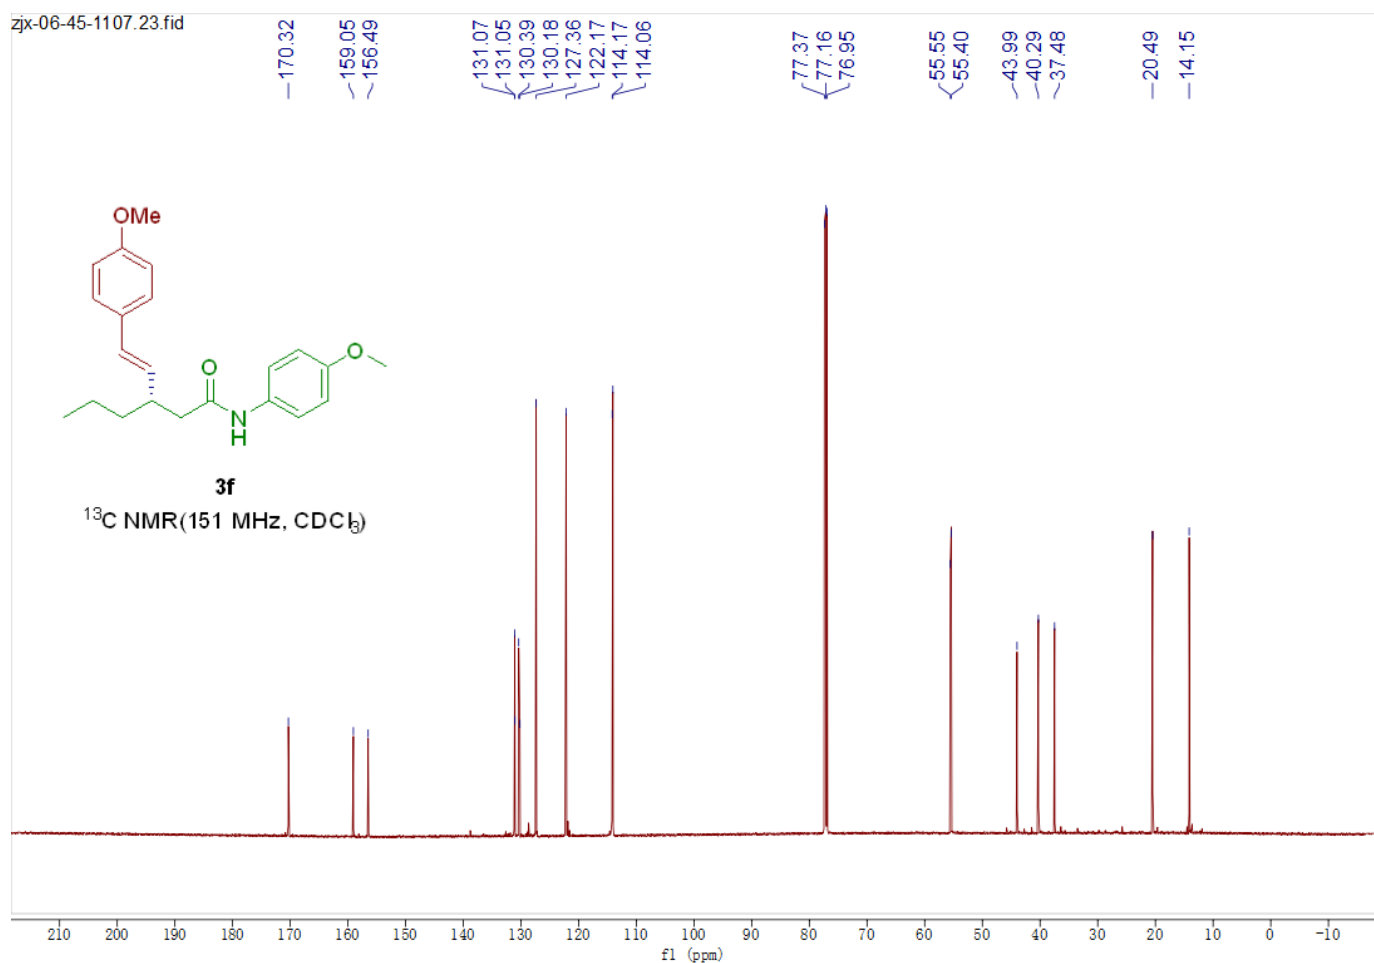

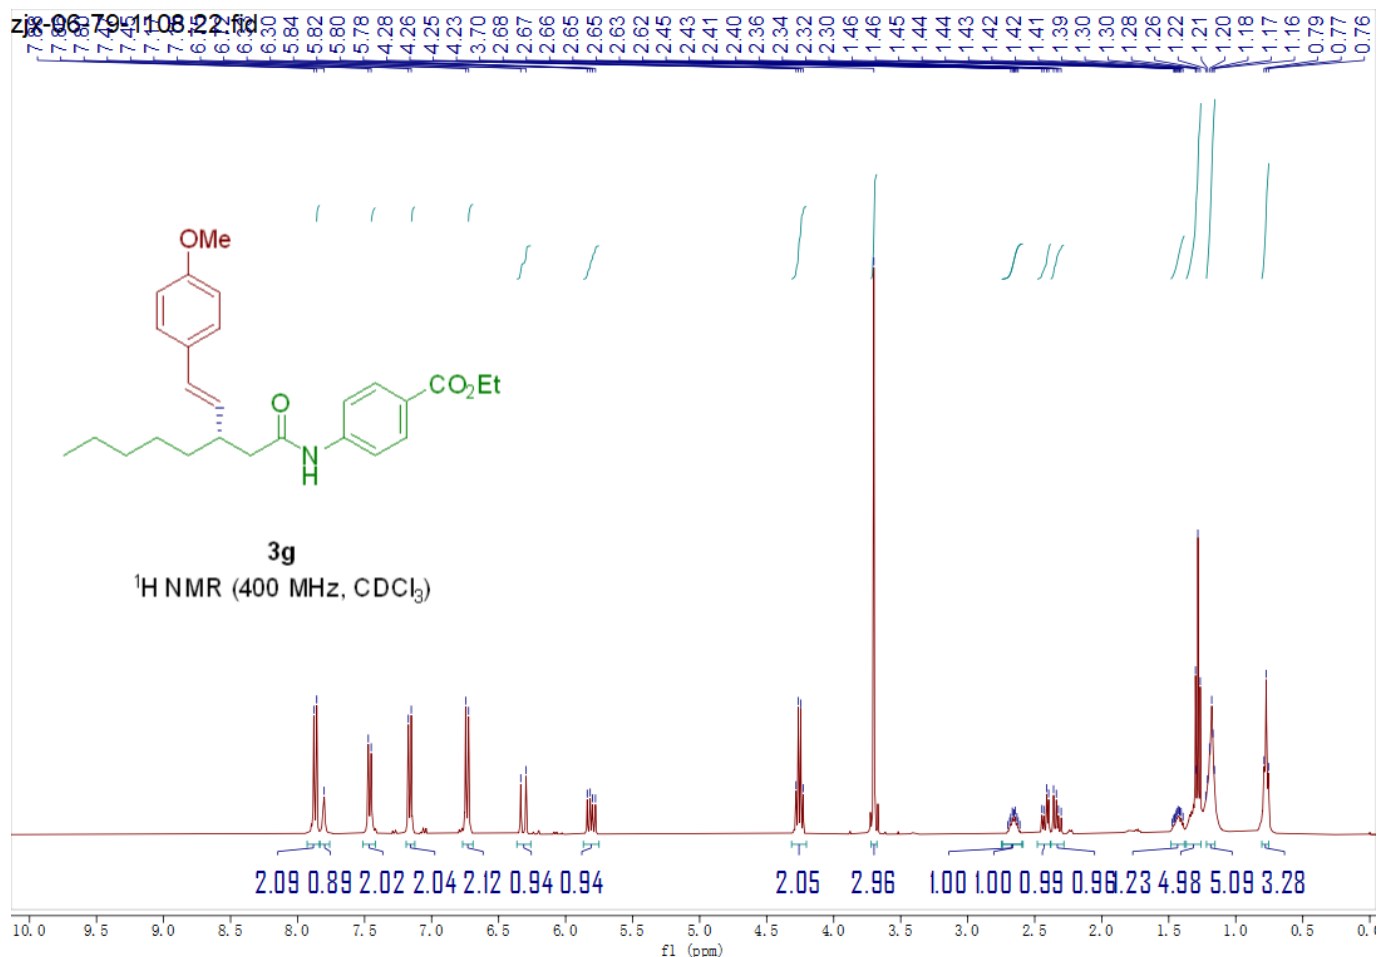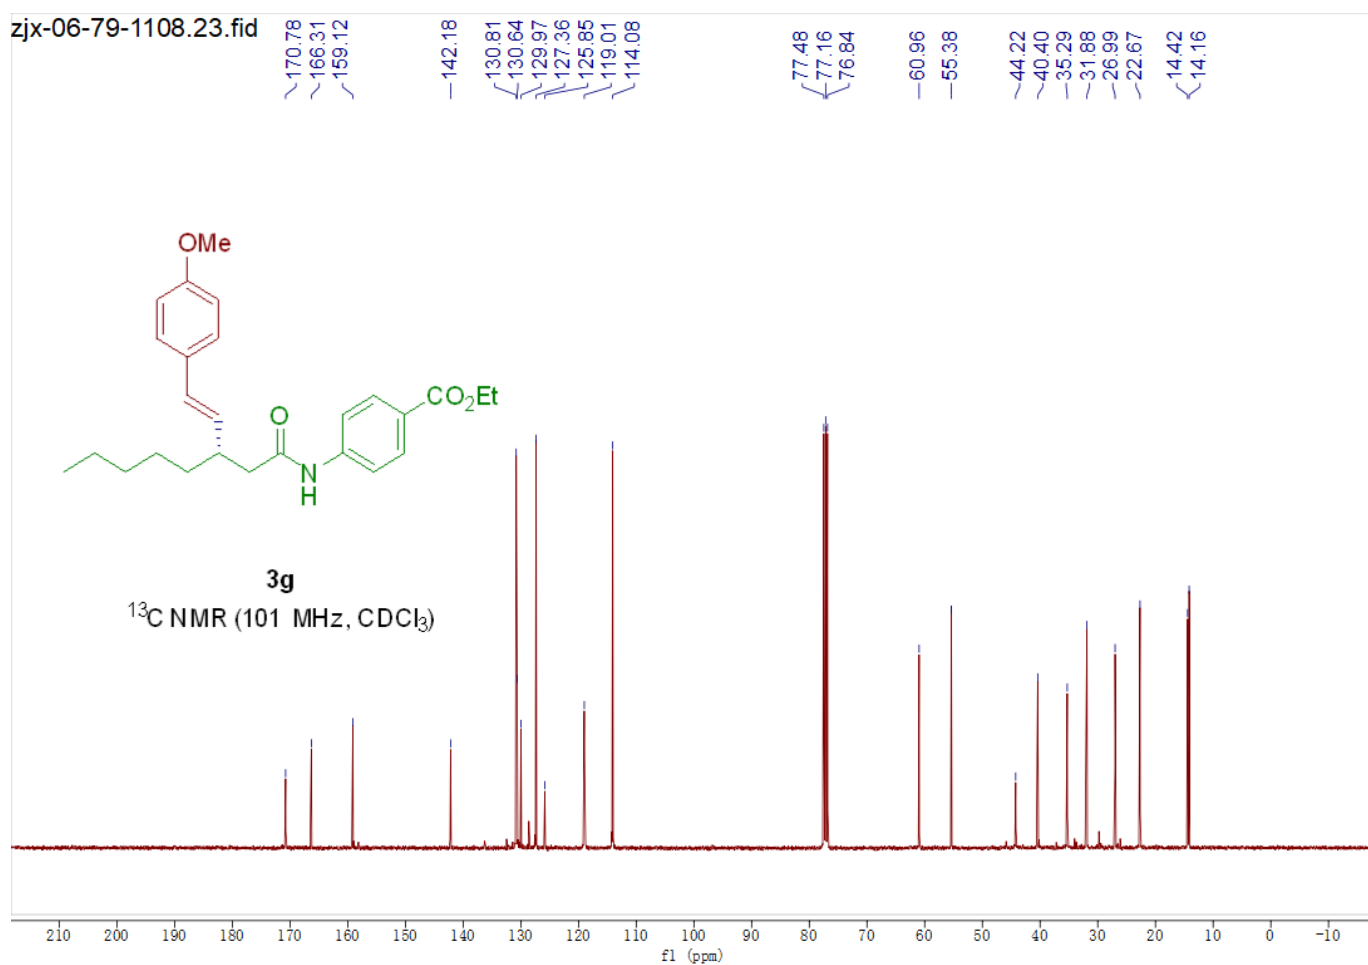

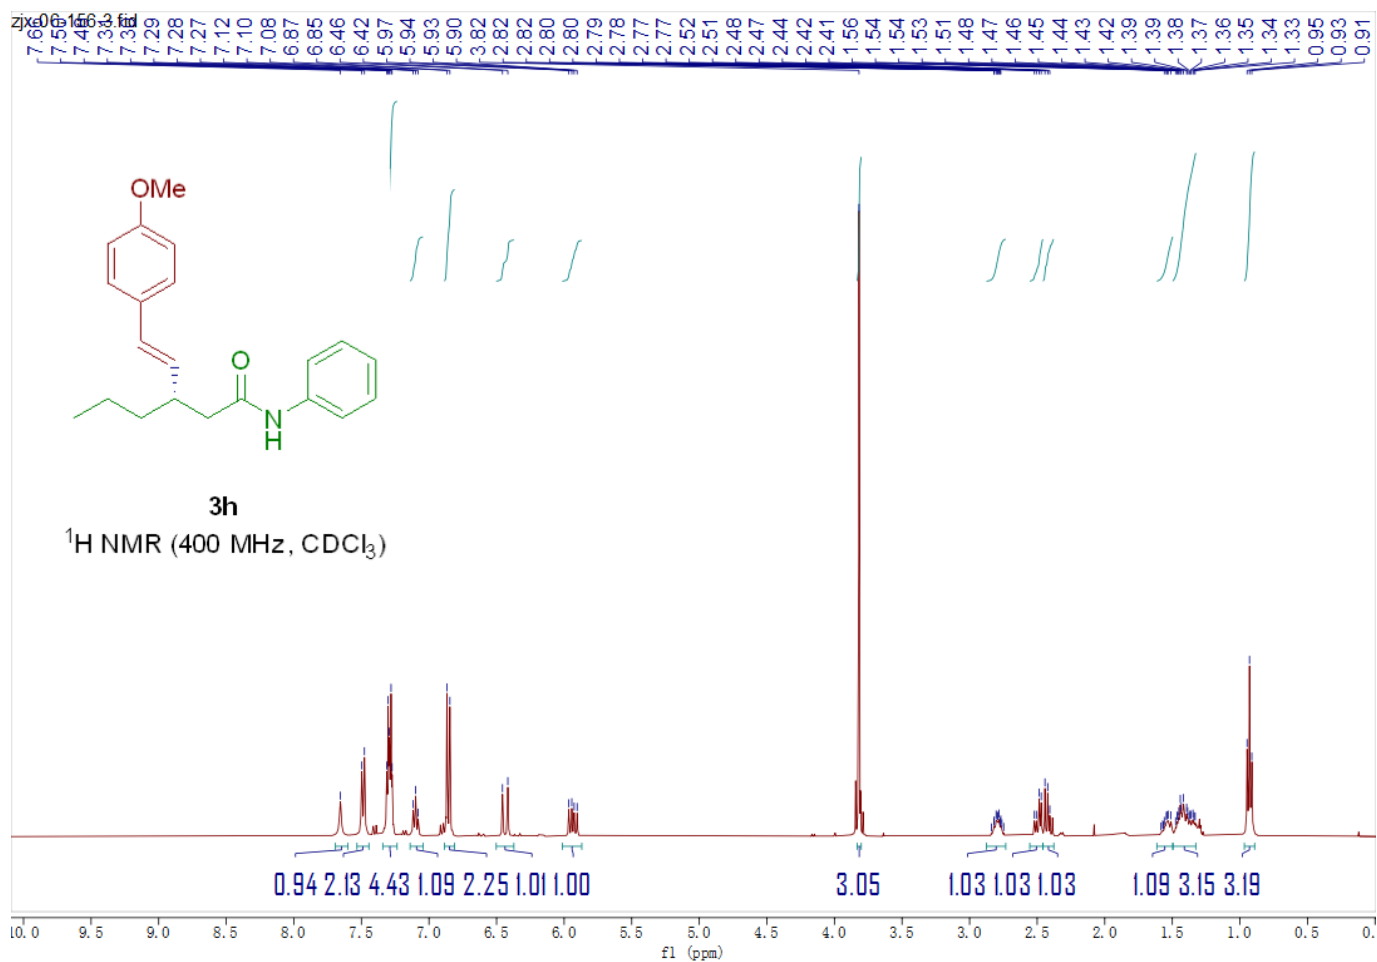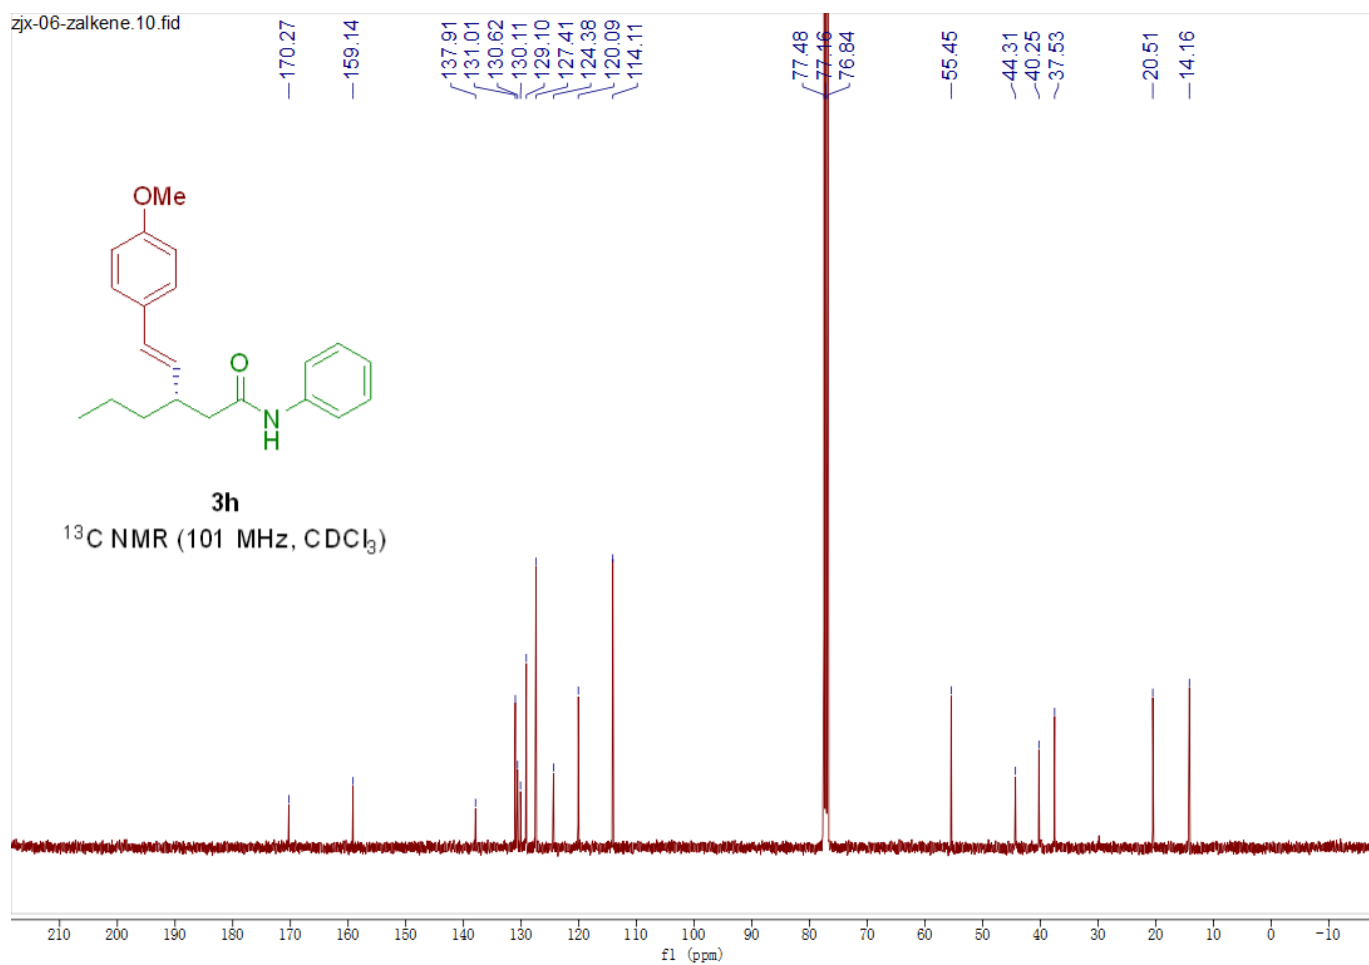

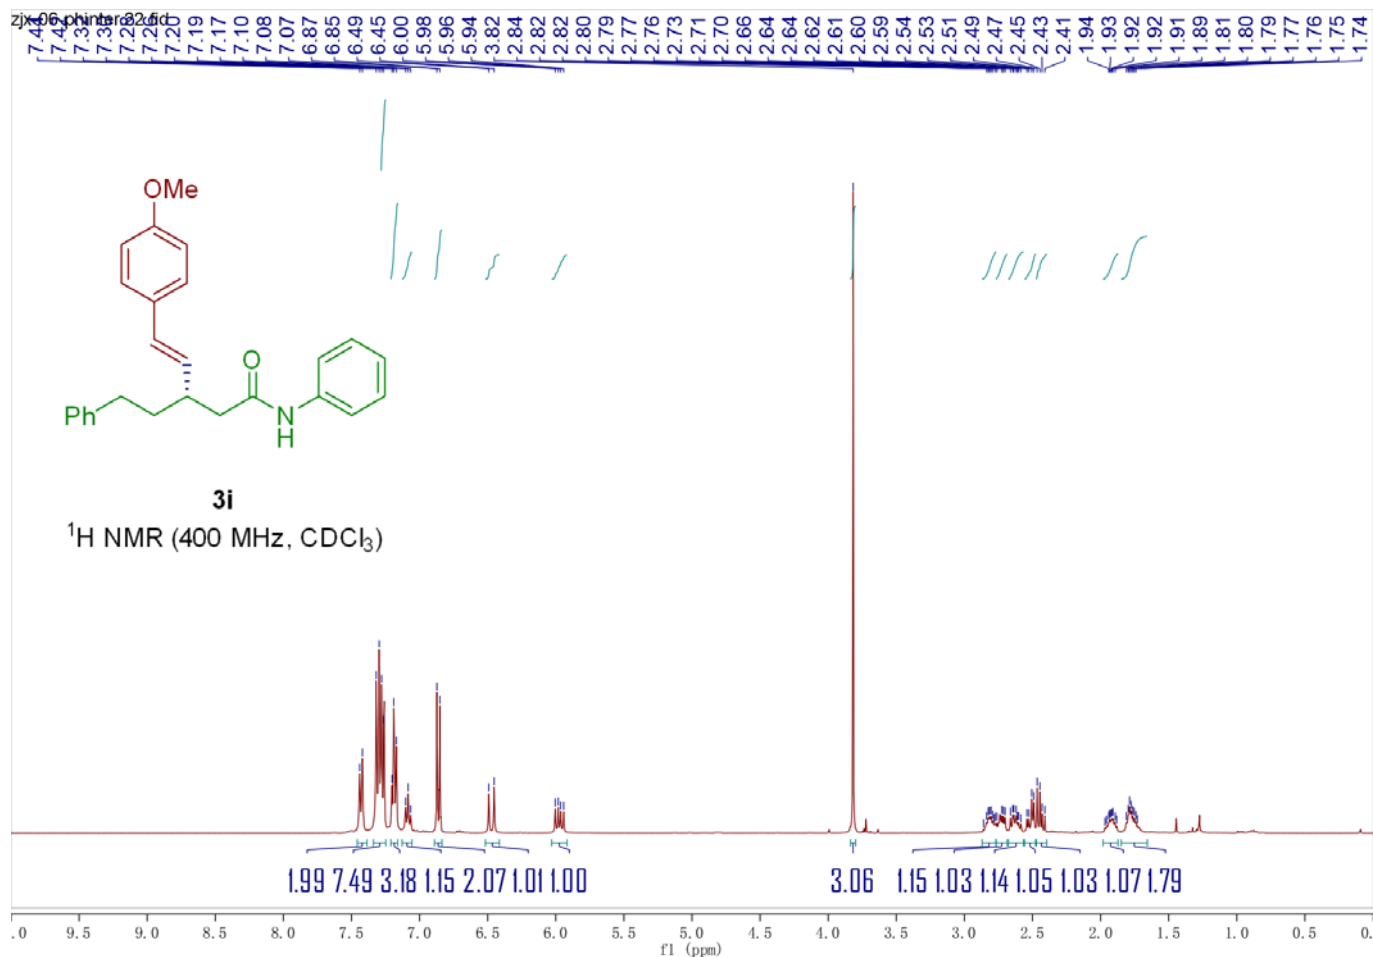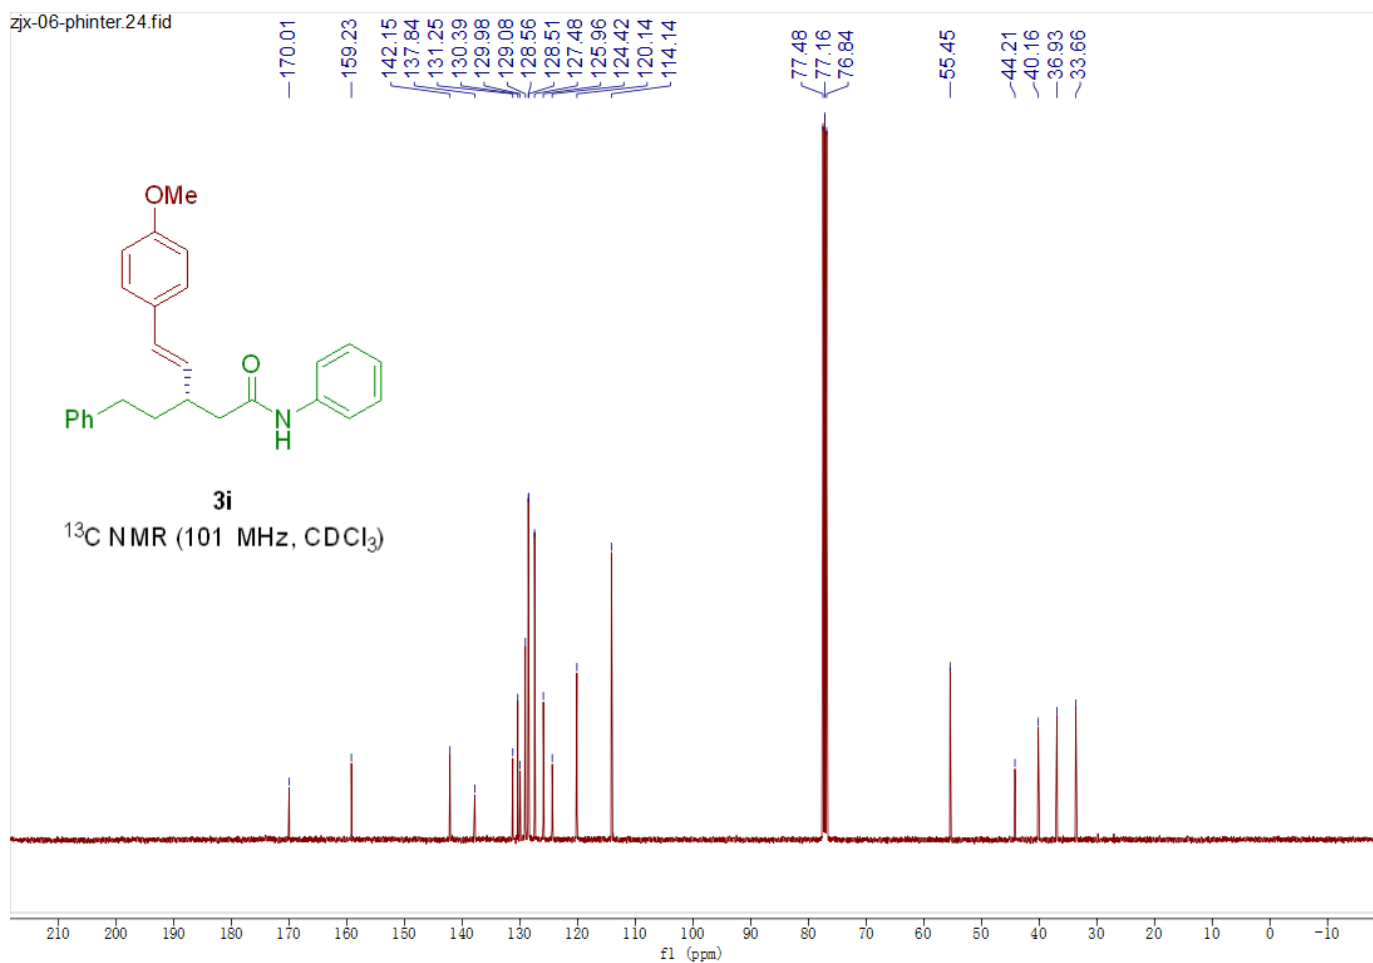

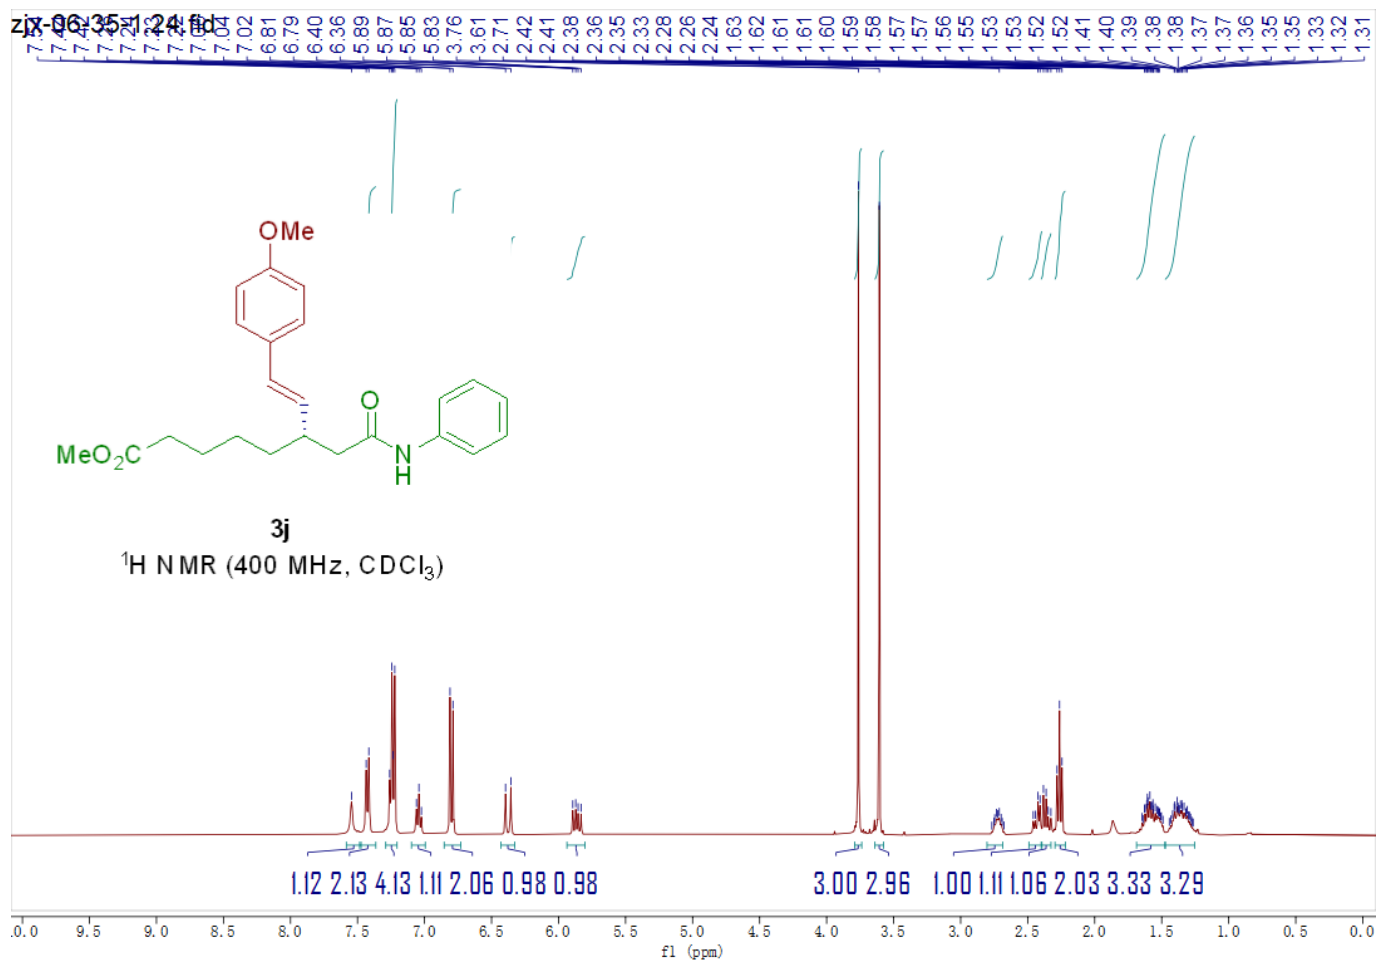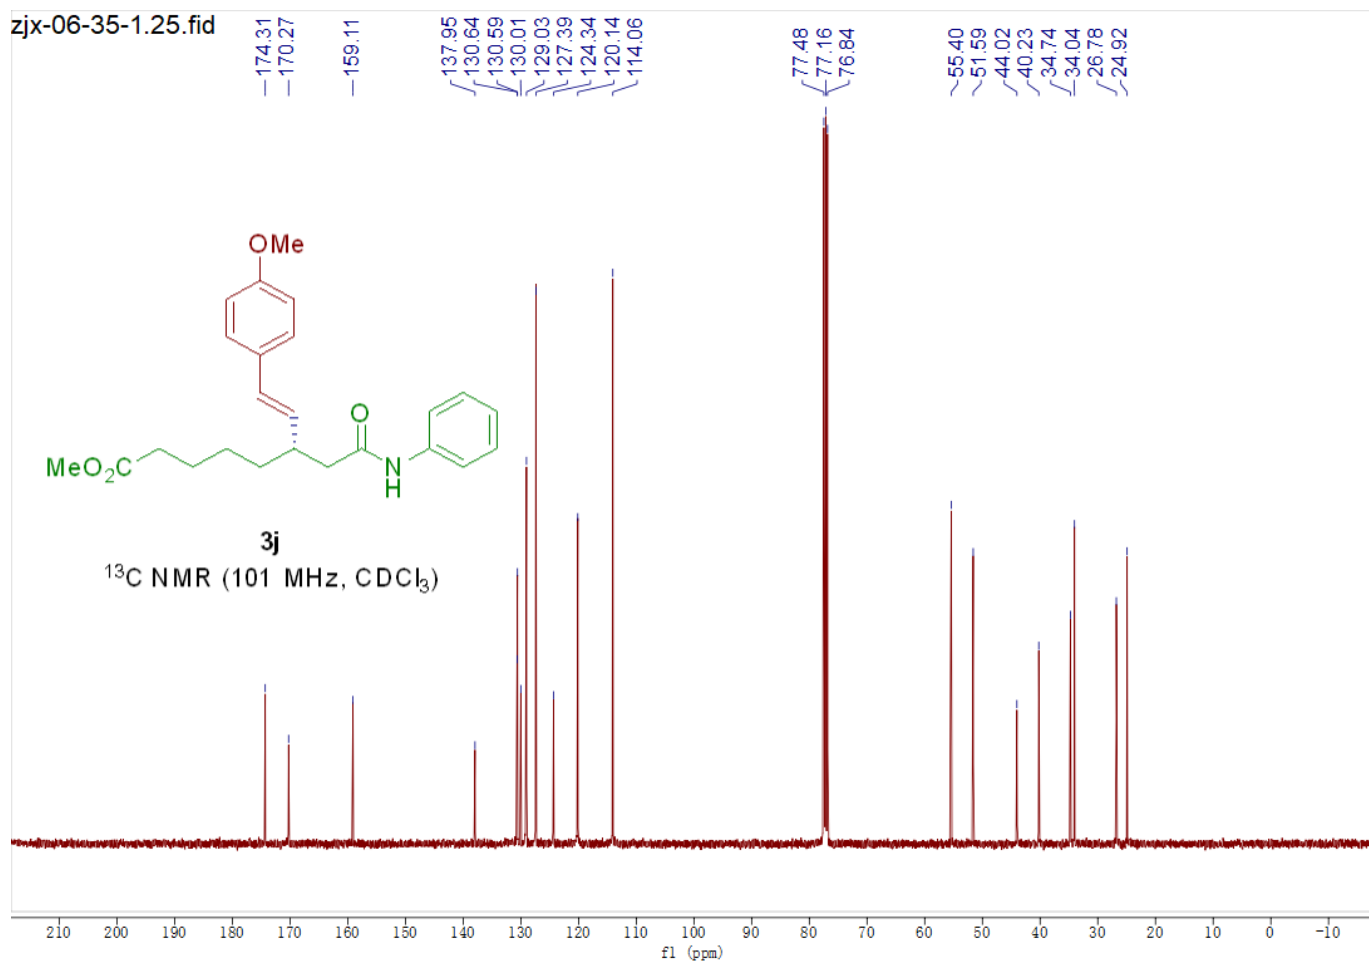



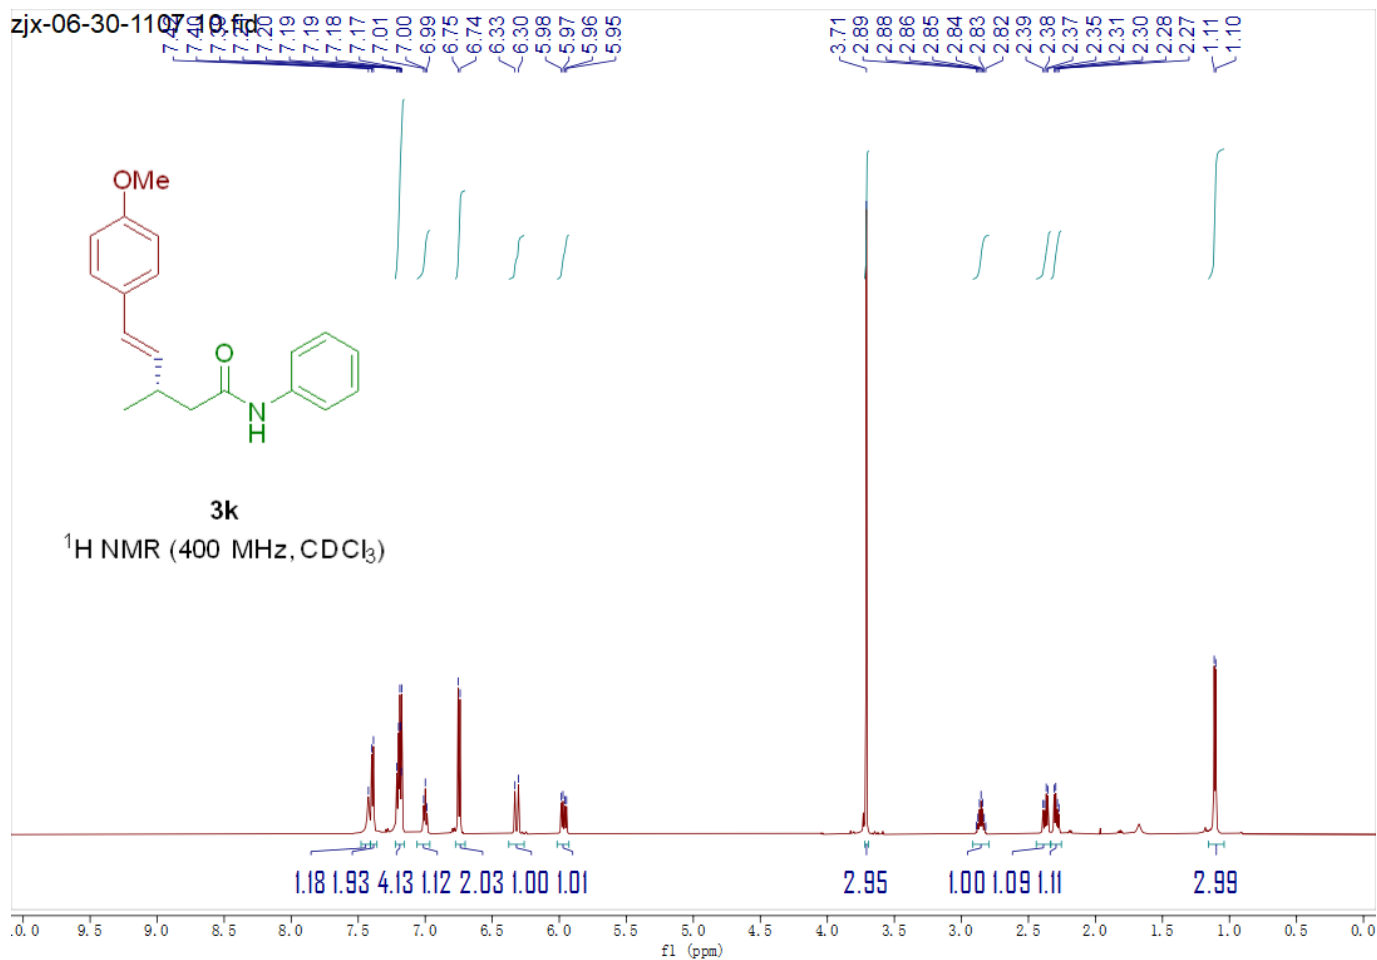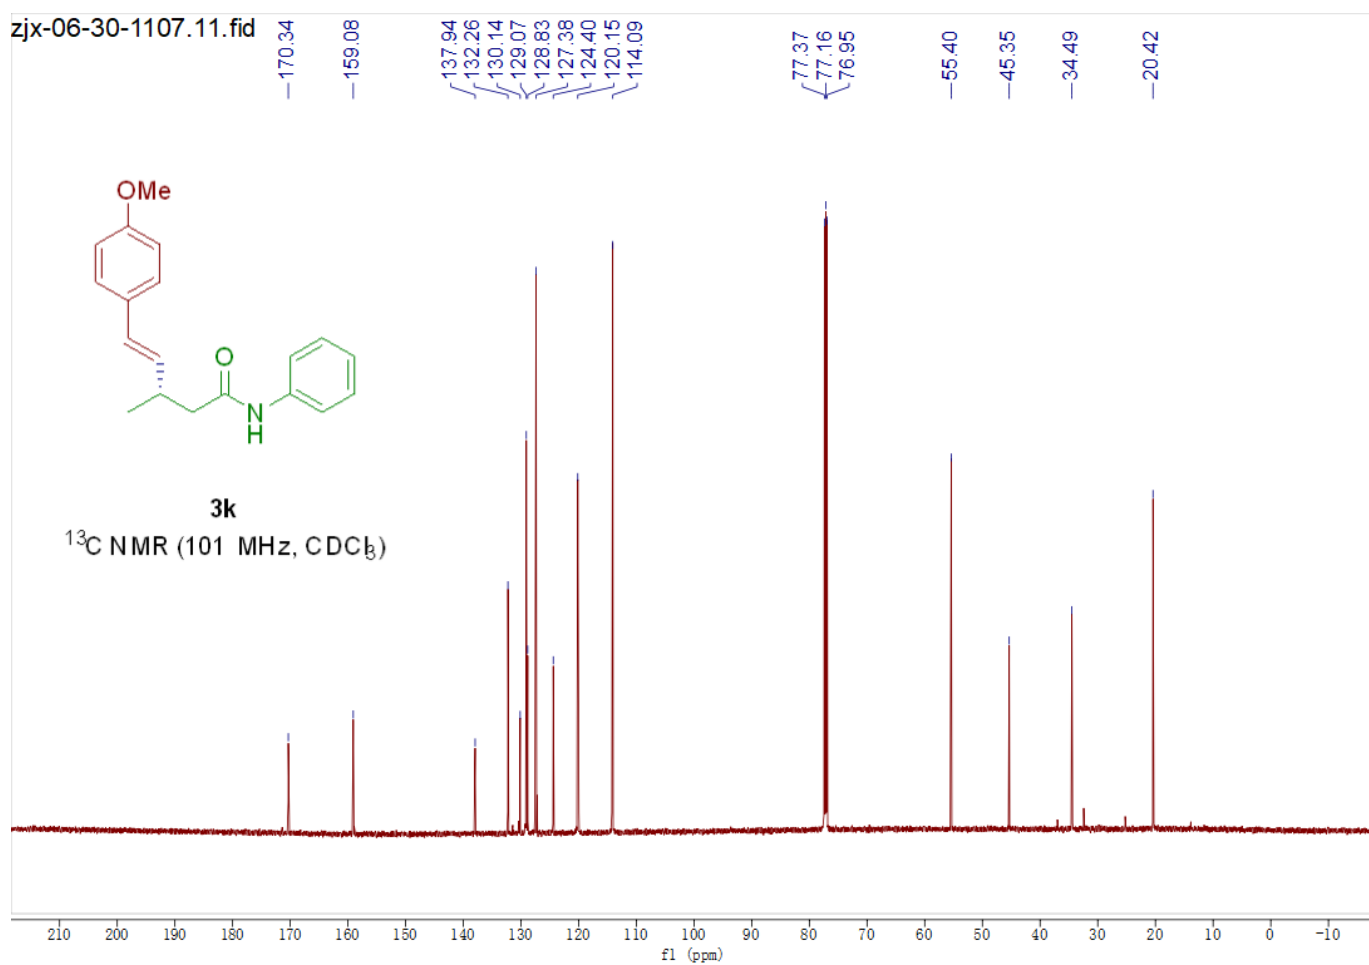

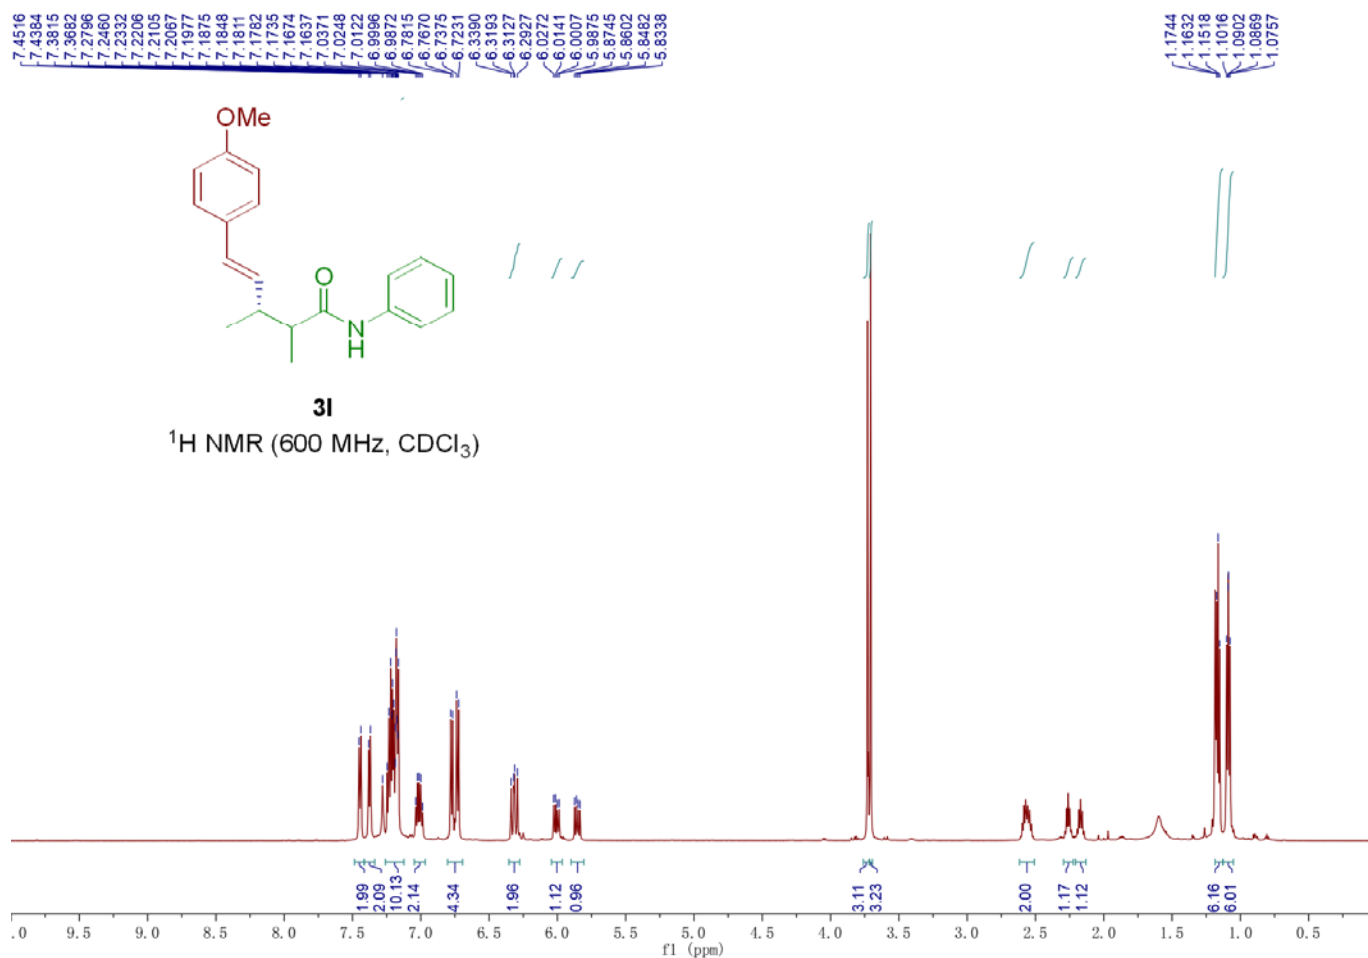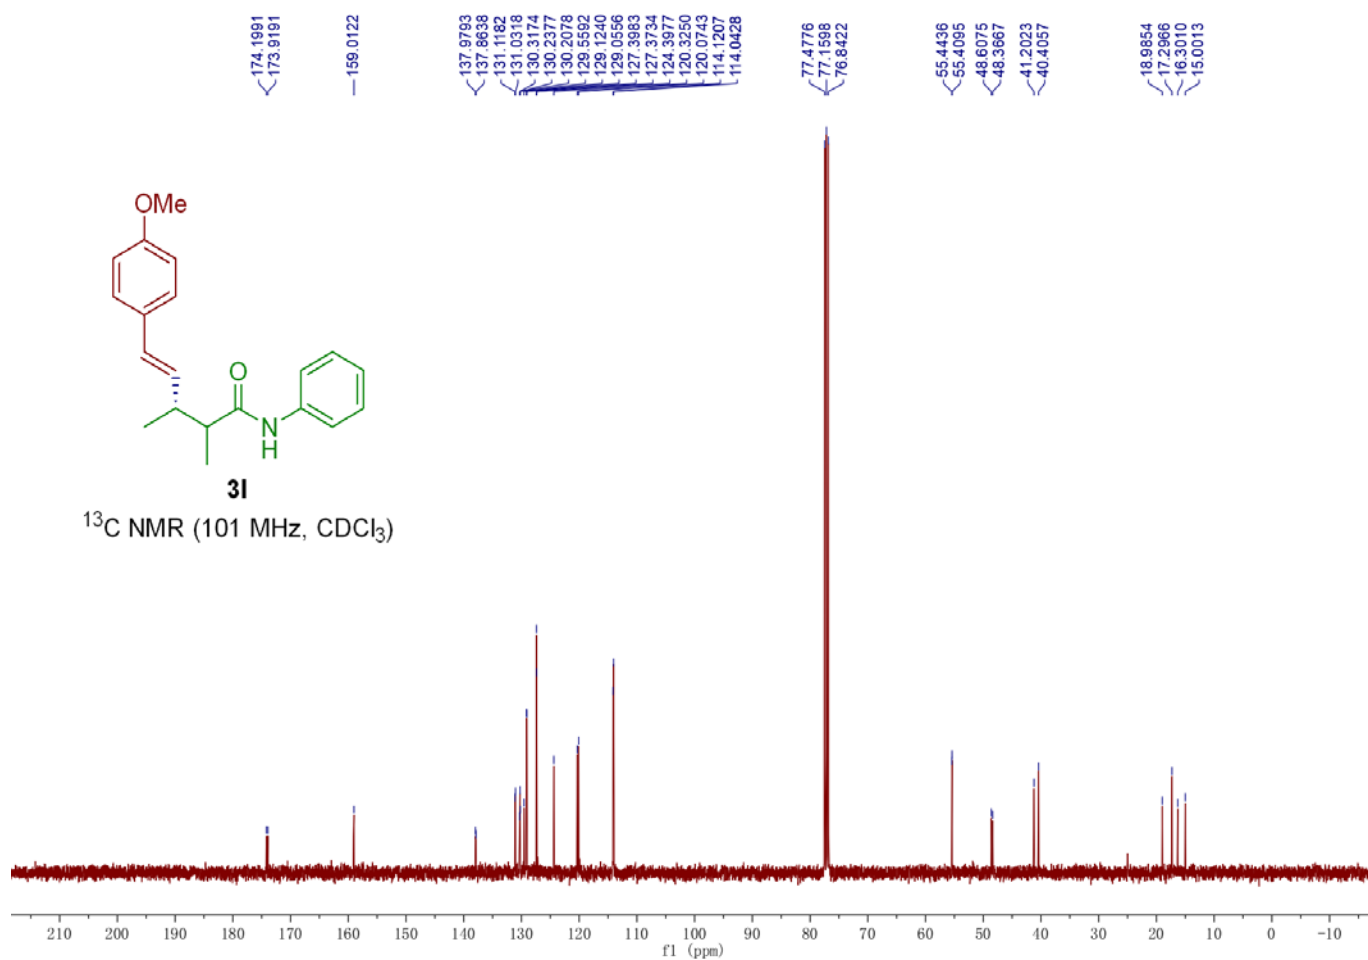

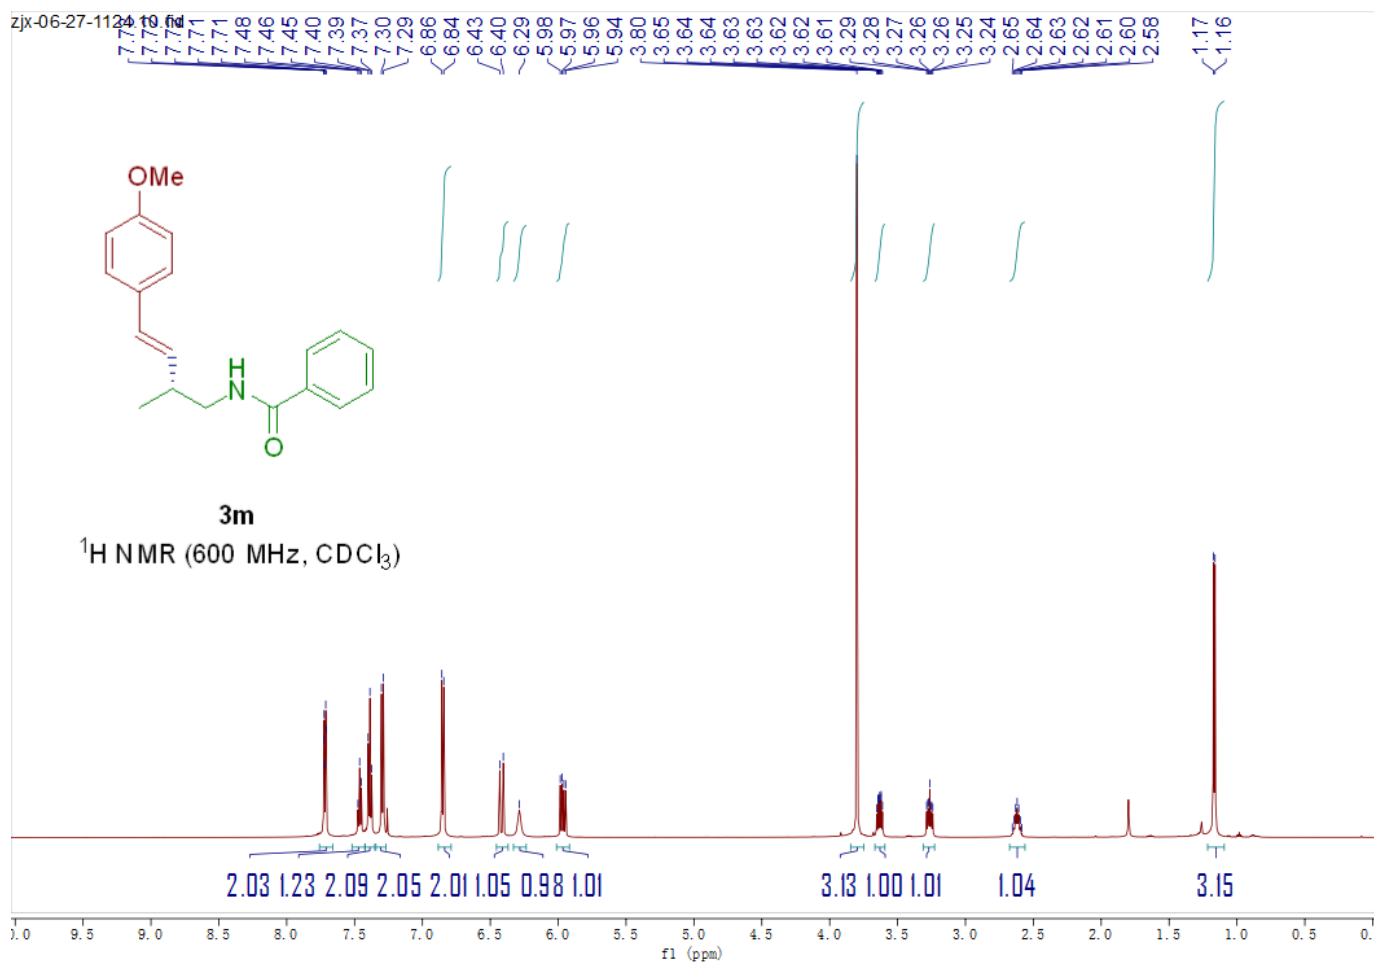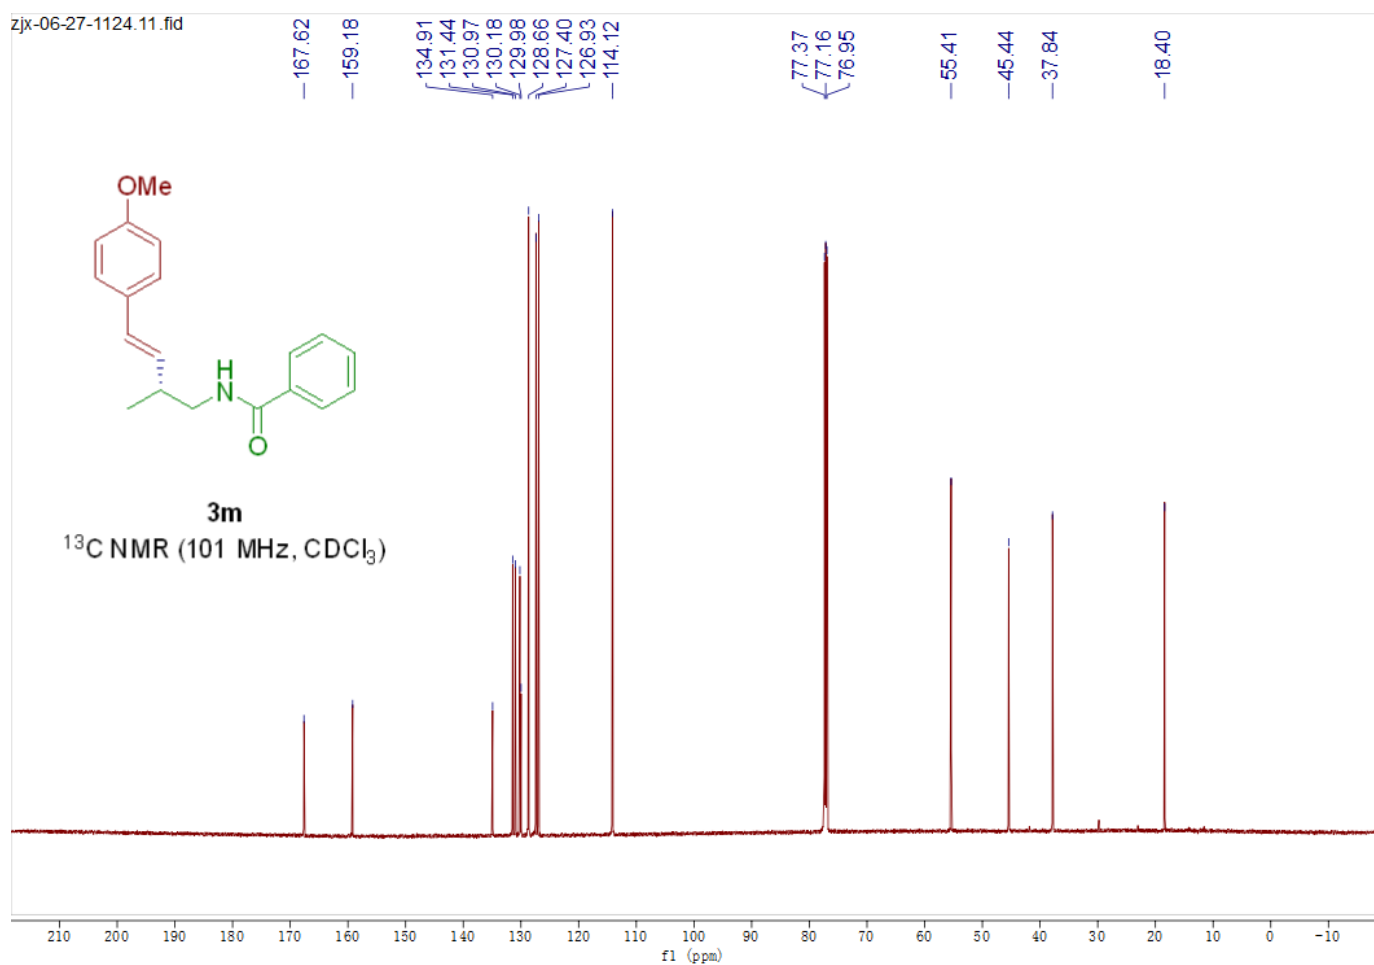

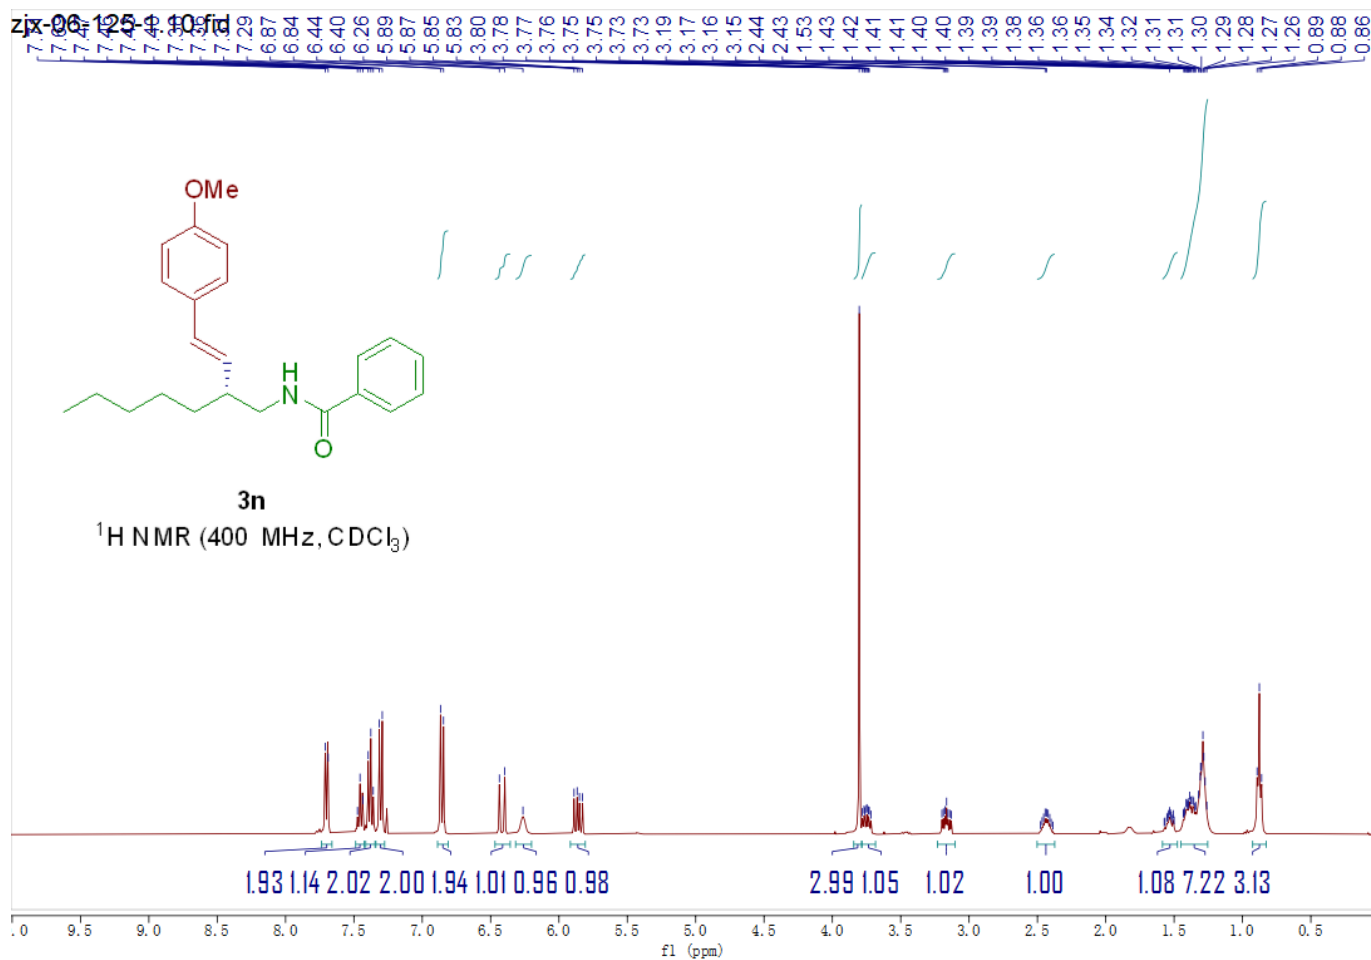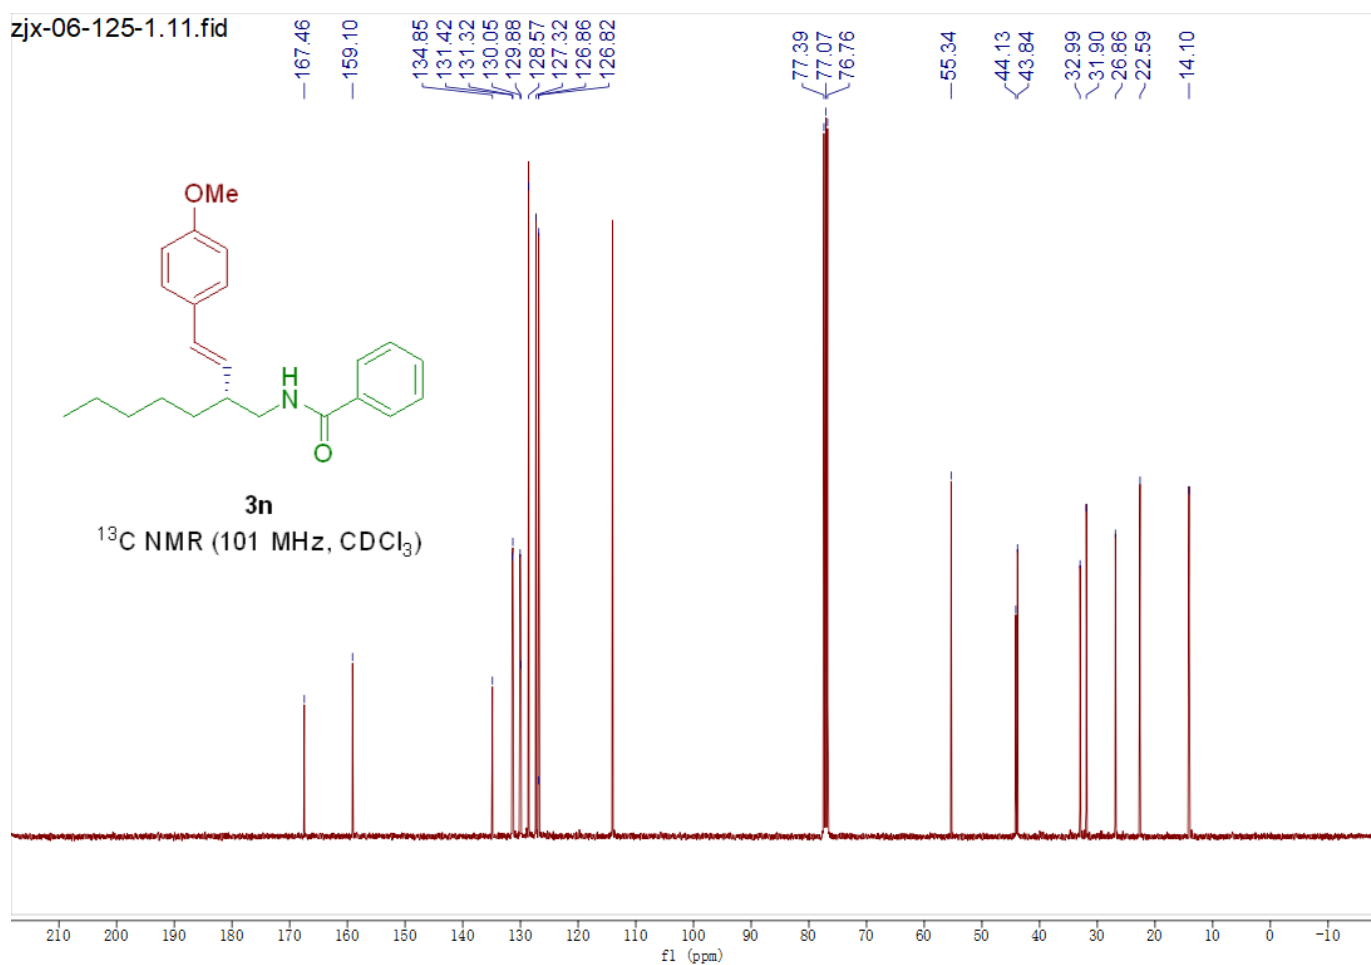

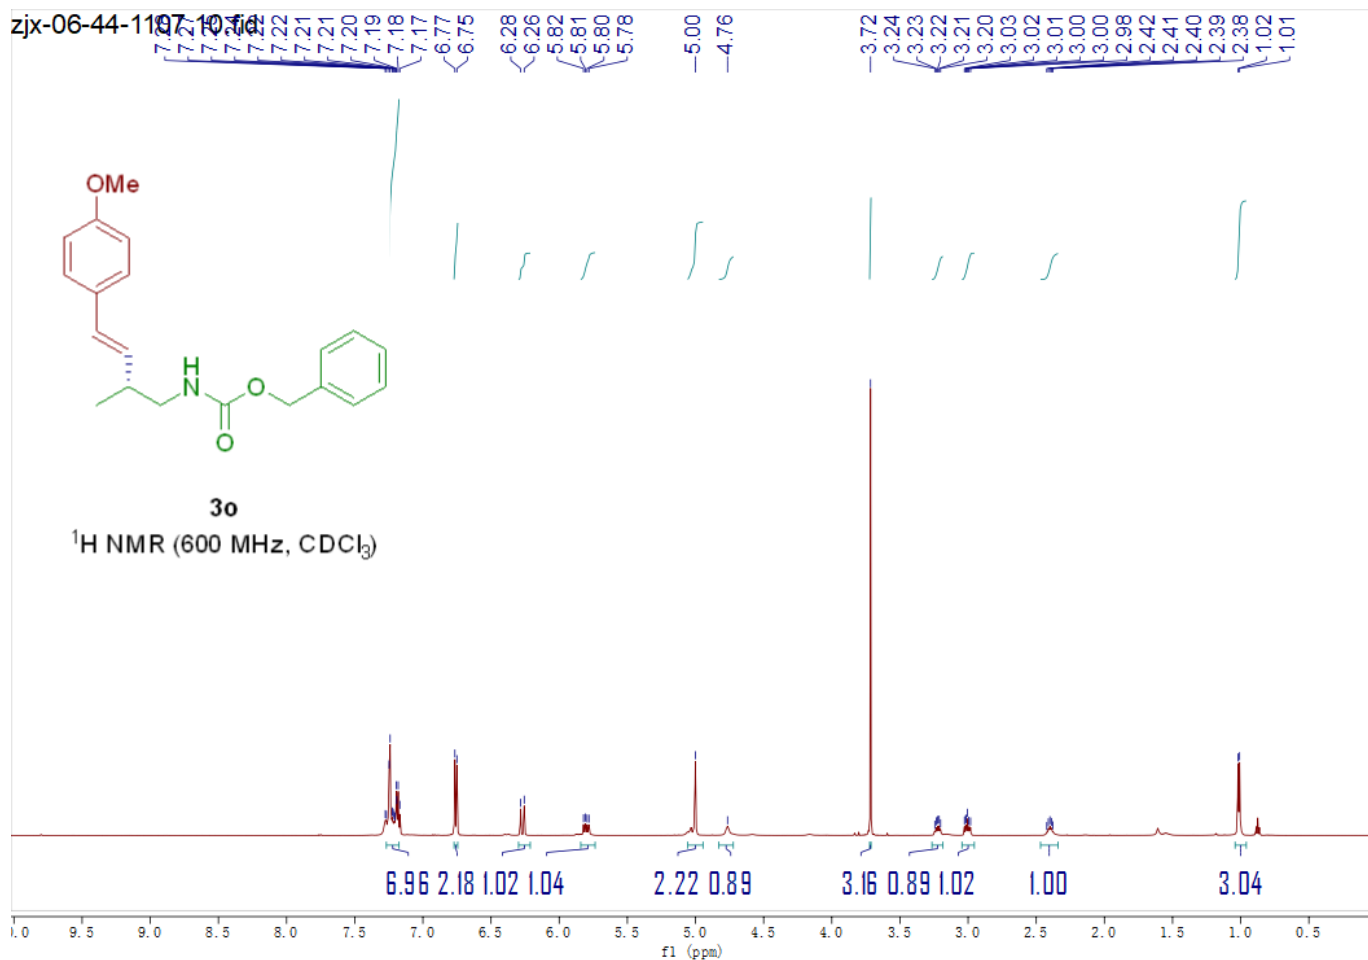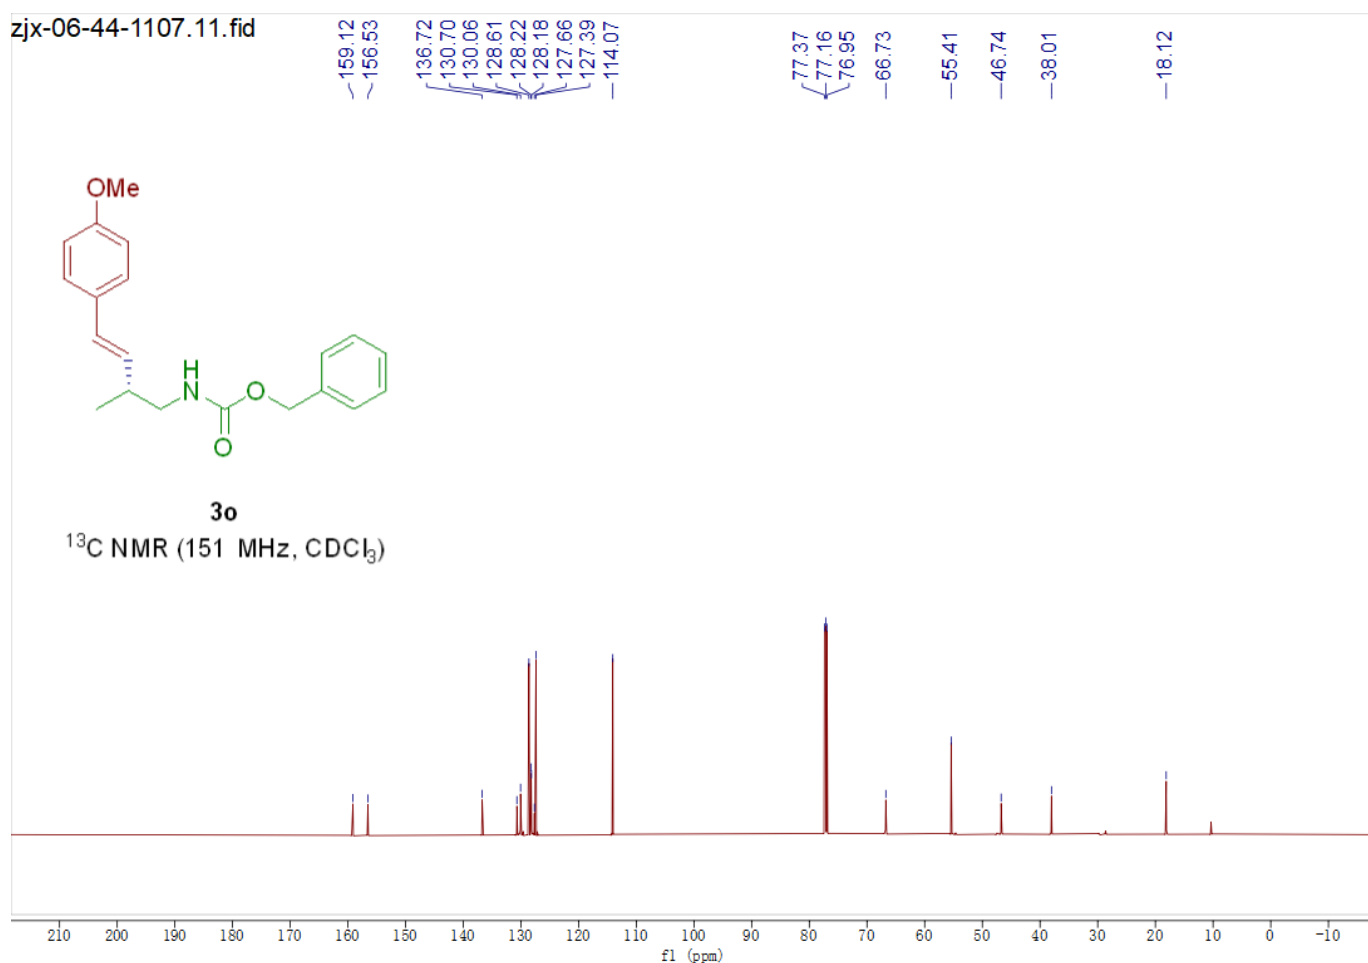

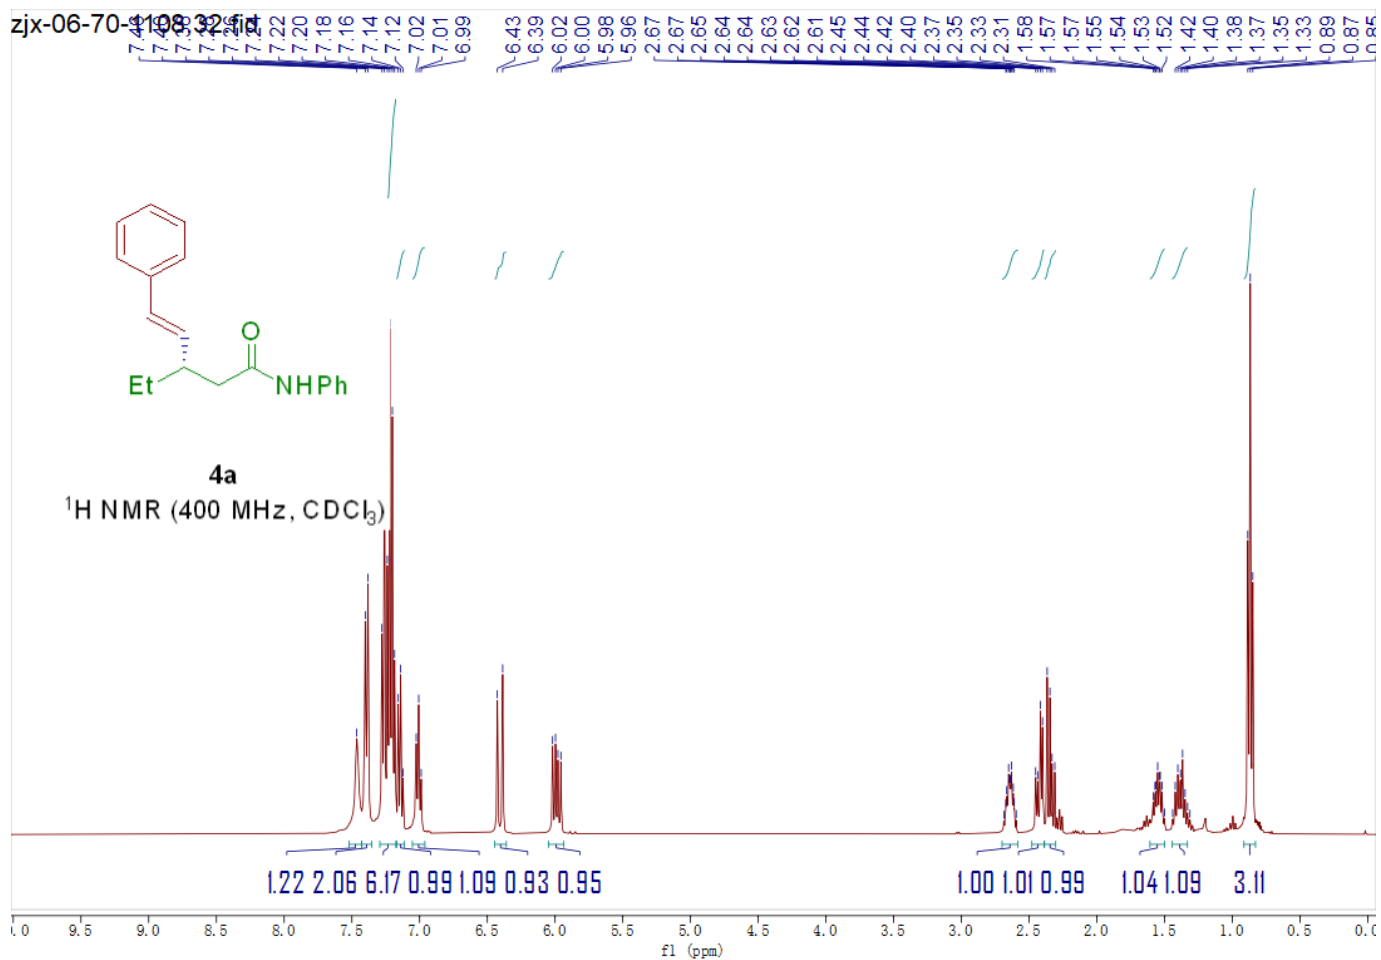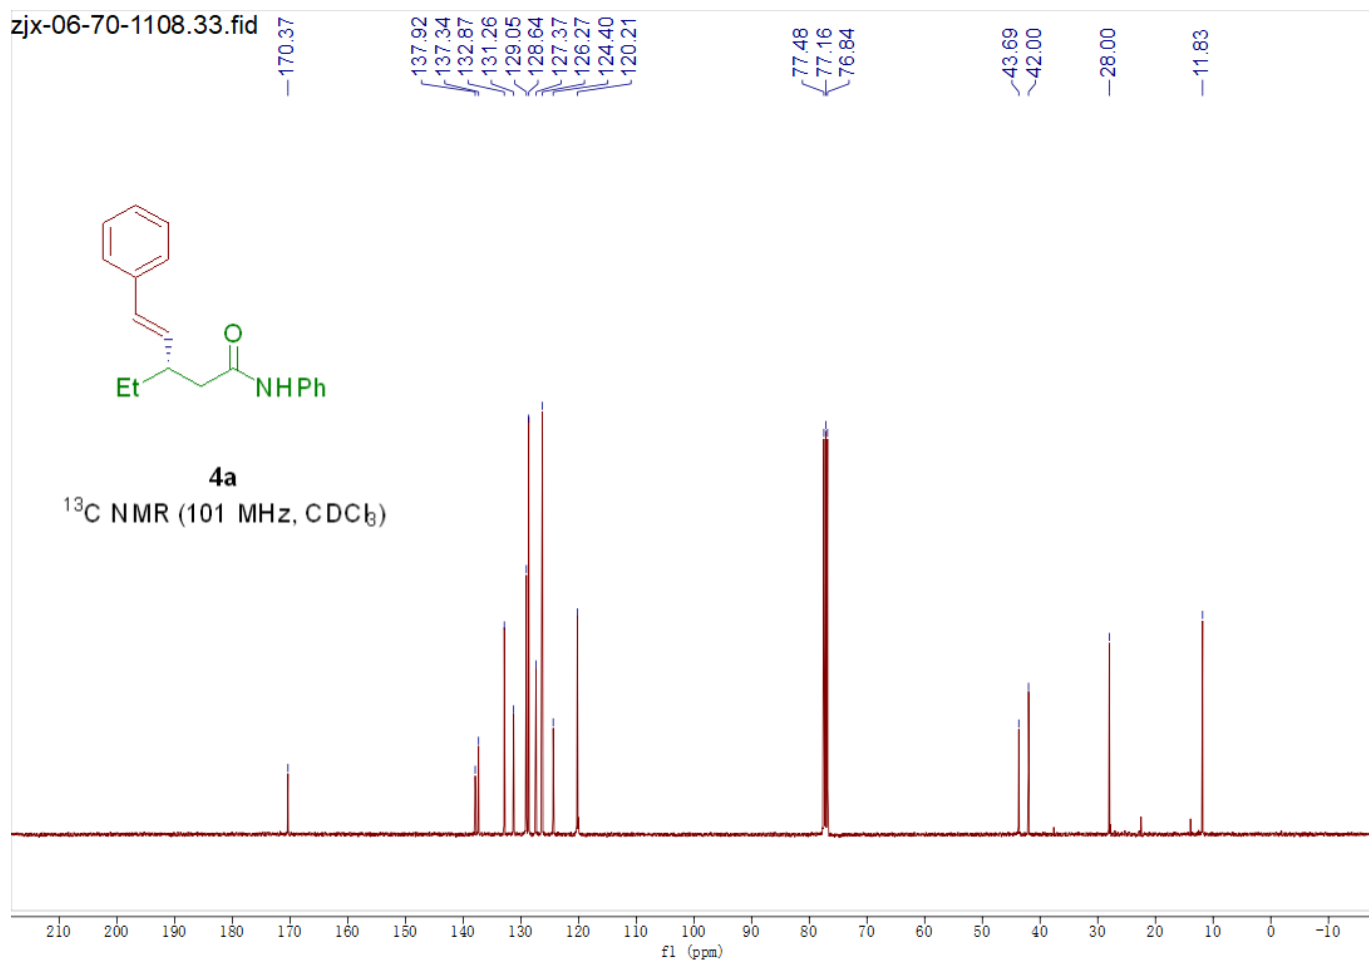

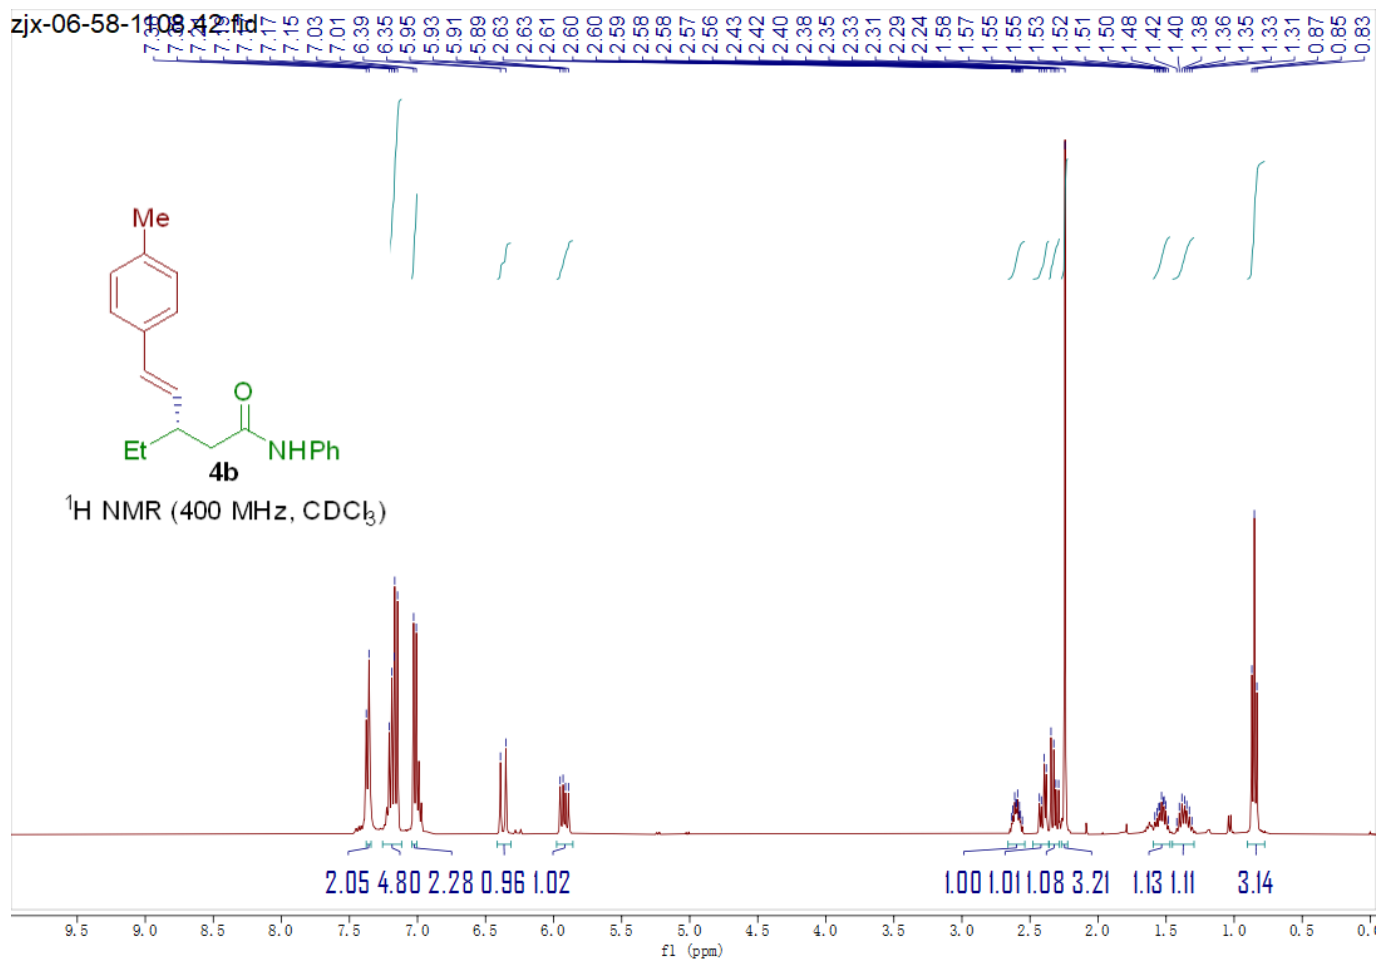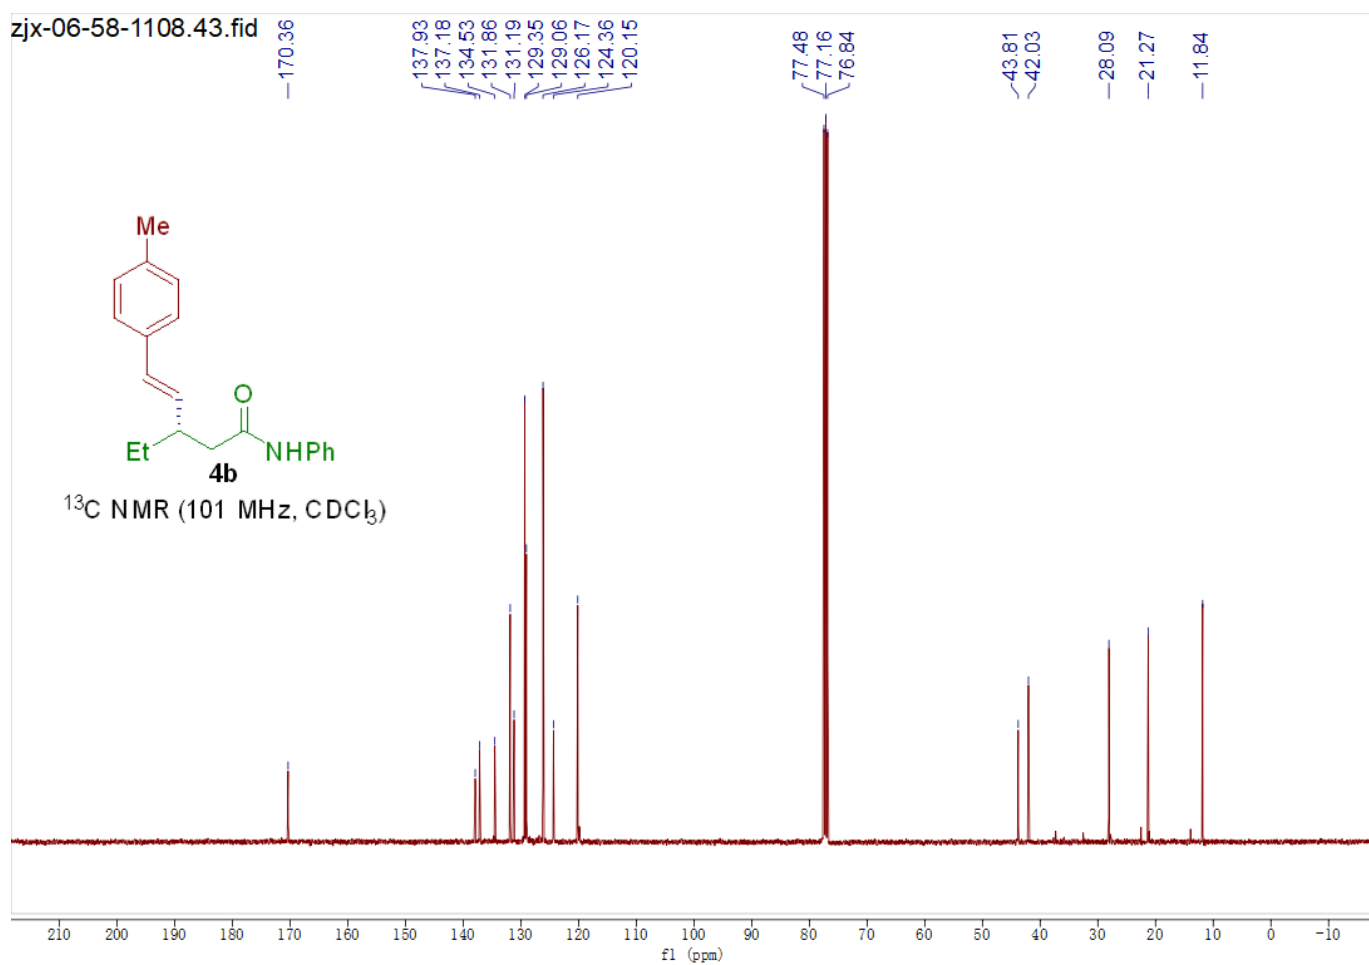

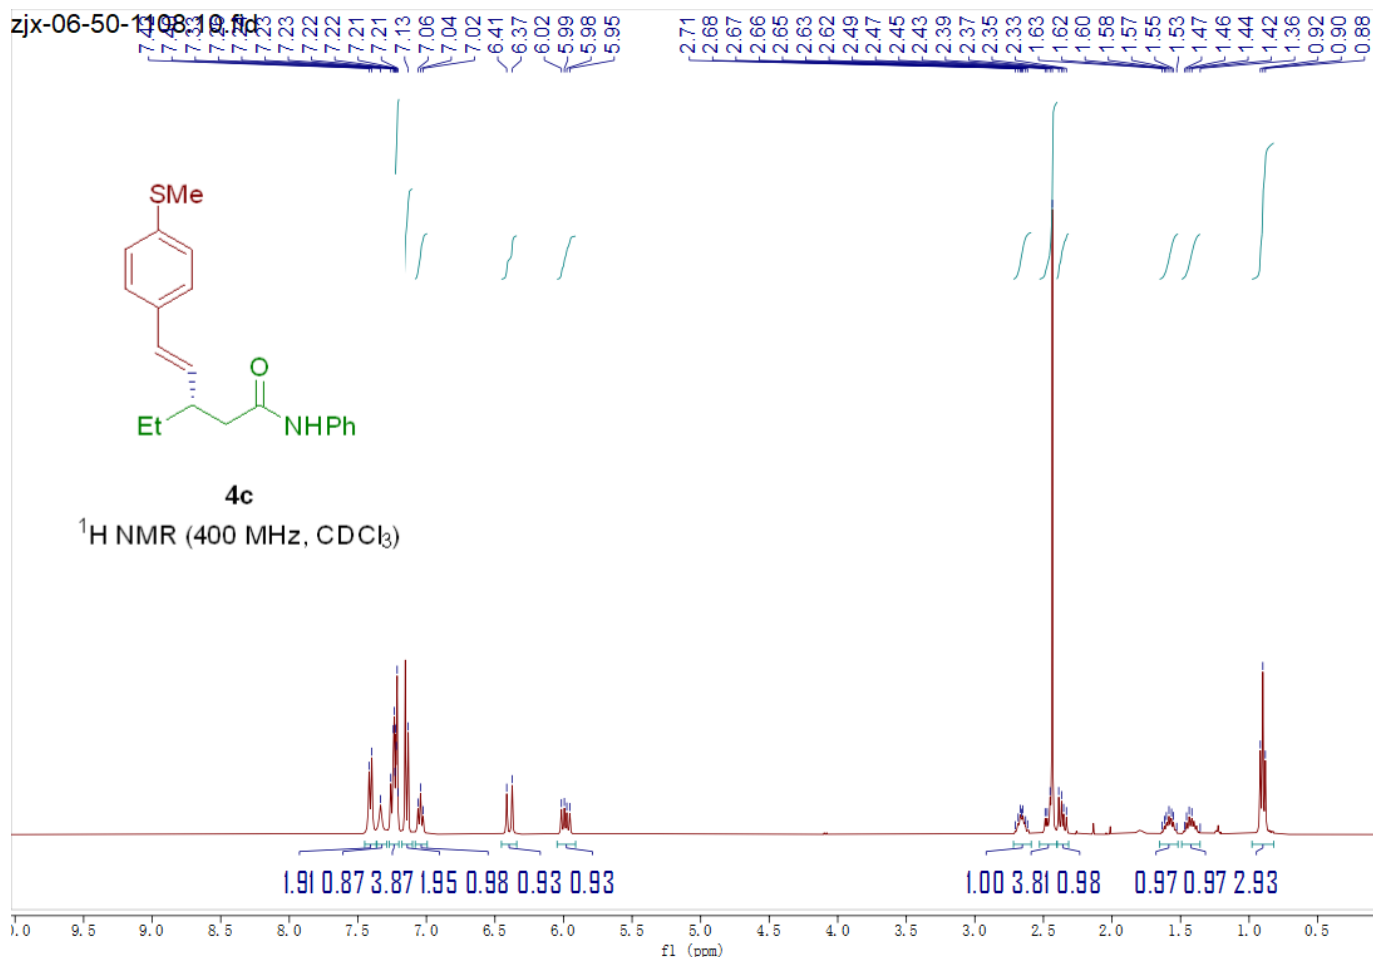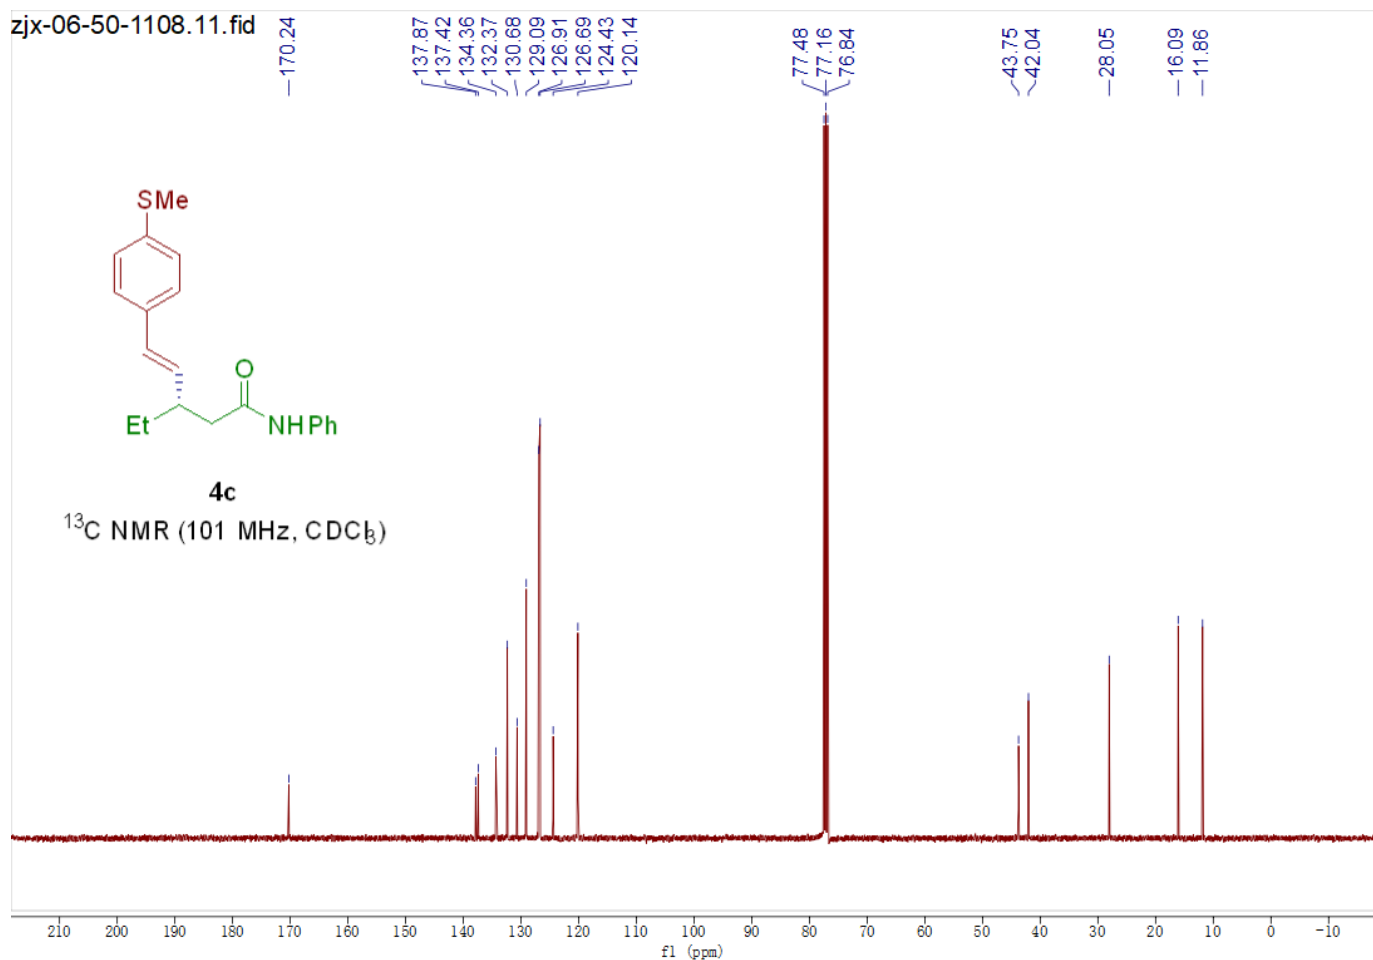



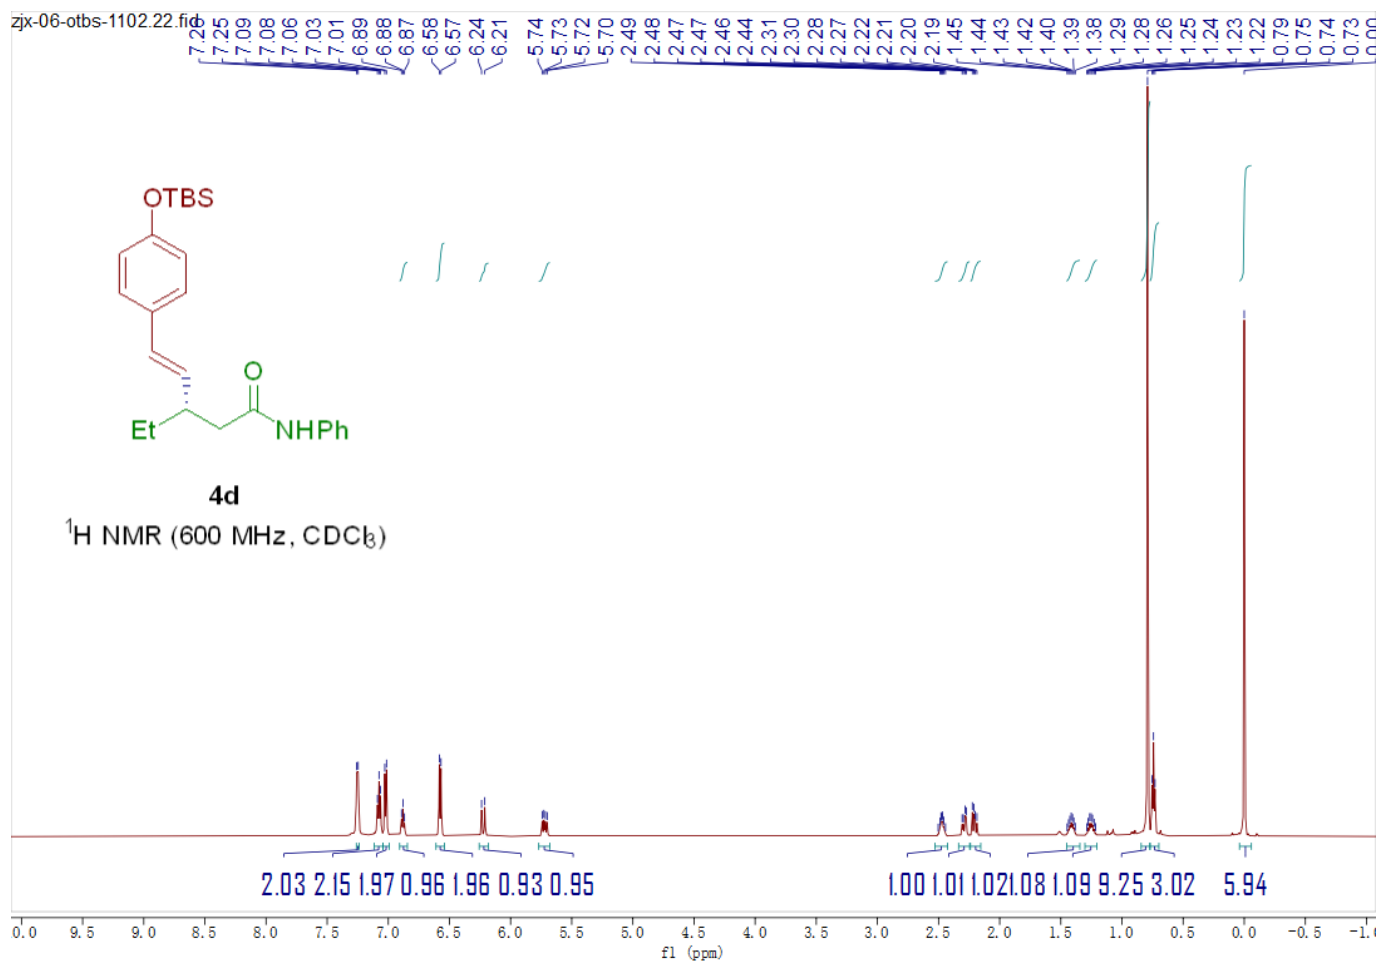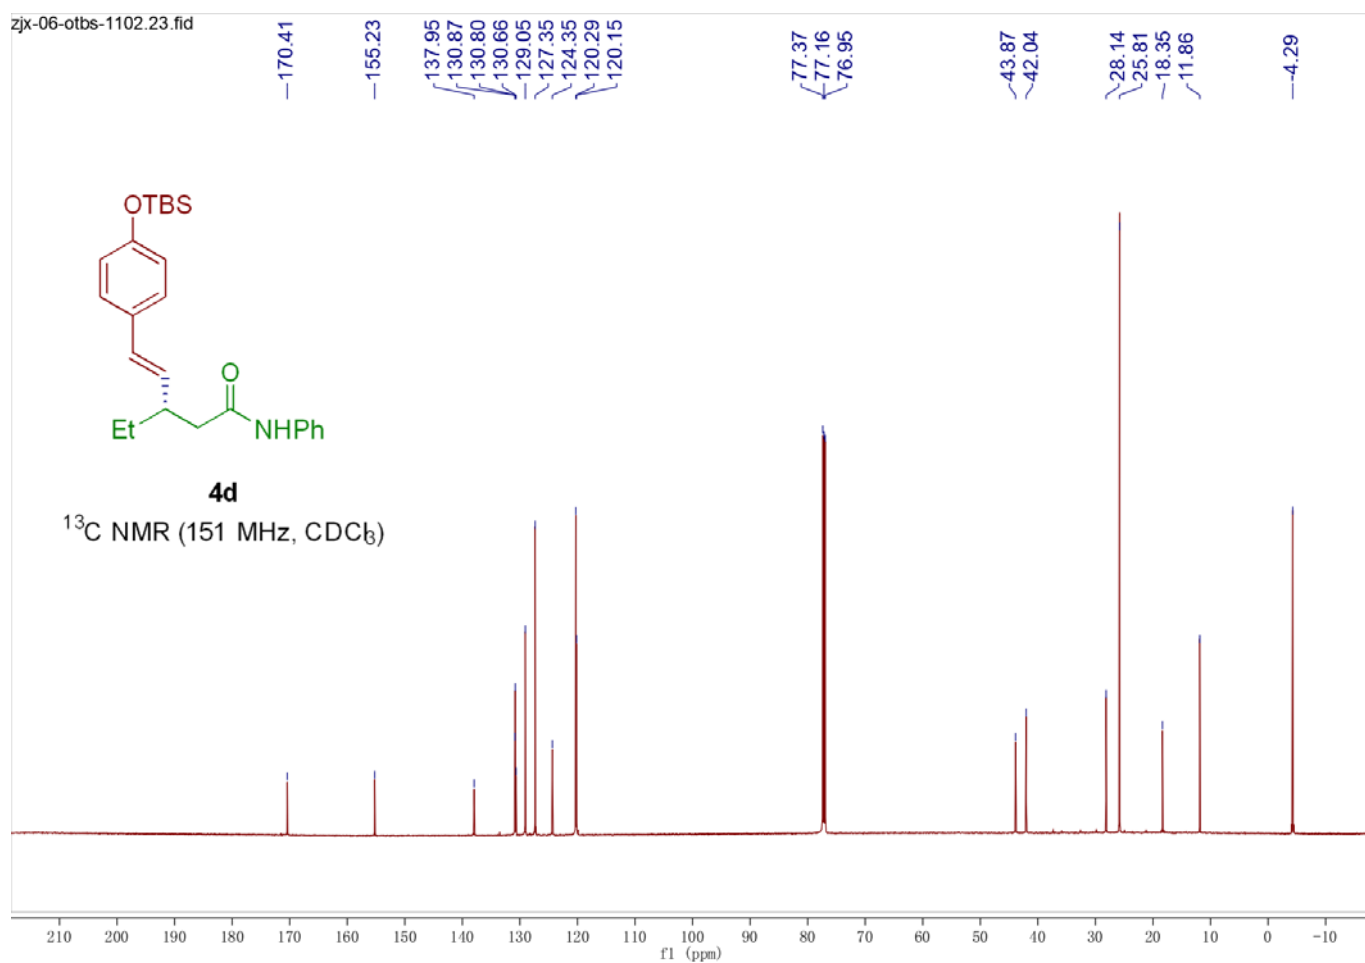

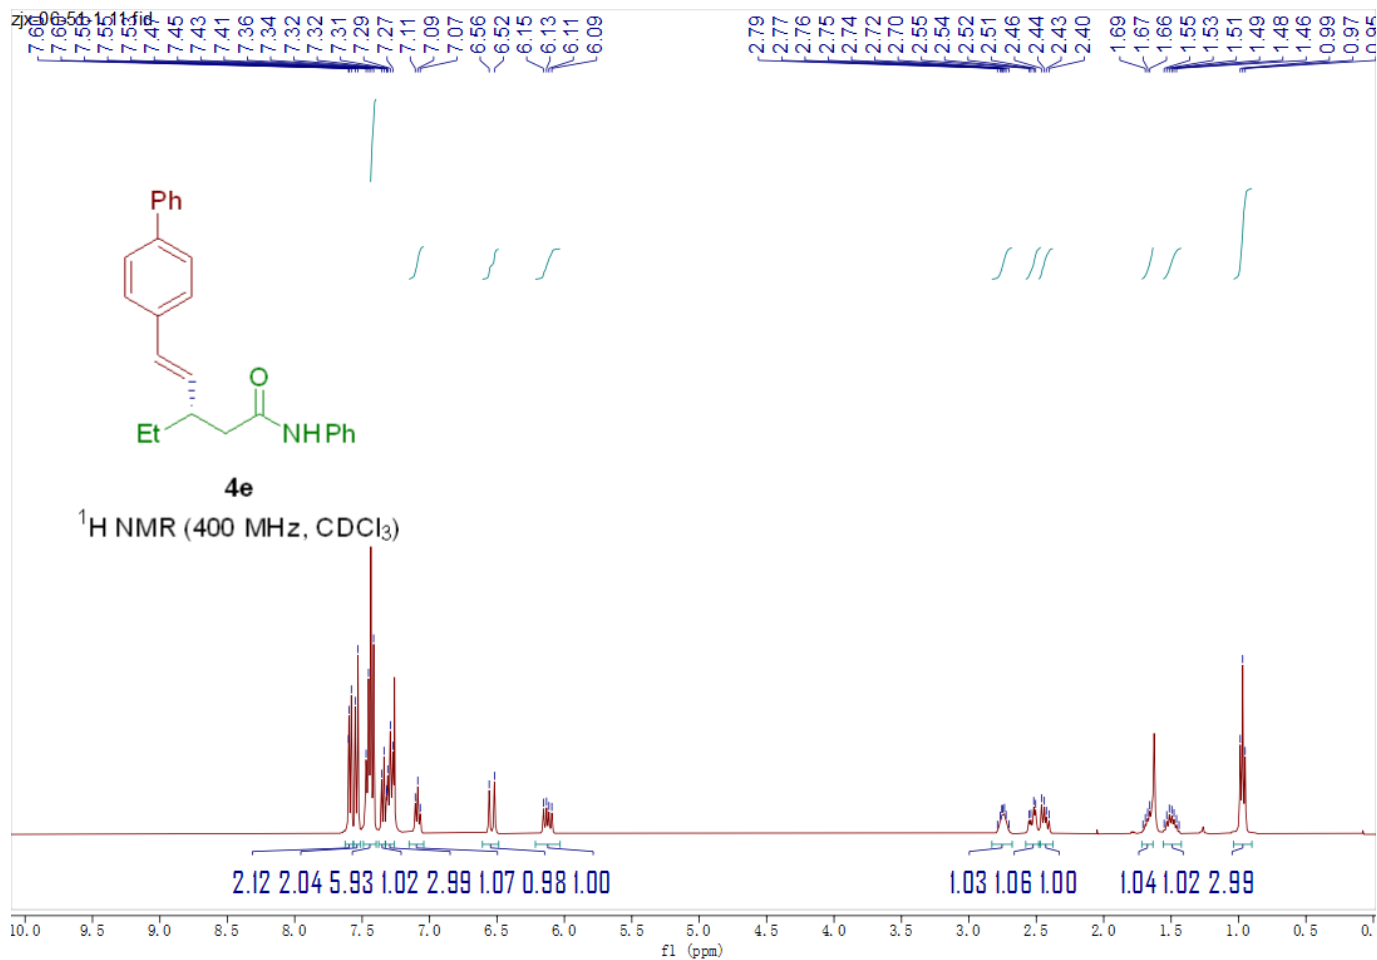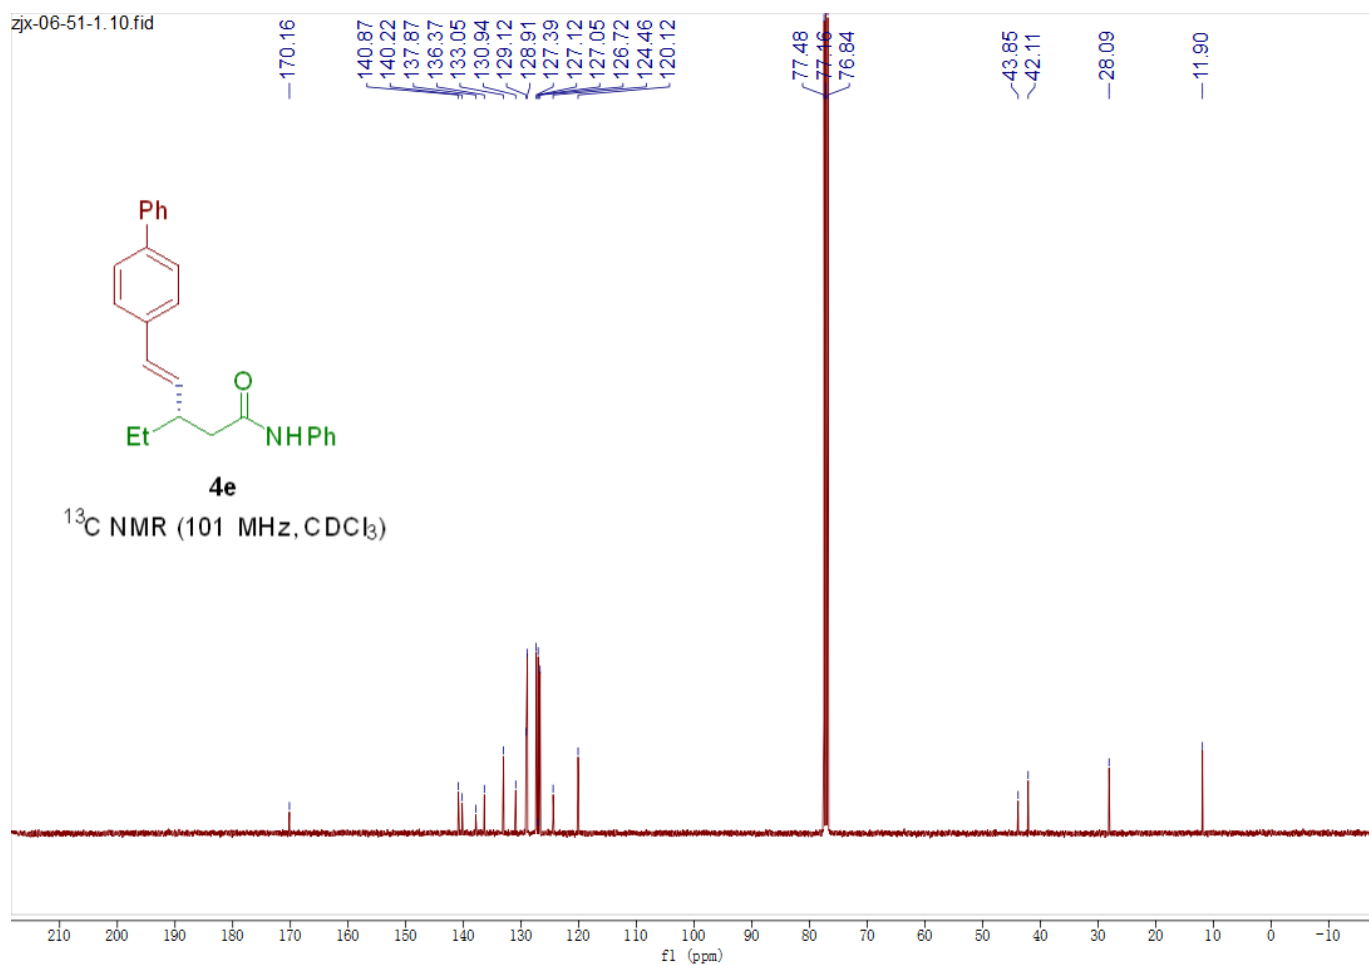

zjx-06-pcl.10.fid

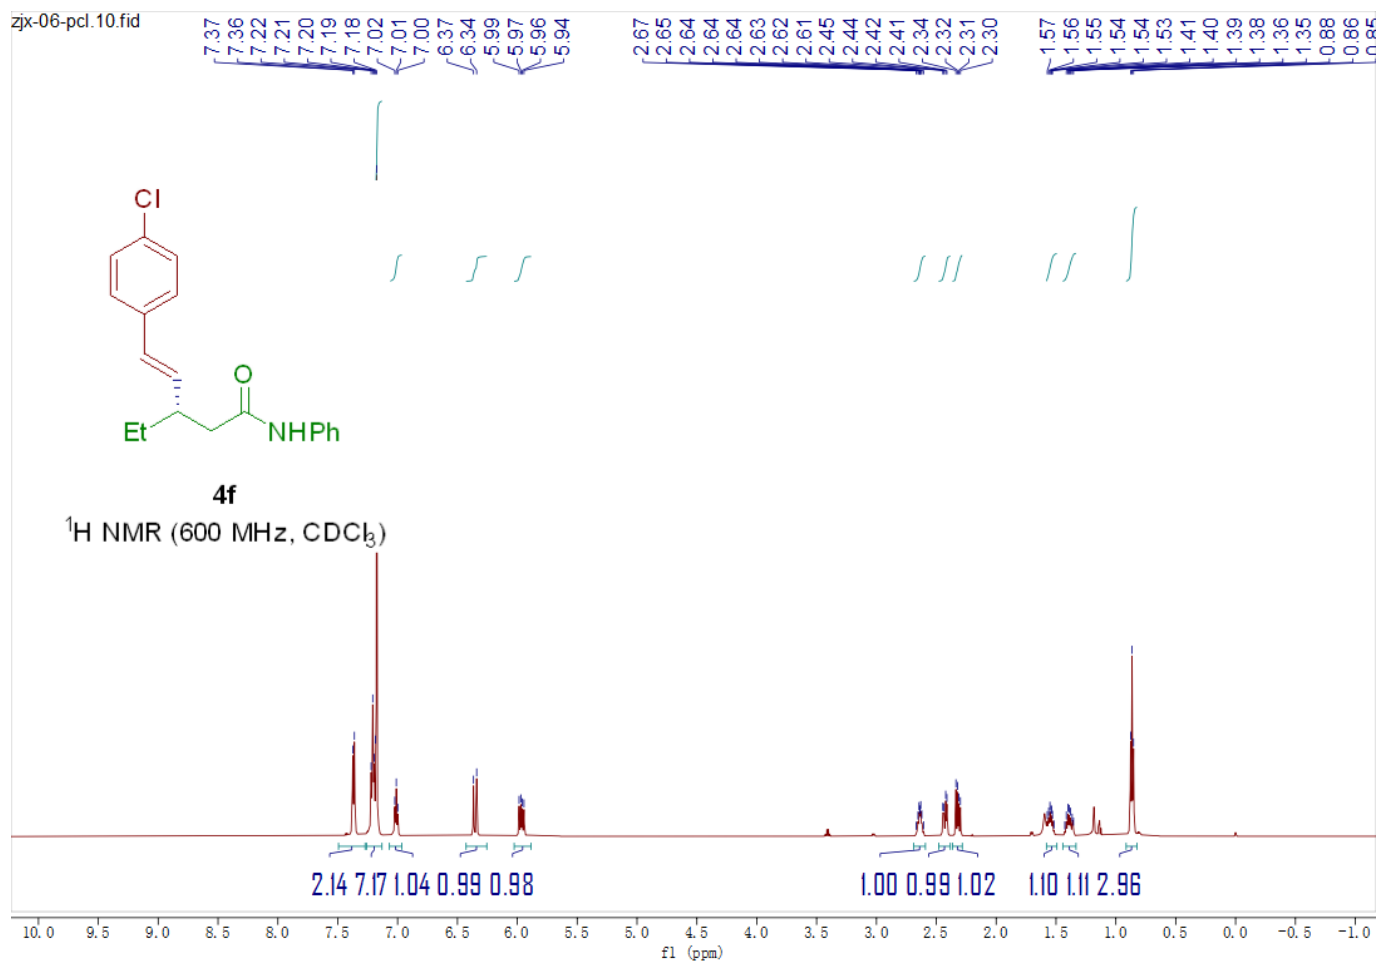

zjx-06-pcl.11.fid

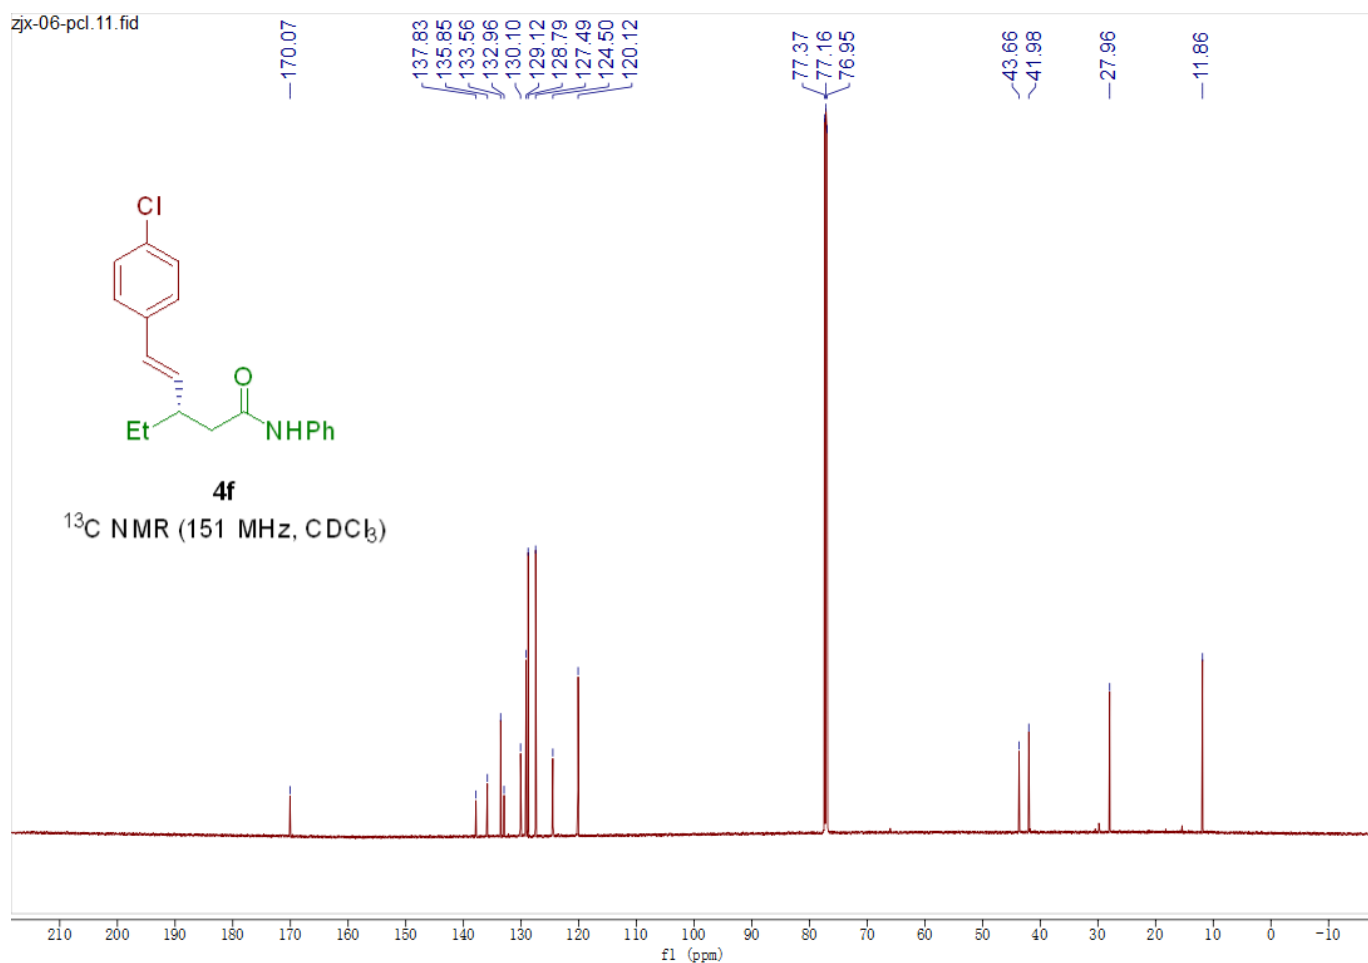

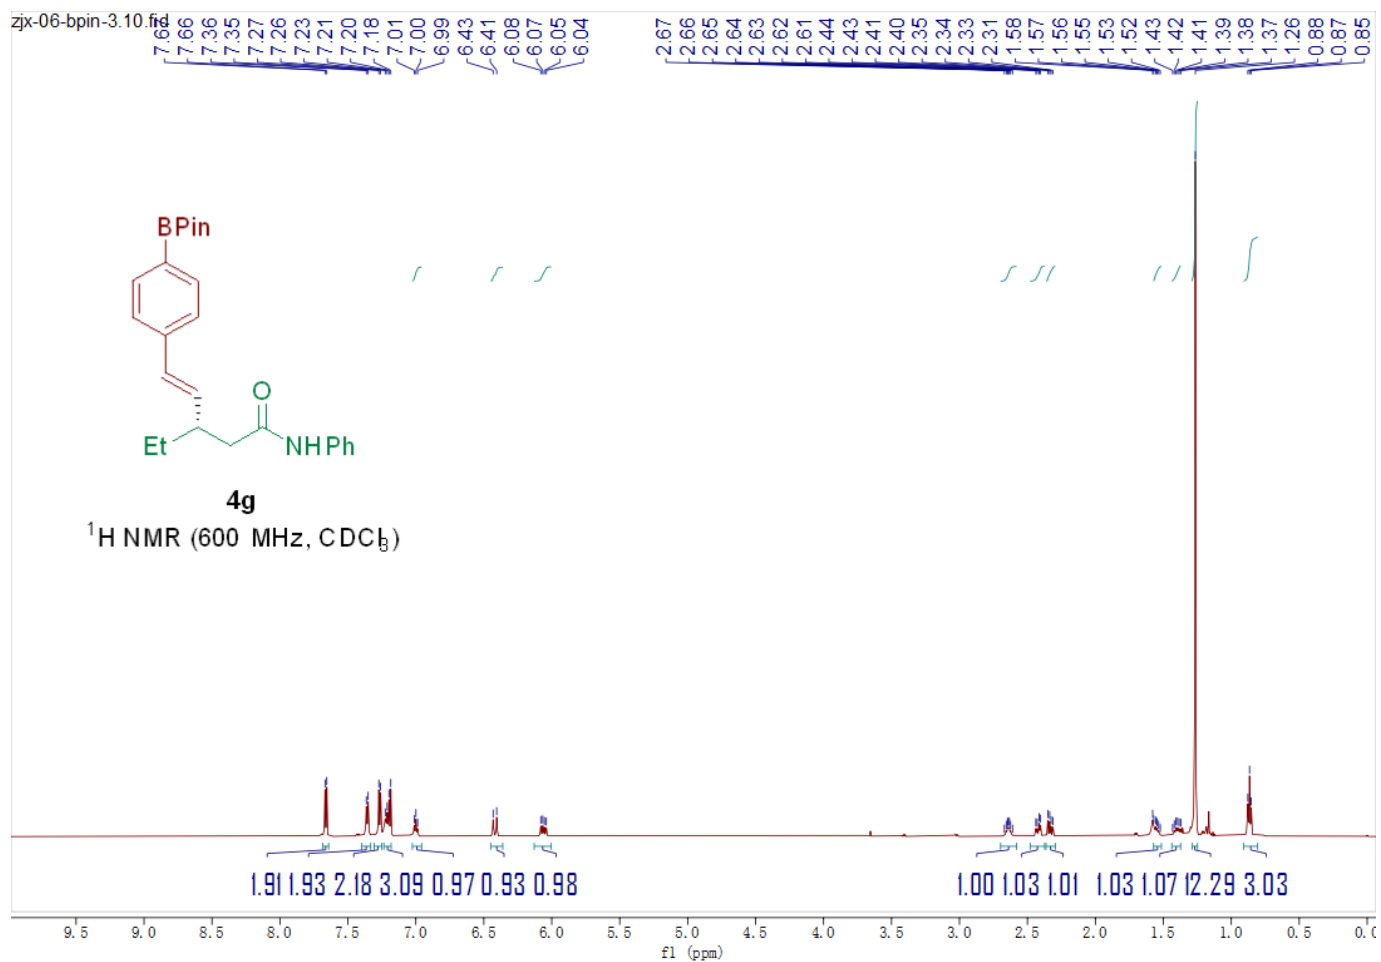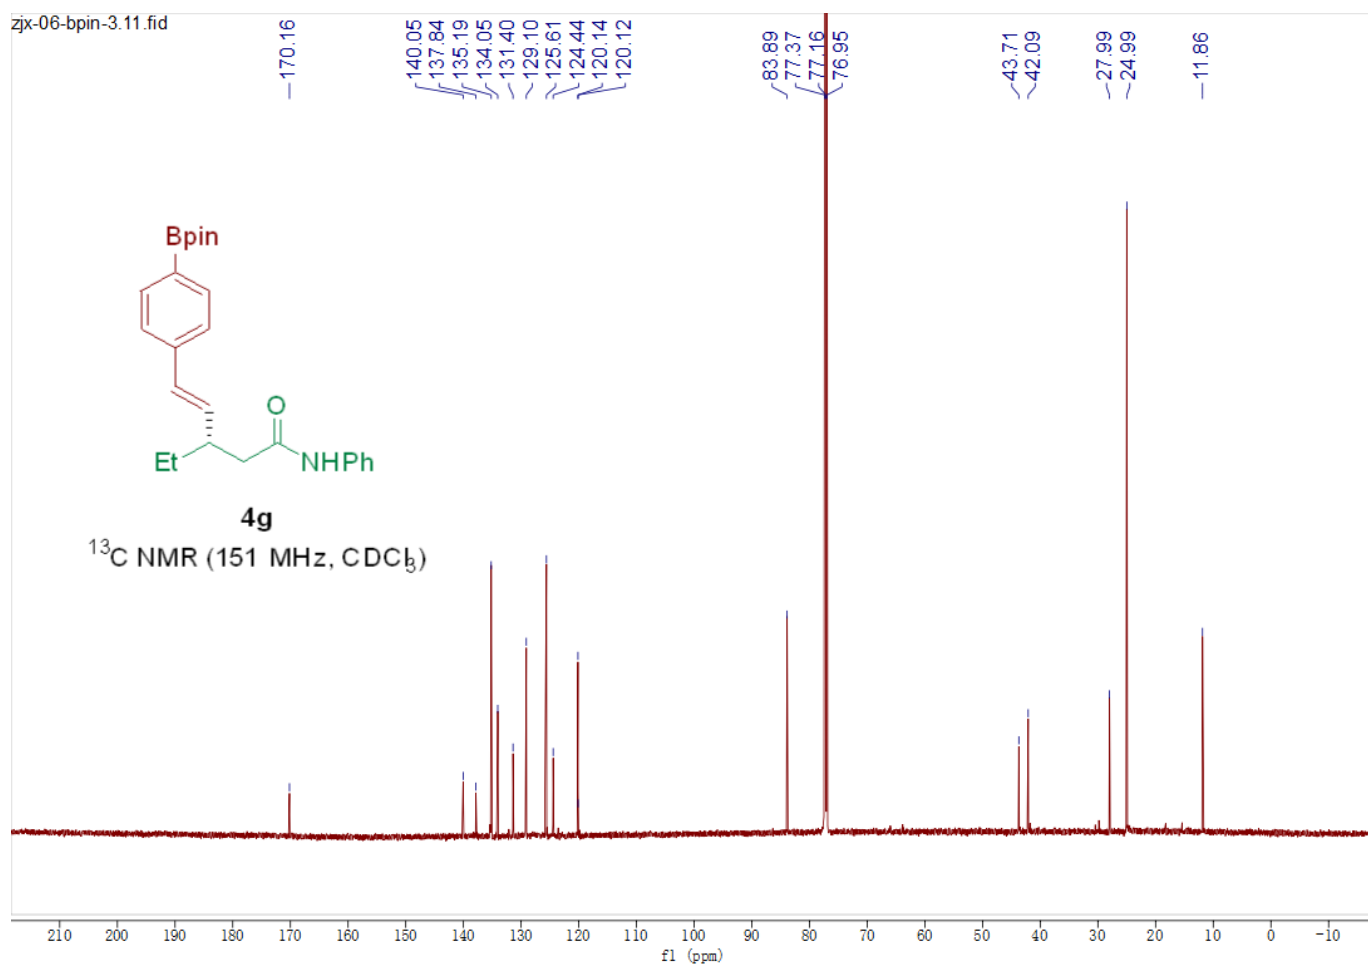

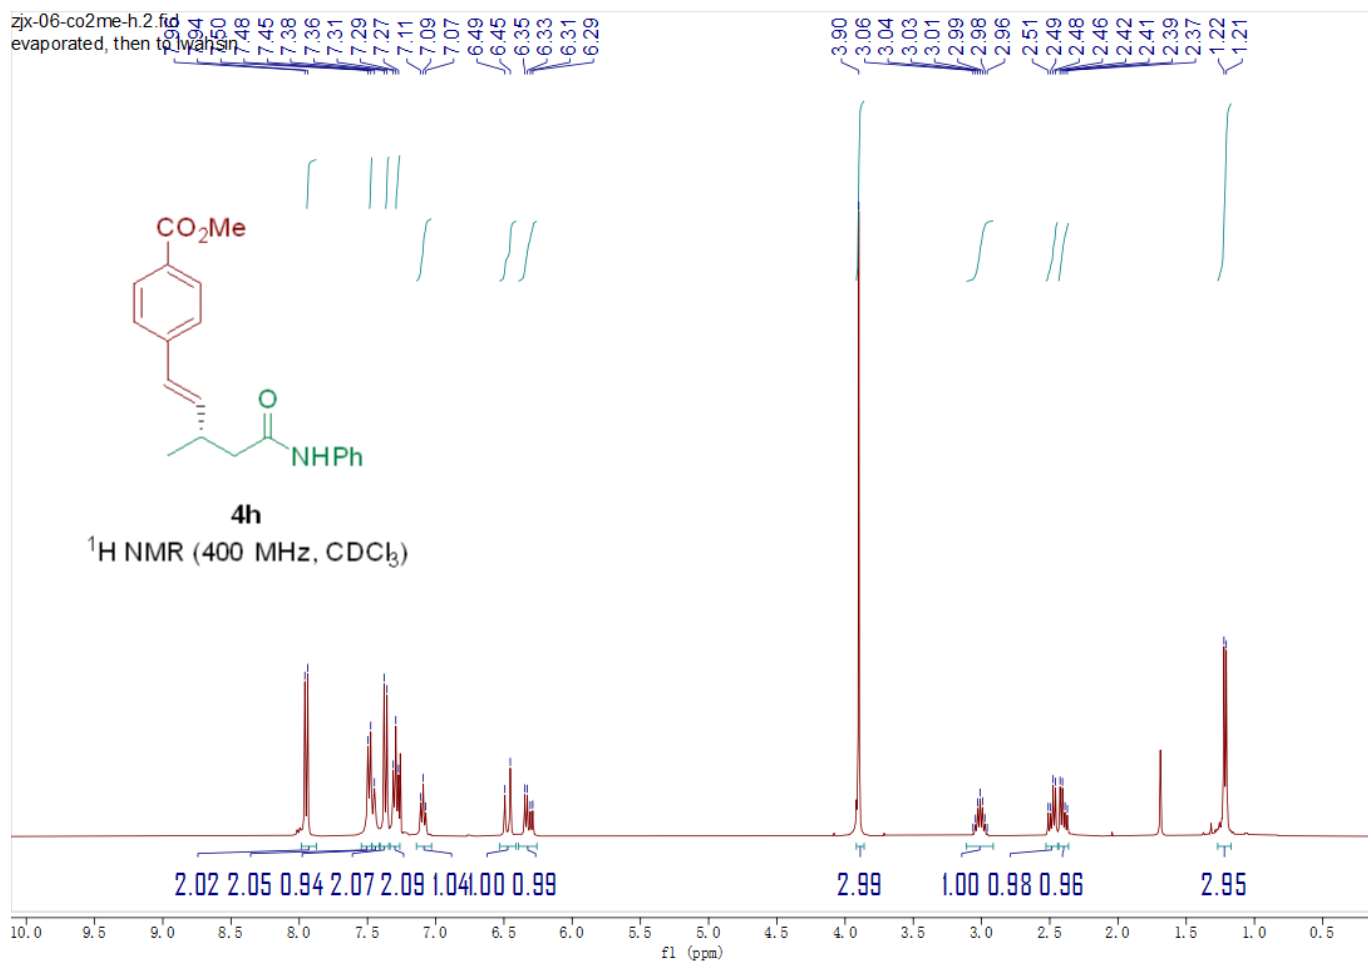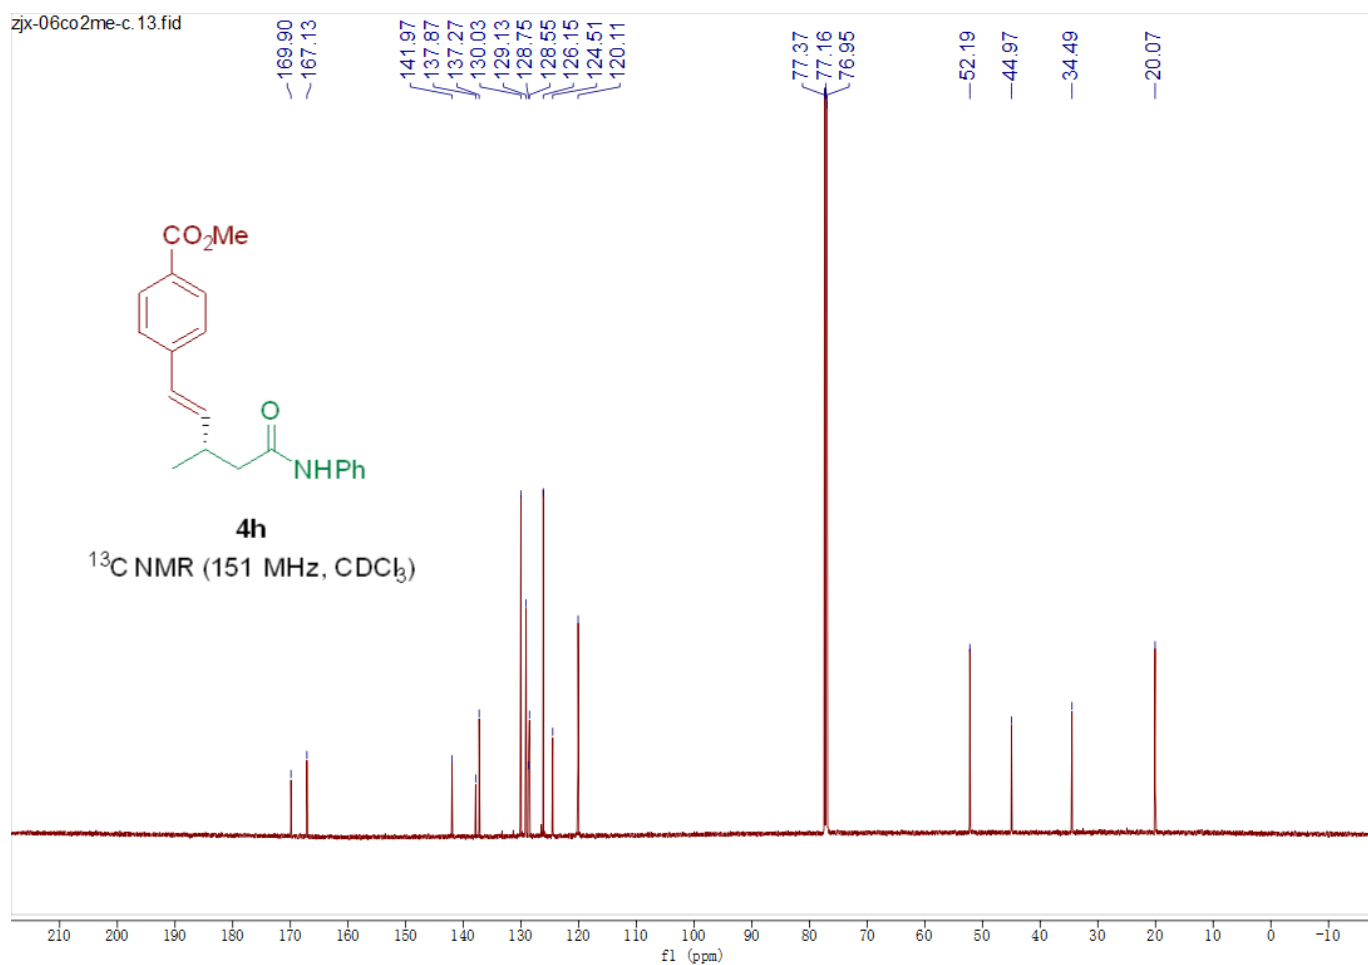

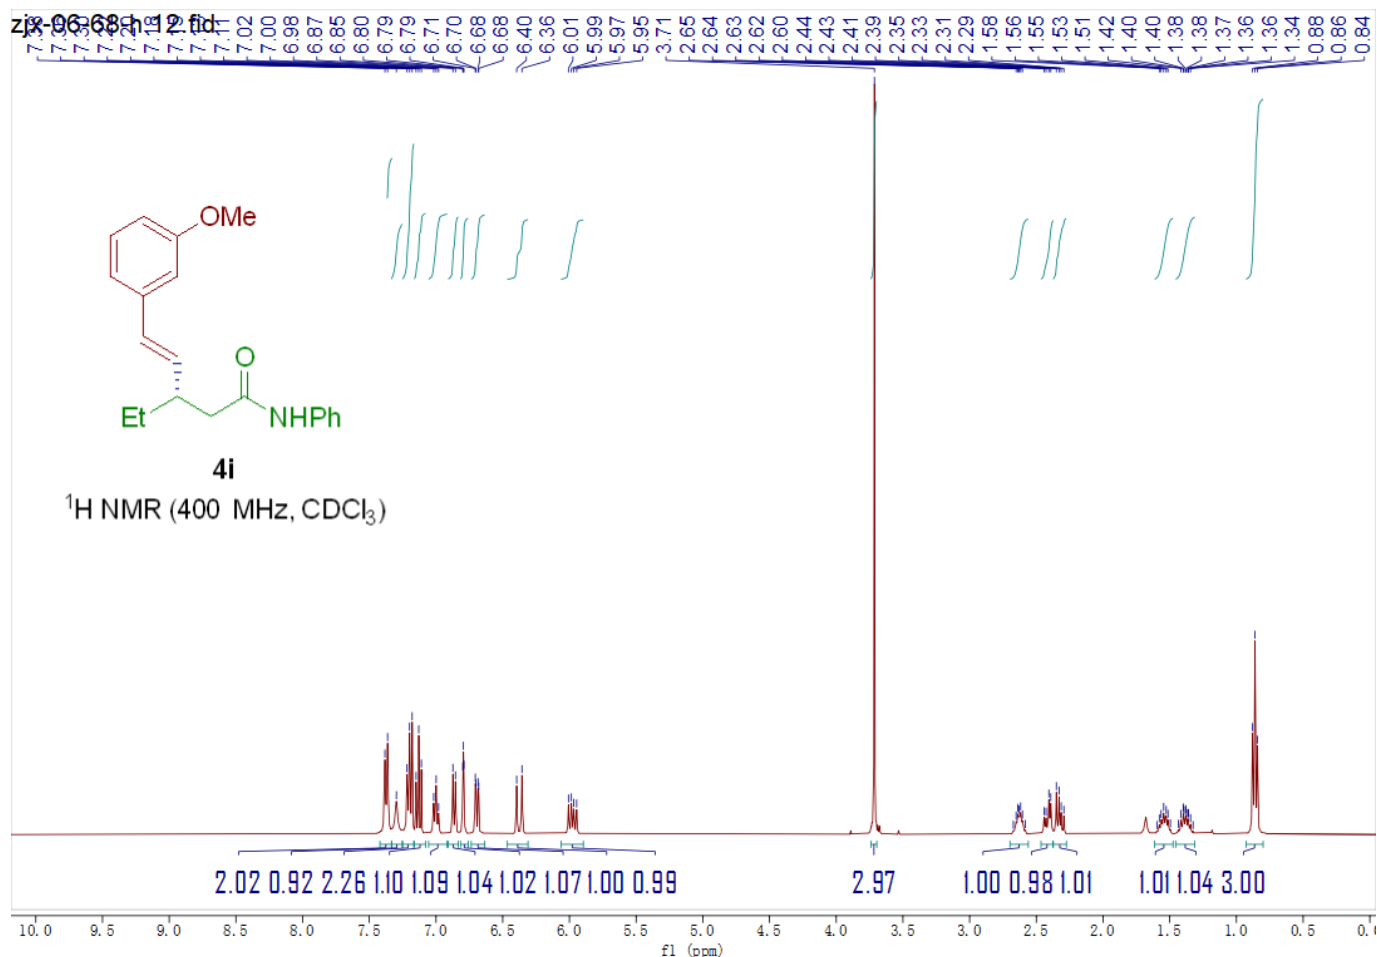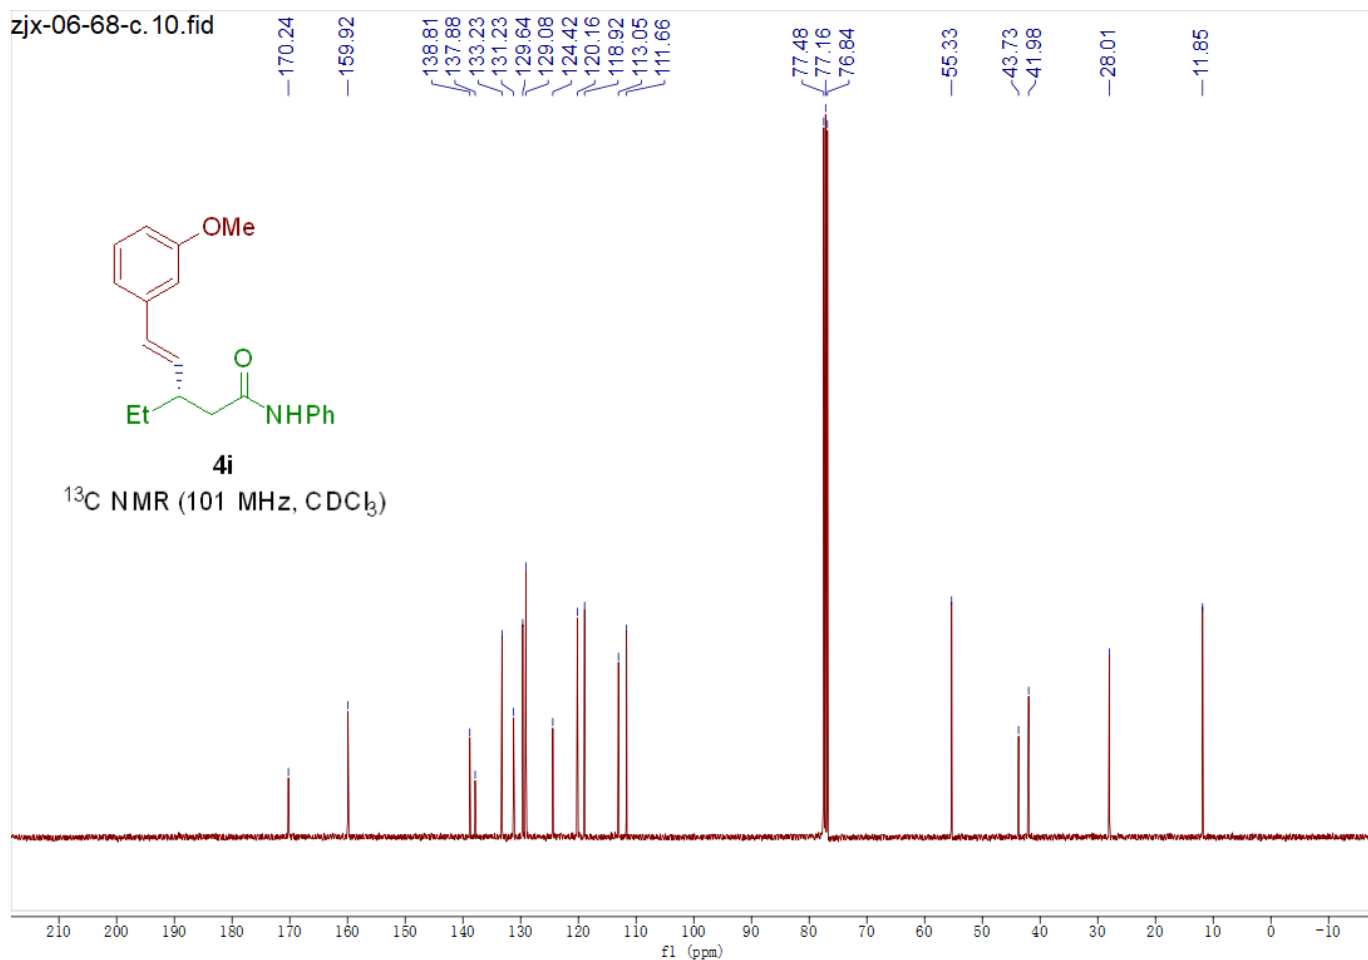

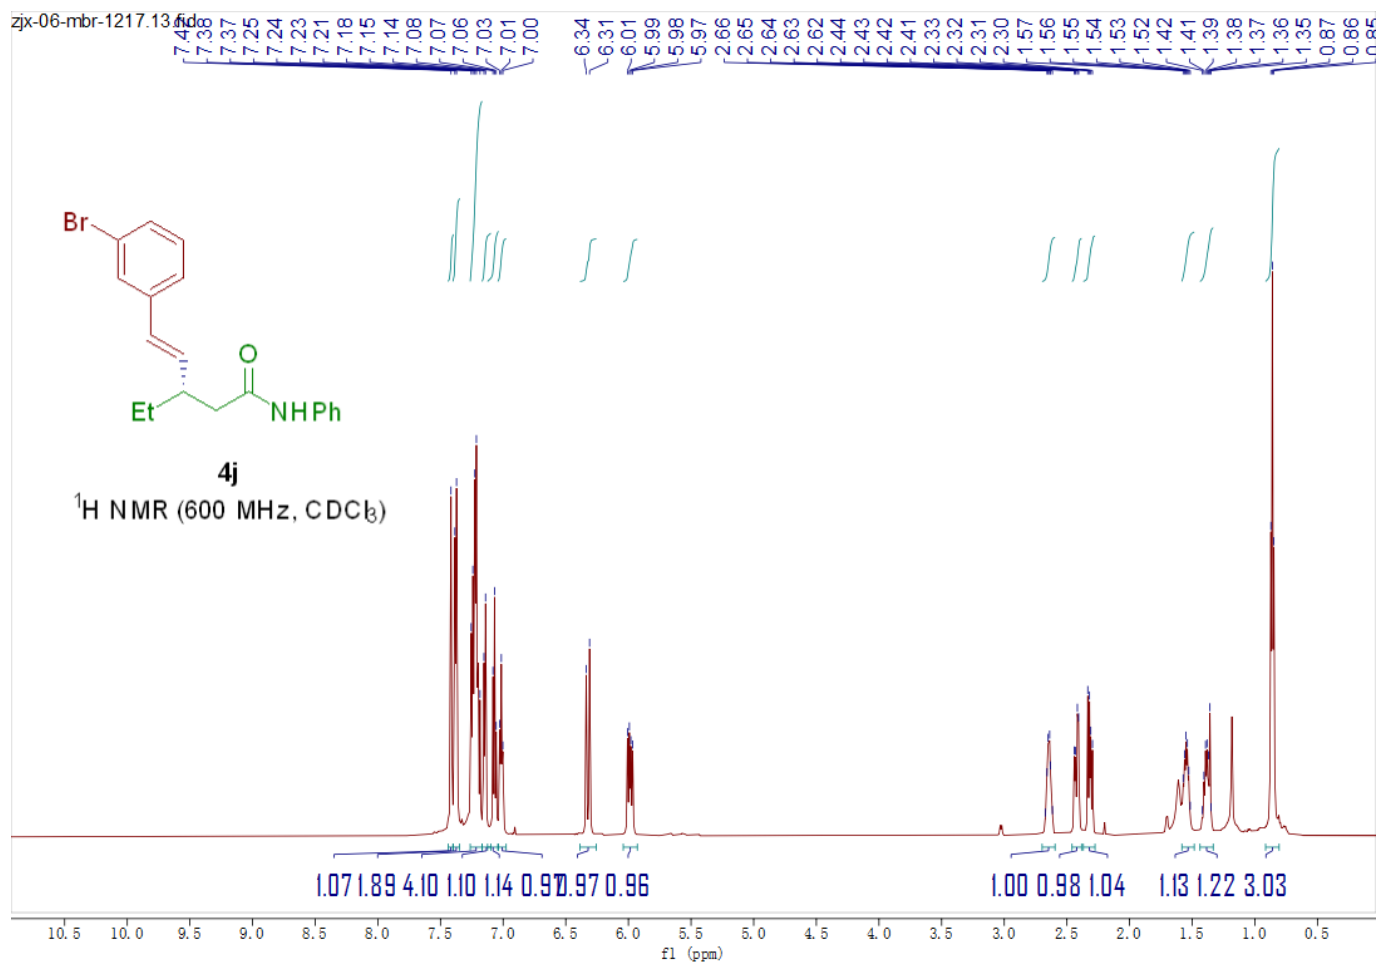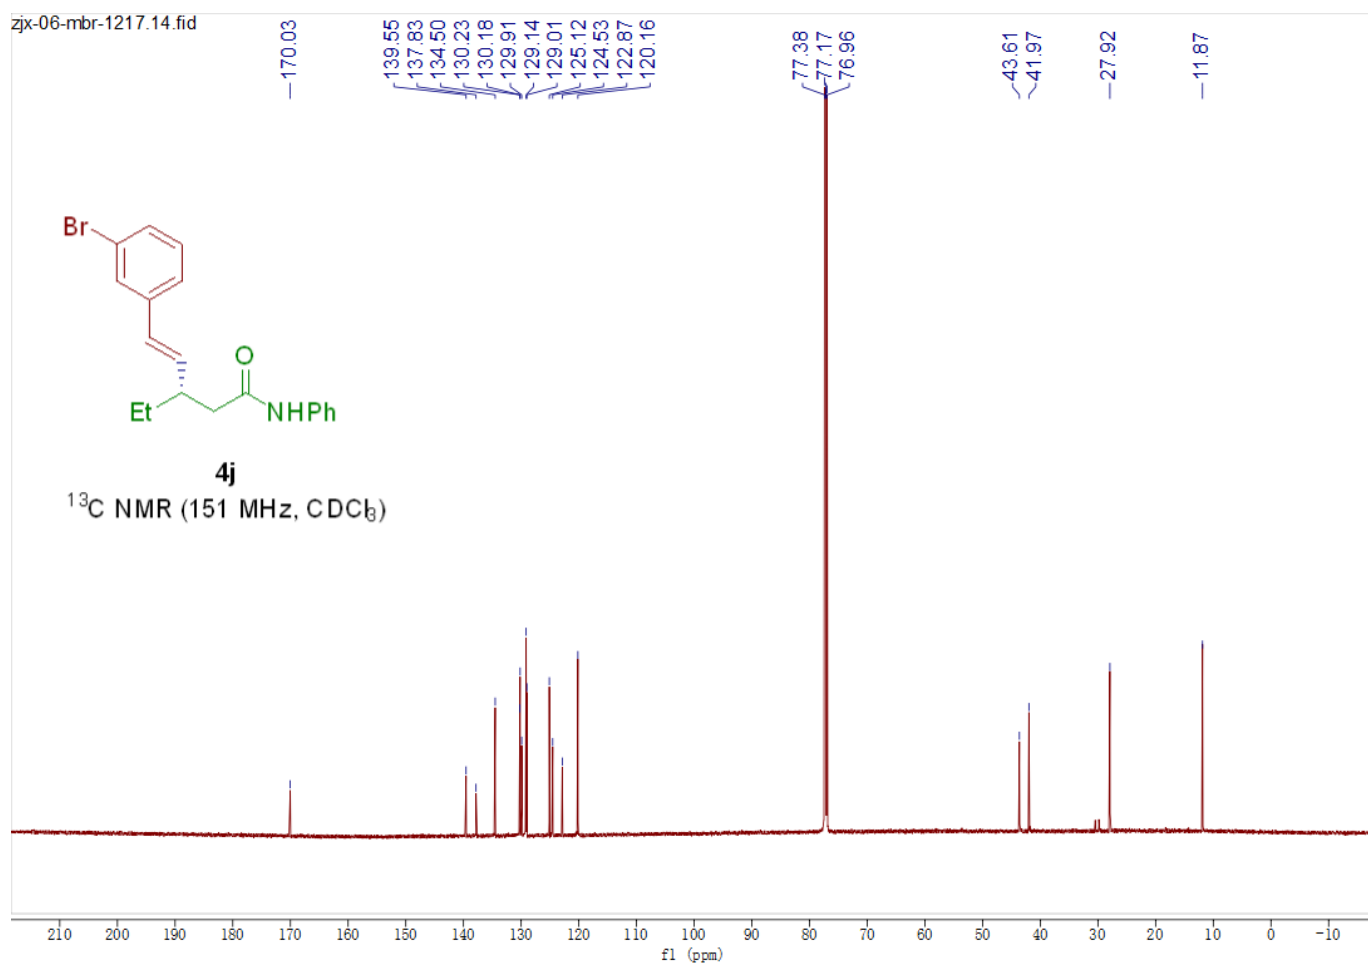

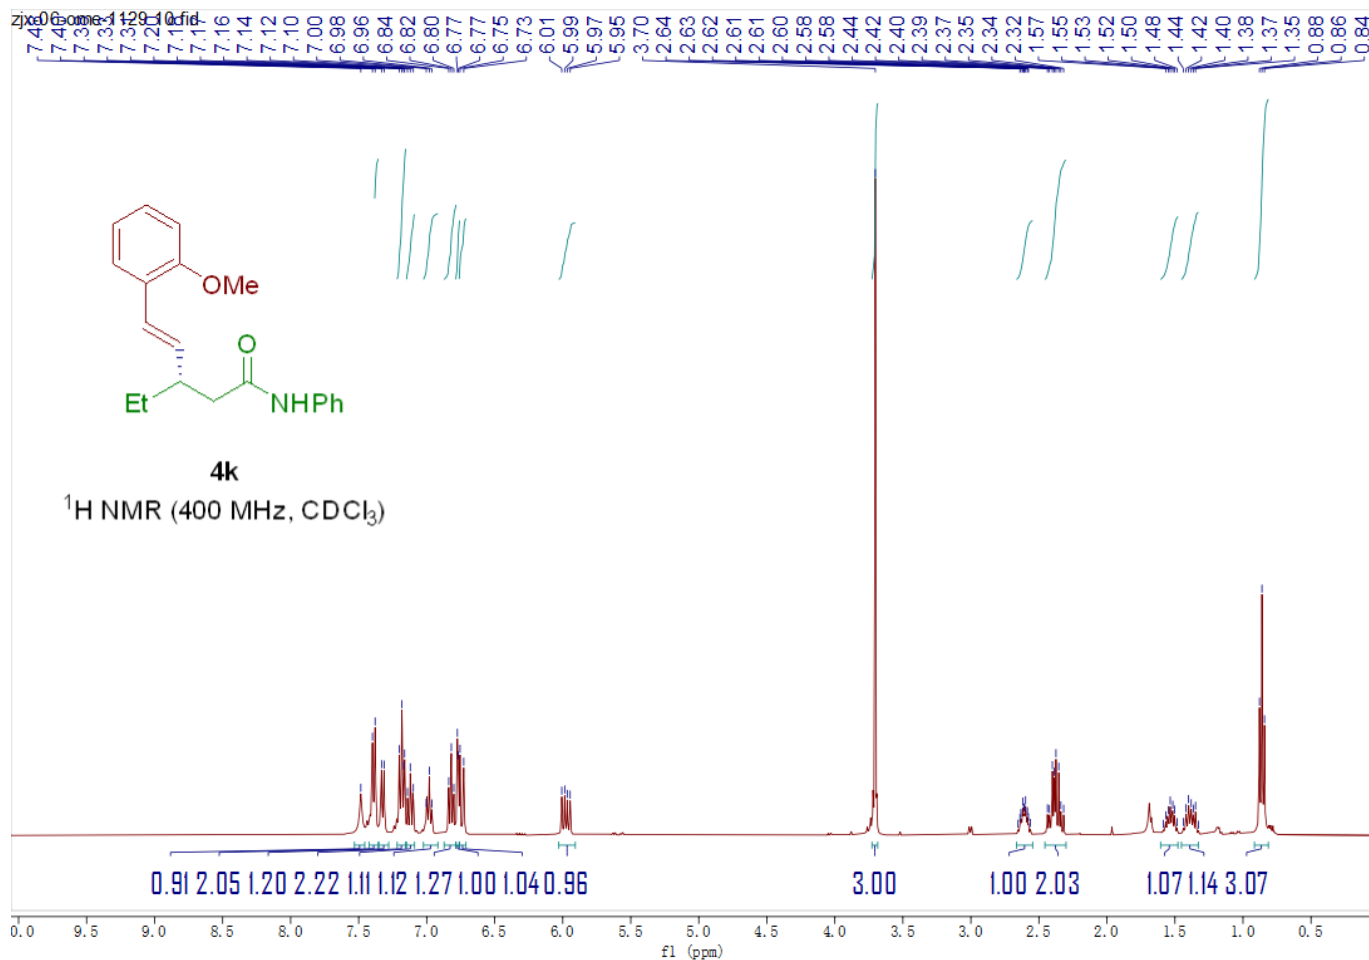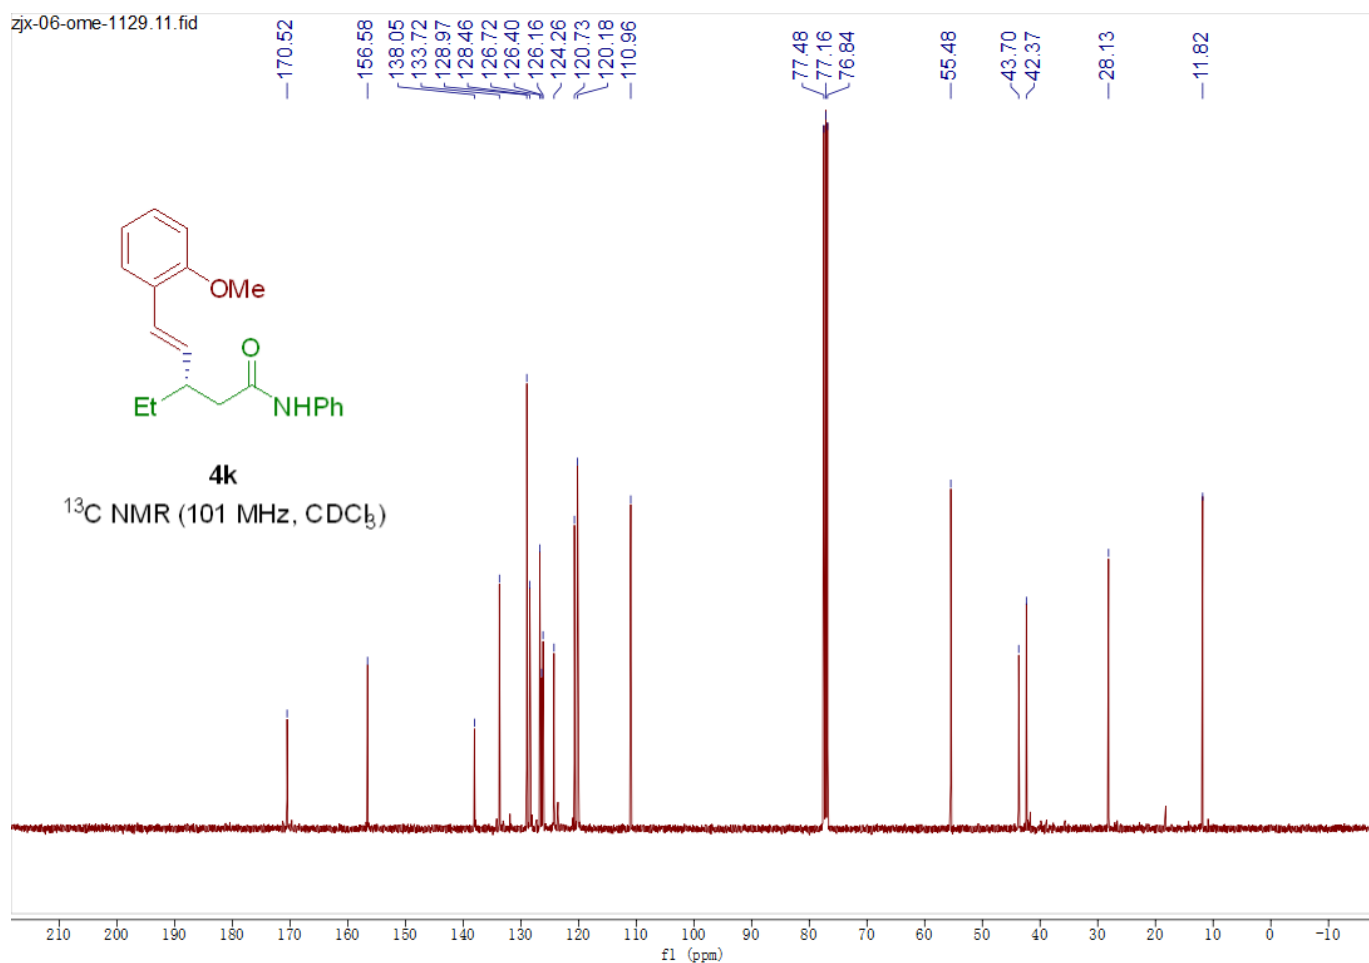



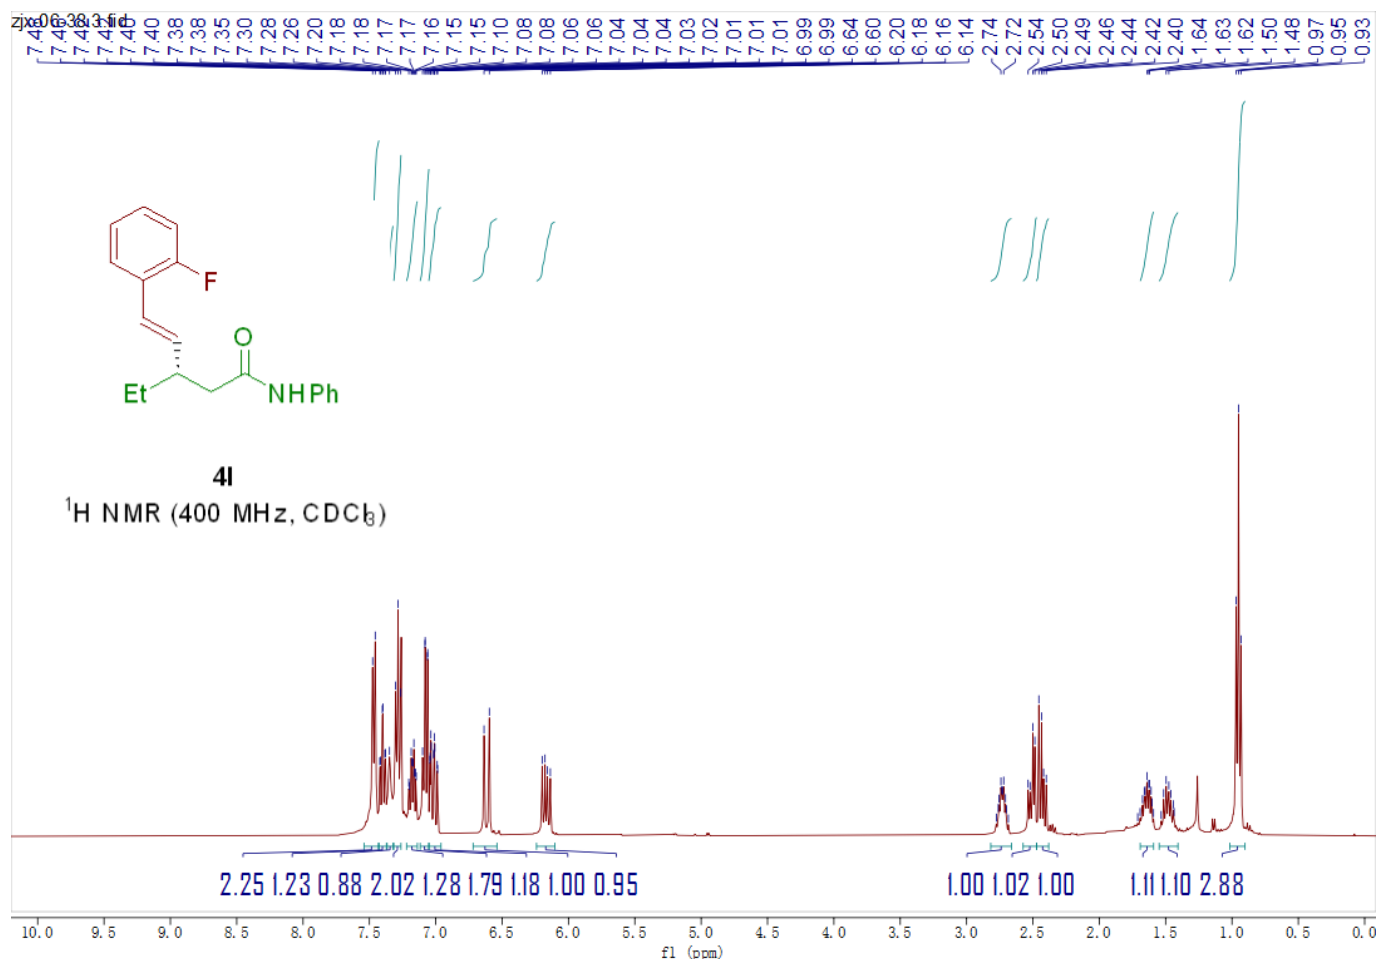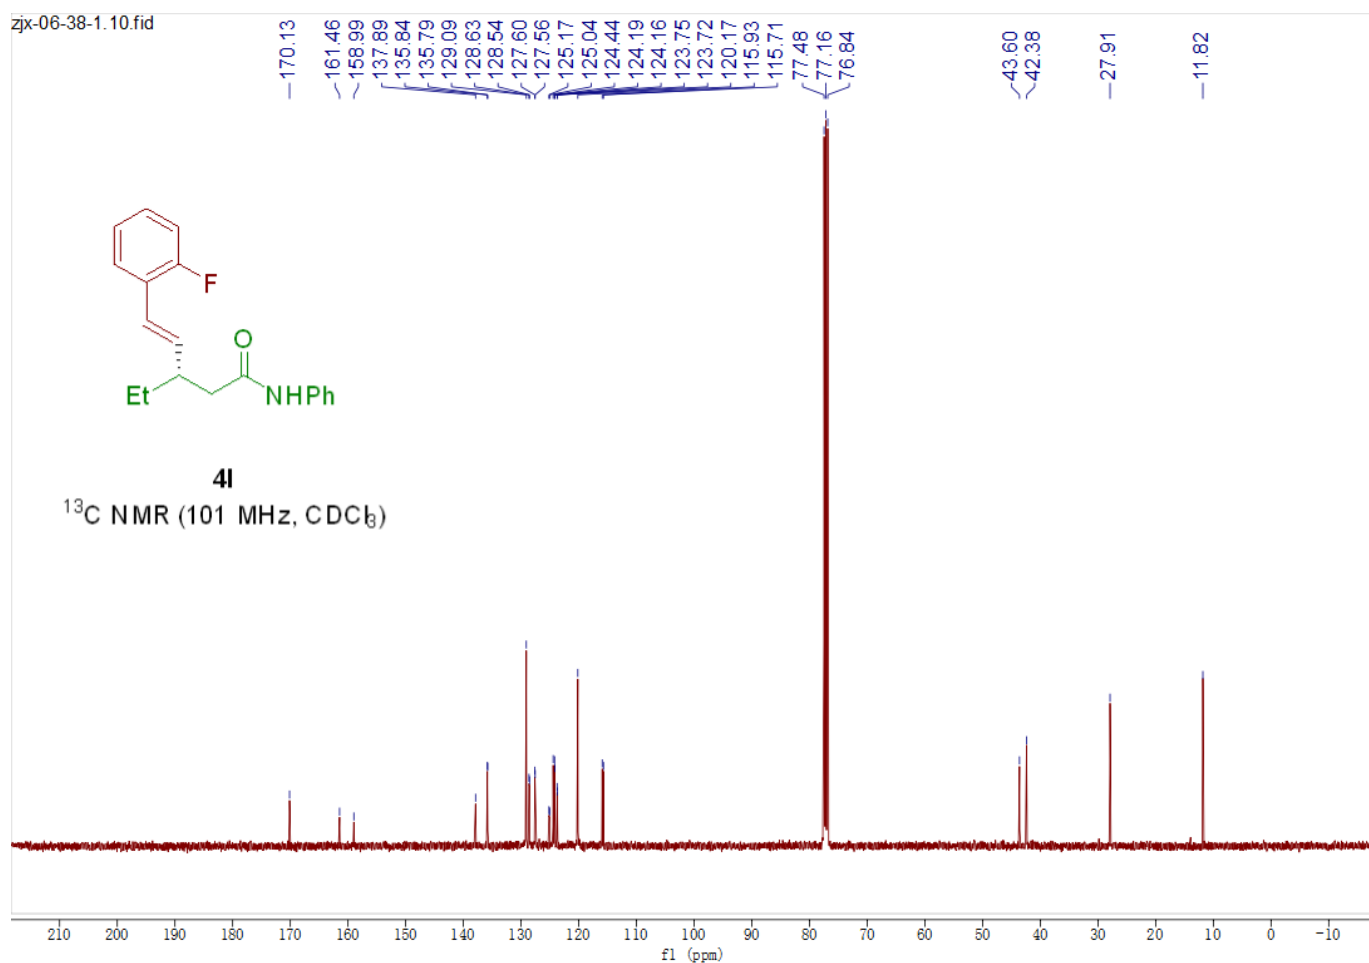

zjx-06-38-1.11.fid

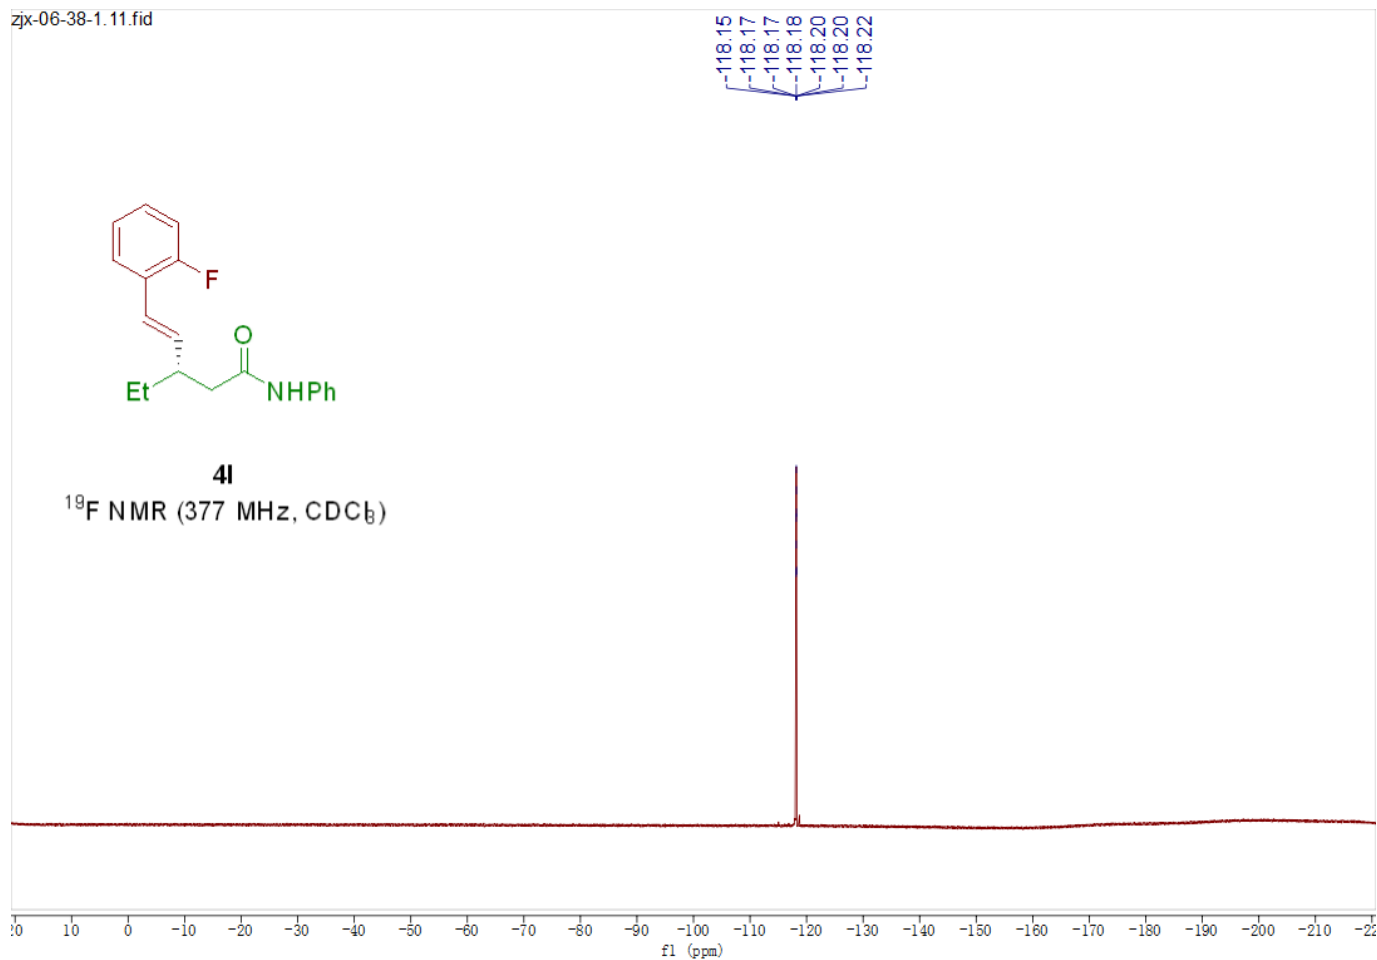

zjx-06-116.1.fid

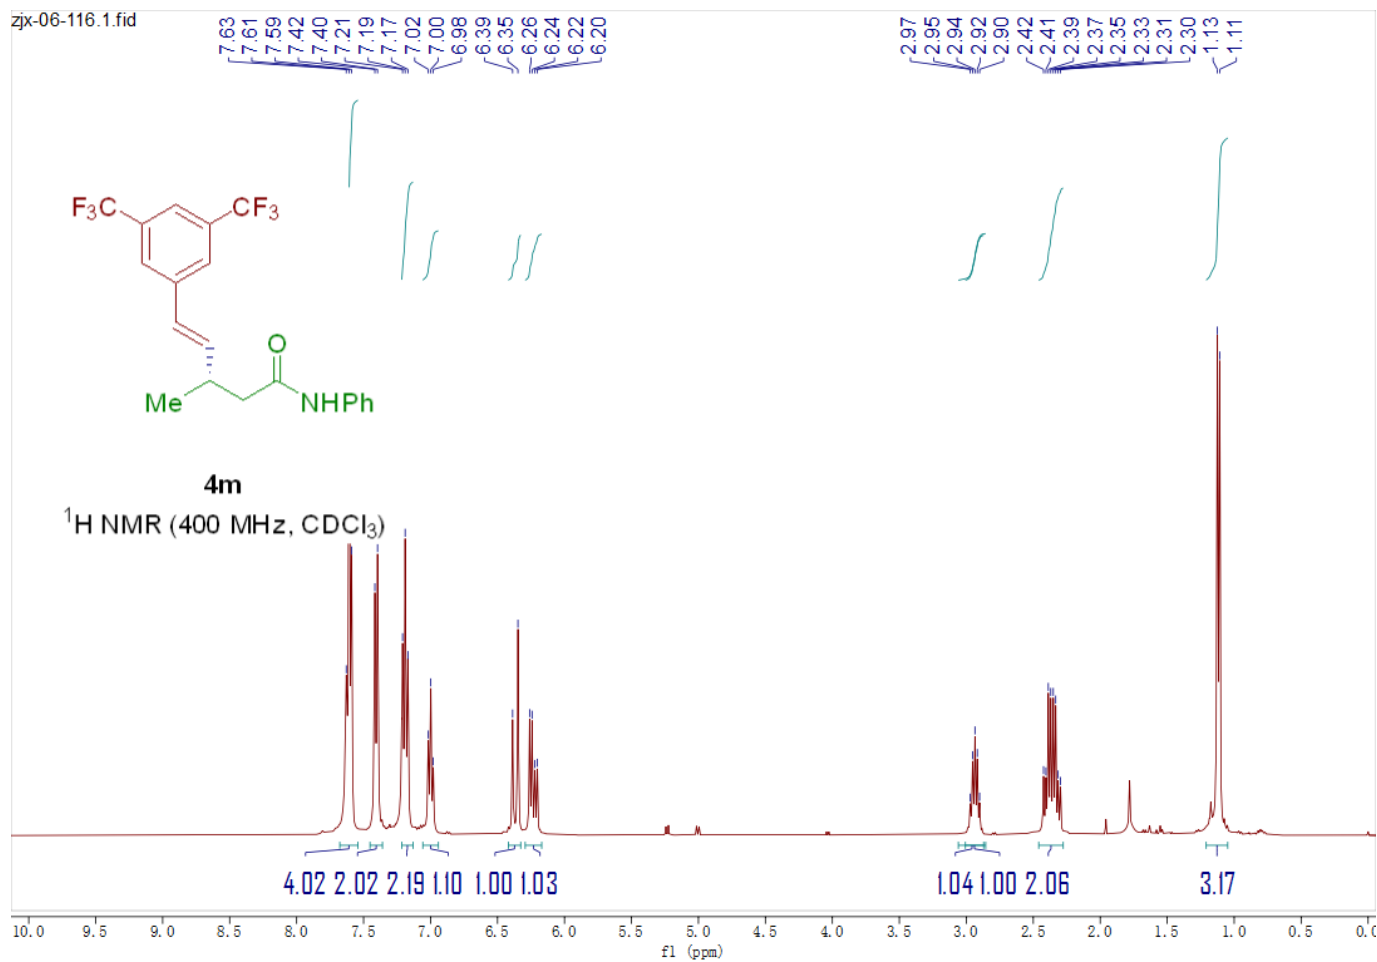

zjx-06-116.3.fid

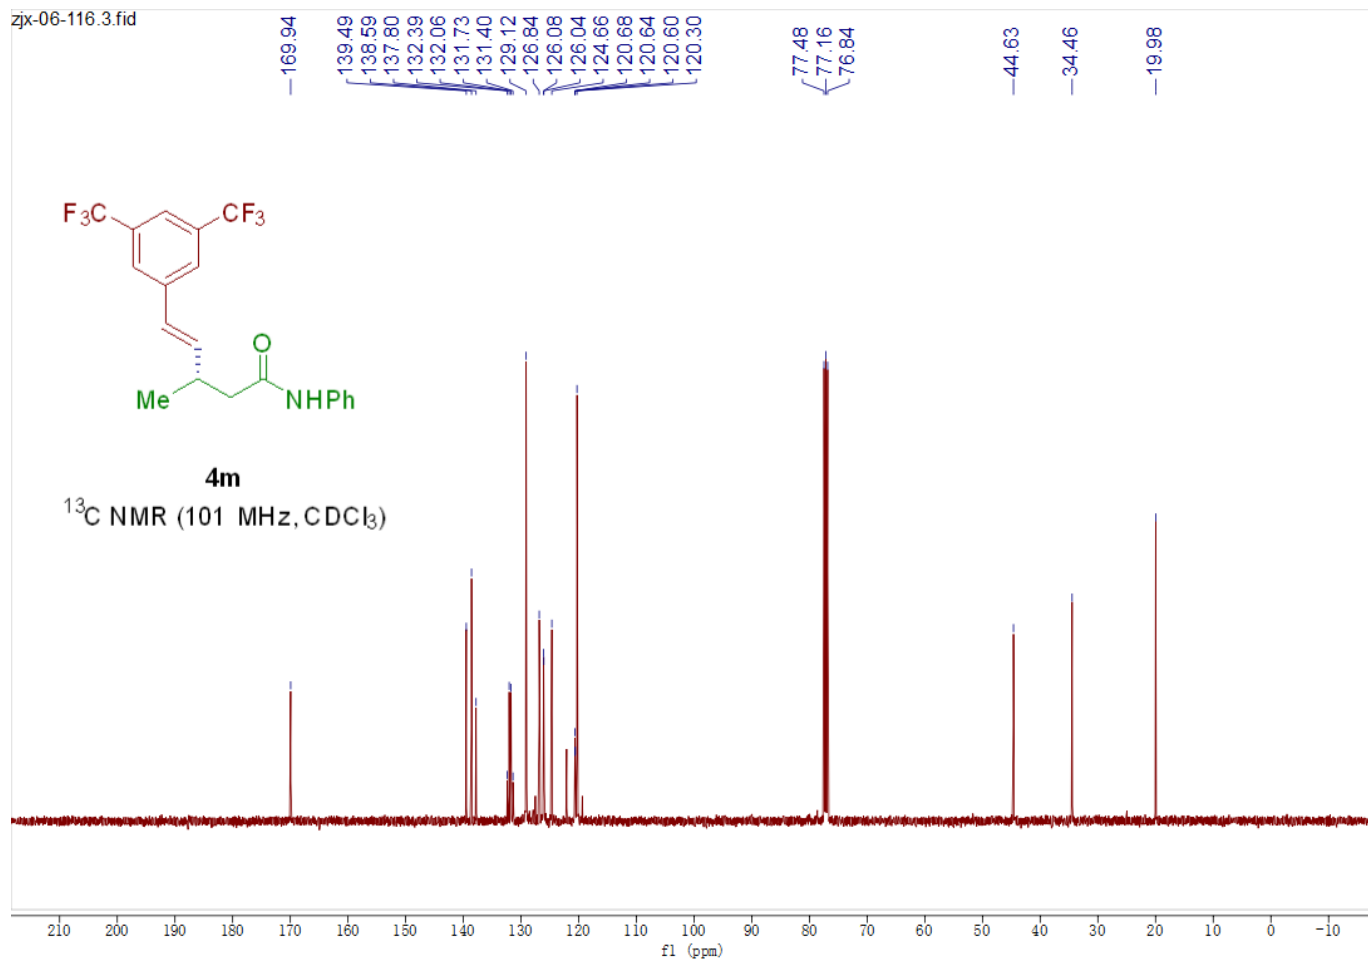

zjx-06-116.2.fid

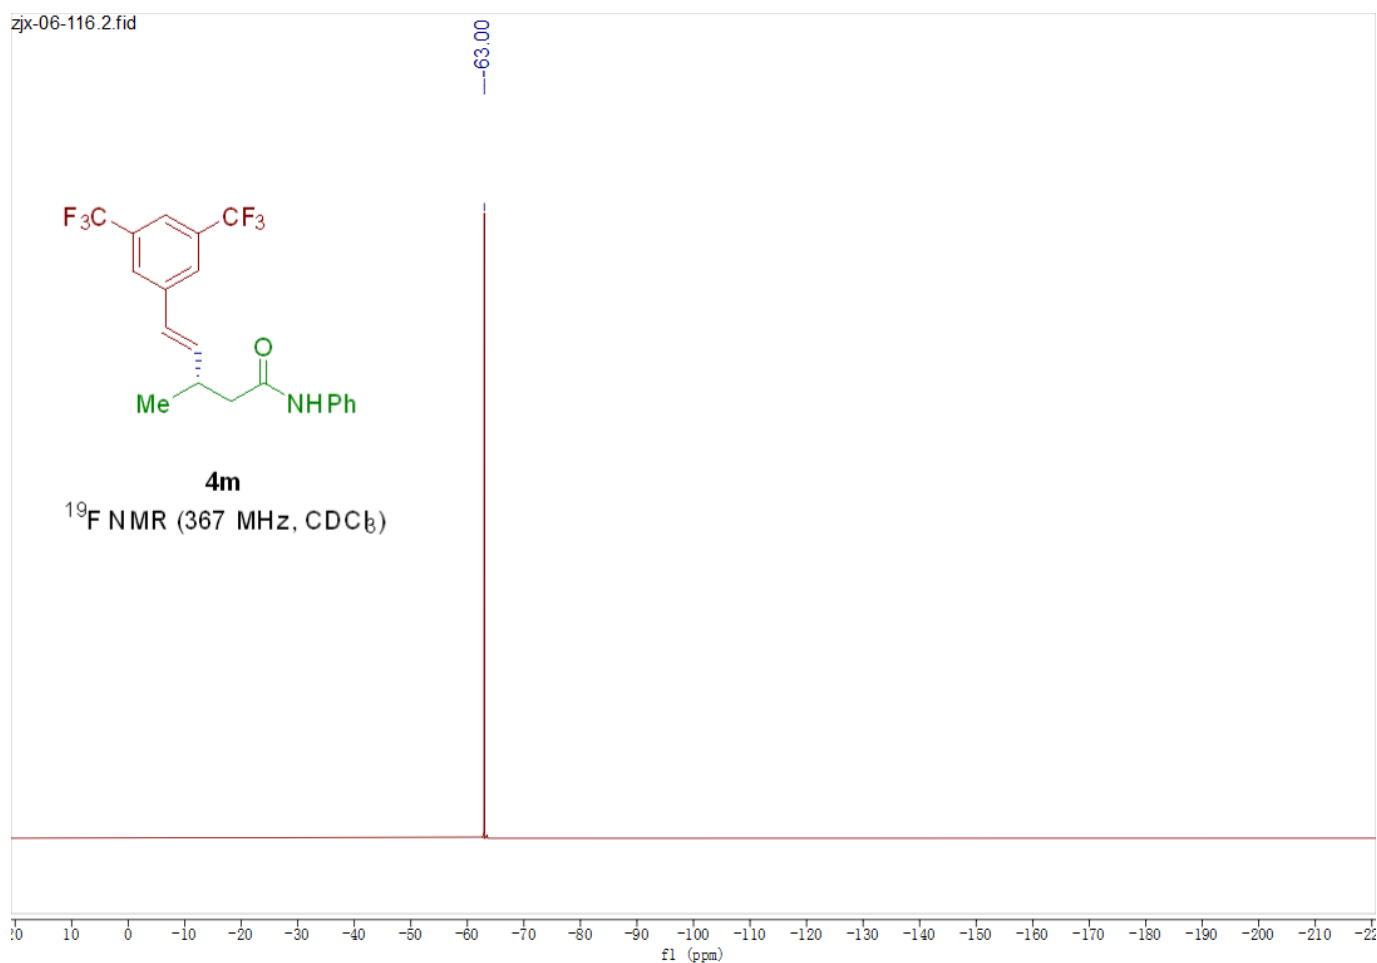

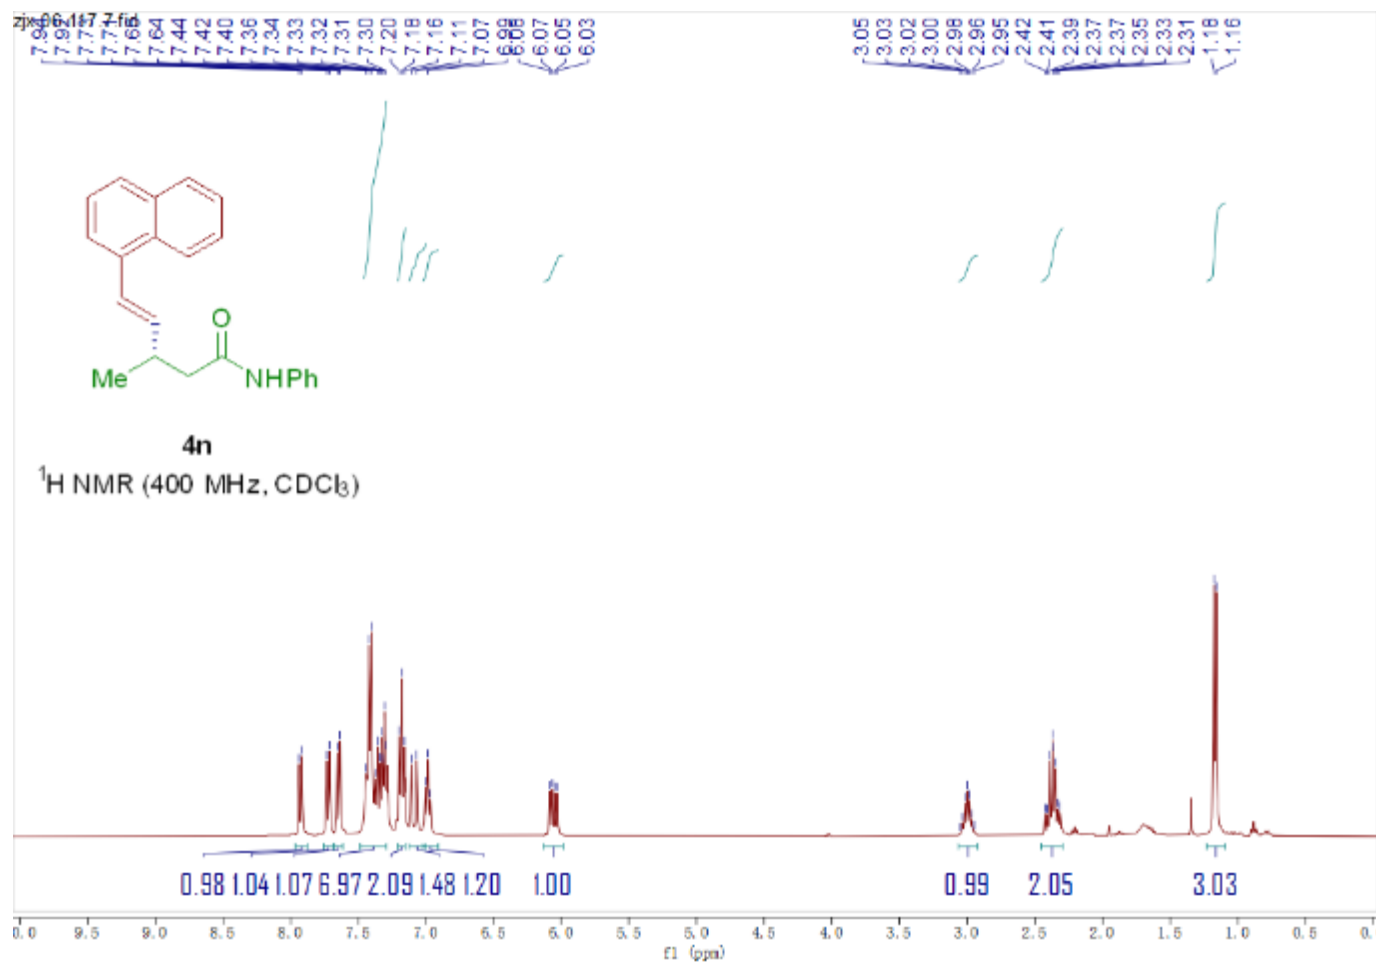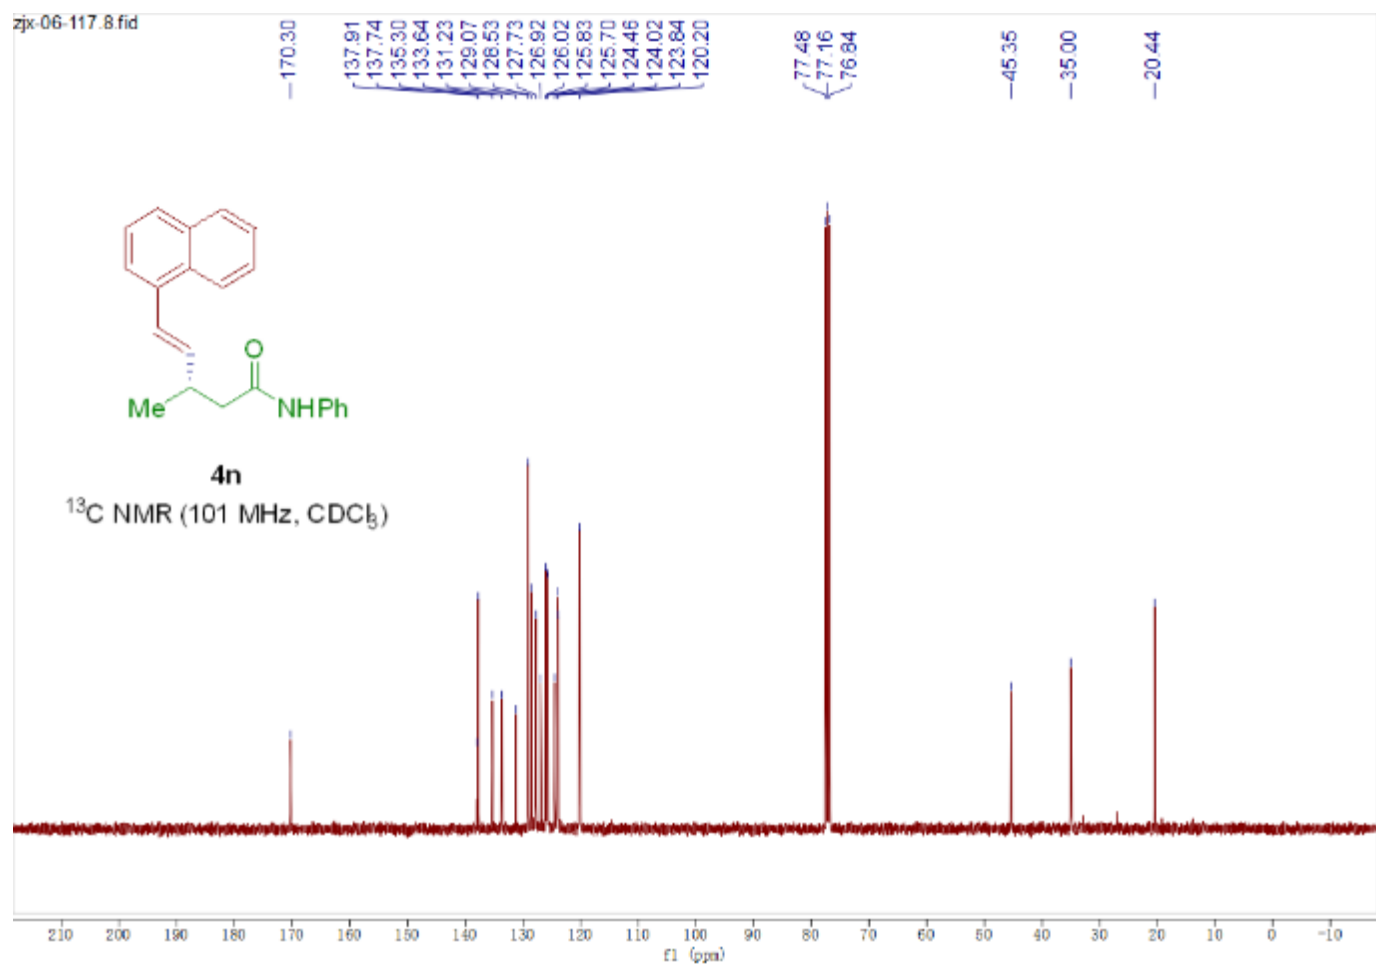

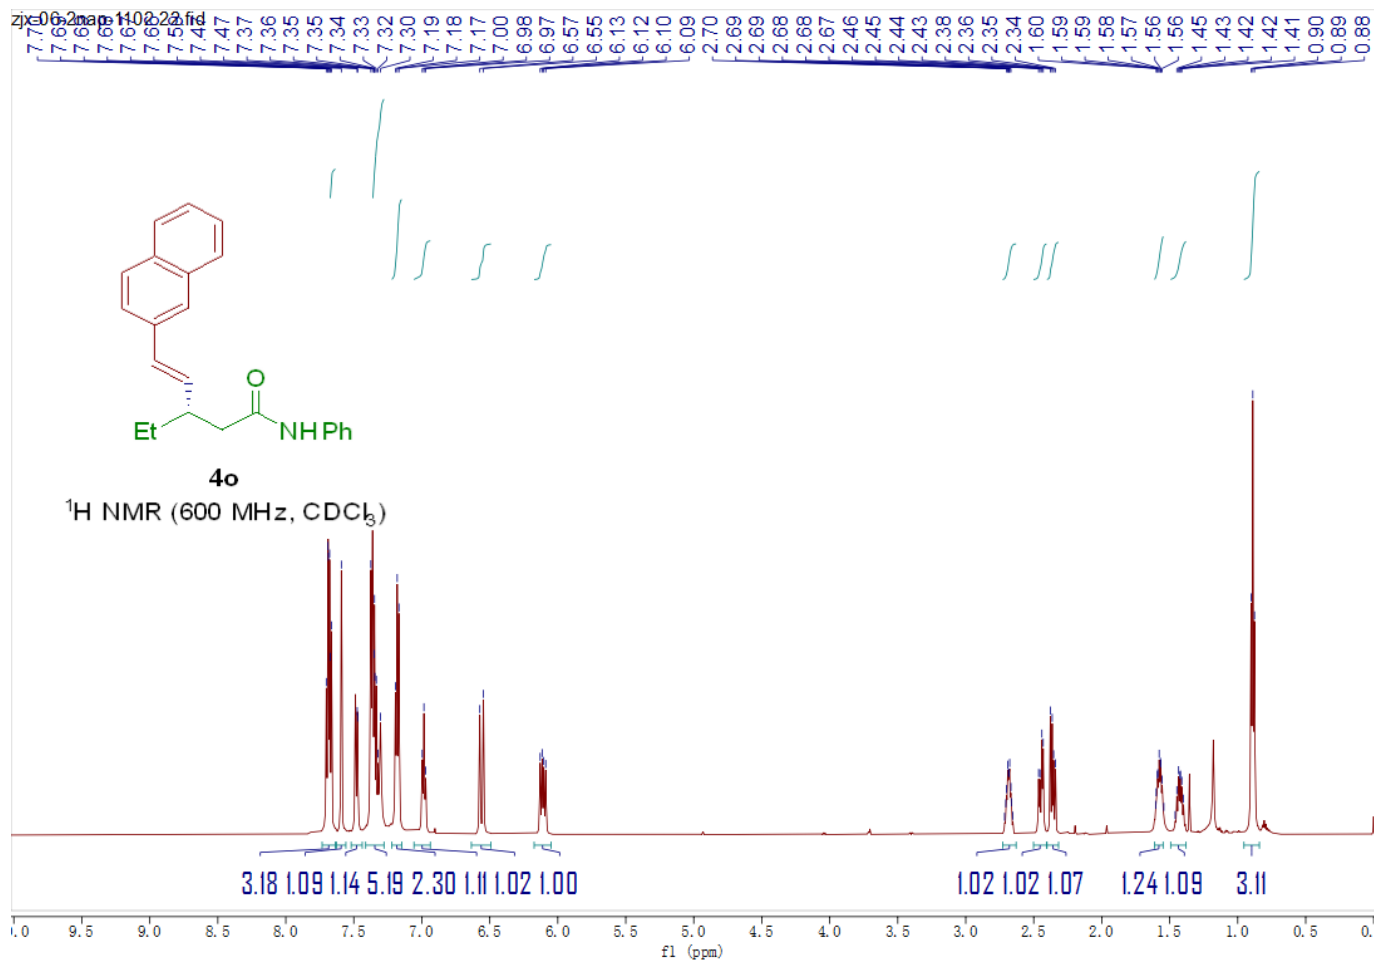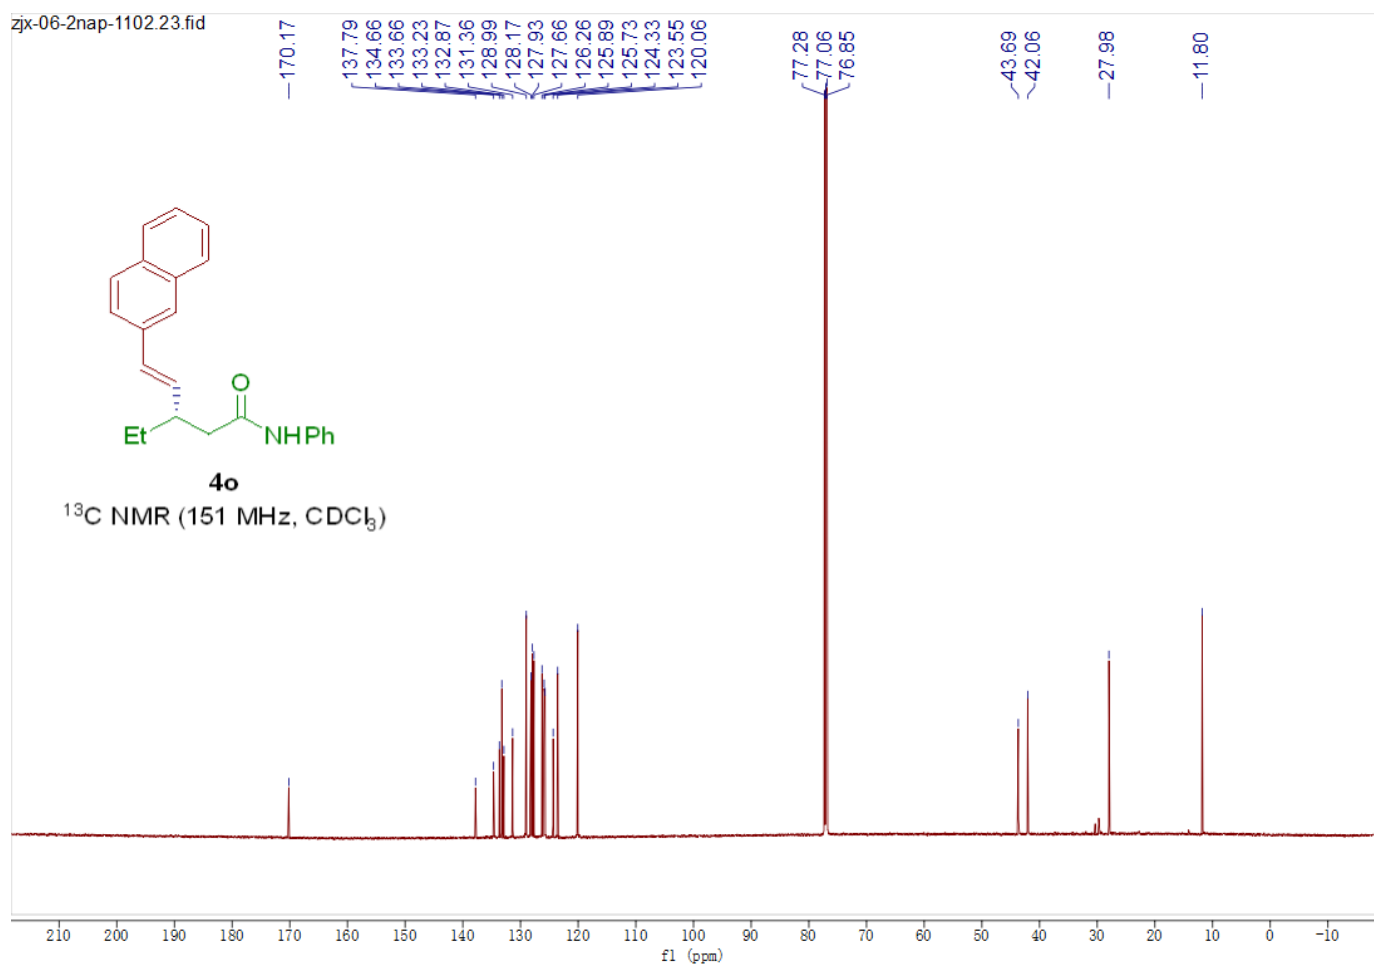

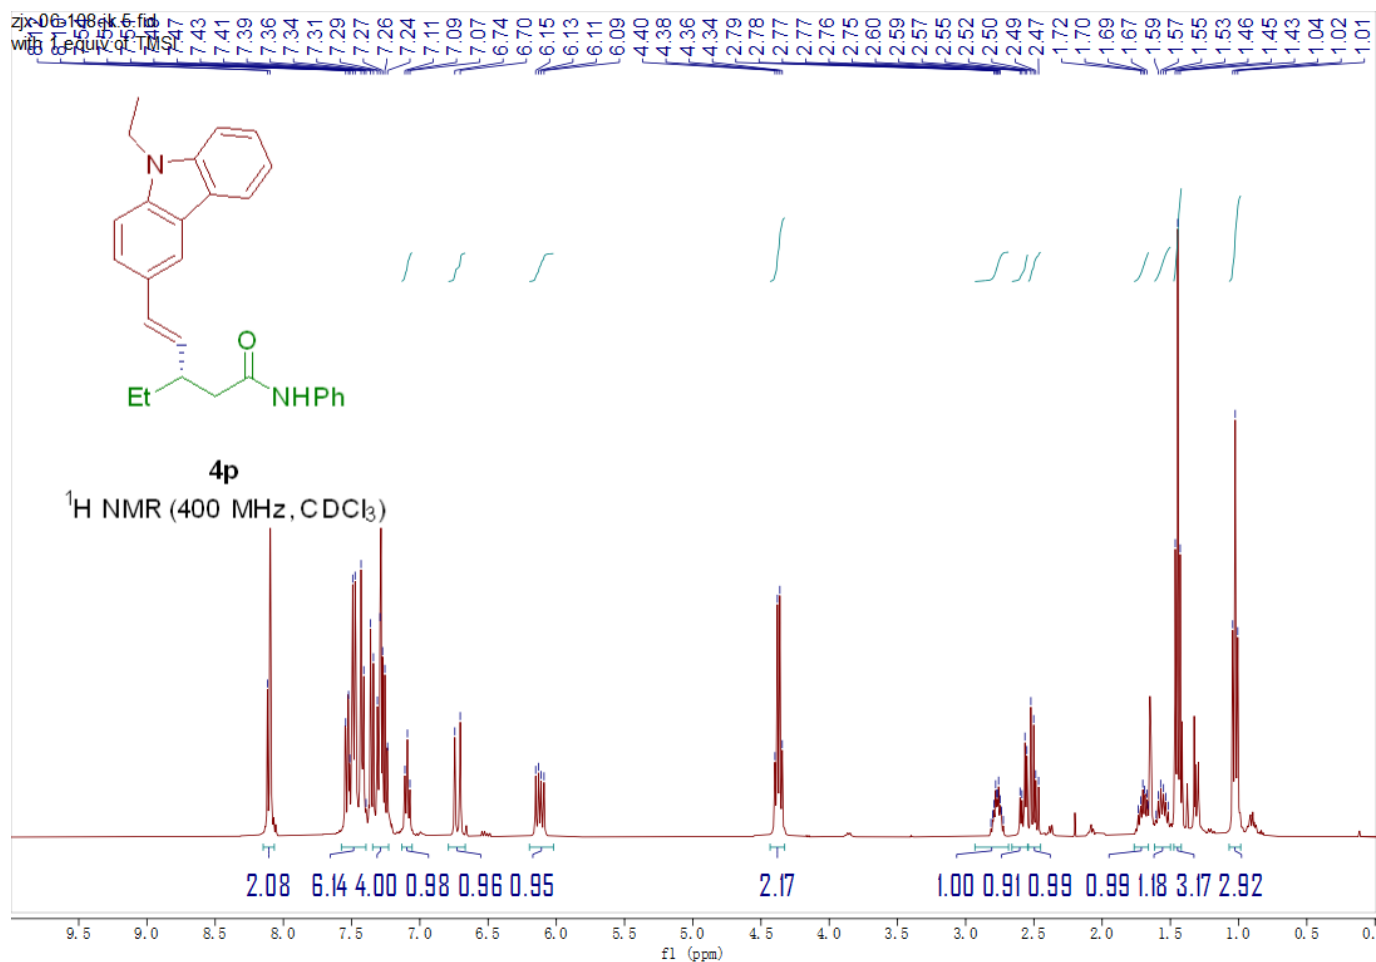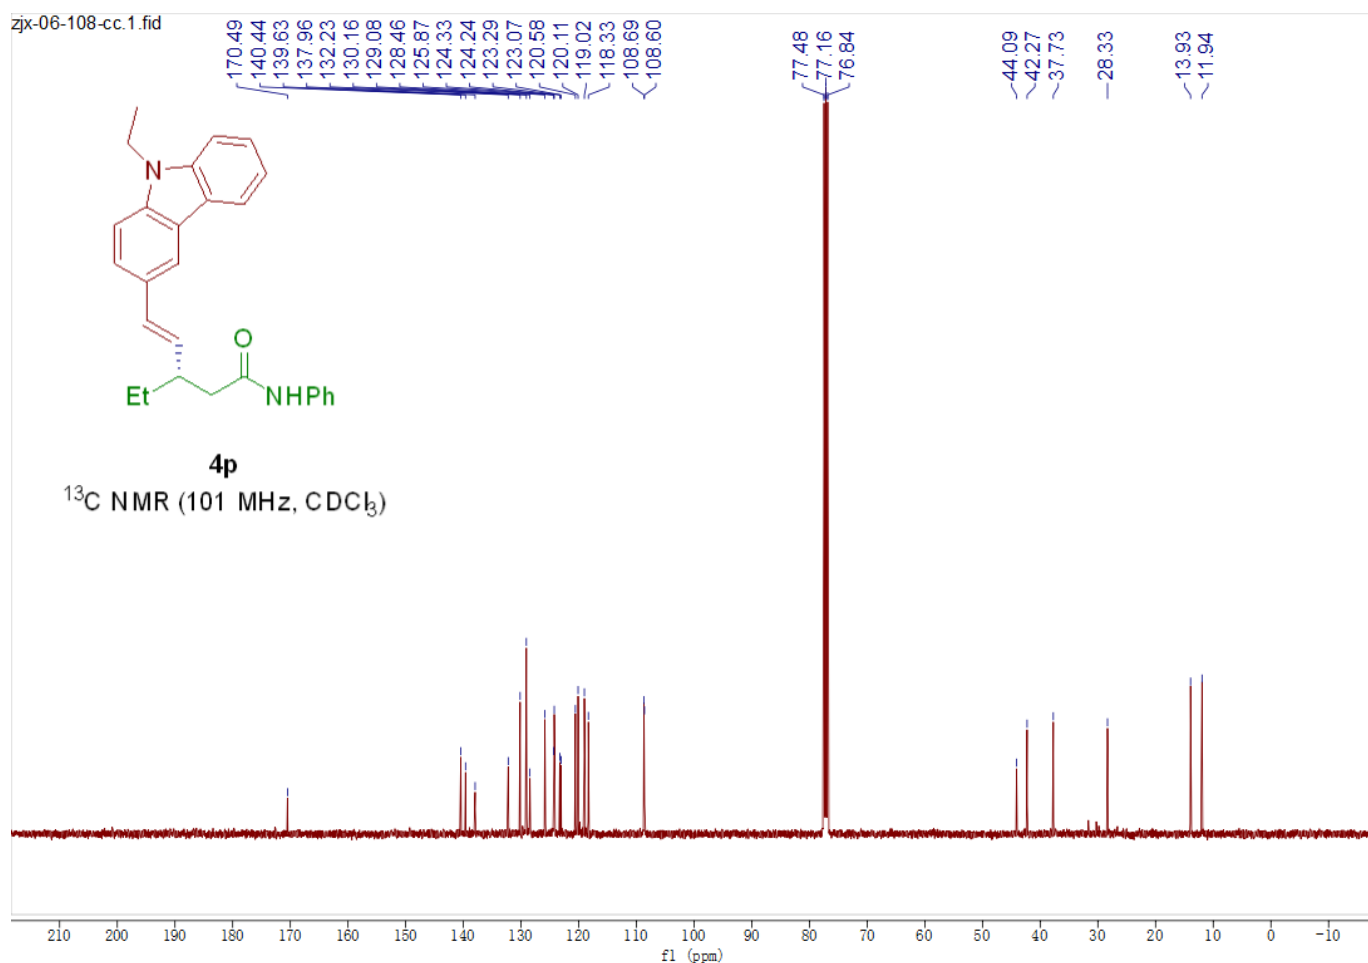

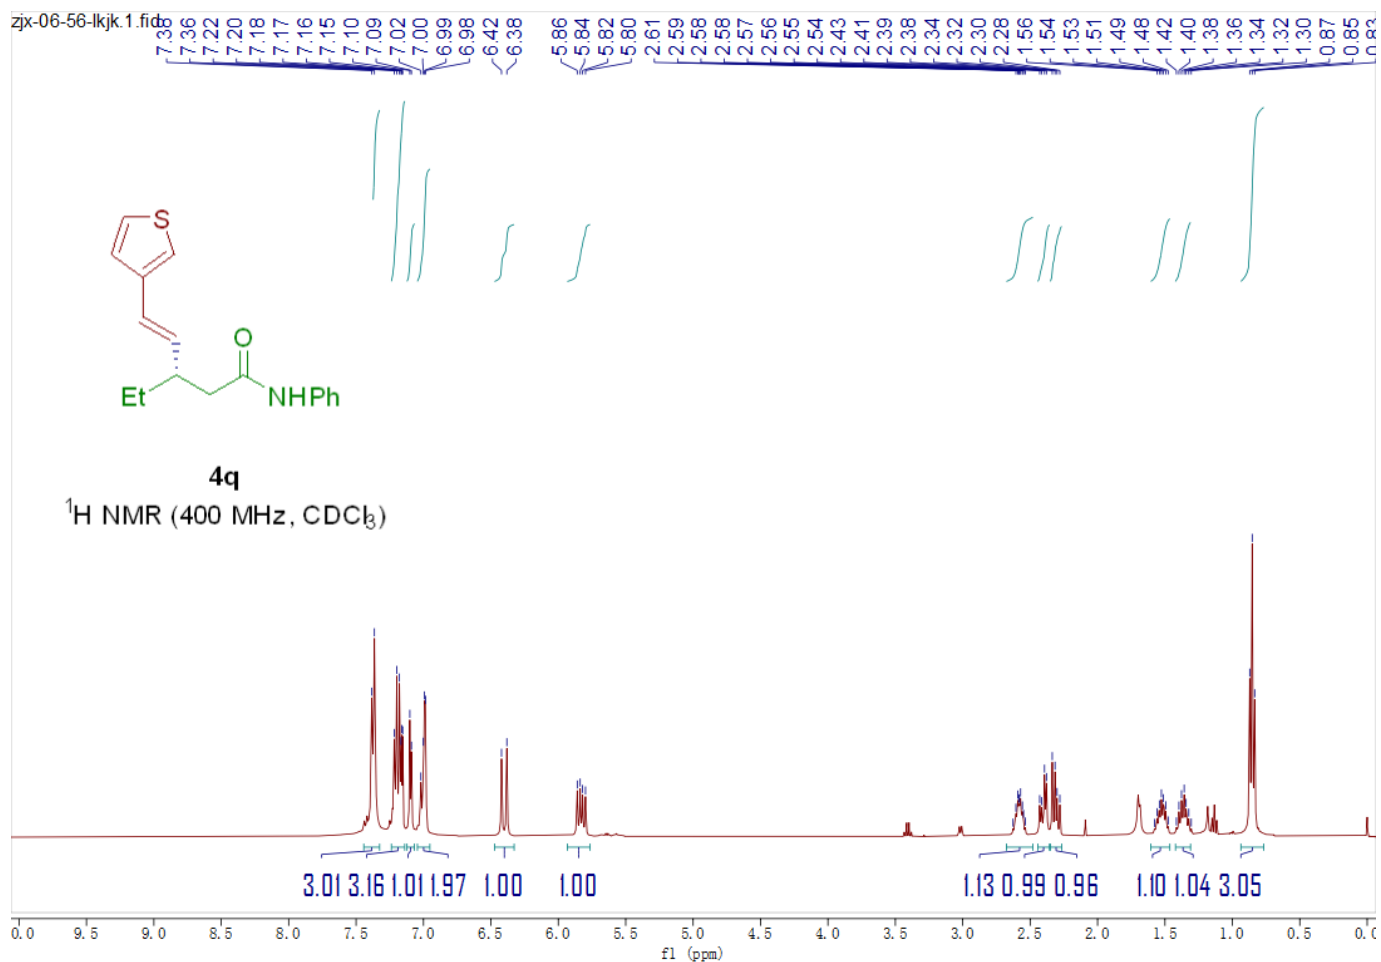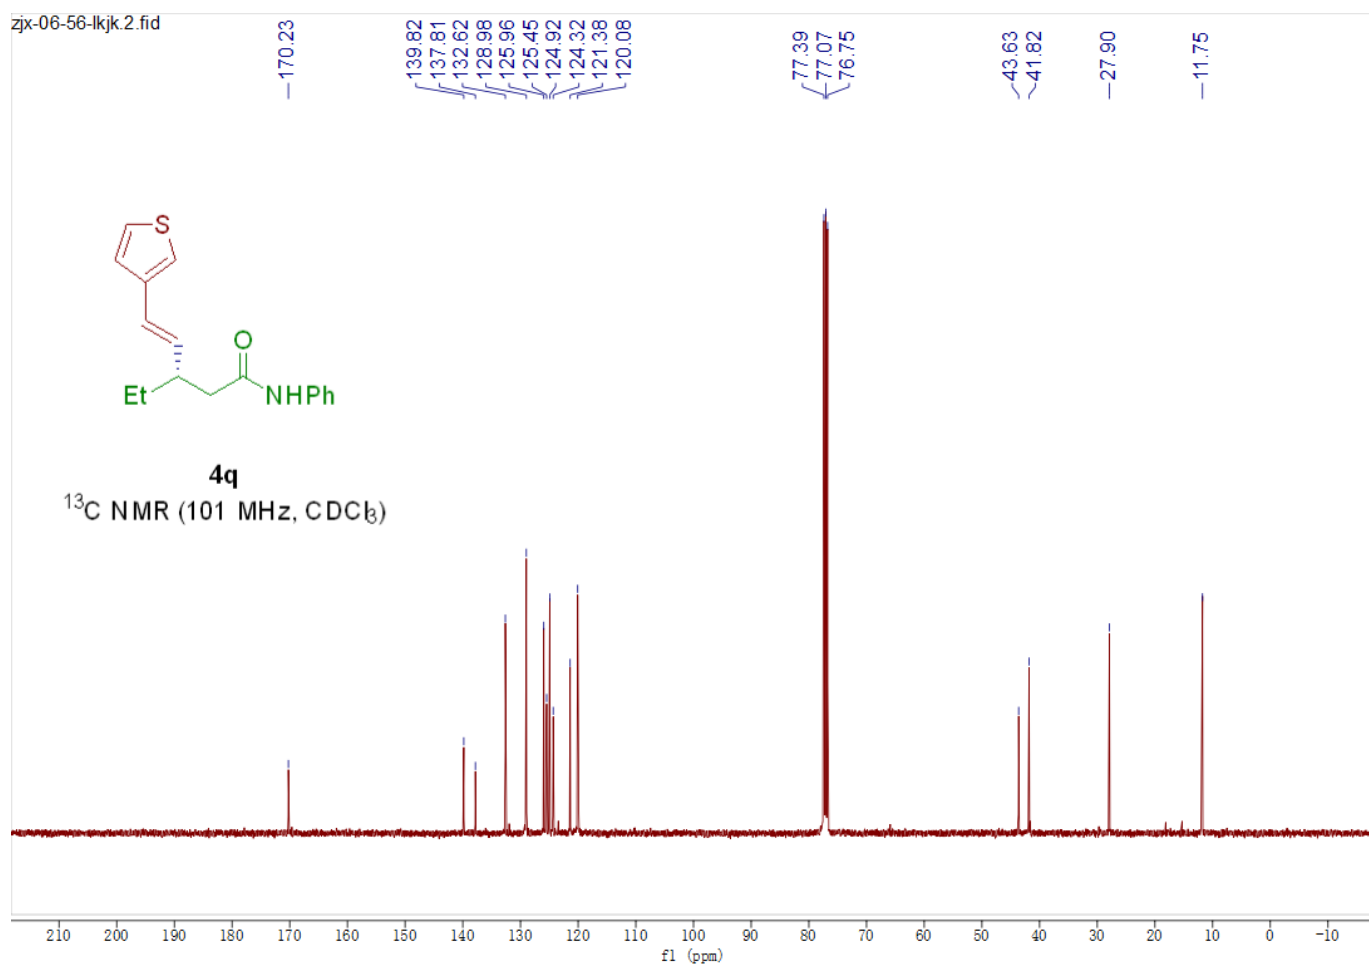

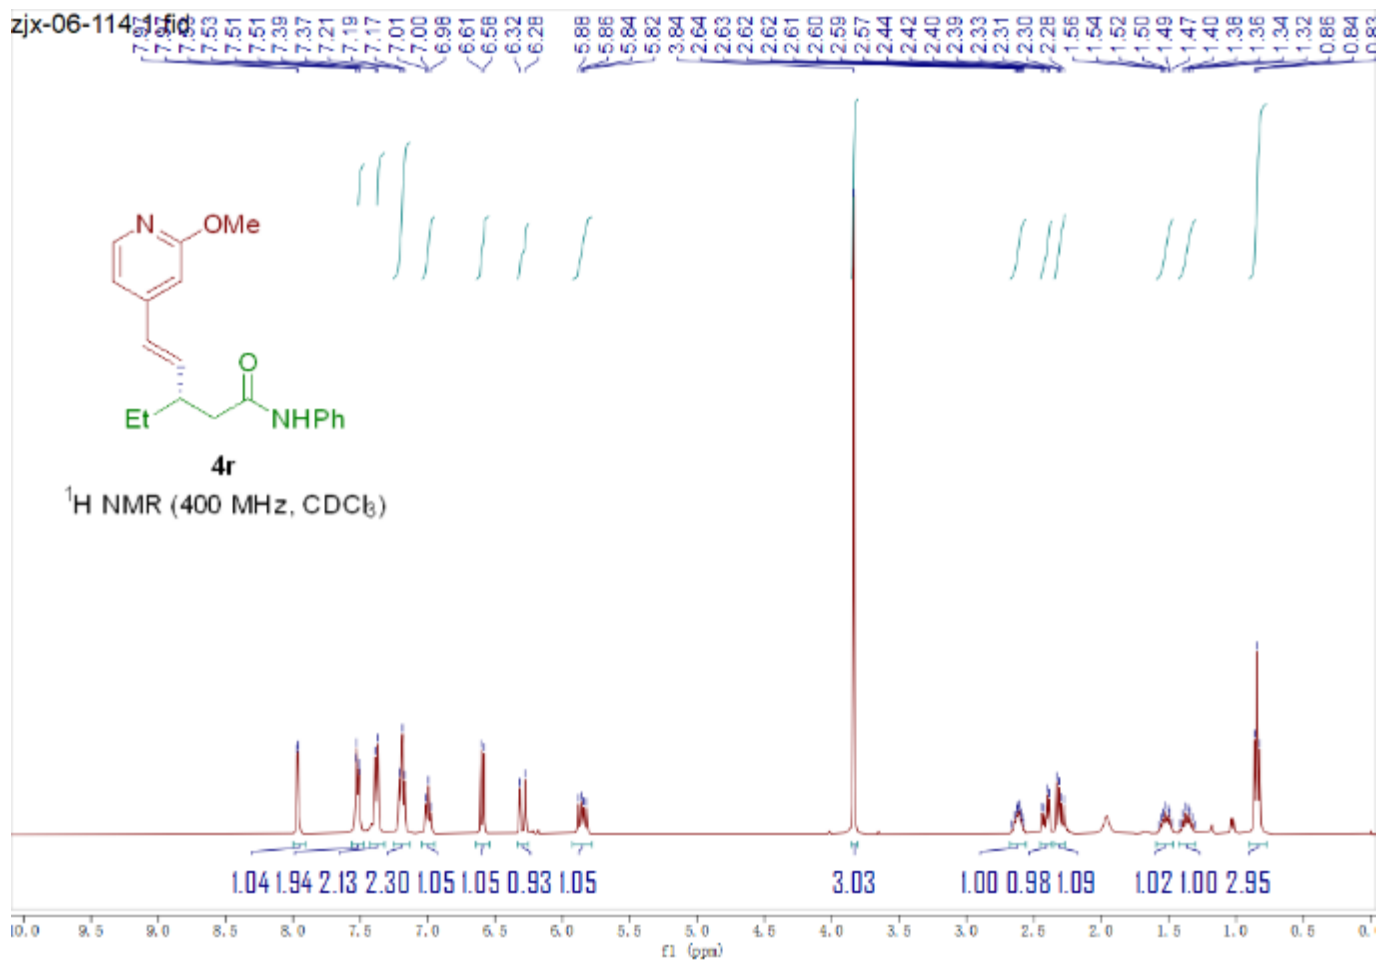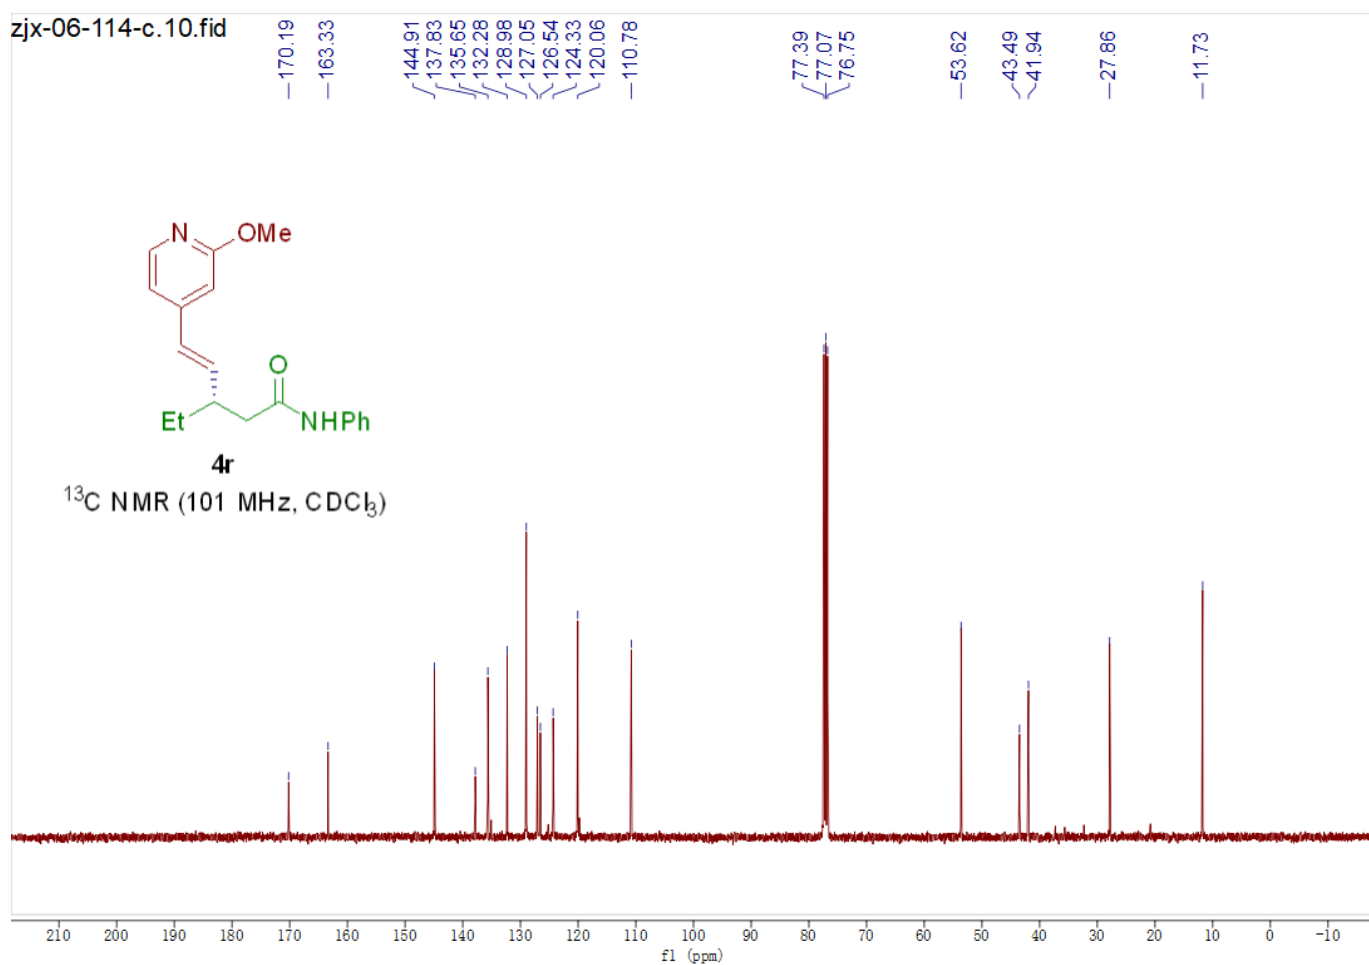



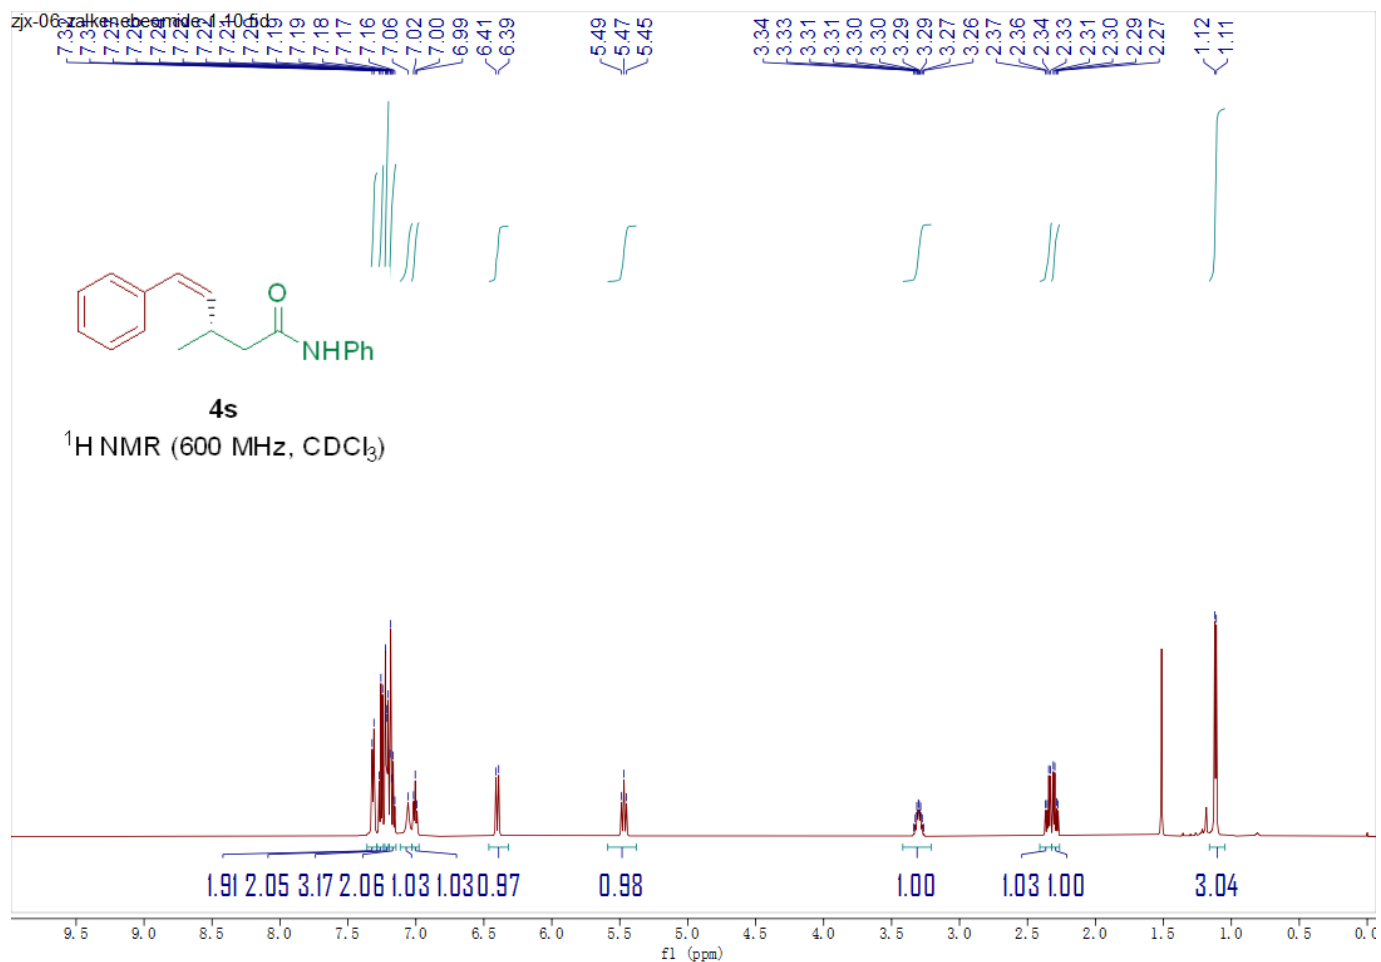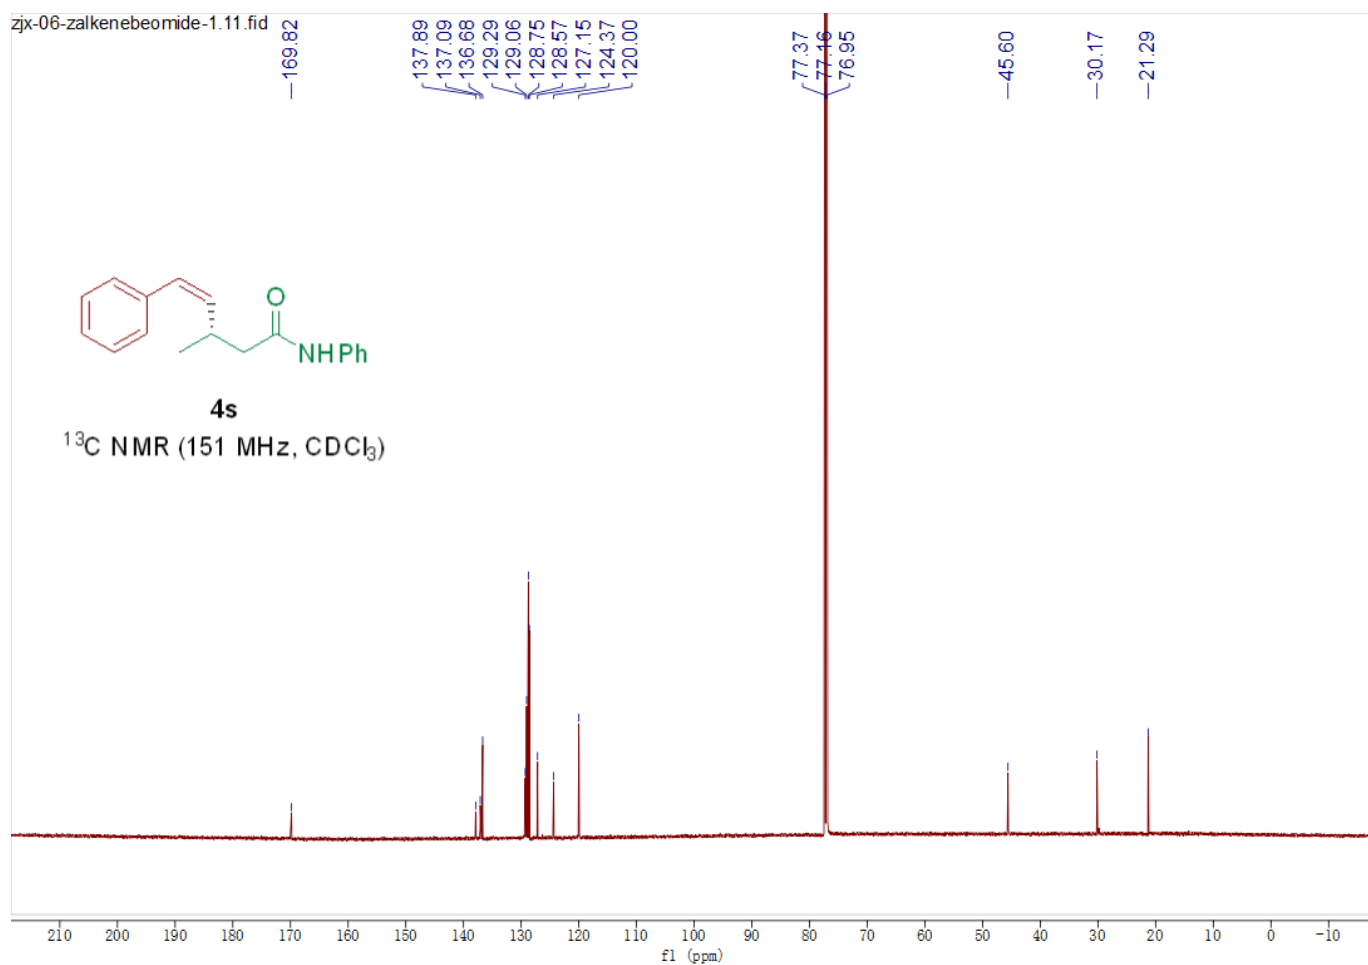

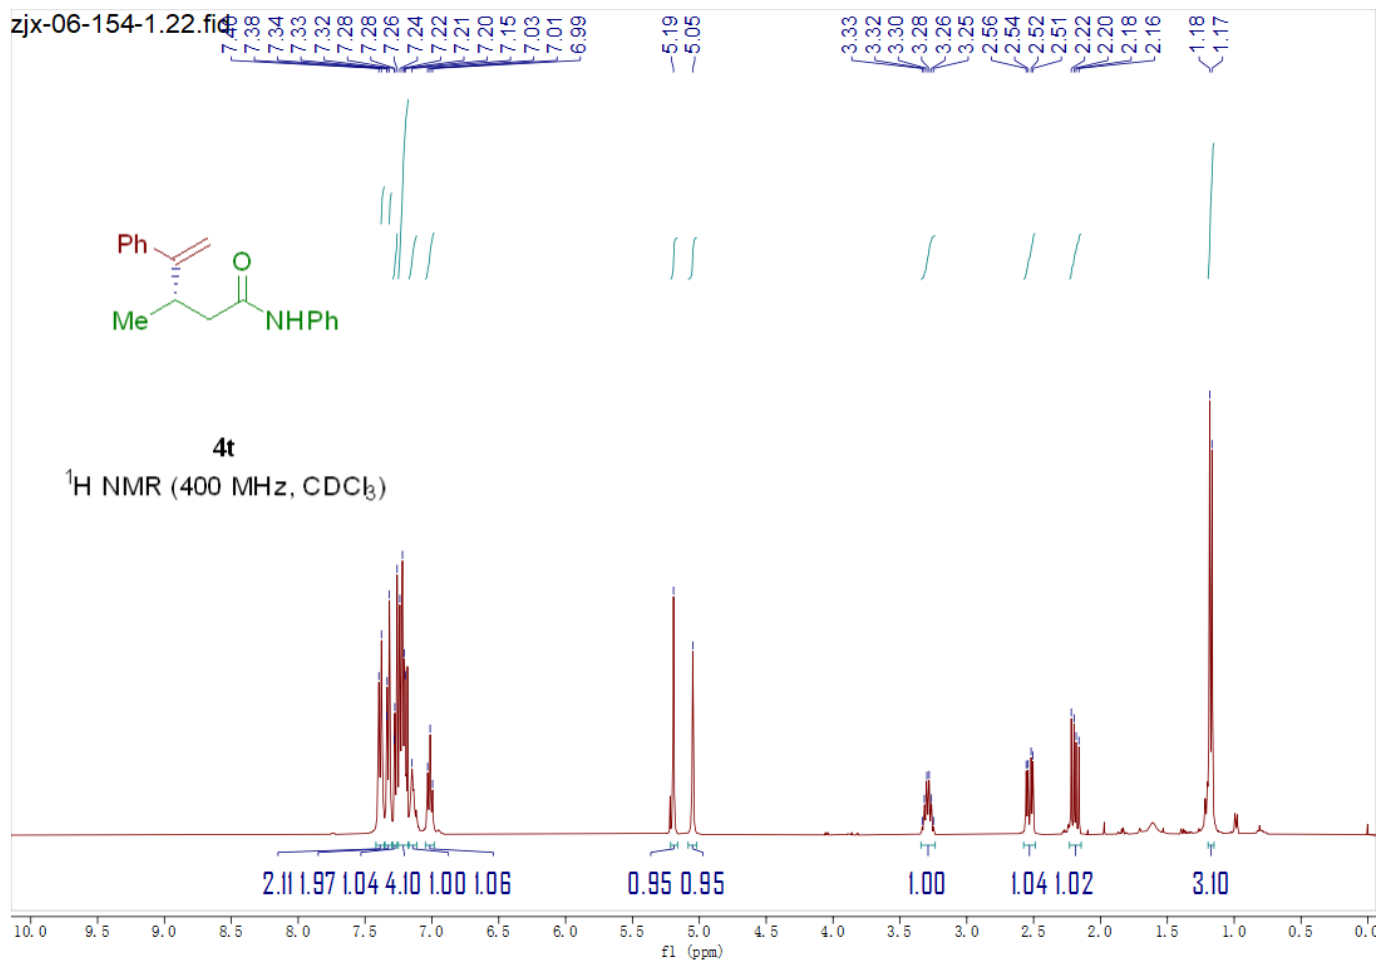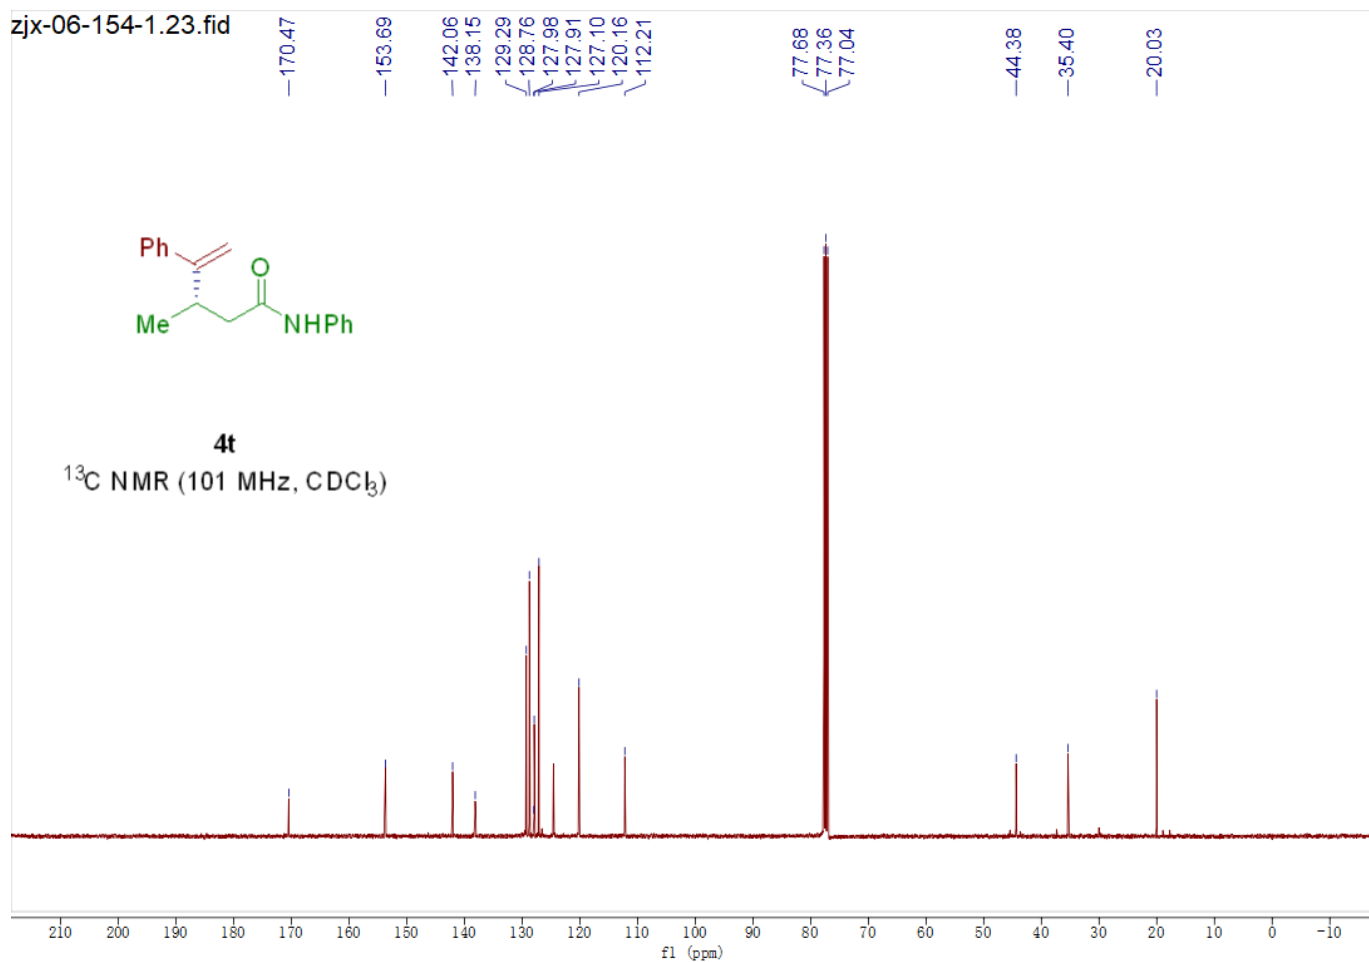

zjx-06-135-1.10.fid

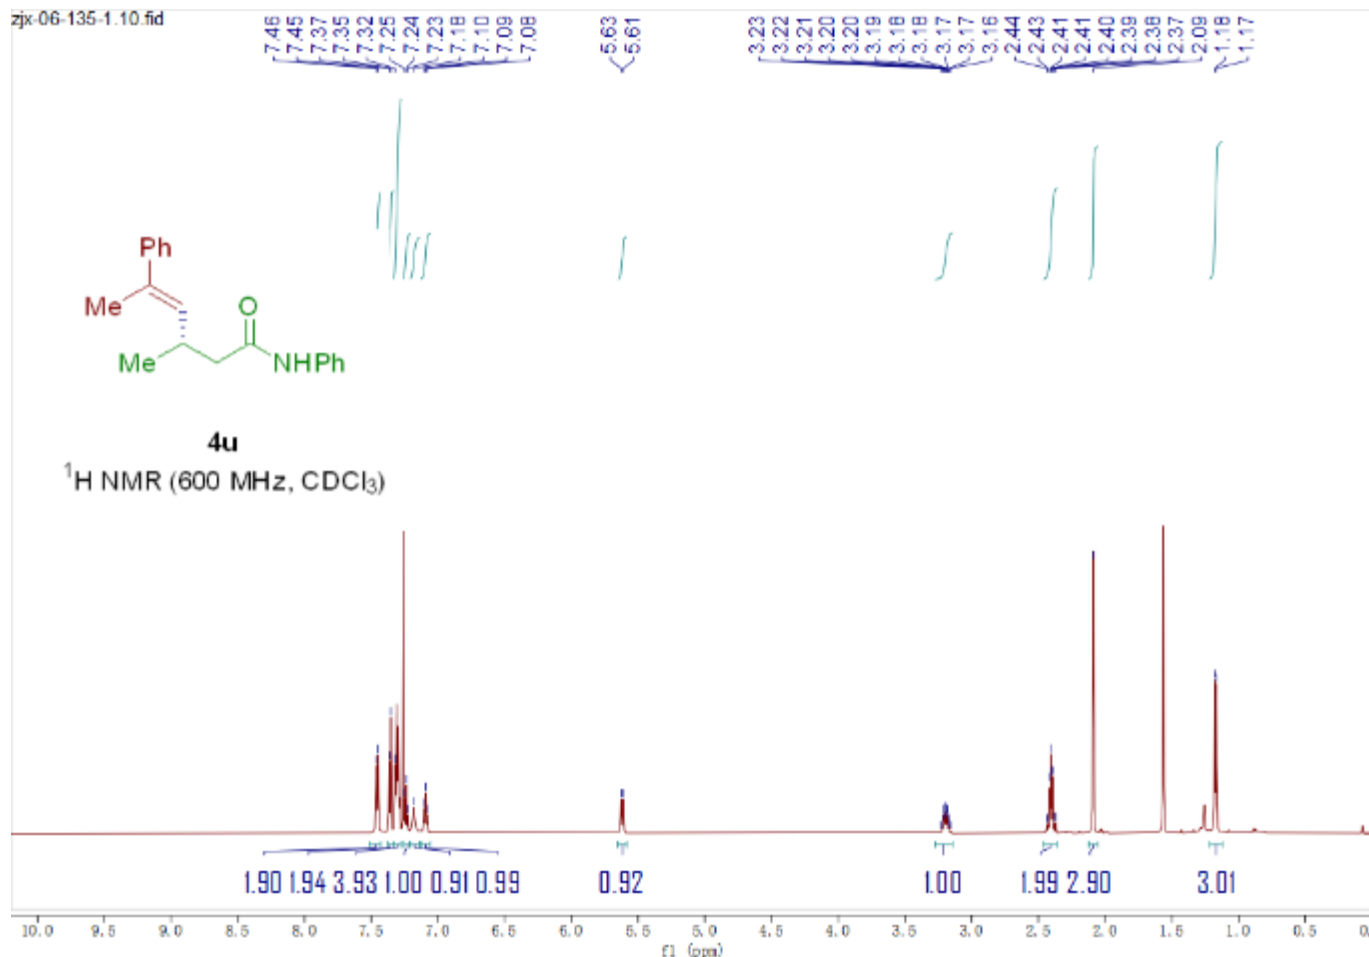

zjx-06-150-1-c.11.fid

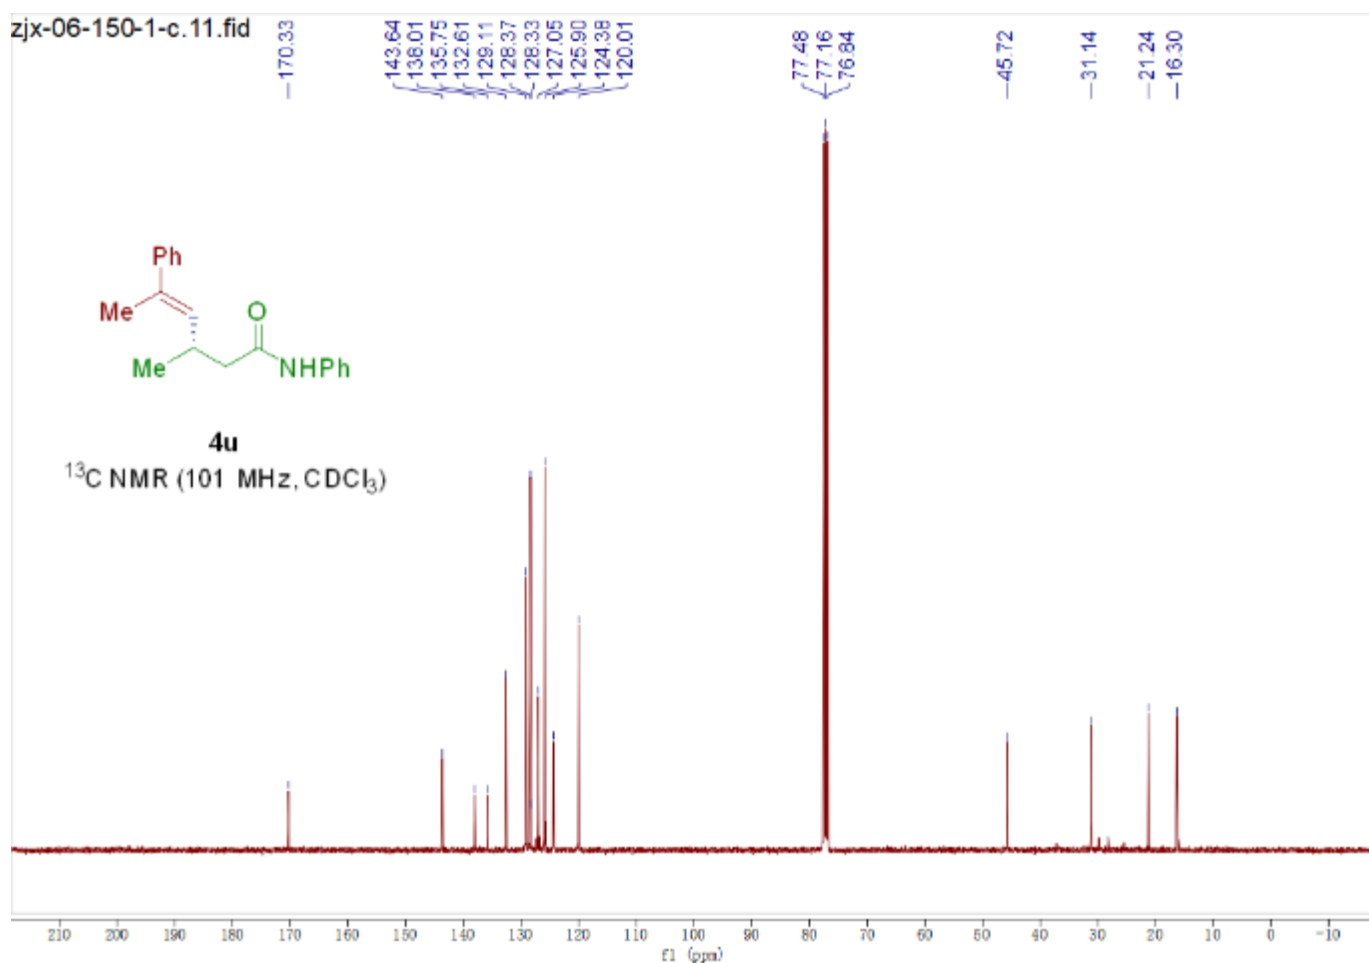

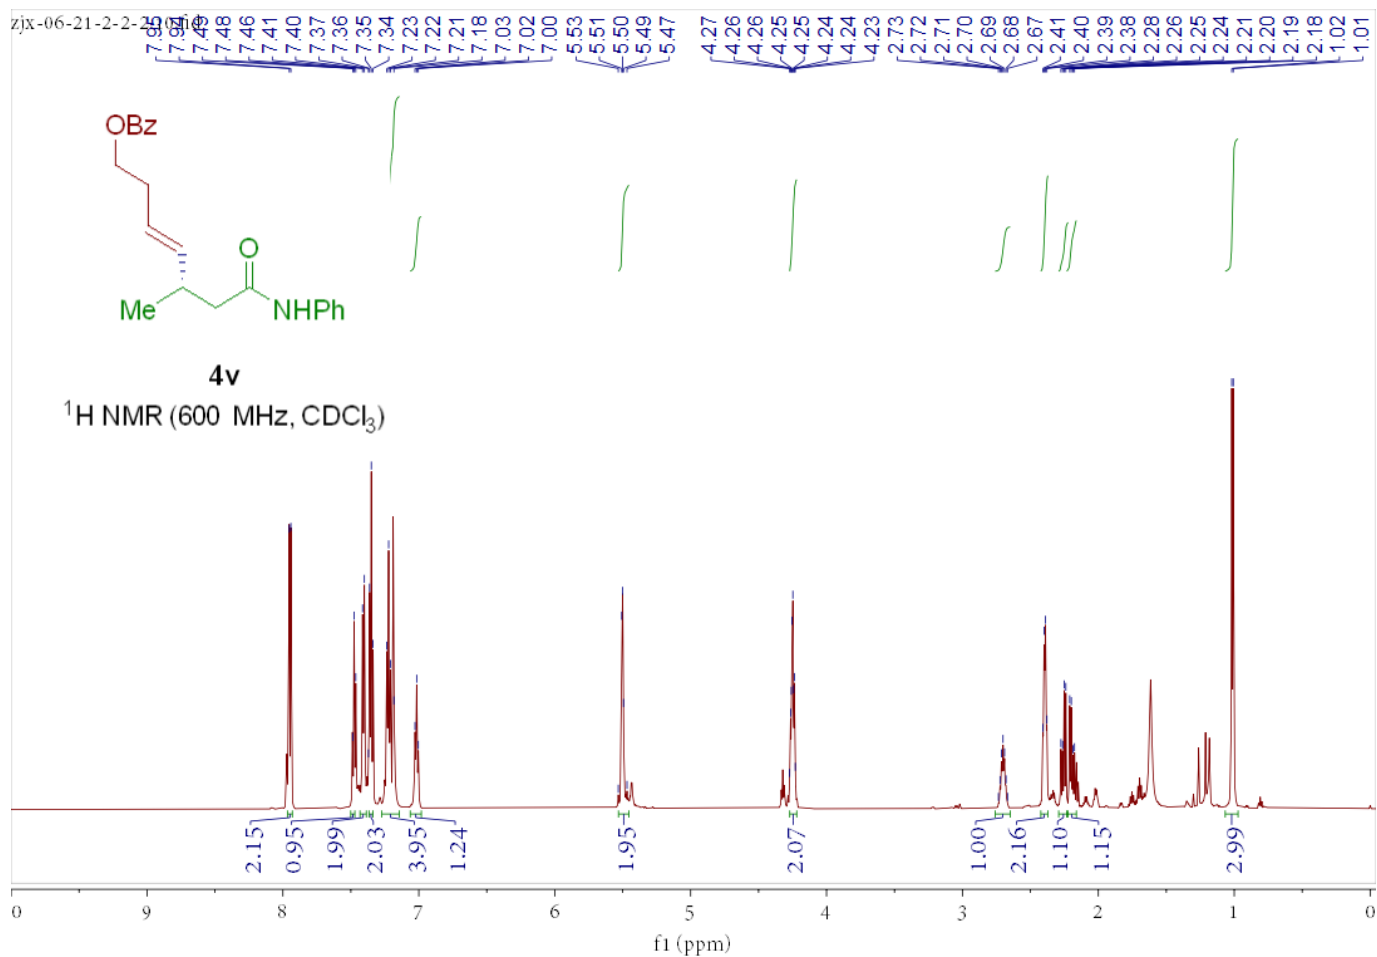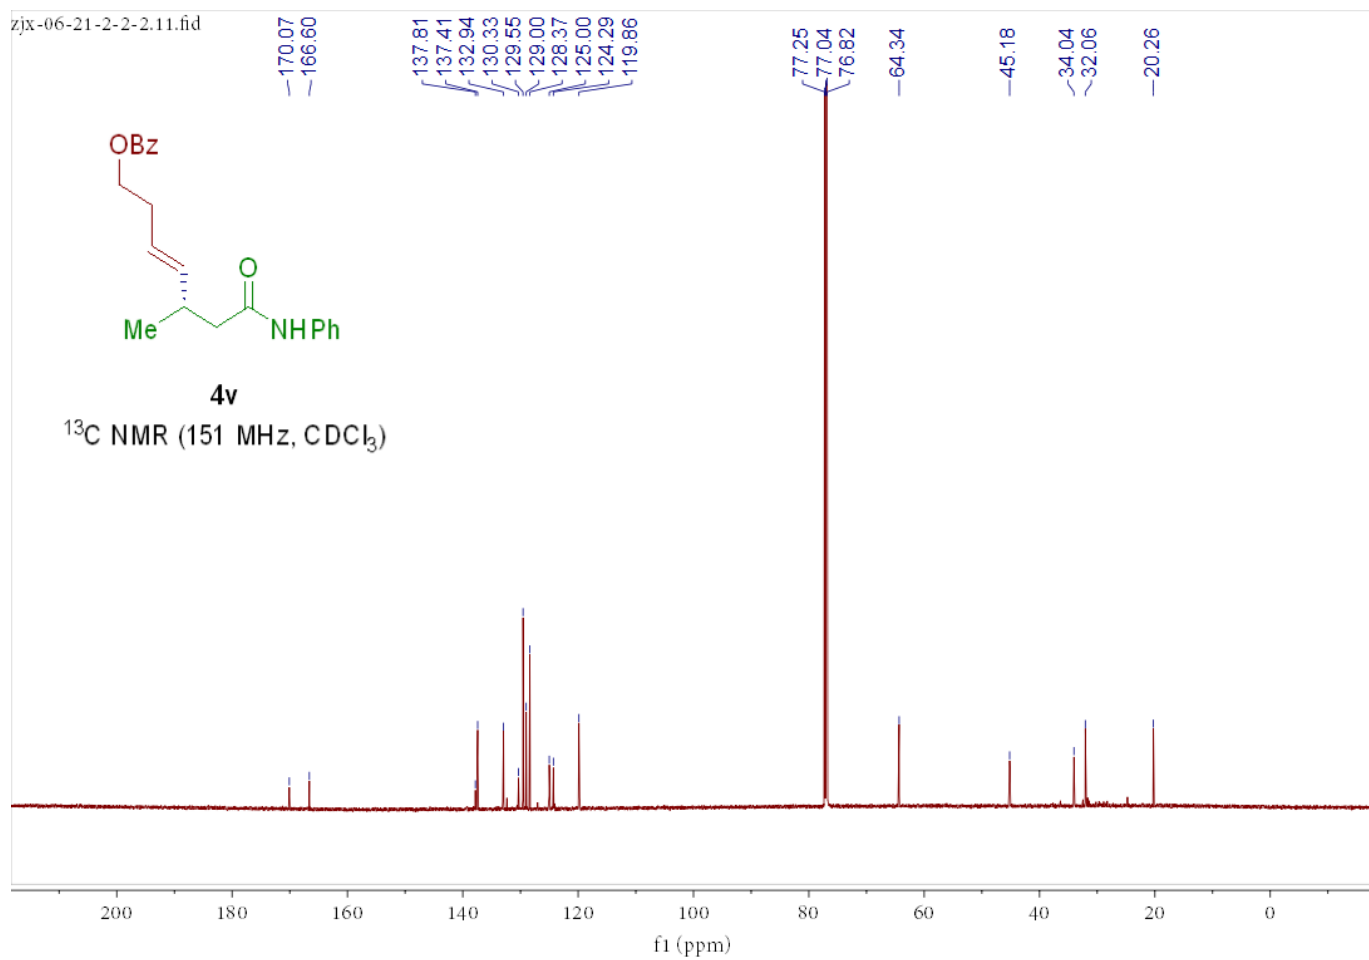

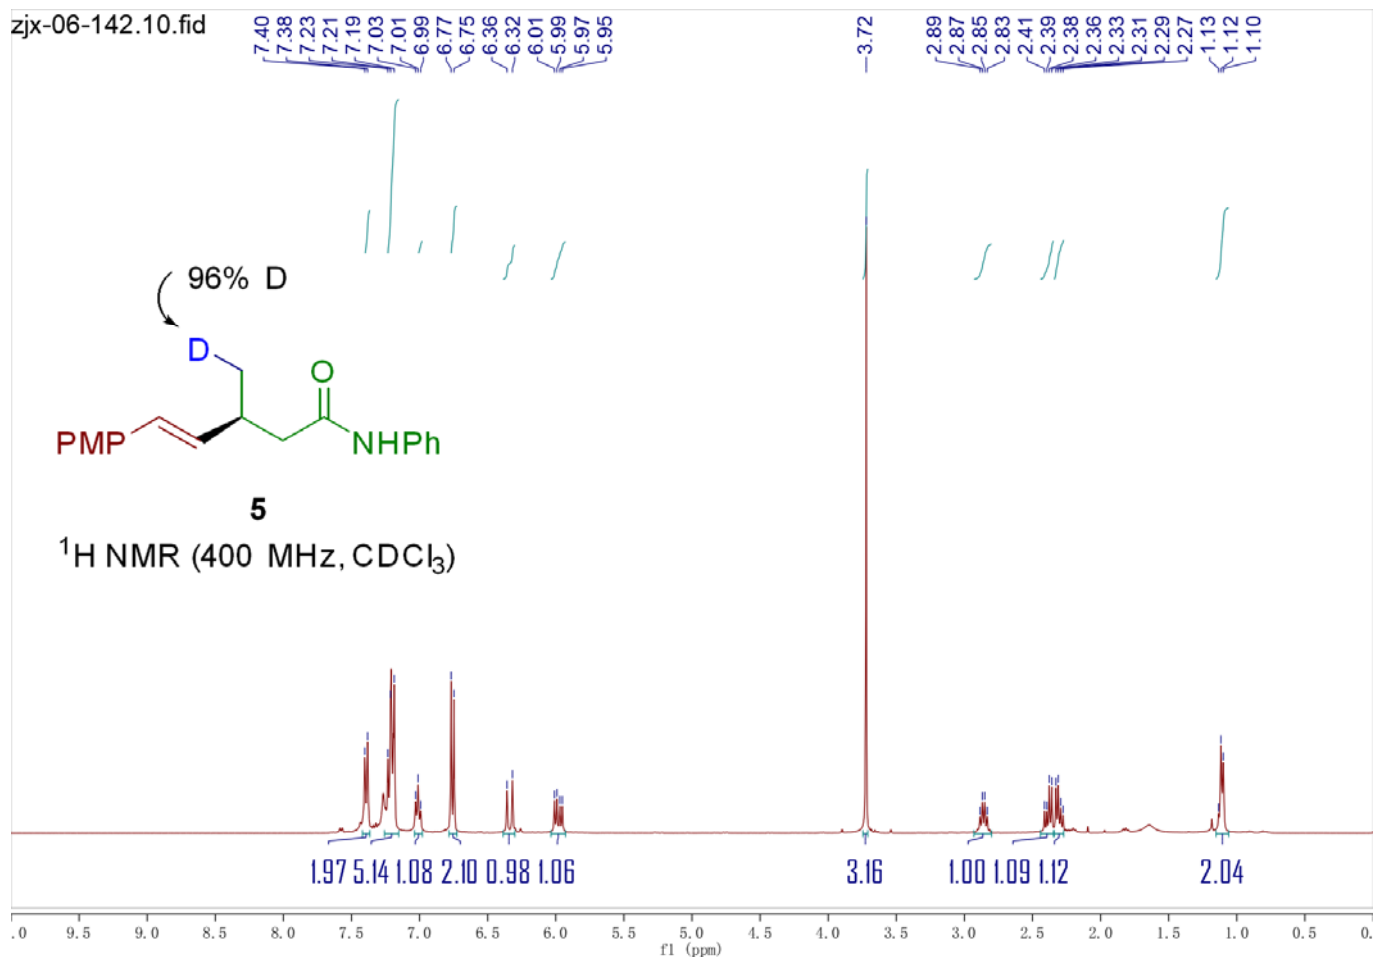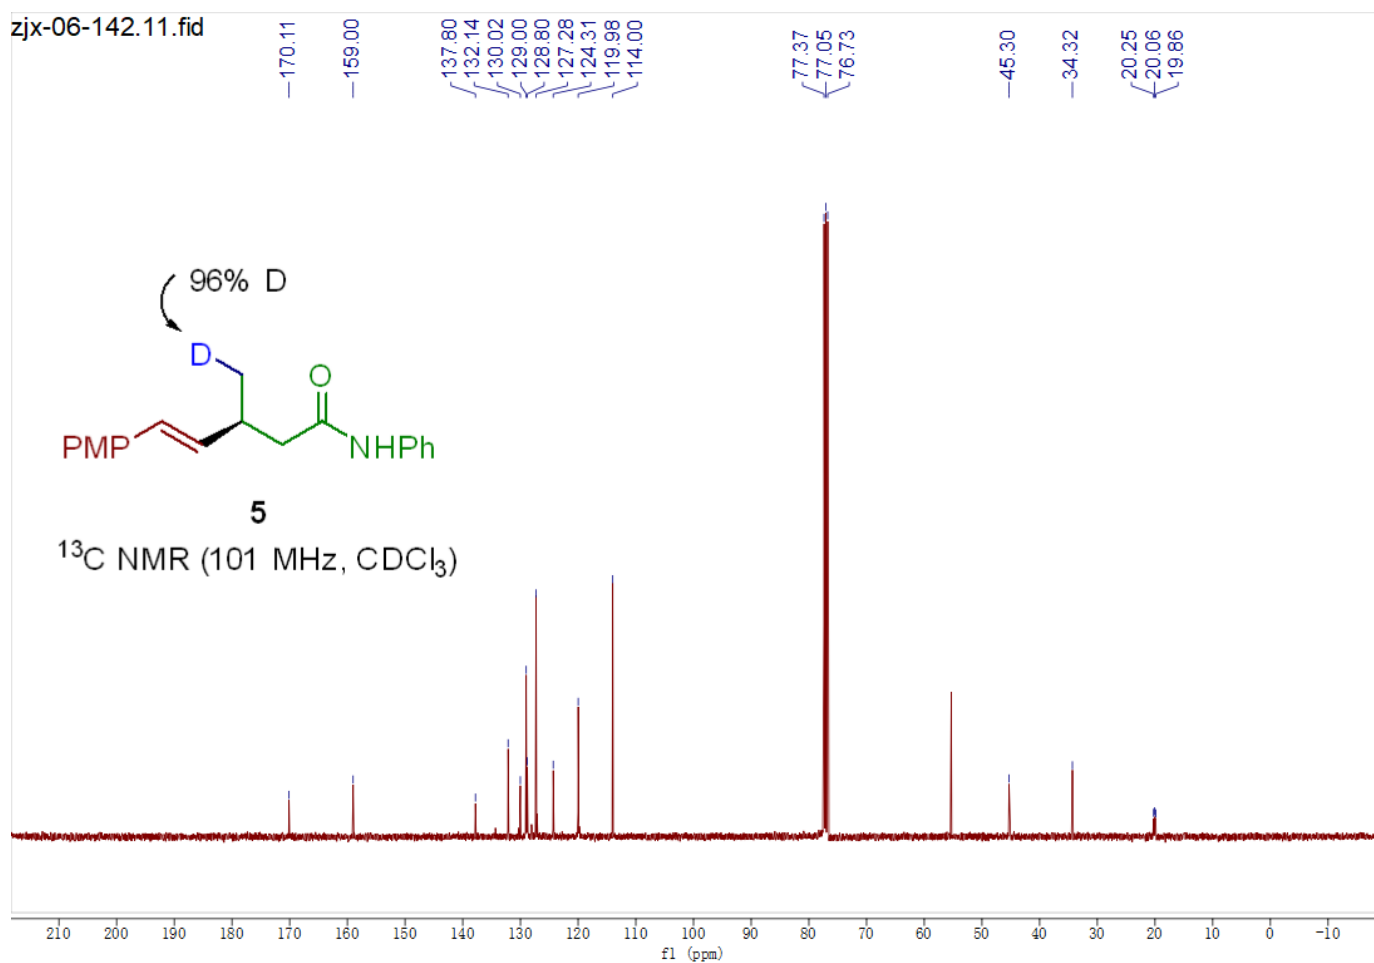

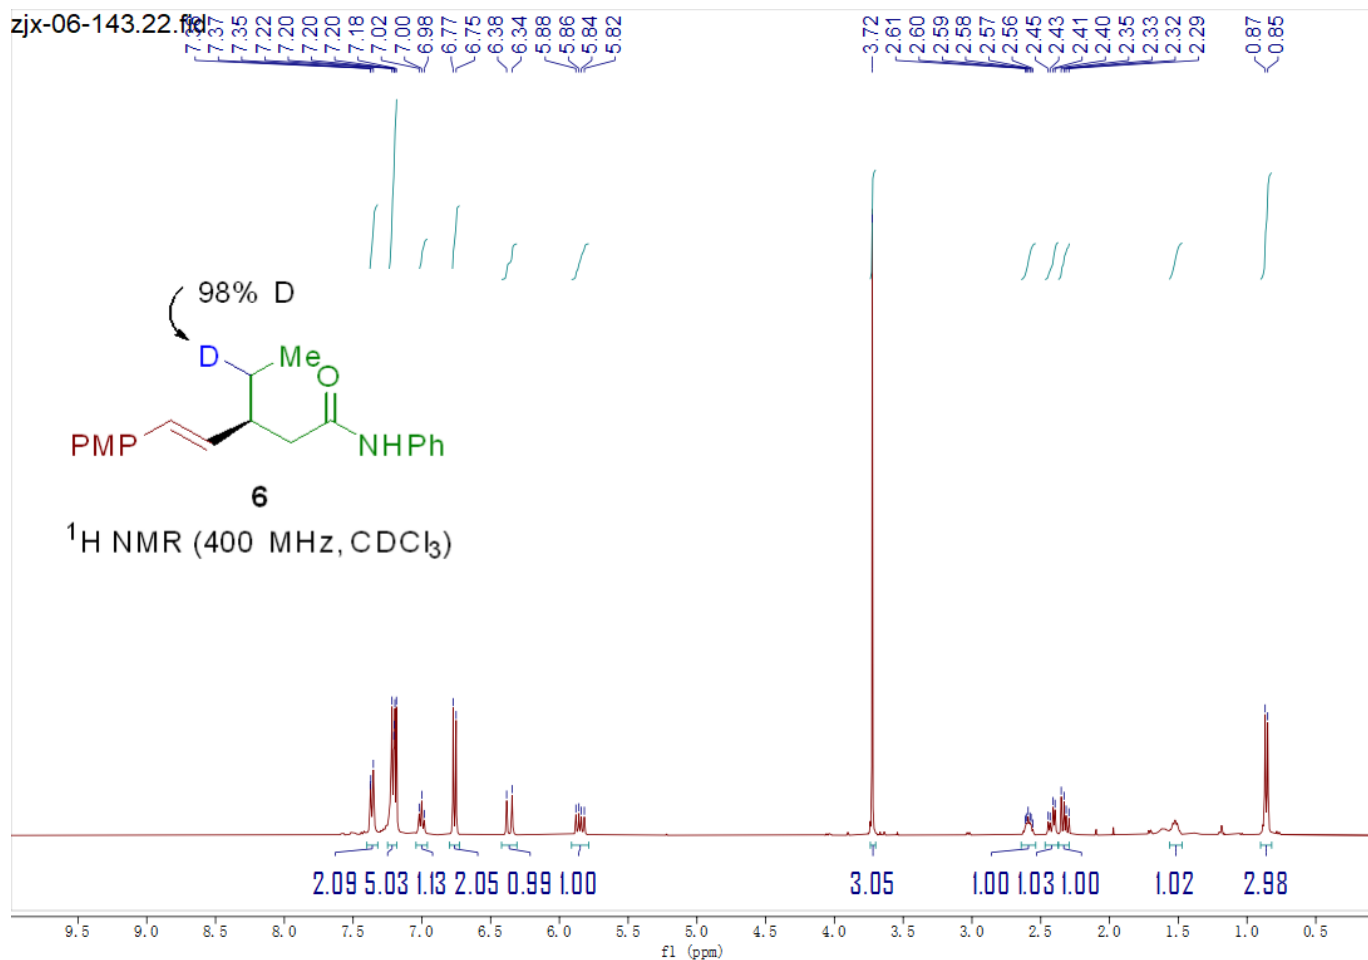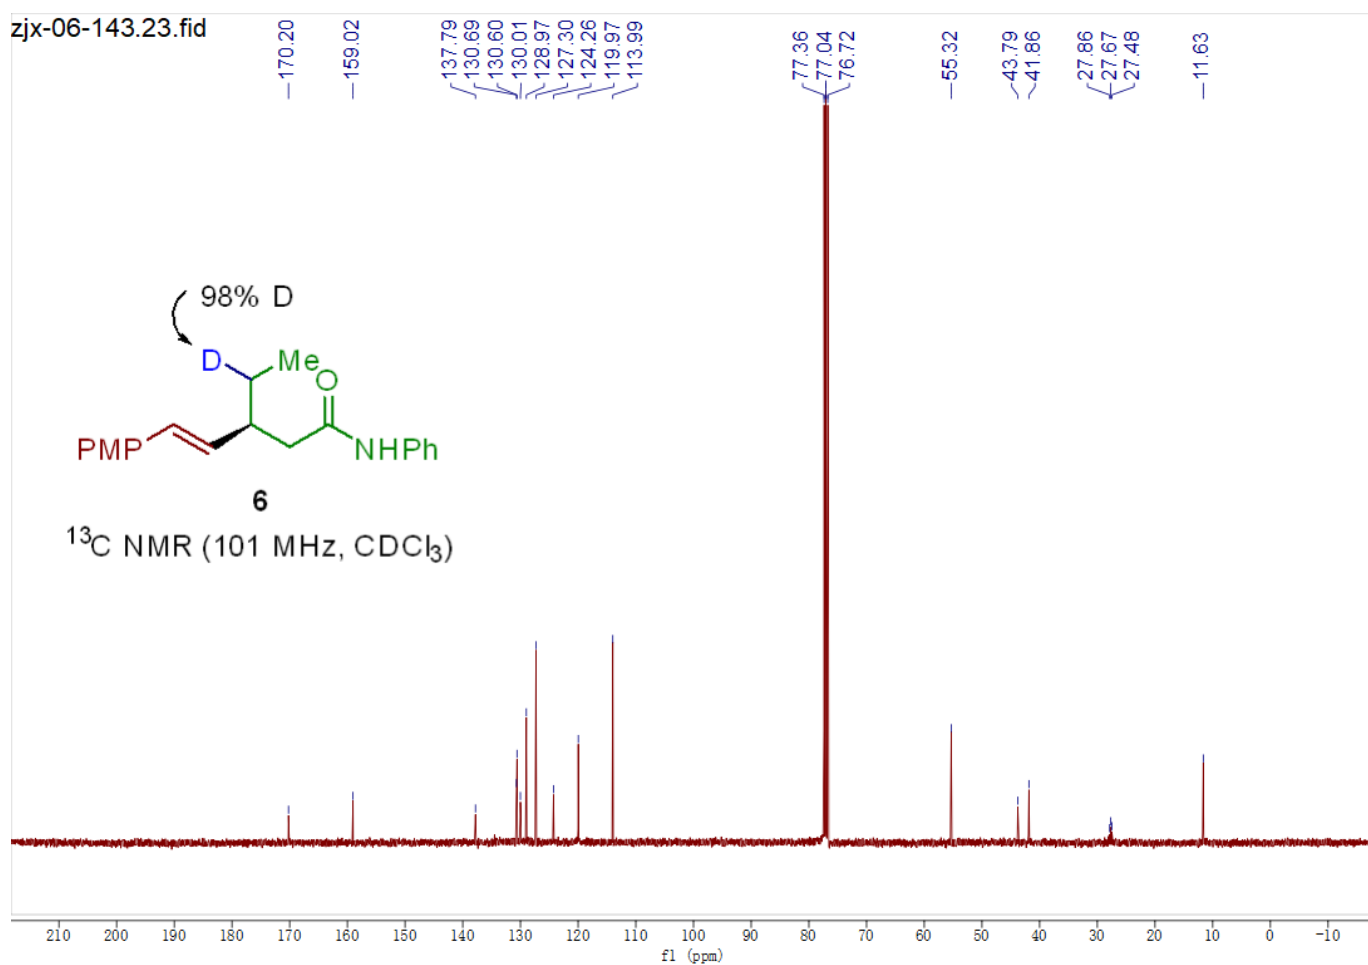

zjx-06-179-2-1.10.fid

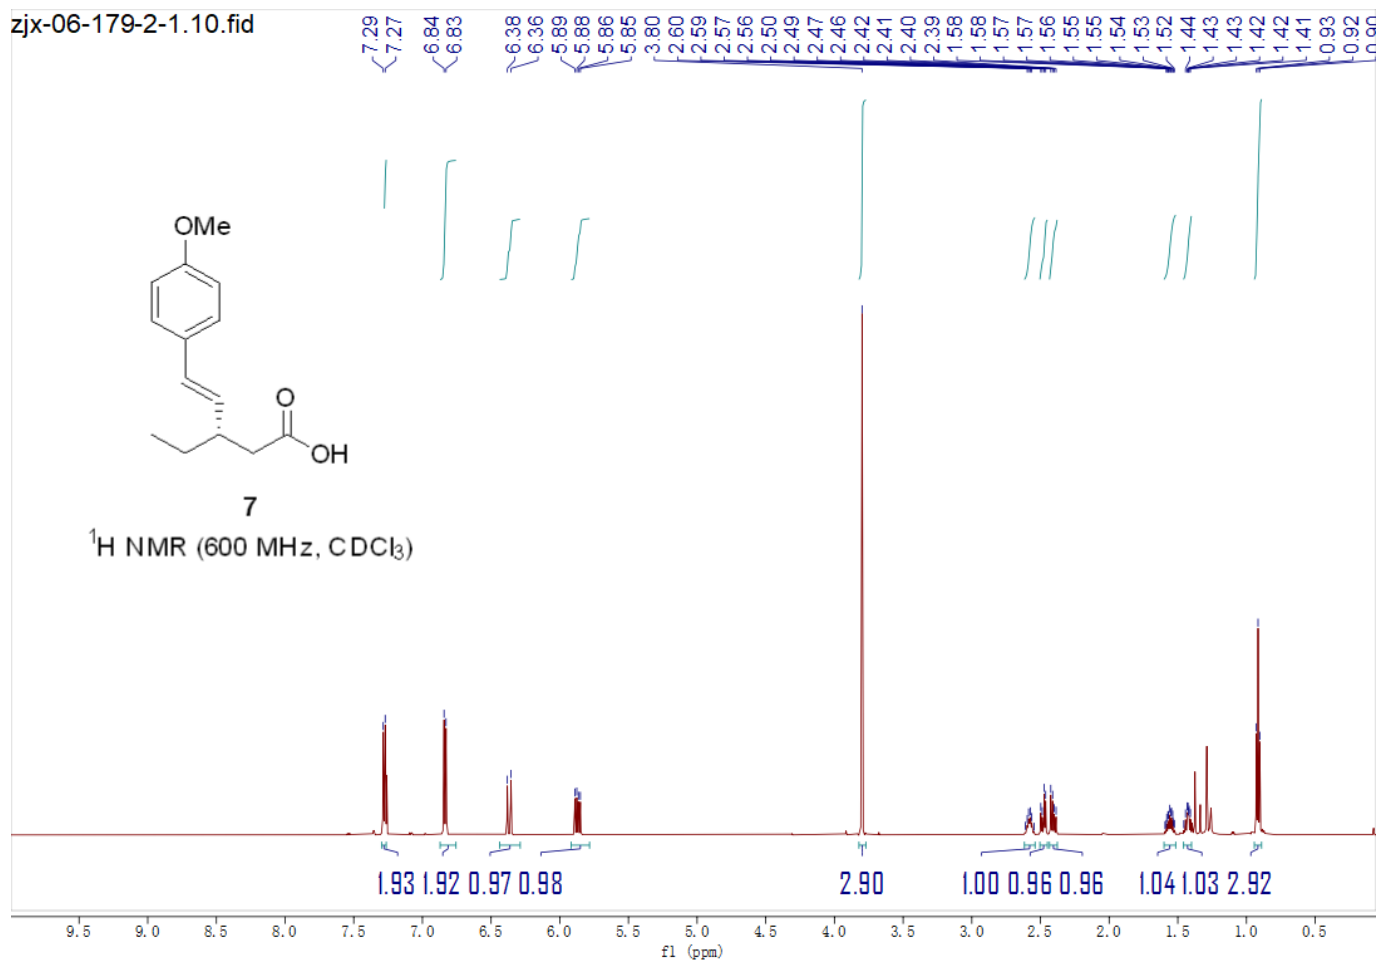

zjx-06-179-2-1.11.fid

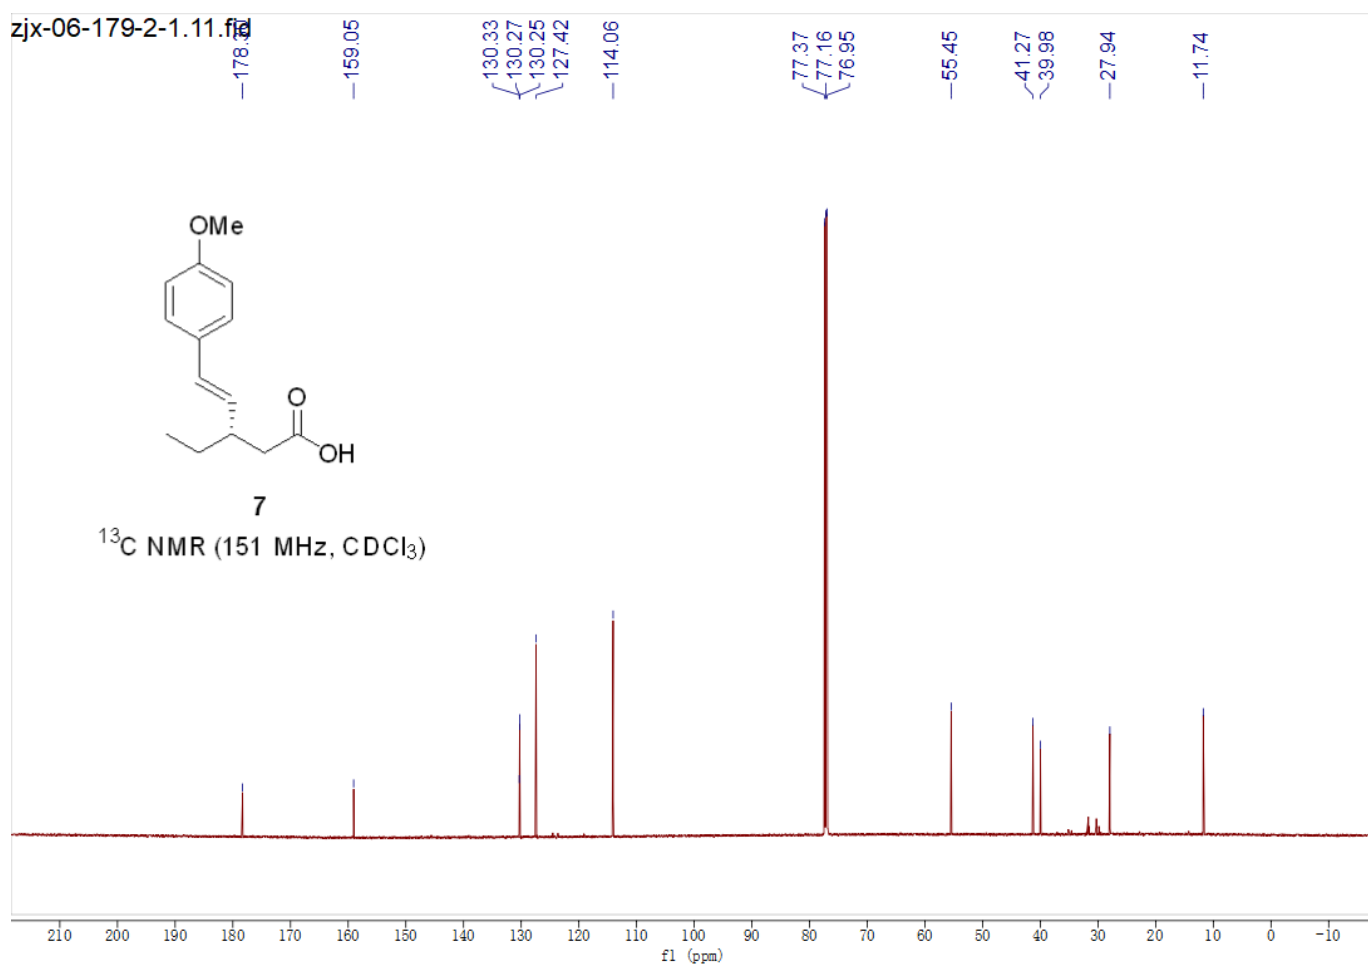

zjx-06-ketone.7.fid

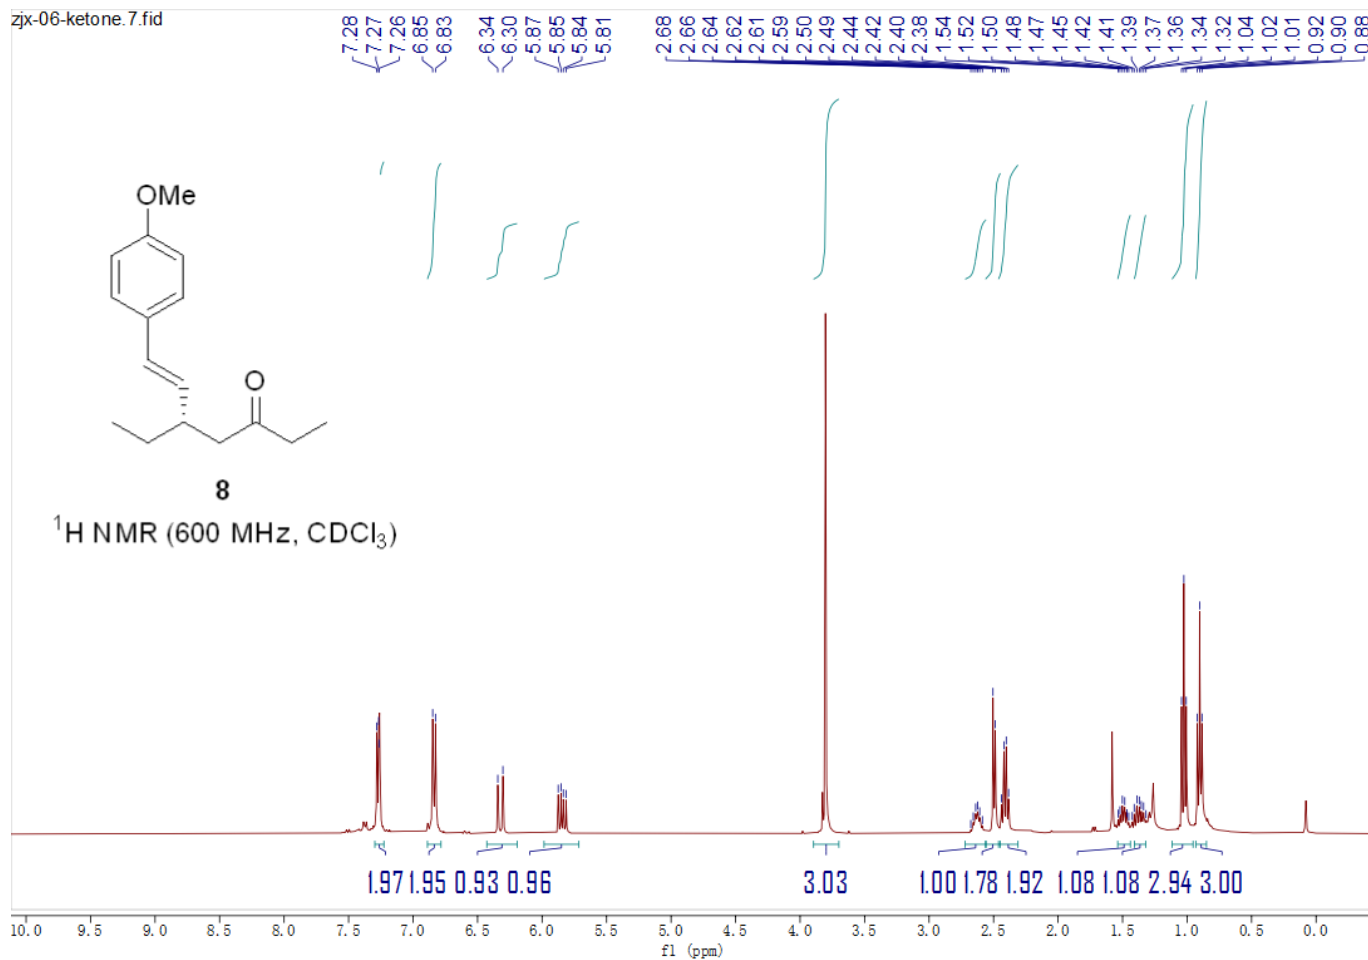

zjx-06-ketone-c.10.fid

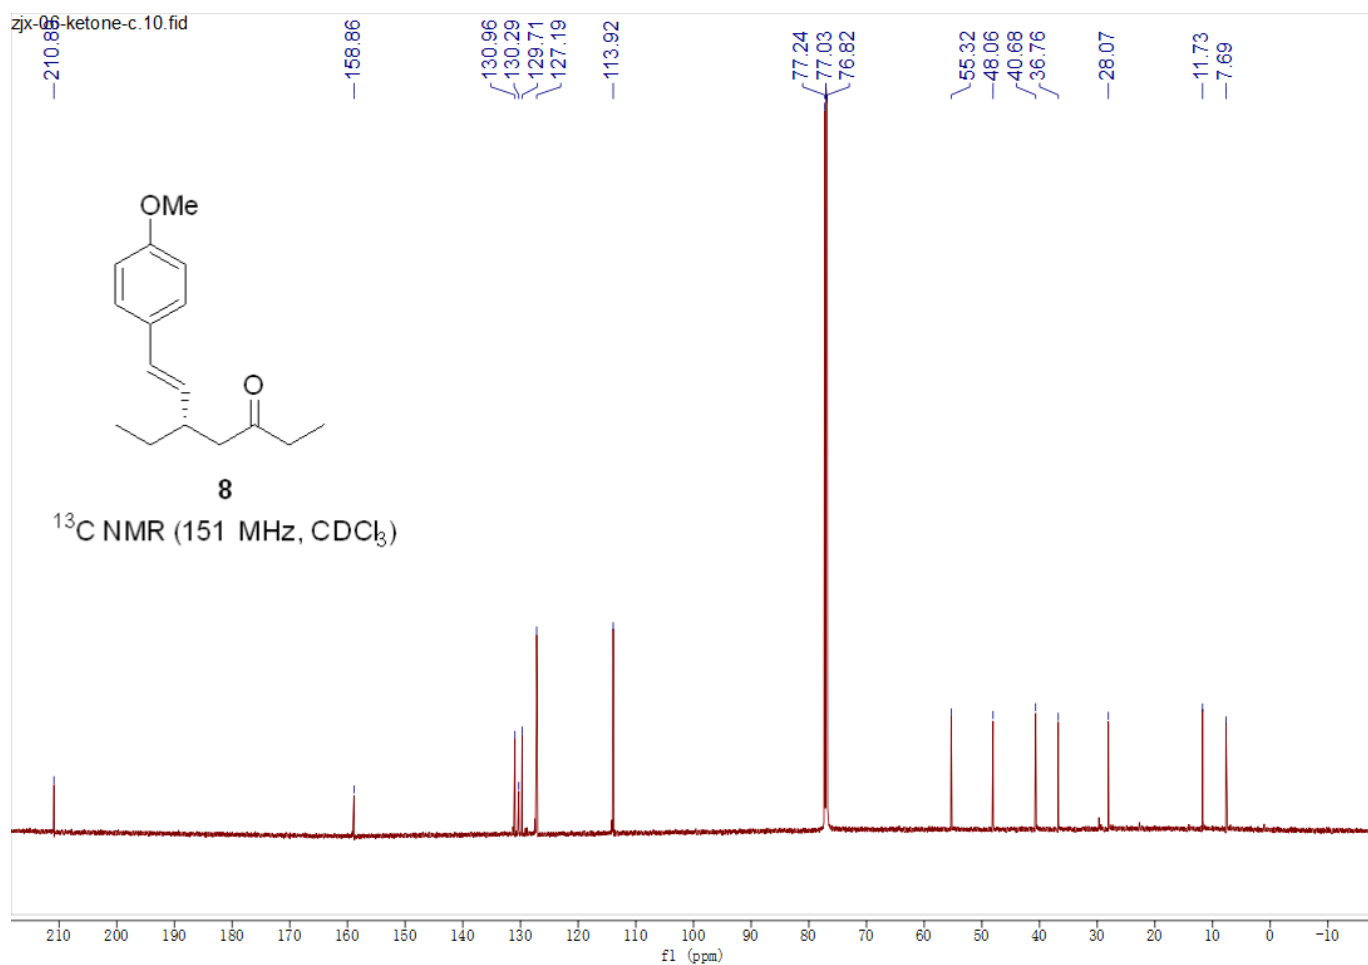



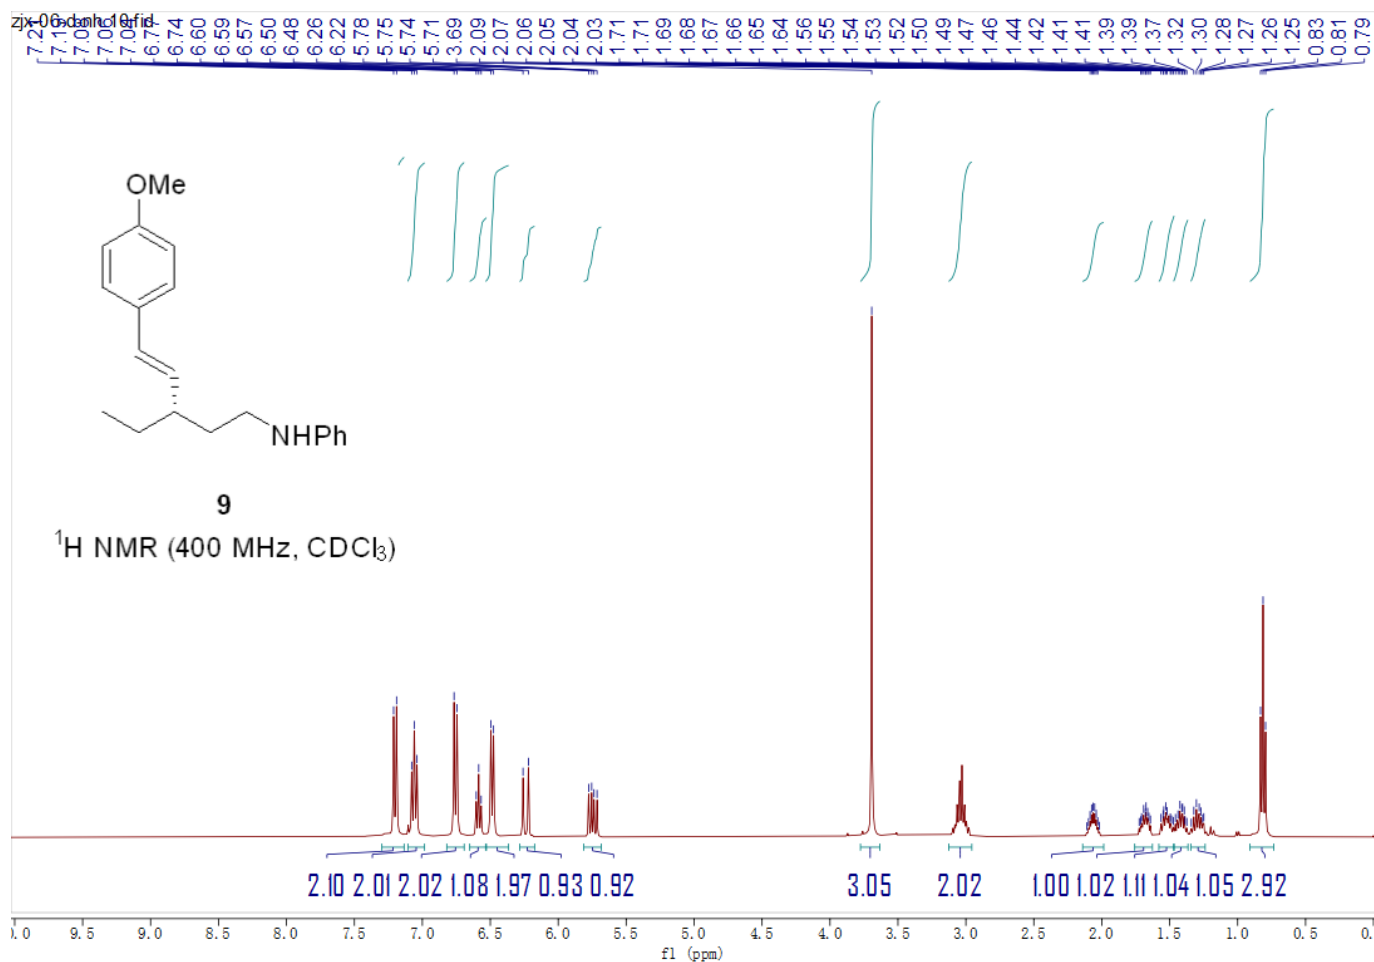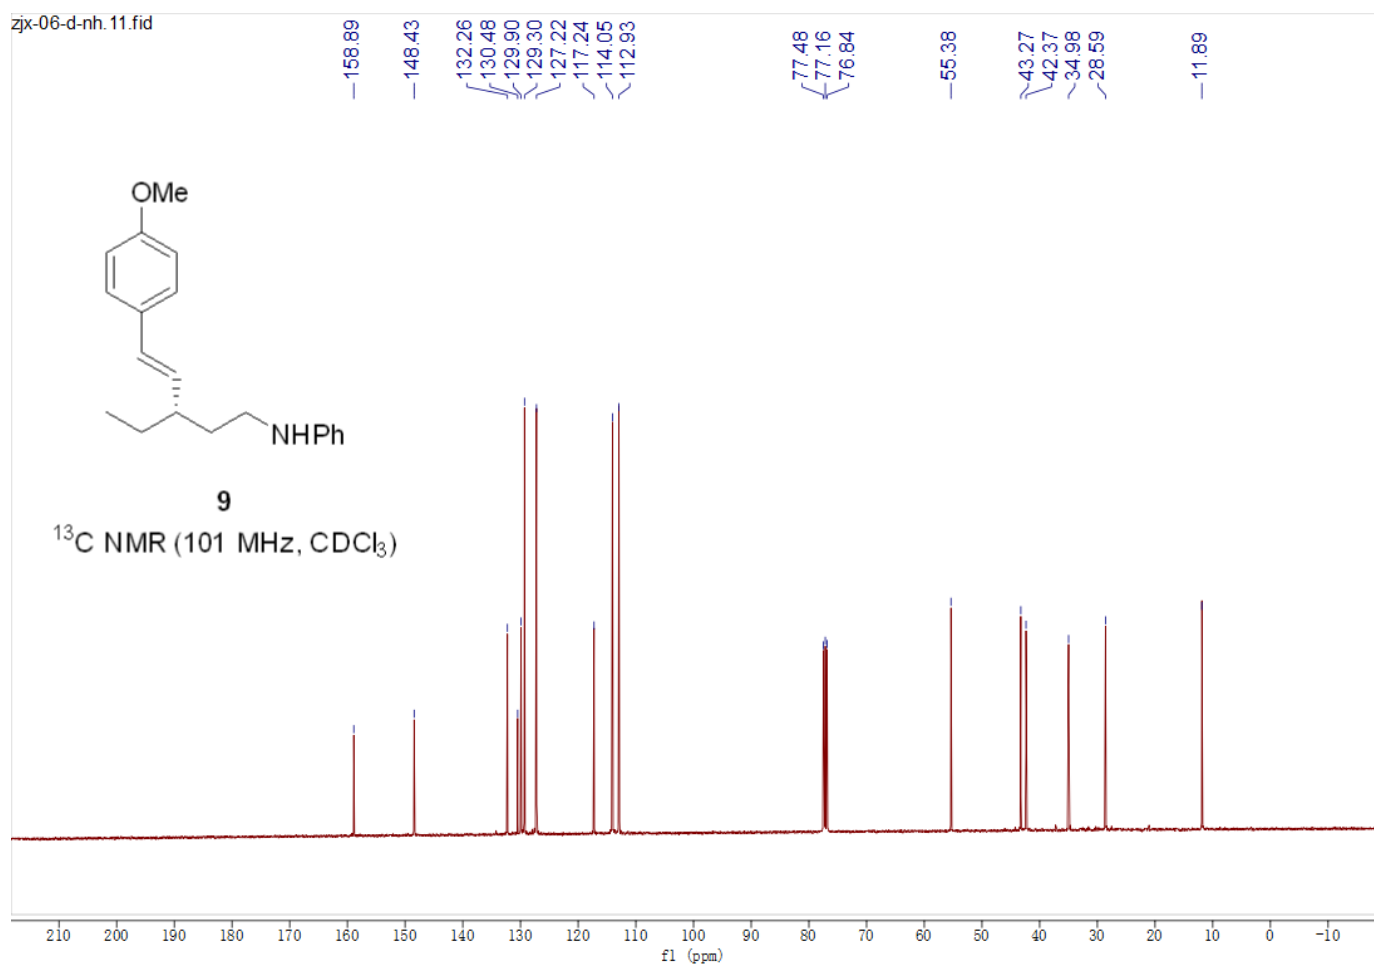

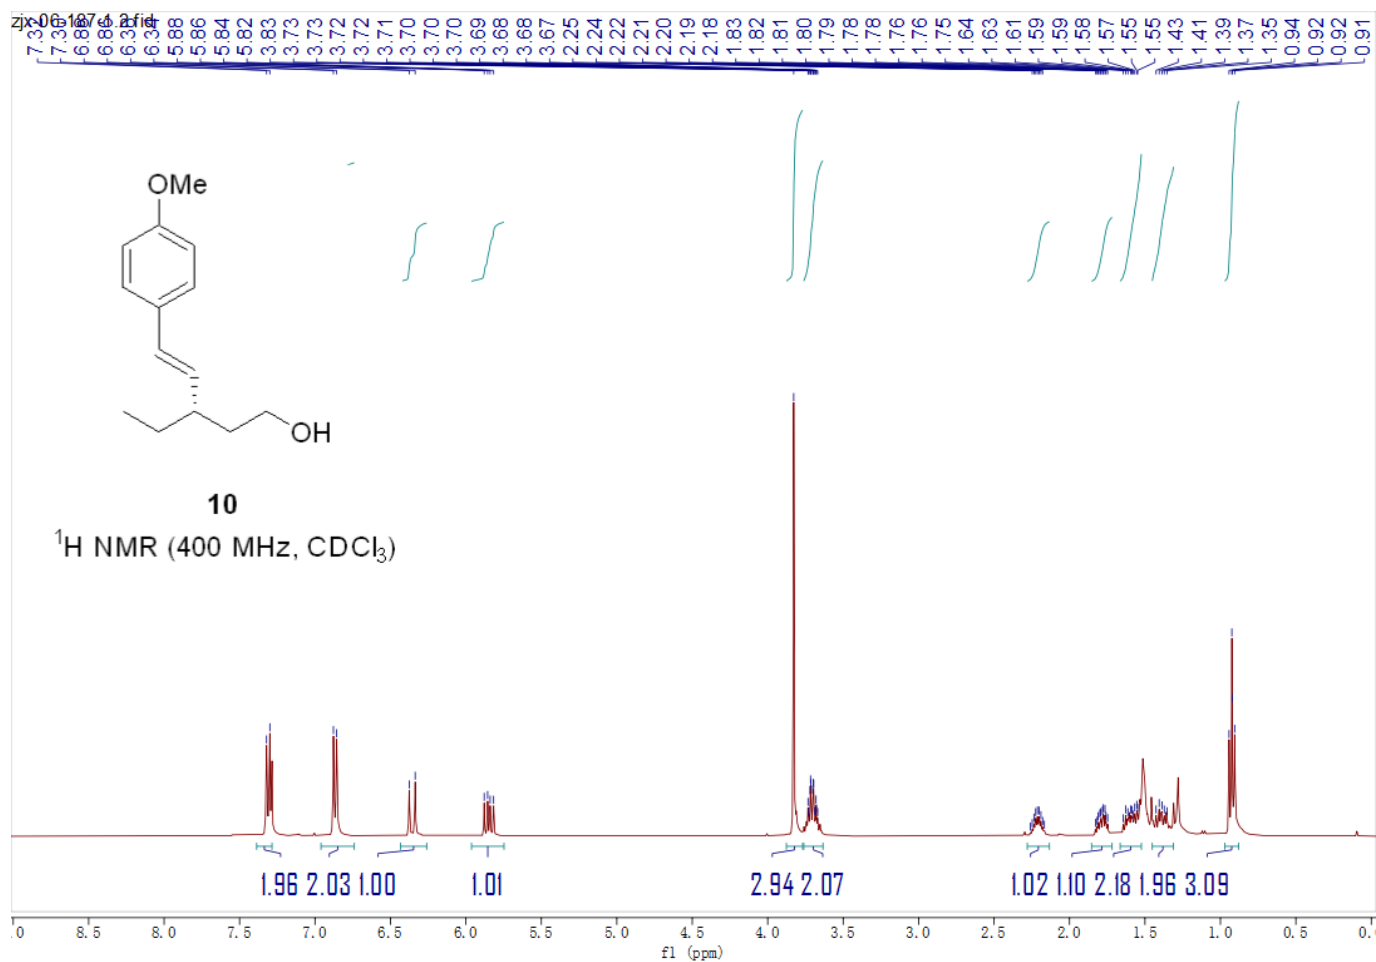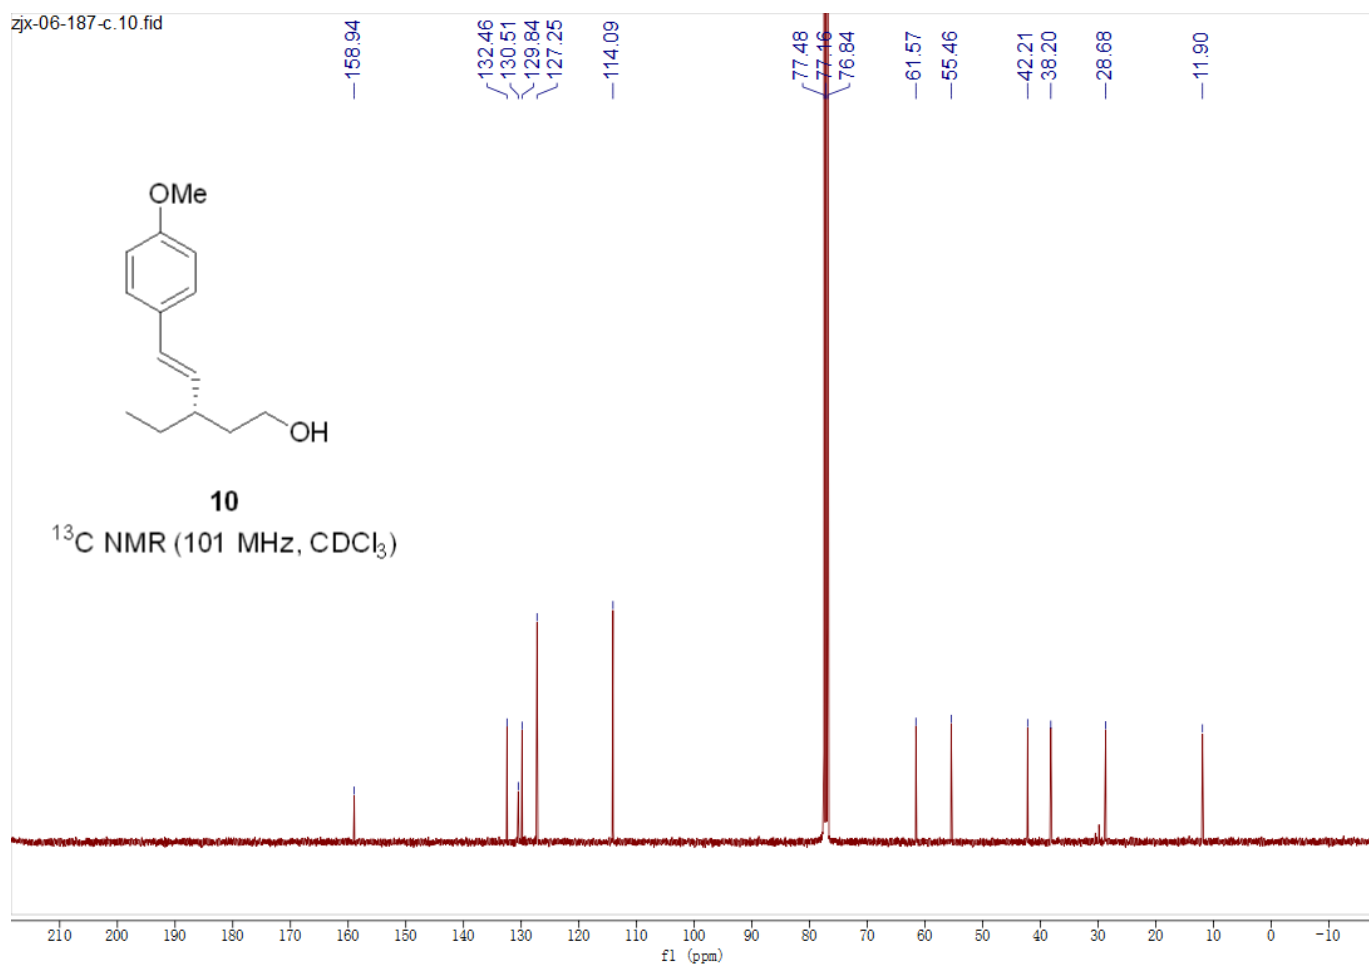

zjx-06-185-cdcn.22.fid

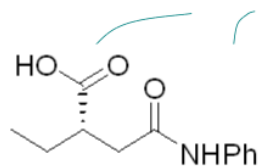

**11**

$^1\text{H}$  NMR (400 MHz,  $\text{CD}_3\text{CN}$ )

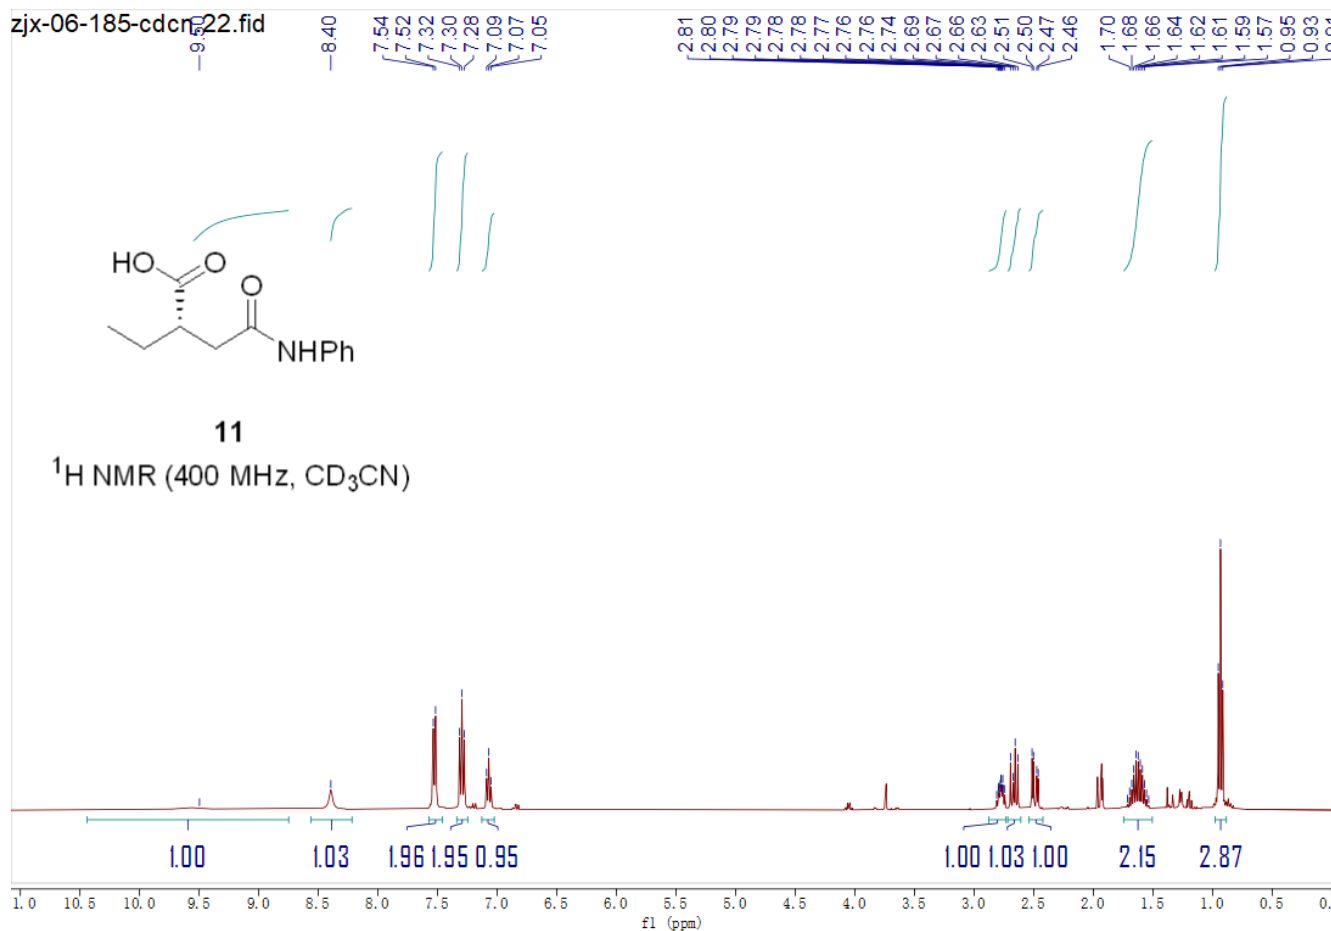

zjx-06-187-cdcn.23.fid

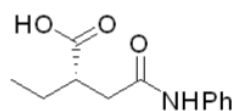

**11**

$^{13}\text{C}$  NMR (101 MHz,  $\text{CD}_3\text{CN}$ )

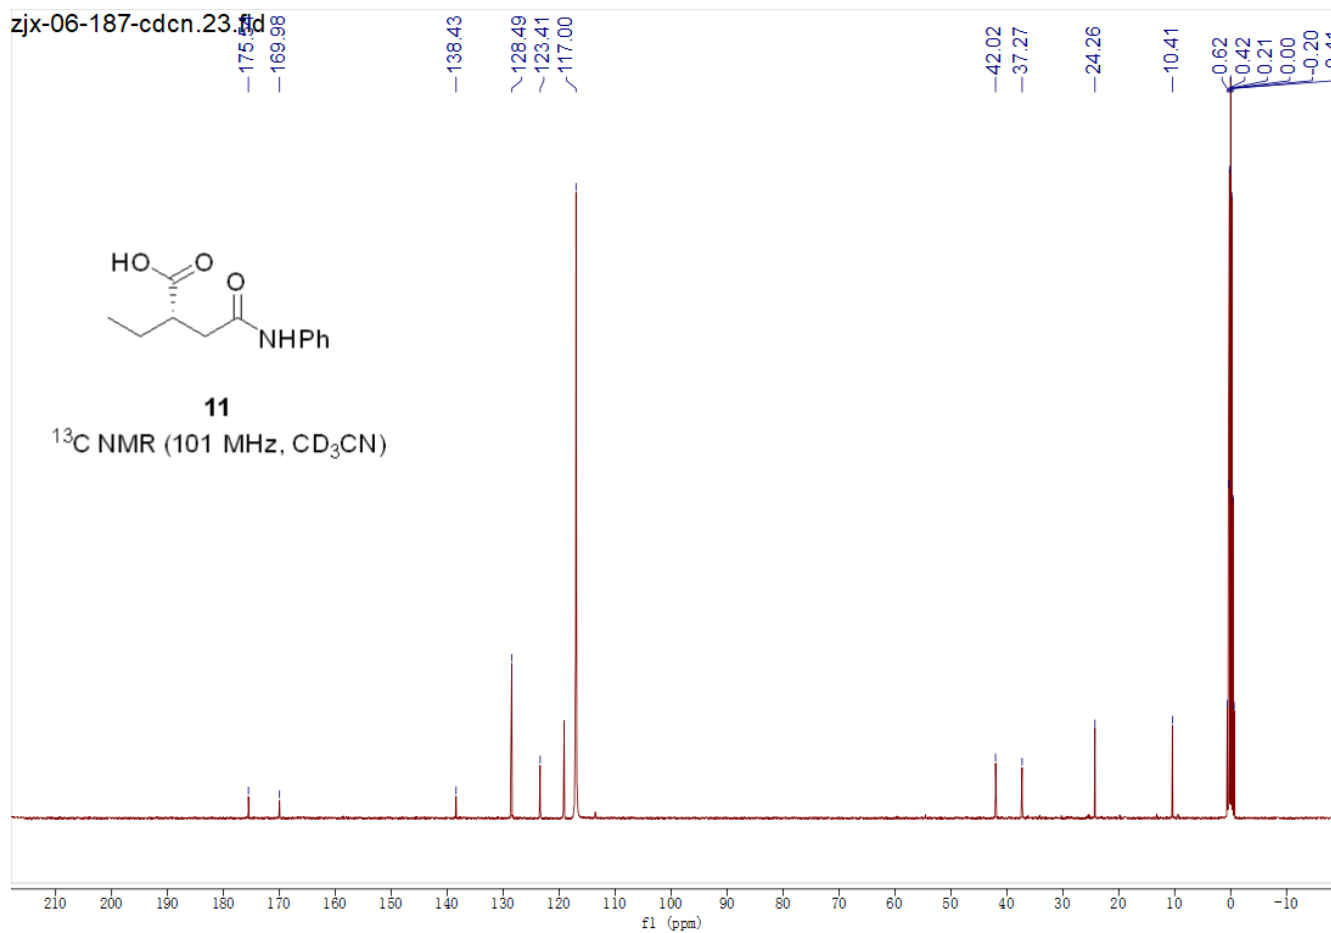

## XII.HPLC traces

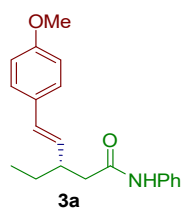

HPLC data using rac-L1

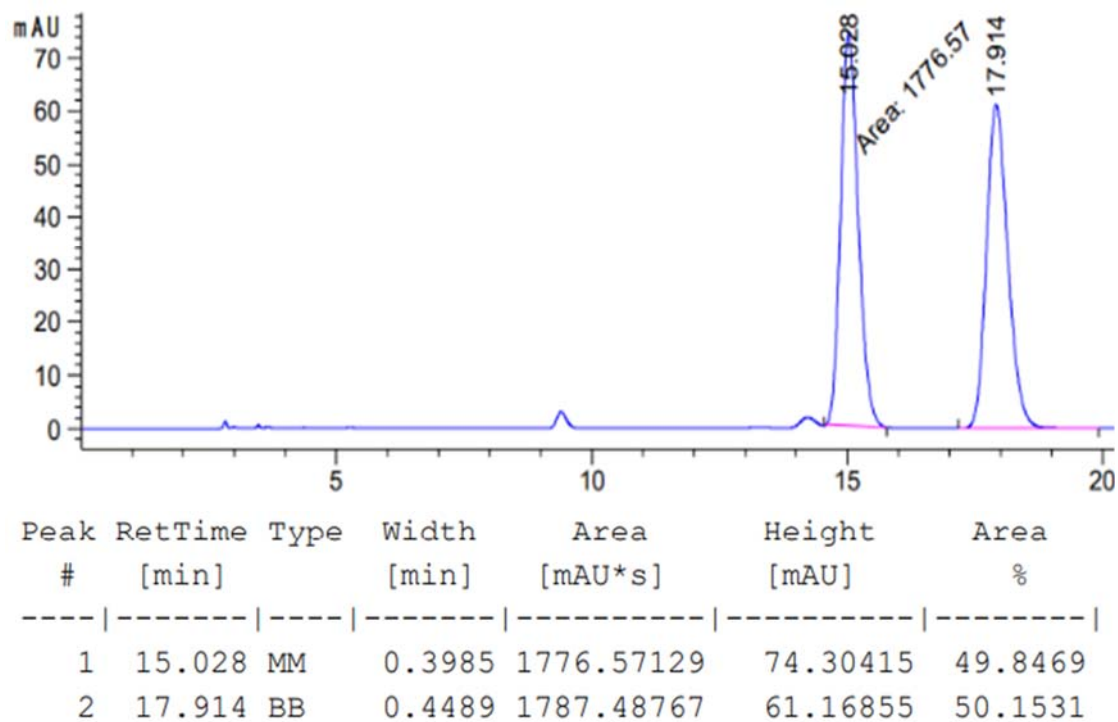

HPLC data using L1

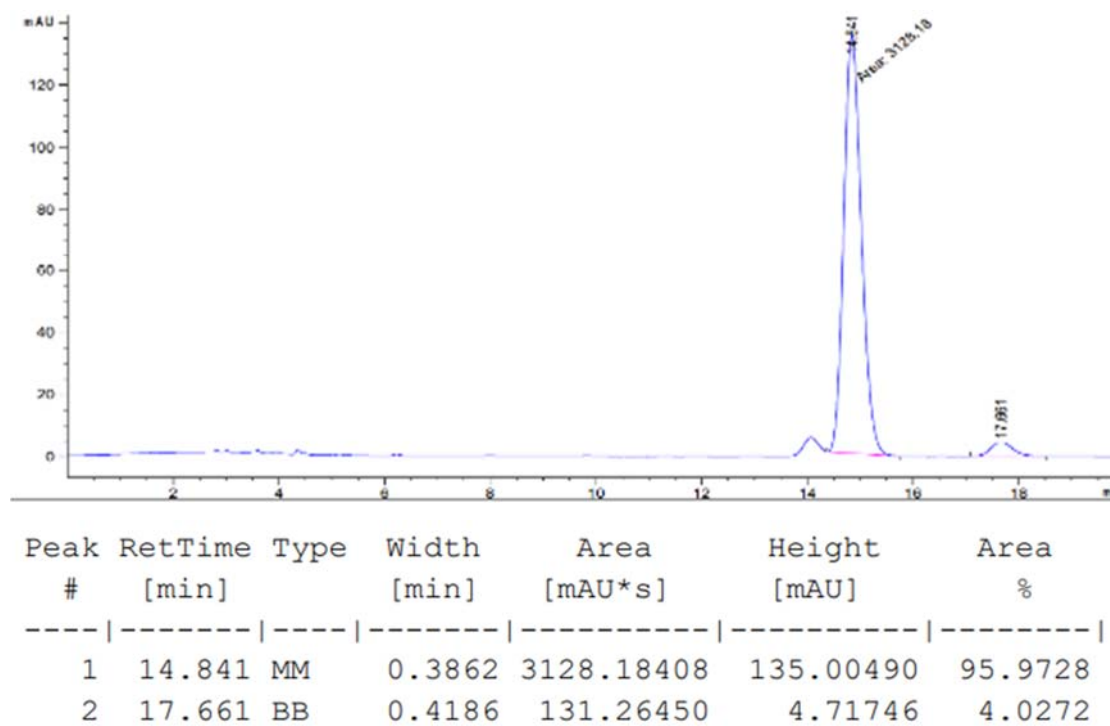

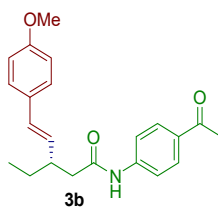

### HPLC data using rac-L1

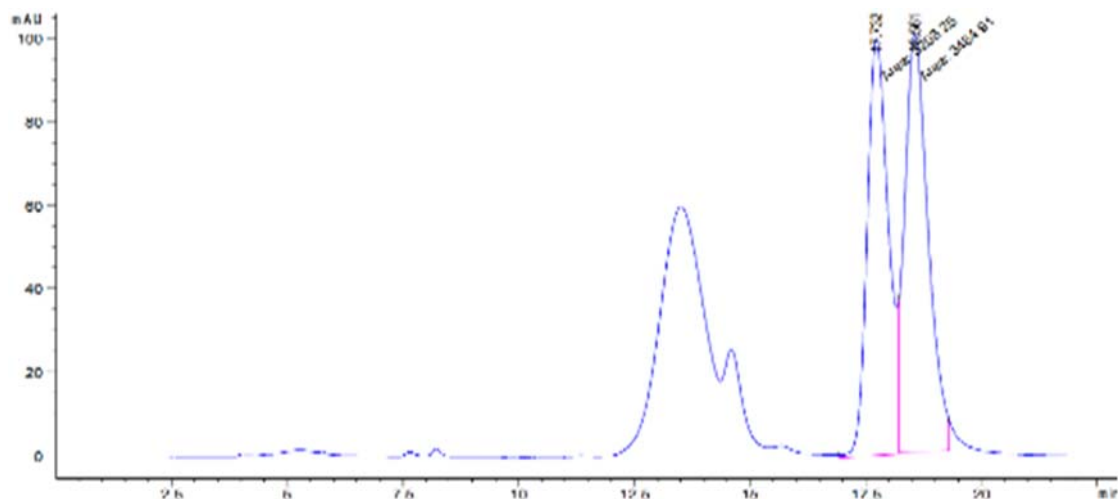

| Peak # | RetTime [min] | Type | Width [min] | Area [mAU*s] | Height [mAU] | Area %  |
|--------|---------------|------|-------------|--------------|--------------|---------|
| 1      | 17.732        | MM   | 0.5357      | 3208.25342   | 99.82164     | 47.9333 |
| 2      | 18.561        | MM   | 0.5801      | 3484.91431   | 100.12344    | 52.0667 |

### HPLC data using L1

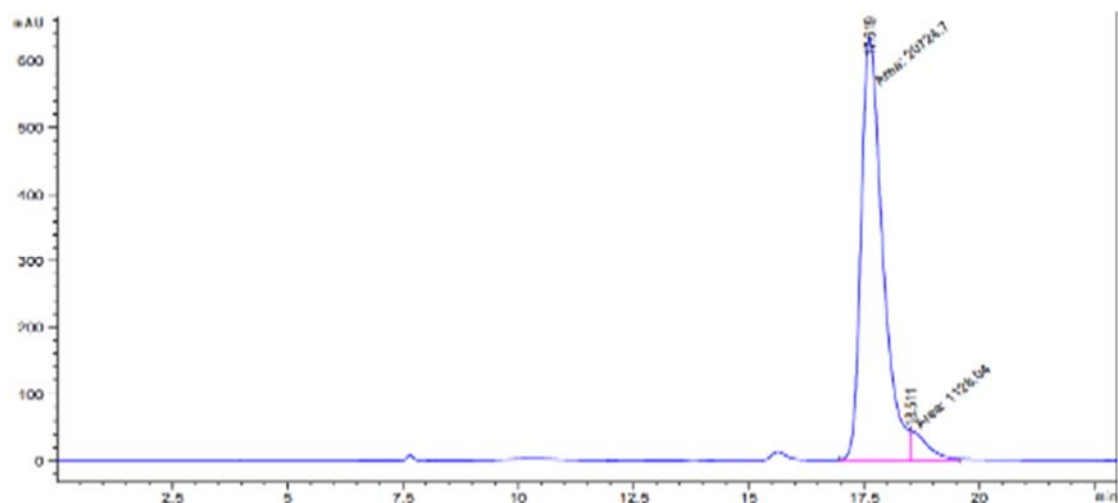

| Peak # | RetTime [min] | Type | Width [min] | Area [mAU*s] | Height [mAU] | Area %  |
|--------|---------------|------|-------------|--------------|--------------|---------|
| 1      | 17.619        | MM   | 0.5449      | 2.07247e4    | 633.87415    | 94.8380 |
| 2      | 18.511        | MM   | 0.4184      | 1128.03503   | 44.93483     | 5.1620  |

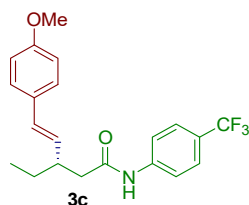

### HPLC data using rac-L1

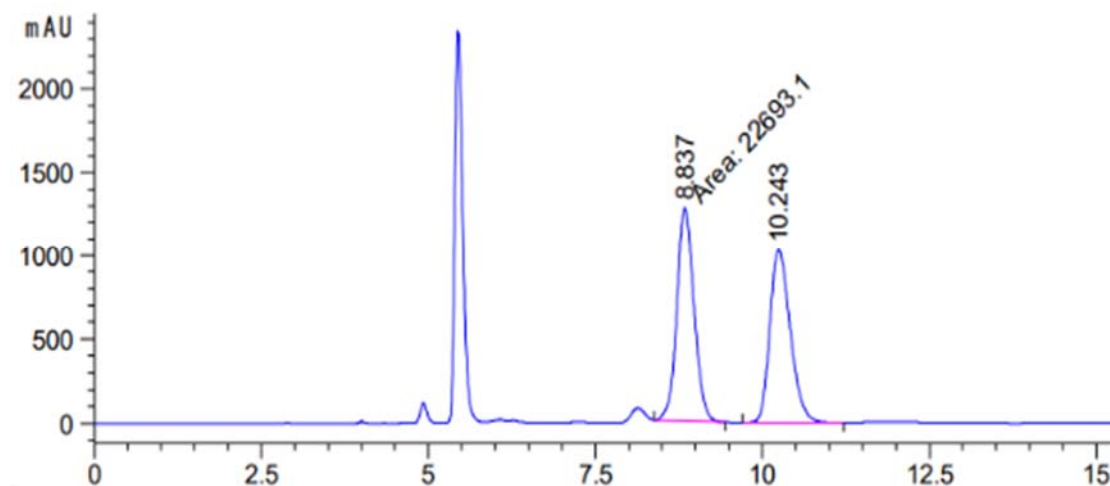

| Peak # | RetTime [min] | Type | Width [min] | Area [mAU*s] | Height [mAU] | Area %  |
|--------|---------------|------|-------------|--------------|--------------|---------|
| 1      | 8.837         | MM   | 0.2967      | 2.26931e4    | 1274.68542   | 50.9733 |
| 2      | 10.243        | BB   | 0.3274      | 2.18265e4    | 1029.26038   | 49.0267 |

### HPLC data using L1

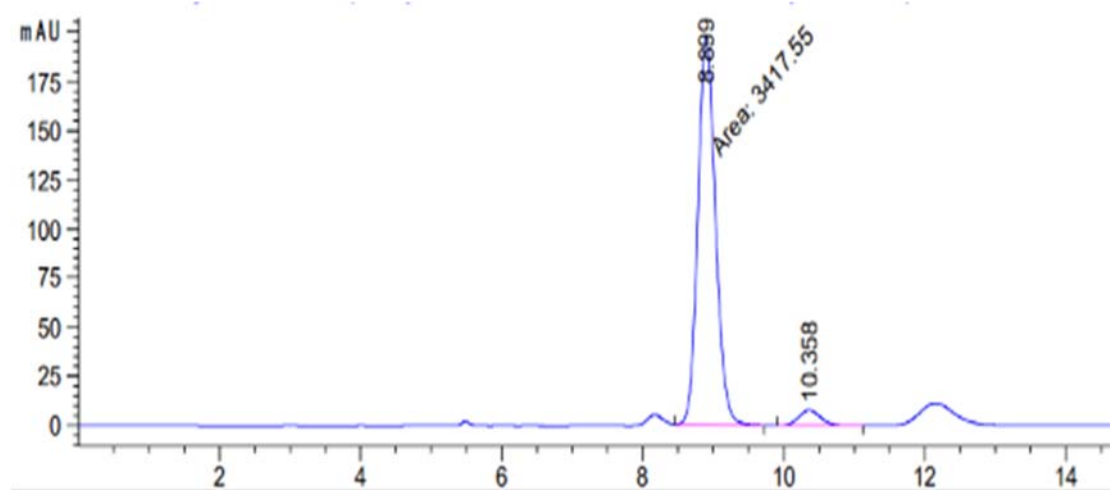

| Peak # | RetTime [min] | Type | Width [min] | Area [mAU*s] | Height [mAU] | Area %  |
|--------|---------------|------|-------------|--------------|--------------|---------|
| 1      | 8.899         | MM   | 0.2887      | 3417.55225   | 197.26672    | 95.3075 |
| 2      | 10.358        | BB   | 0.3305      | 168.26343    | 7.83668      | 4.6925  |

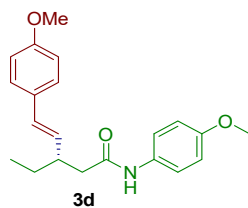

HPLC data using rac-L1

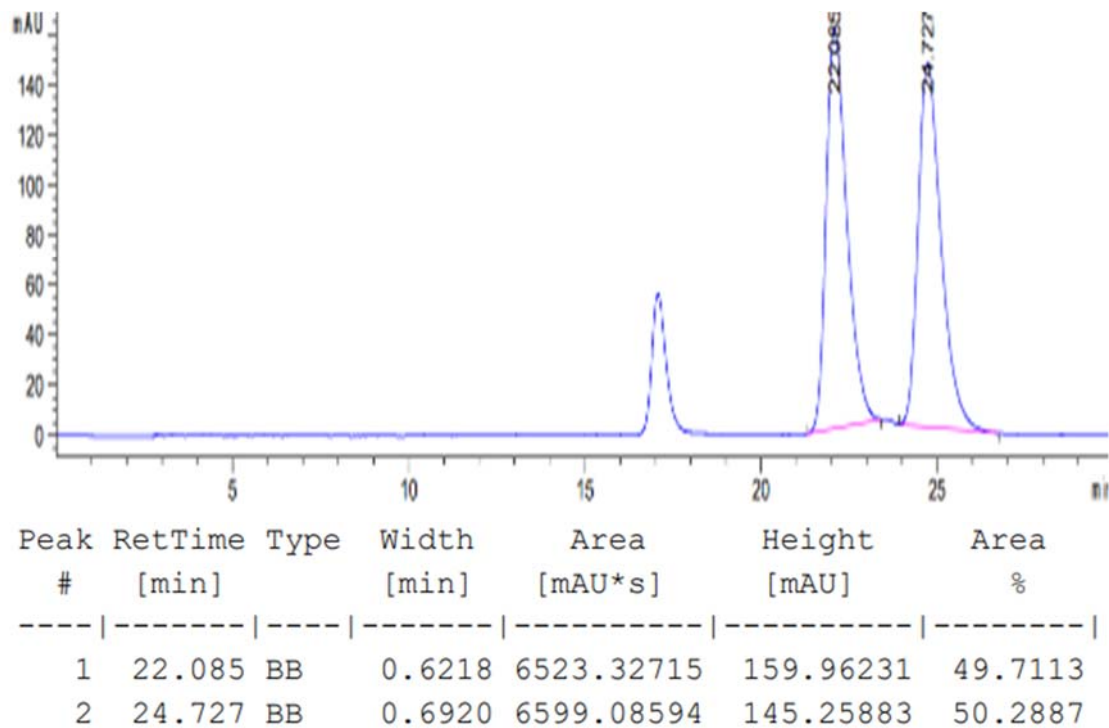

HPLC data using L1

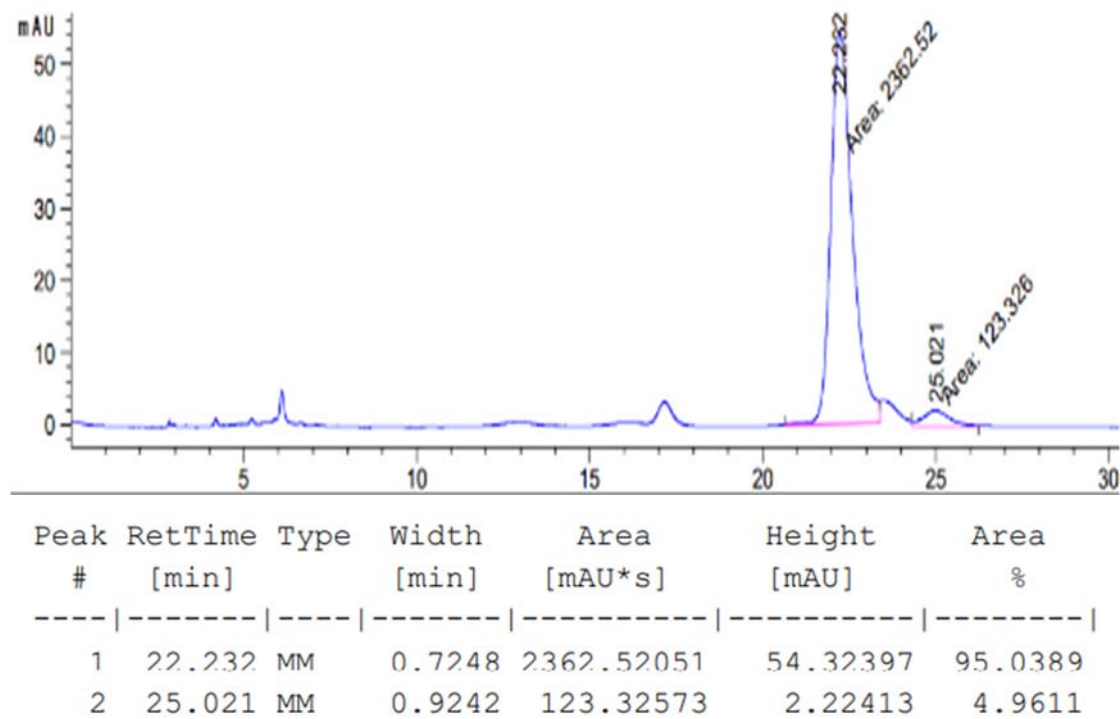

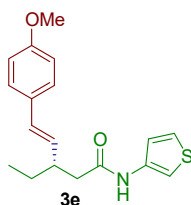

### HPLC data using rac-L1

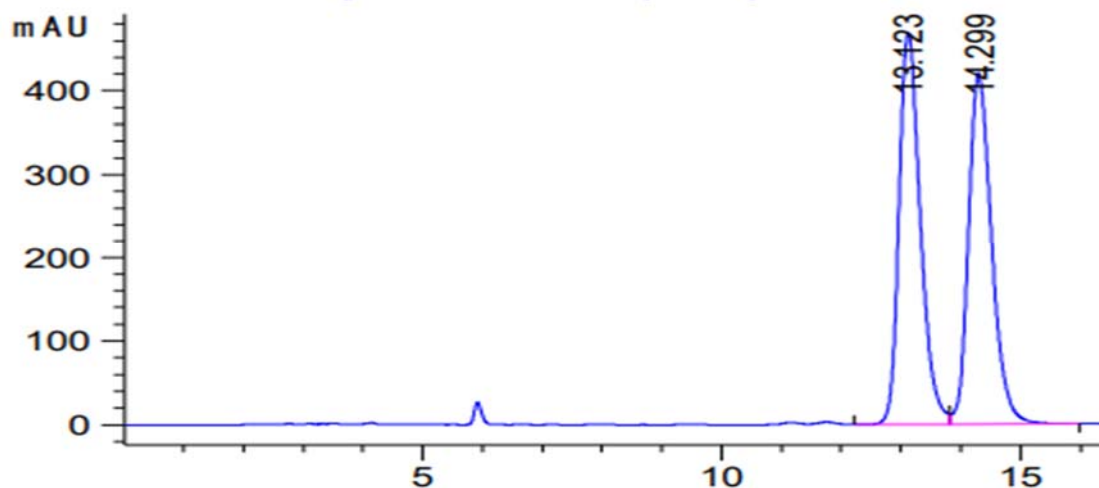

| Peak # | RetTime [min] | Type | Width [min] | Area [mAU*s] | Height [mAU] | Area %  |
|--------|---------------|------|-------------|--------------|--------------|---------|
| 1      | 13.123        | BV   | 0.3836      | 1.16361e4    | 468.71271    | 50.7074 |
| 2      | 14.299        | VB   | 0.4140      | 1.13114e4    | 420.29257    | 49.2926 |

### HPLC data using L1

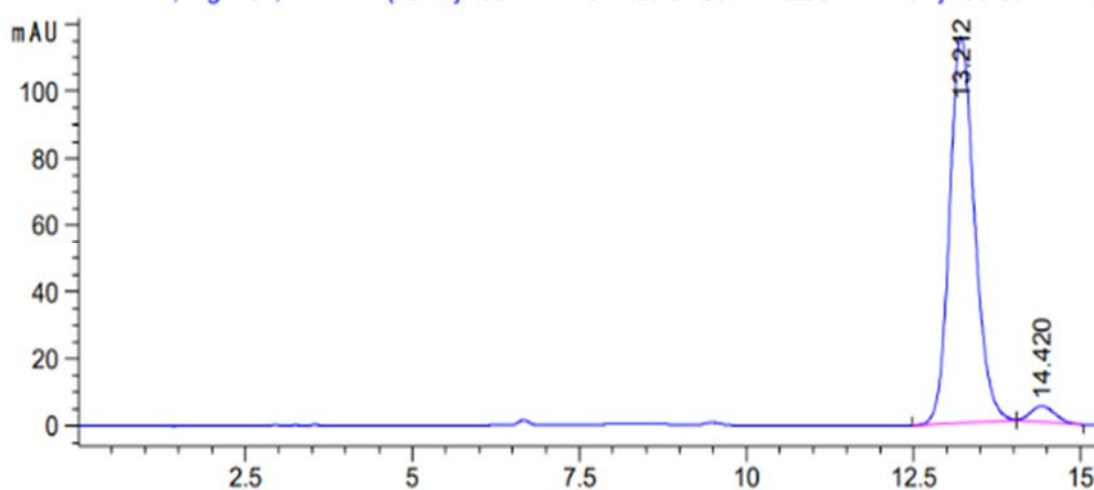

| Peak # | RetTime [min] | Type | Width [min] | Area [mAU*s] | Height [mAU] | Area %  |
|--------|---------------|------|-------------|--------------|--------------|---------|
| 1      | 13.212        | BB   | 0.4006      | 2988.12817   | 115.20288    | 96.3331 |
| 2      | 14.420        | BB   | 0.3878      | 113.74168    | 4.57962      | 3.6669  |



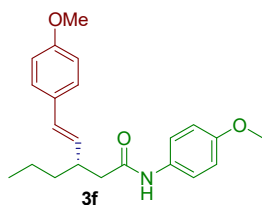

### HPLC data using rac-L1

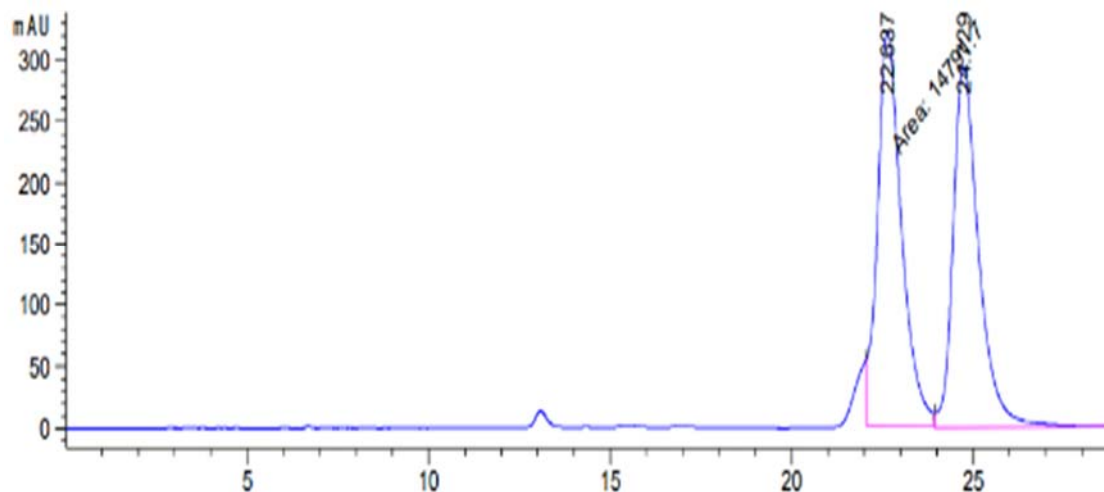

| Peak # | RetTime [min] | Type | Width [min] | Area [mAU*s] | Height [mAU] | Area %  |
|--------|---------------|------|-------------|--------------|--------------|---------|
| 1      | 22.637        | MM   | 0.7676      | 1.47917e4    | 321.15363    | 50.4893 |
| 2      | 24.729        | VB   | 0.7368      | 1.45050e4    | 294.40417    | 49.5107 |

### HPLC data using L1

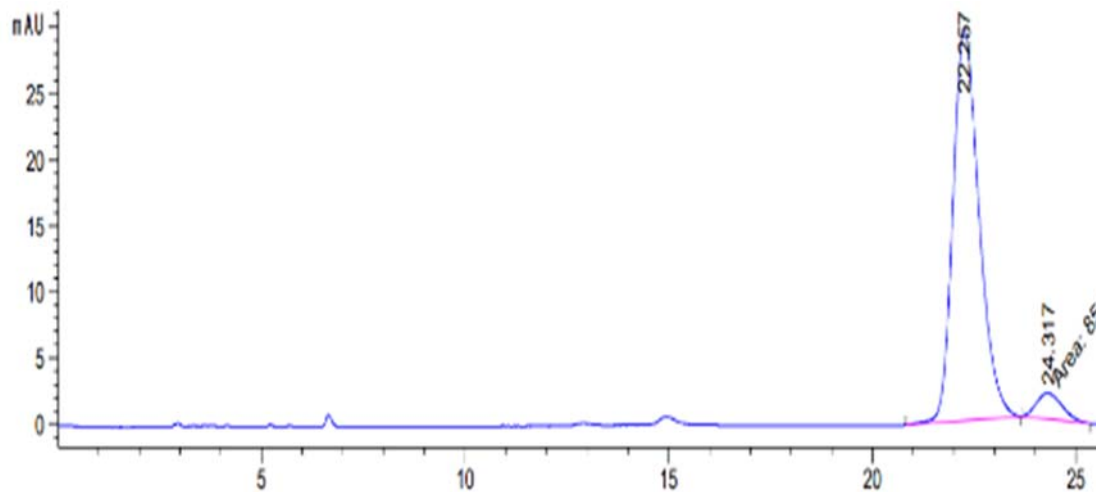

| Peak # | RetTime [min] | Type | Width [min] | Area [mAU*s] | Height [mAU] | Area %  |
|--------|---------------|------|-------------|--------------|--------------|---------|
| 1      | 22.257        | BB   | 0.6889      | 1318.62415   | 29.53568     | 93.9210 |
| 2      | 24.317        | MM   | 0.7313      | 85.34719     | 1.94502      | 6.0790  |

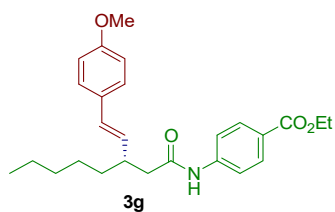

### HPLC data using rac-L1

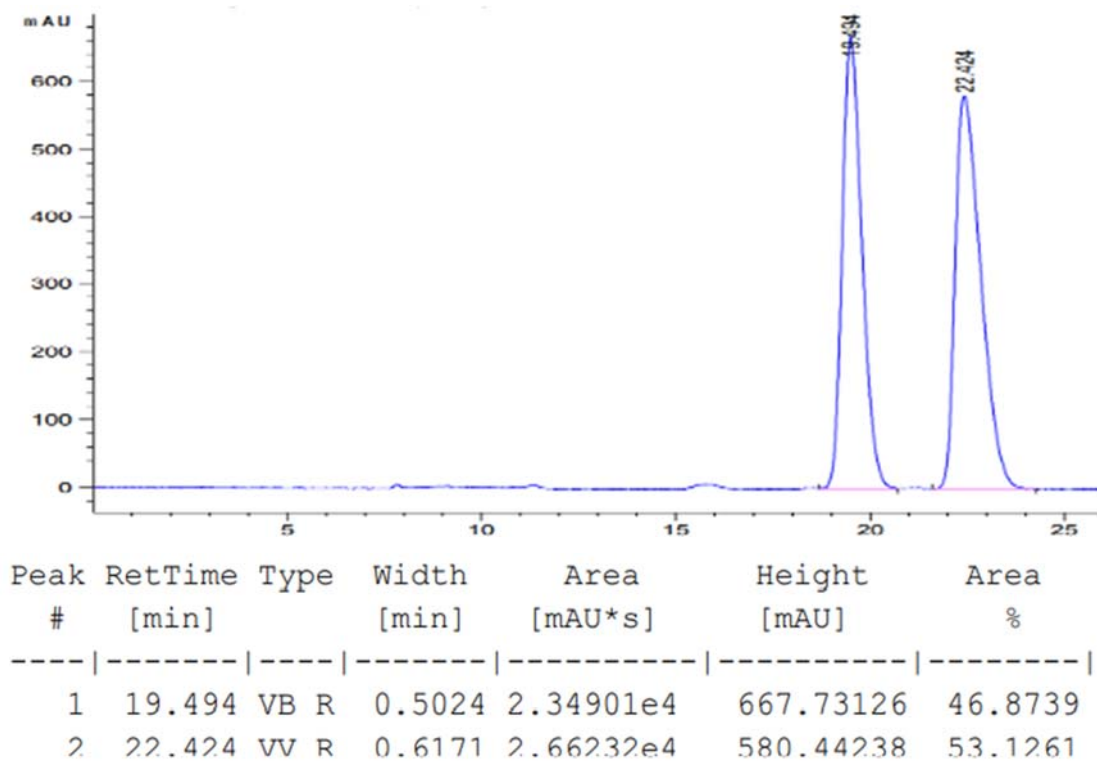

### HPLC data using L1

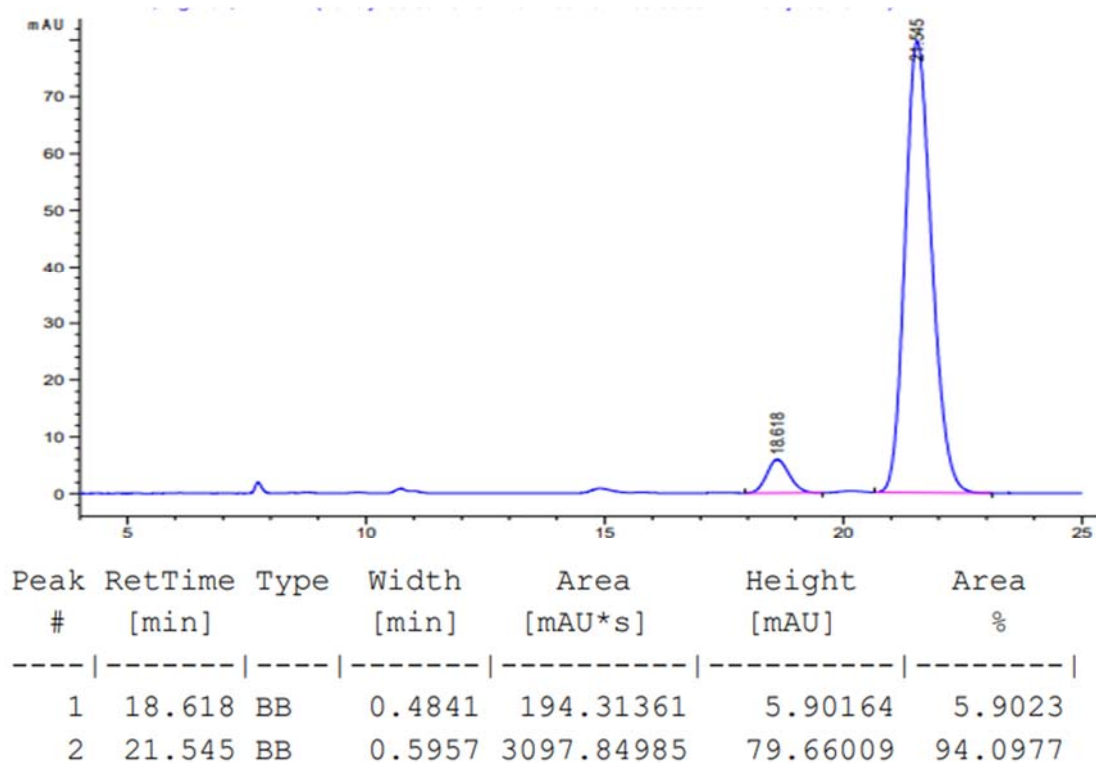

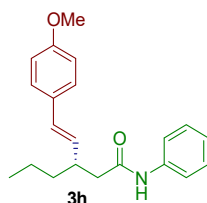

HPLC data using rac-L1

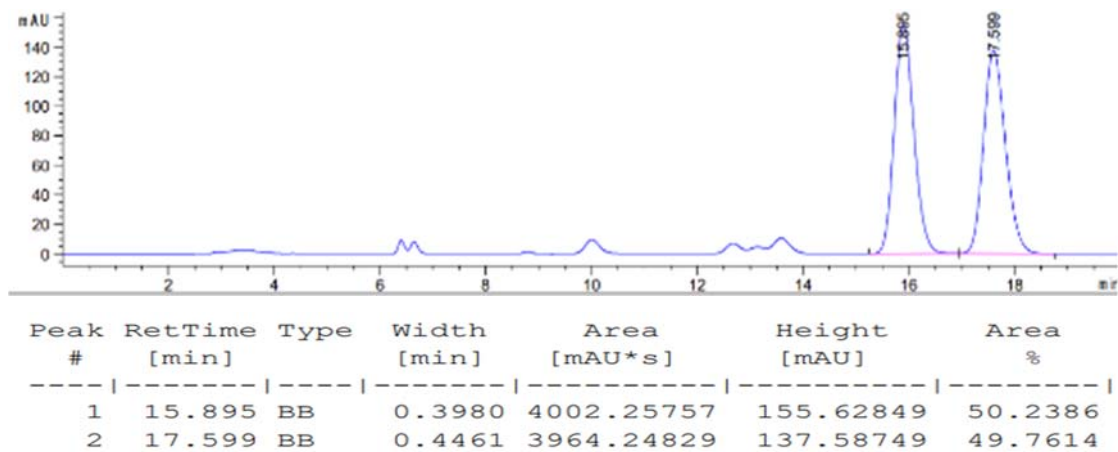

HPLC data using L1(Method A)

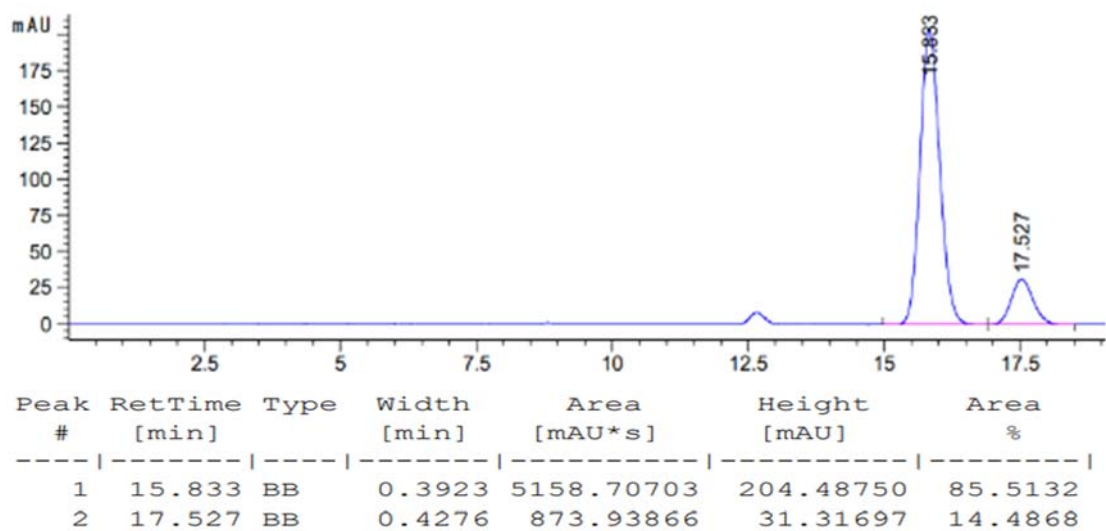

HPLC data using L1(Method B)

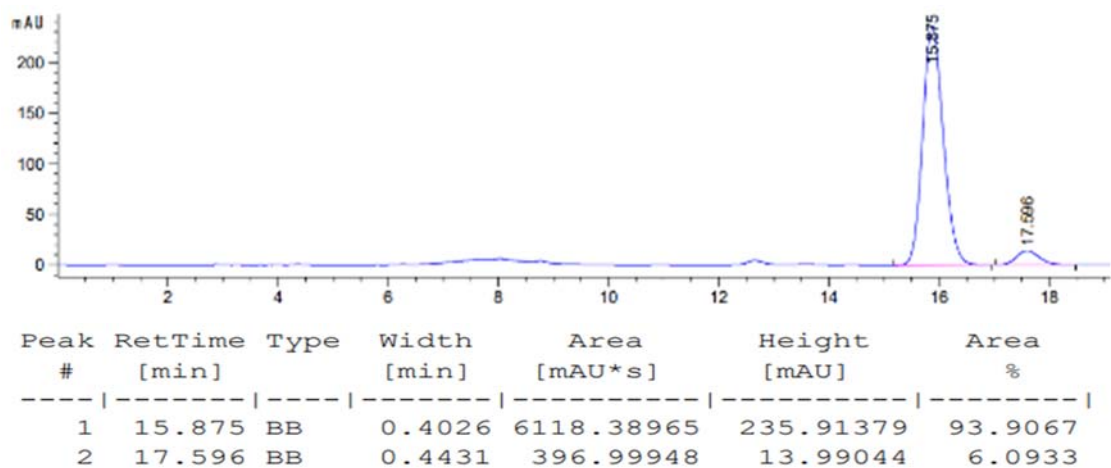

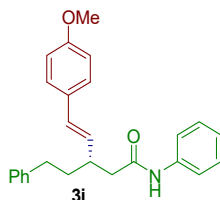

### HPLC data using rac-L1

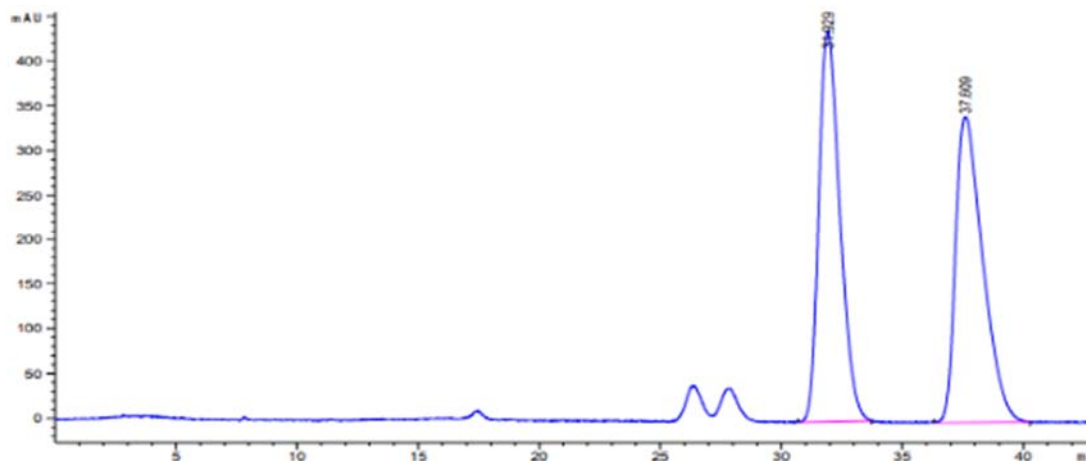

| Peak # | RetTime [min] | Type | Width [min] | Area [mAU*s] | Height [mAU] | Area %  |
|--------|---------------|------|-------------|--------------|--------------|---------|
| 1      | 31.929        | VV R | 0.7313      | 2.64739e4    | 436.67569    | 49.8419 |
| 2      | 37.609        | VV R | 0.9140      | 2.66419e4    | 342.30954    | 50.1581 |

### HPLC data using L1

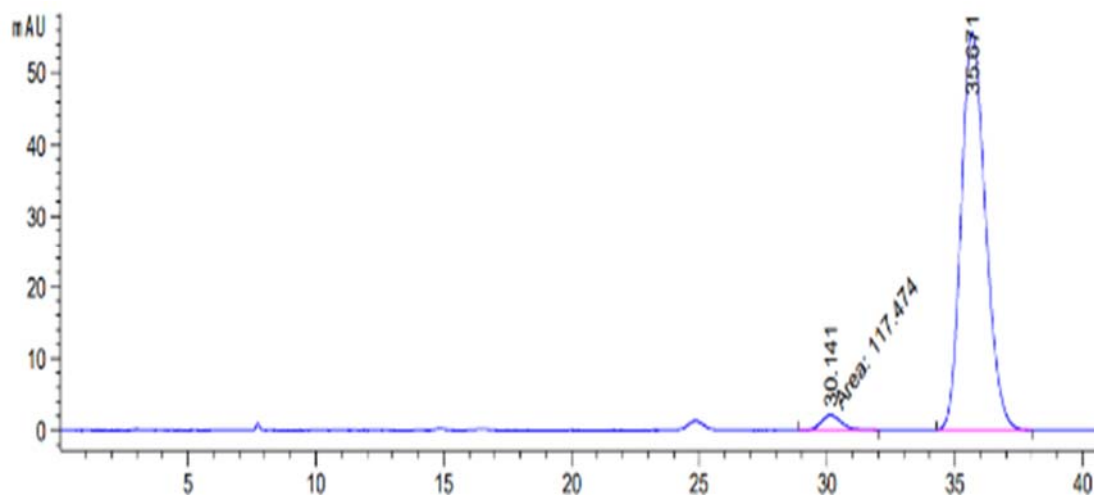

| Peak # | RetTime [min] | Type | Width [min] | Area [mAU*s] | Height [mAU] | Area %  |
|--------|---------------|------|-------------|--------------|--------------|---------|
| 1      | 30.141        | MM   | 0.9365      | 117.47357    | 2.09075      | 3.1062  |
| 2      | 35.671        | BB   | 1.0098      | 3664.40503   | 55.53914     | 96.8938 |

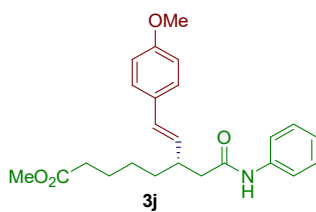

### HPLC data using rac-L1

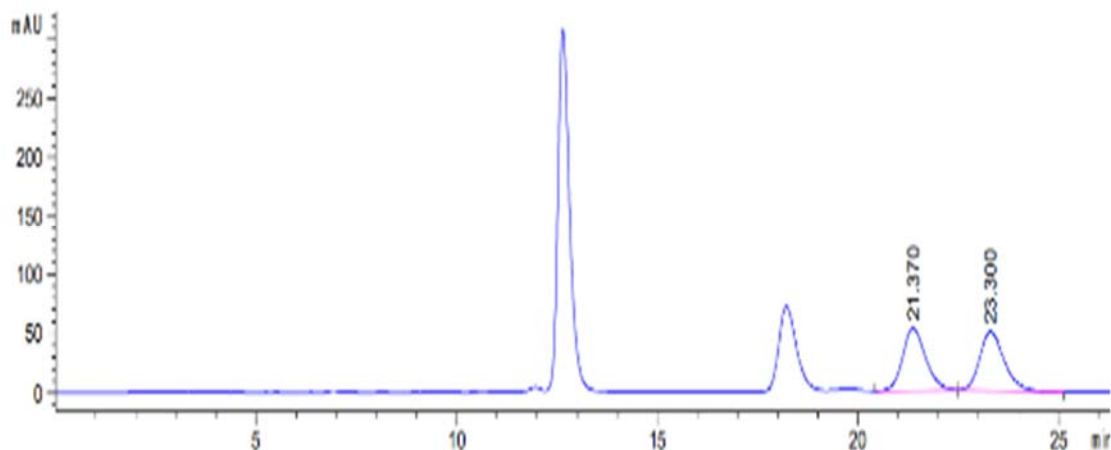

| Peak # | RetTime [min] | Type | Width [min] | Area [mAU*s] | Height [mAU] | Area %  |
|--------|---------------|------|-------------|--------------|--------------|---------|
| 1      | 21.370        | BB   | 0.6081      | 2106.78540   | 52.50605     | 49.8947 |
| 2      | 23.300        | BB   | 0.6548      | 2115.68042   | 49.68749     | 50.1053 |

### HPLC data using L1

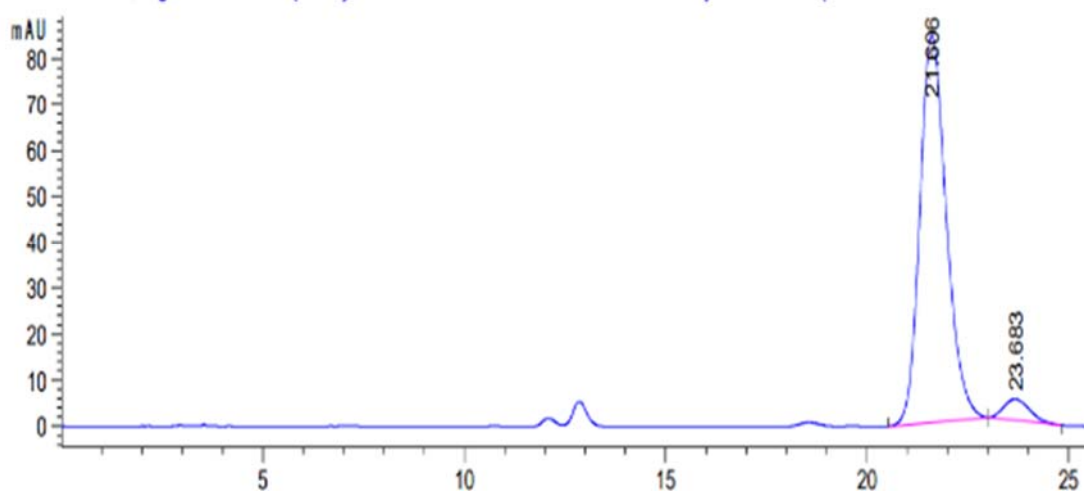

| Peak # | RetTime [min] | Type | Width [min] | Area [mAU*s] | Height [mAU] | Area %  |
|--------|---------------|------|-------------|--------------|--------------|---------|
| 1      | 21.606        | BB   | 0.7045      | 3847.72168   | 84.29404     | 94.9649 |
| 2      | 23.683        | BB   | 0.5597      | 204.00734    | 4.59734      | 5.0351  |

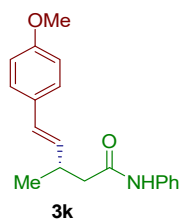

### HPLC data using rac-L1

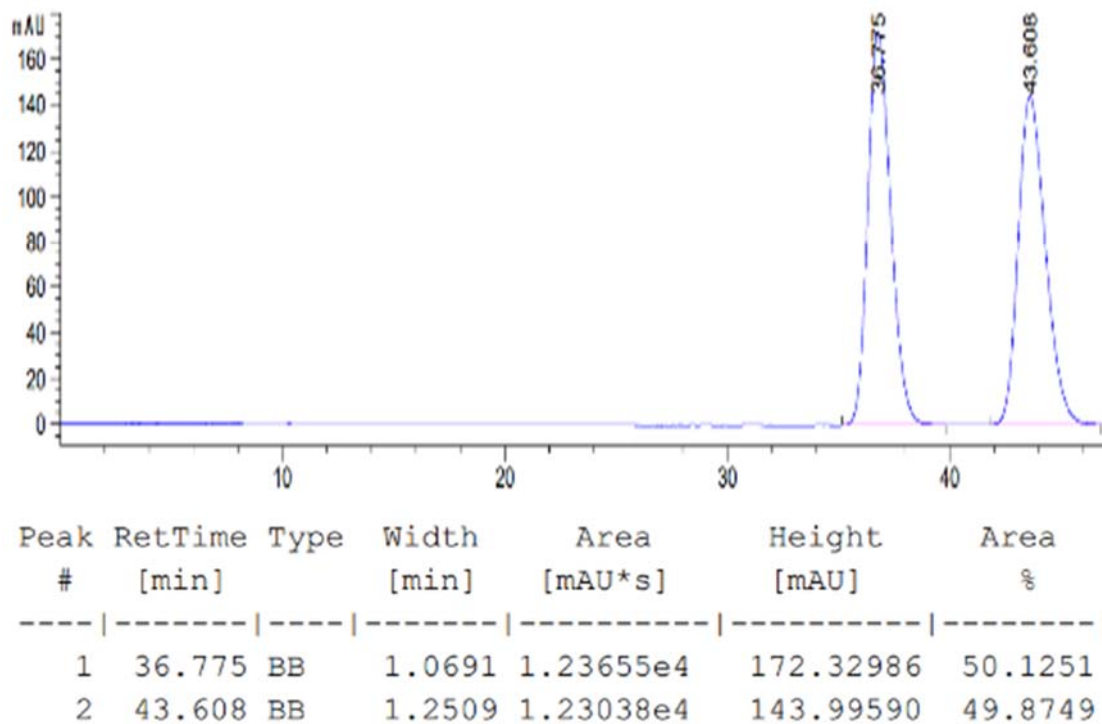

### HPLC data using L1

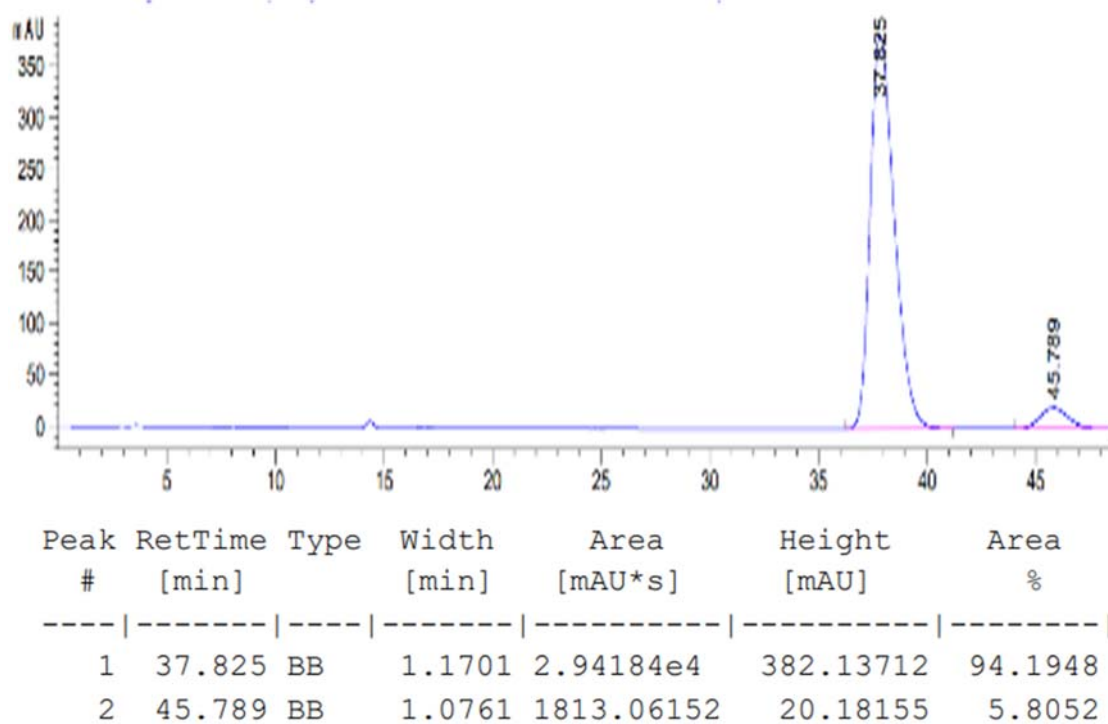



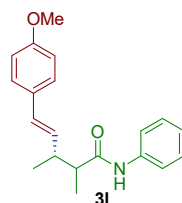

### HPLC data using rac-L1

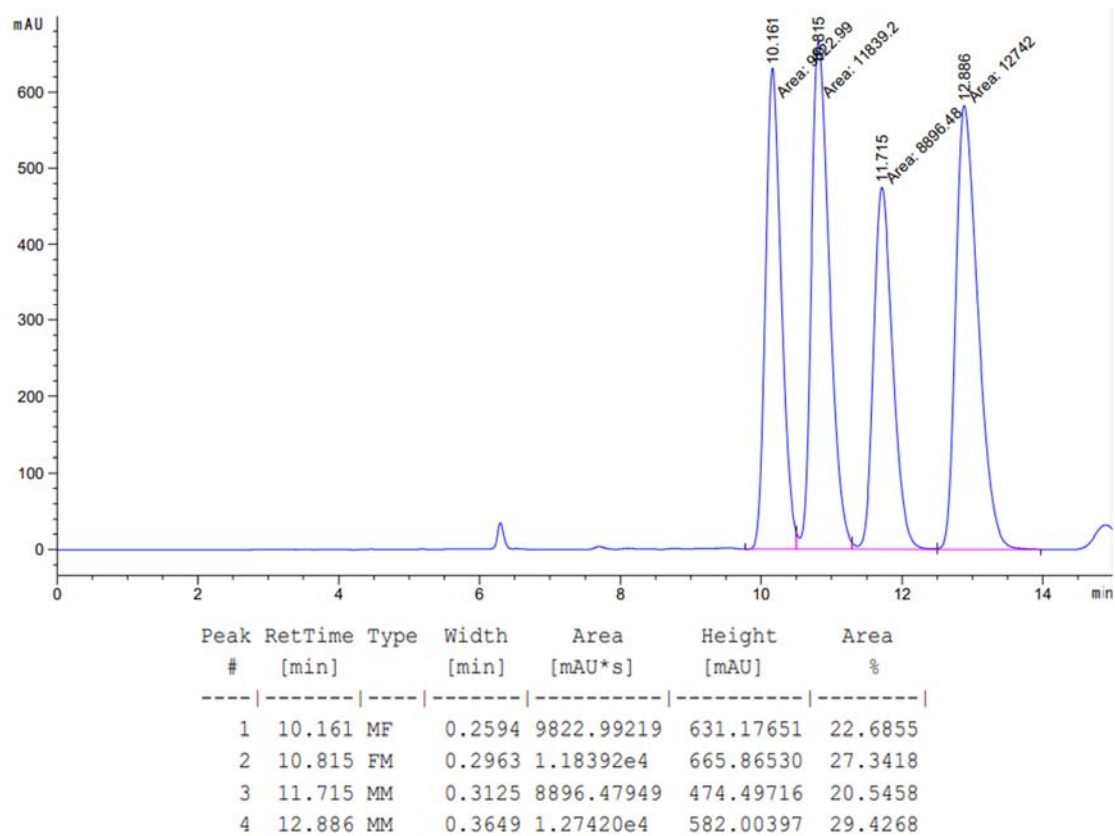

### HPLC data using L1

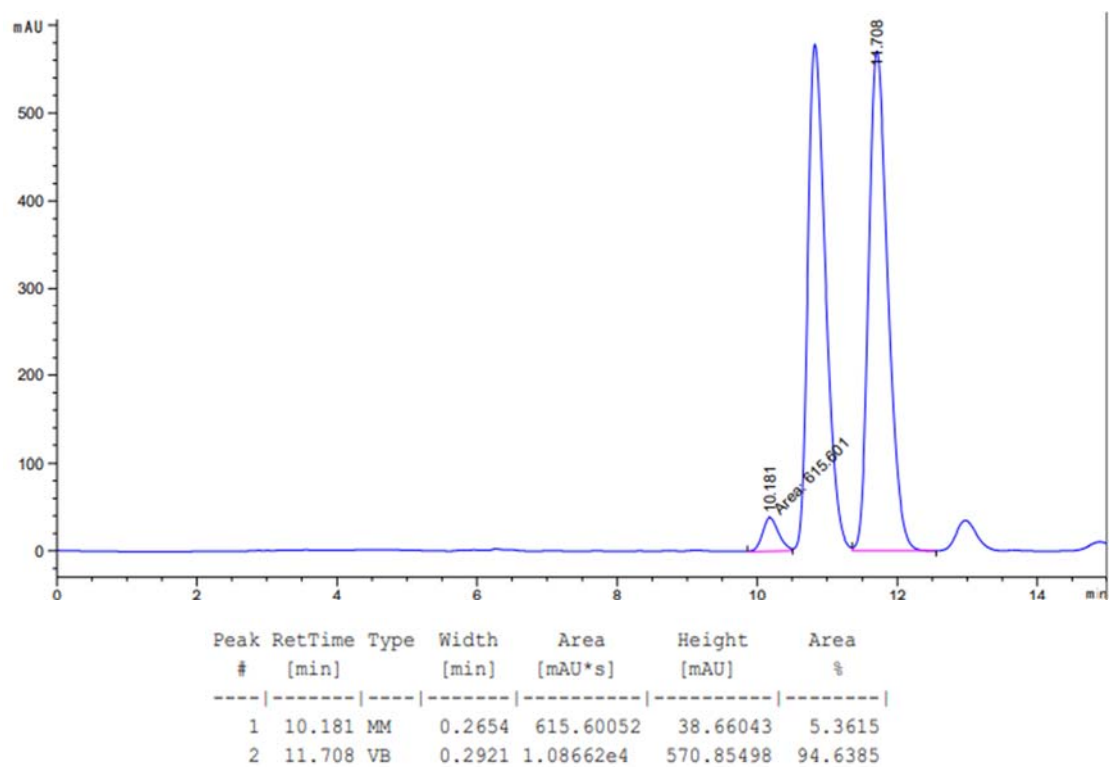

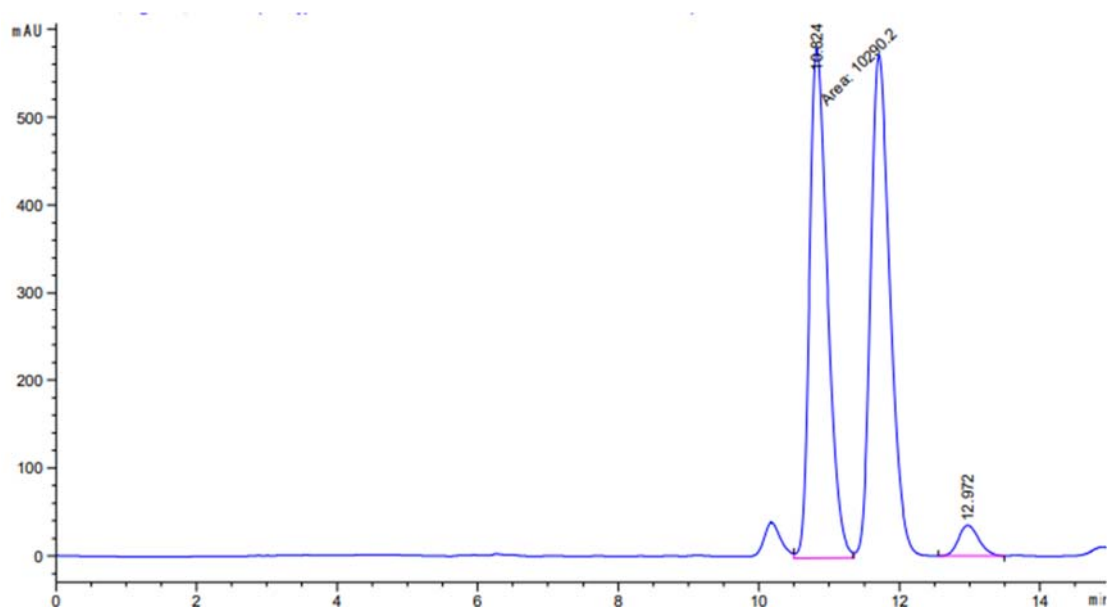

| Peak # | RetTime [min] | Type | Width [min] | Area [mAU*s] | Height [mAU] | Area %  |
|--------|---------------|------|-------------|--------------|--------------|---------|
| 1      | 10.824        | MM   | 0.2953      | 1.02902e4    | 580.76996    | 93.6606 |
| 2      | 12.972        | BB   | 0.3127      | 696.49036    | 34.61568     | 6.3394  |



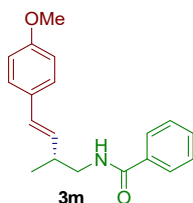

### HPLC data using rac-L1

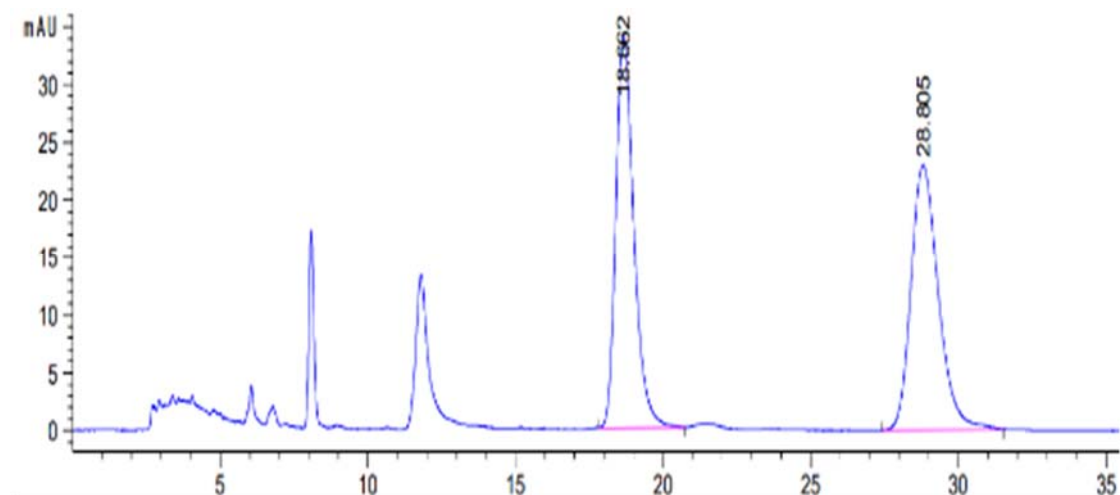

| Peak # | RetTime [min] | Type | Width [min] | Area [mAU*s] | Height [mAU] | Area %  |
|--------|---------------|------|-------------|--------------|--------------|---------|
| 1      | 18.662        | BB   | 0.6380      | 1440.01636   | 34.14860     | 49.3292 |
| 2      | 28.805        | BB   | 0.8858      | 1479.18225   | 23.01514     | 50.6708 |

### HPLC data using L1

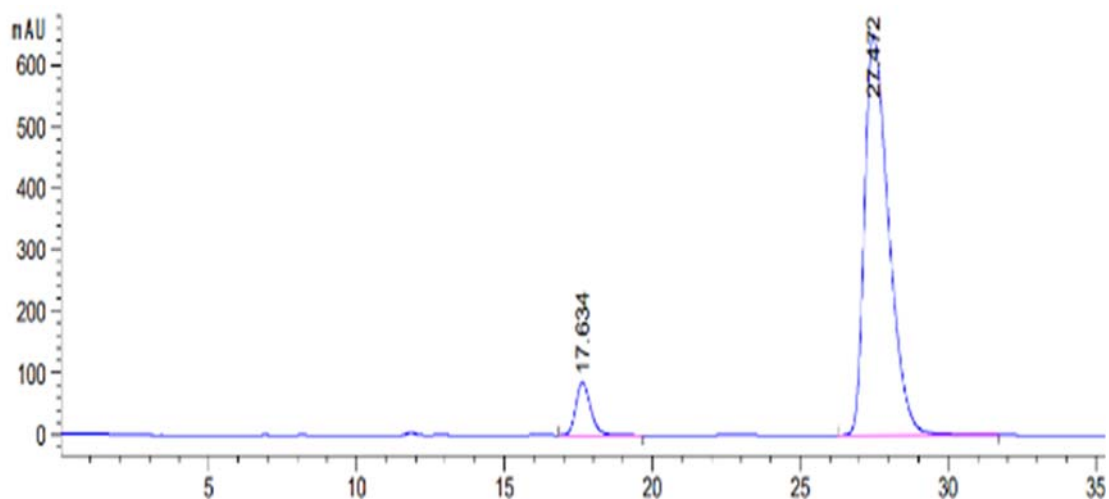

| Peak # | RetTime [min] | Type | Width [min] | Area [mAU*s] | Height [mAU] | Area %  |
|--------|---------------|------|-------------|--------------|--------------|---------|
| 1      | 17.634        | BB   | 0.5224      | 2924.10132   | 85.62224     | 7.3891  |
| 2      | 27.472        | BB   | 0.8680      | 3.66491e4    | 649.82788    | 92.6109 |

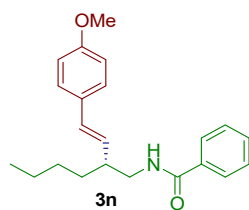

### HPLC data using rac-L1

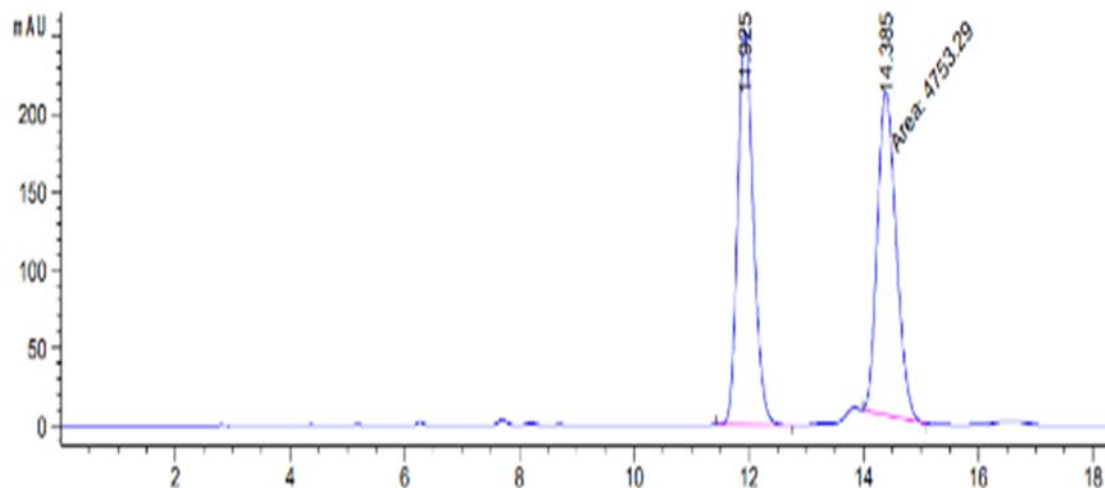

| Peak # | RetTime [min] | Type | Width [min] | Area [mAU*s] | Height [mAU] | Area %  |
|--------|---------------|------|-------------|--------------|--------------|---------|
| 1      | 11.925        | BB   | 0.2936      | 4805.69580   | 253.04465    | 50.2741 |
| 2      | 14.385        | MM   | 0.3808      | 4753.29053   | 208.02565    | 49.7259 |

### HPLC data using L1

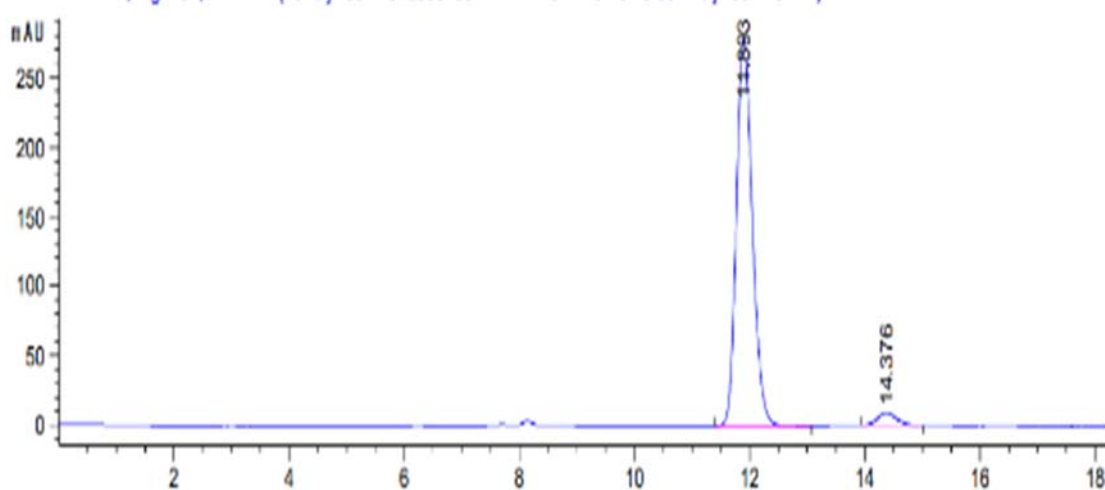

| Peak # | RetTime [min] | Type | Width [min] | Area [mAU*s] | Height [mAU] | Area %  |
|--------|---------------|------|-------------|--------------|--------------|---------|
| 1      | 11.893        | BB   | 0.2954      | 5338.65527   | 278.82727    | 96.2485 |
| 2      | 14.376        | BB   | 0.3517      | 208.08792    | 9.06777      | 3.7515  |

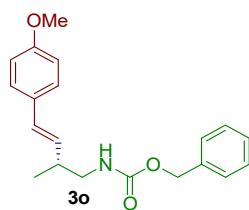

### HPLC data using rac-L1

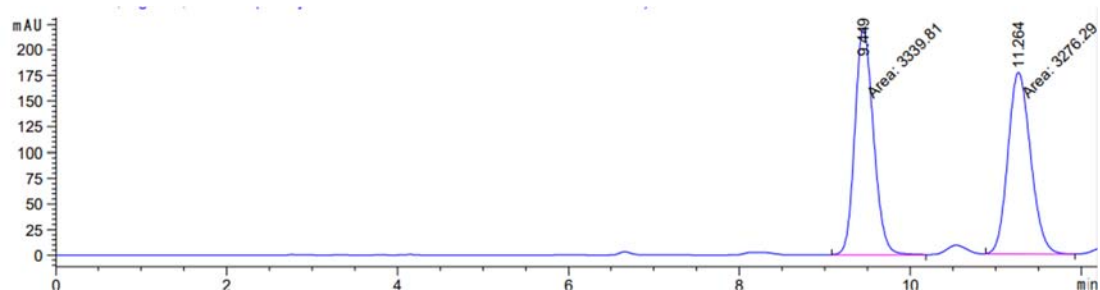

| Peak # | RetTime [min] | Type | Width [min] | Area [mAU*s] | Height [mAU] | Area %  |
|--------|---------------|------|-------------|--------------|--------------|---------|
| 1      | 9.449         | MM   | 0.2522      | 3339.81006   | 220.67616    | 50.4800 |
| 2      | 11.264        | MM   | 0.3087      | 3276.29272   | 176.90694    | 49.5200 |

### HPLC data using L1

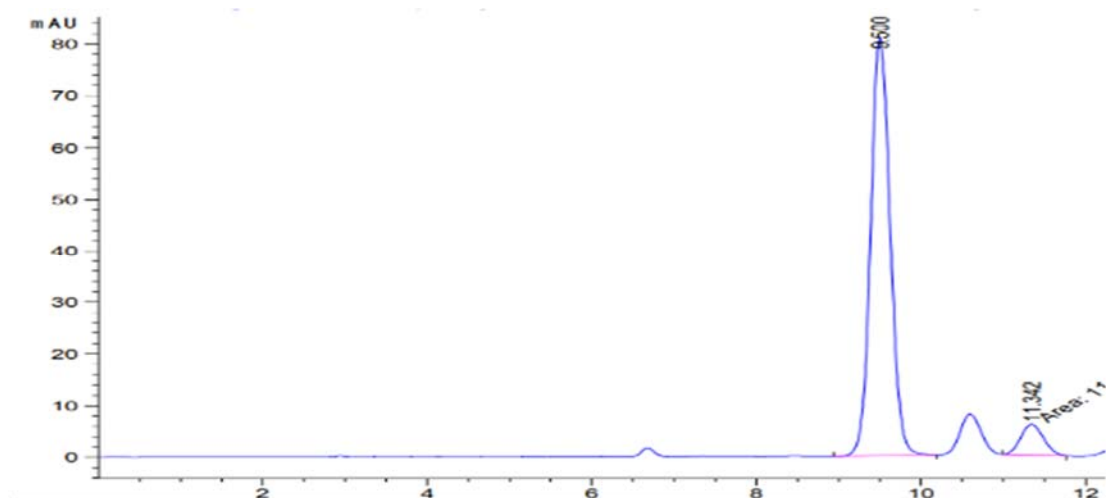

| Peak # | RetTime [min] | Type | Width [min] | Area [mAU*s] | Height [mAU] | Area %  |
|--------|---------------|------|-------------|--------------|--------------|---------|
| 1      | 9.500         | BB   | 0.2580      | 1331.25269   | 80.89272     | 92.0573 |
| 2      | 11.342        | MM   | 0.3235      | 114.86008    | 5.91831      | 7.9427  |

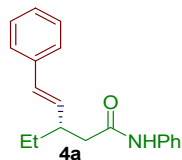

### HPLC data using rac-L1

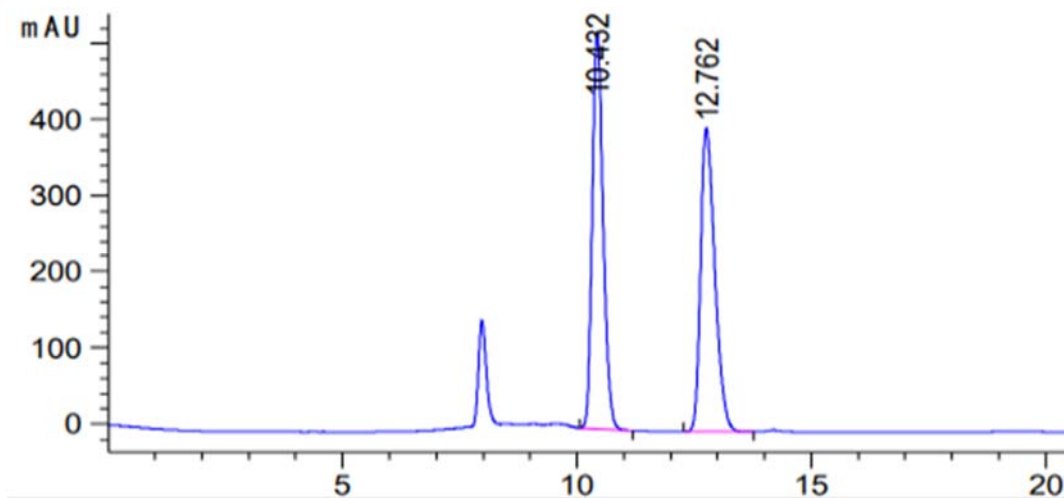

| Peak # | RetTime [min] | Type | Width [min] | Area [mAU*s] | Height [mAU] | Area %  |
|--------|---------------|------|-------------|--------------|--------------|---------|
| 1      | 10.432        | BB   | 0.2476      | 8351.00293   | 519.43225    | 49.8438 |
| 2      | 12.762        | BB   | 0.3245      | 8403.34375   | 397.64615    | 50.1562 |

### HPLC data using L1

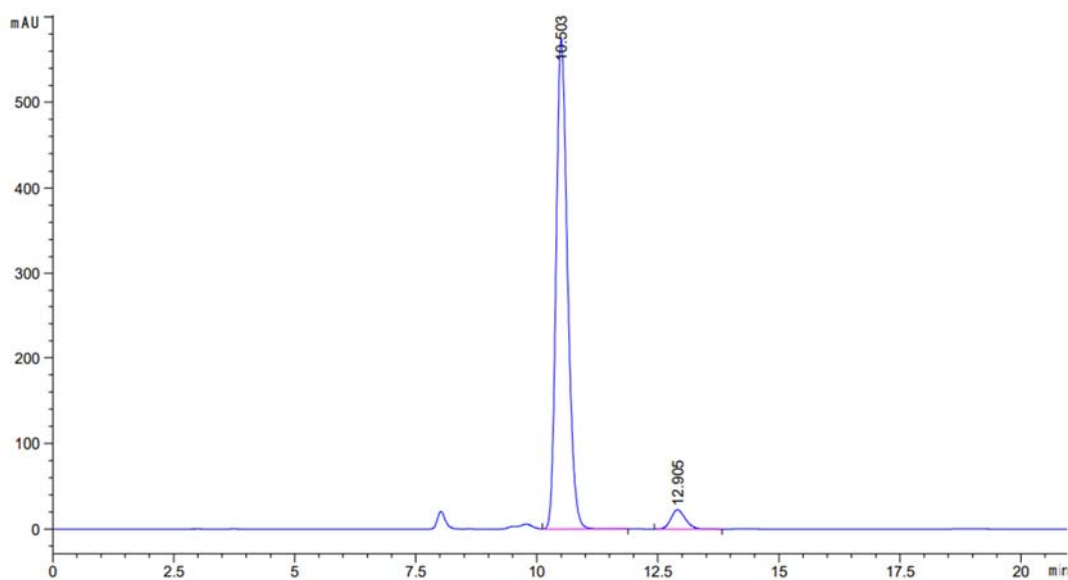

| Peak # | RetTime [min] | Type | Width [min] | Area [mAU*s] | Height [mAU] | Area %  |
|--------|---------------|------|-------------|--------------|--------------|---------|
| 1      | 10.503        | VB   | 0.2513      | 9414.79199   | 574.18719    | 95.2982 |
| 2      | 12.905        | BB   | 0.3162      | 464.50330    | 22.55820     | 4.7018  |

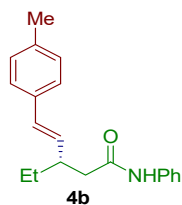

### HPLC data using rac-L1

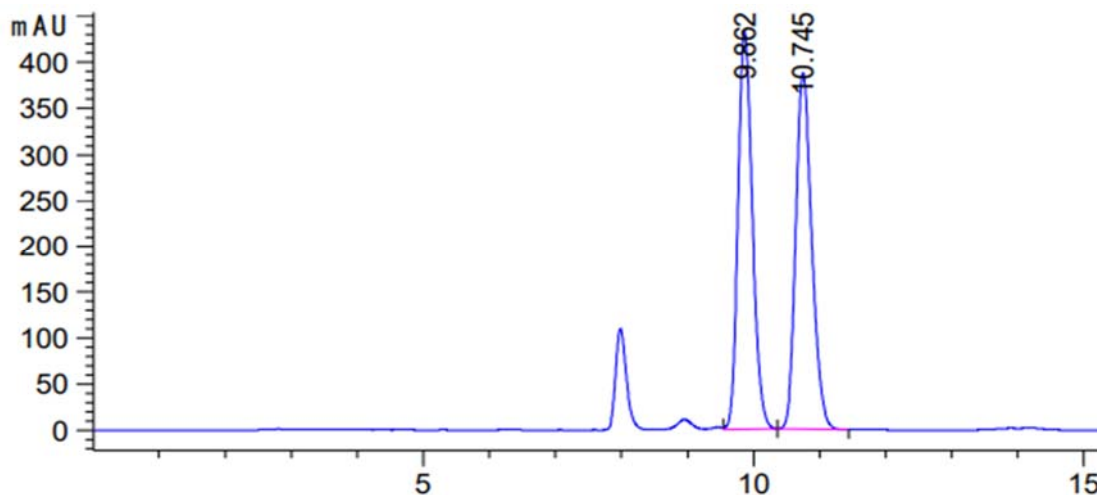

| Peak # | RetTime [min] | Type | Width [min] | Area [mAU*s] | Height [mAU] | Area %  |
|--------|---------------|------|-------------|--------------|--------------|---------|
| 1      | 9.862         | VB   | 0.2339      | 6517.29736   | 432.35846    | 49.8786 |
| 2      | 10.745        | BB   | 0.2613      | 6549.02148   | 387.20273    | 50.1214 |

### HPLC data using L1

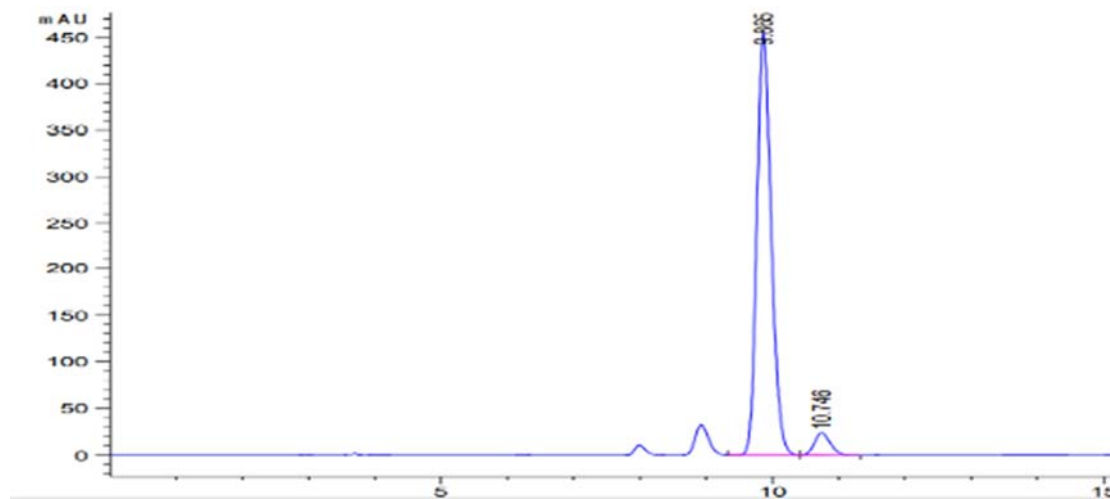

| Peak # | RetTime [min] | Type | Width [min] | Area [mAU*s] | Height [mAU] | Area %  |
|--------|---------------|------|-------------|--------------|--------------|---------|
| 1      | 9.865         | BV   | 0.2321      | 6853.49268   | 453.97610    | 94.4885 |
| 2      | 10.746        | VB   | 0.2575      | 399.76559    | 23.85170     | 5.5115  |

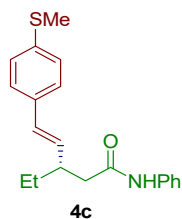

### HPLC data using rac-L1

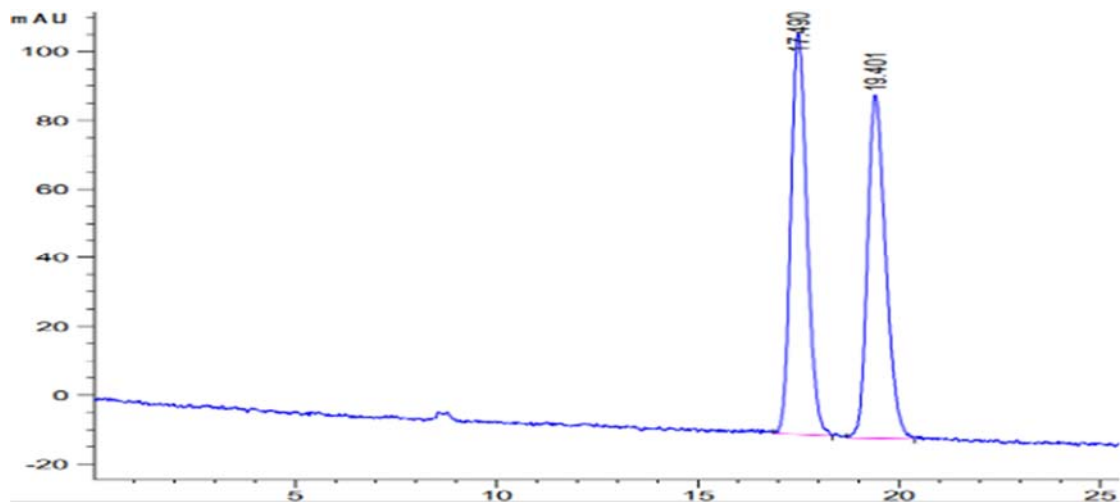

| Peak # | RetTime [min] | Type | Width [min] | Area [mAU*s] | Height [mAU] | Area %  |
|--------|---------------|------|-------------|--------------|--------------|---------|
| 1      | 17.490        | VV R | 0.3893      | 3239.34619   | 116.90580    | 50.6718 |
| 2      | 19.401        | VV R | 0.4224      | 3153.45752   | 99.85294     | 49.3282 |

### HPLC data using L1

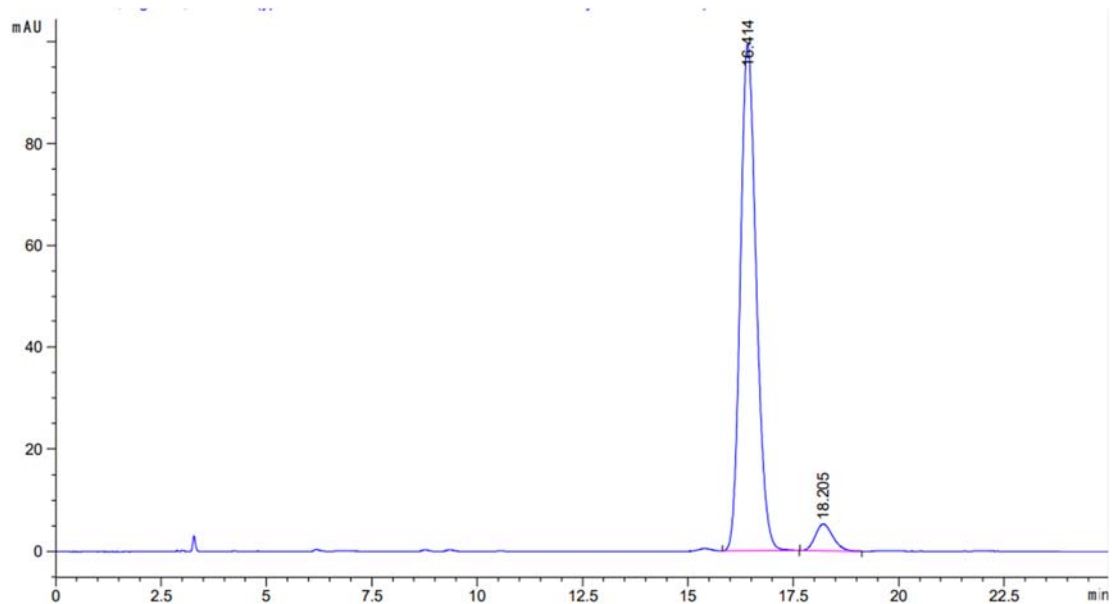

| Peak # | RetTime [min] | Type | Width [min] | Area [mAU*s] | Height [mAU] | Area %  |
|--------|---------------|------|-------------|--------------|--------------|---------|
| 1      | 16.414        | BB   | 0.4046      | 2610.75586   | 99.34956     | 94.4788 |
| 2      | 18.205        | BB   | 0.4329      | 152.56882    | 5.25273      | 5.5212  |



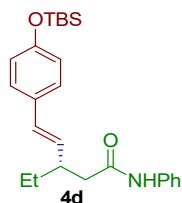

### HPLC data using rac-L1

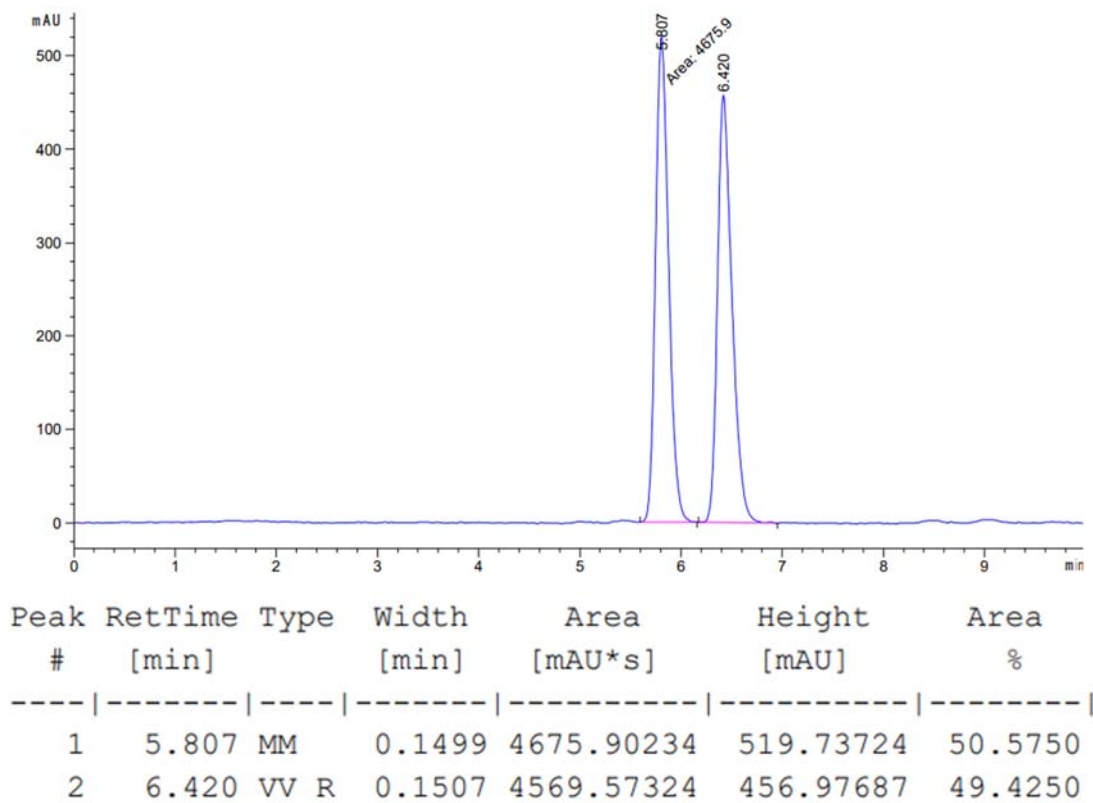

### HPLC data using L1

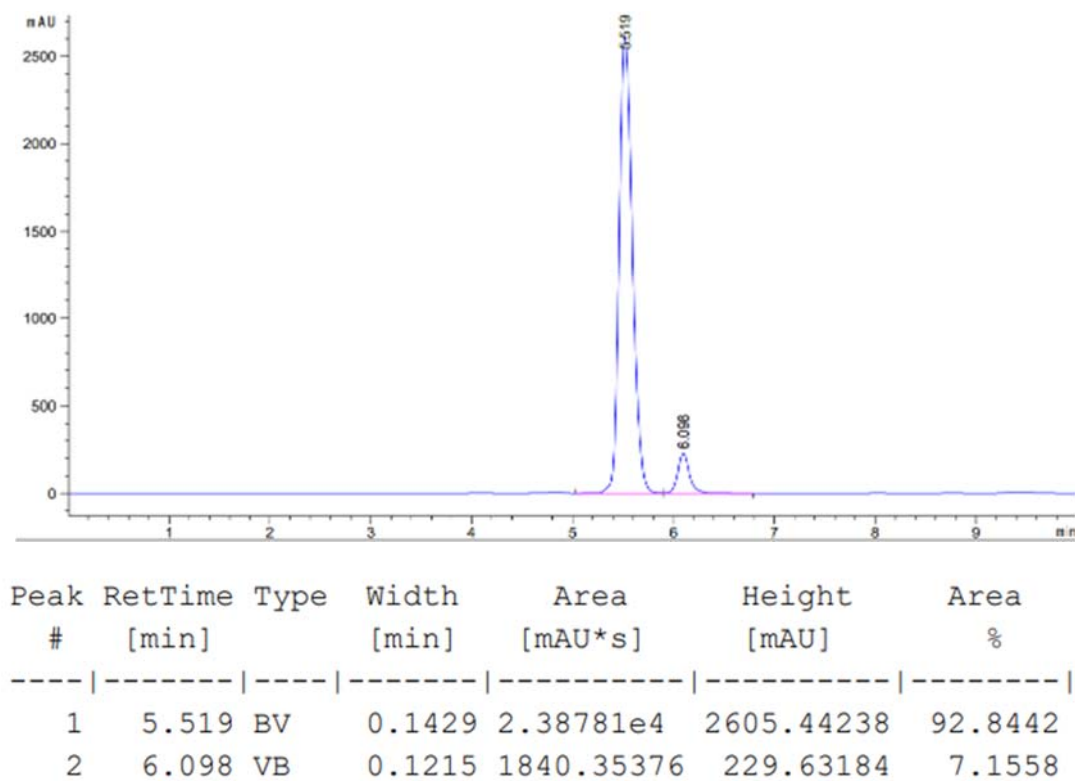

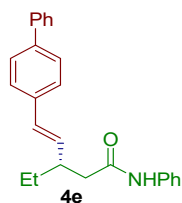

### HPLC data using rac-L1

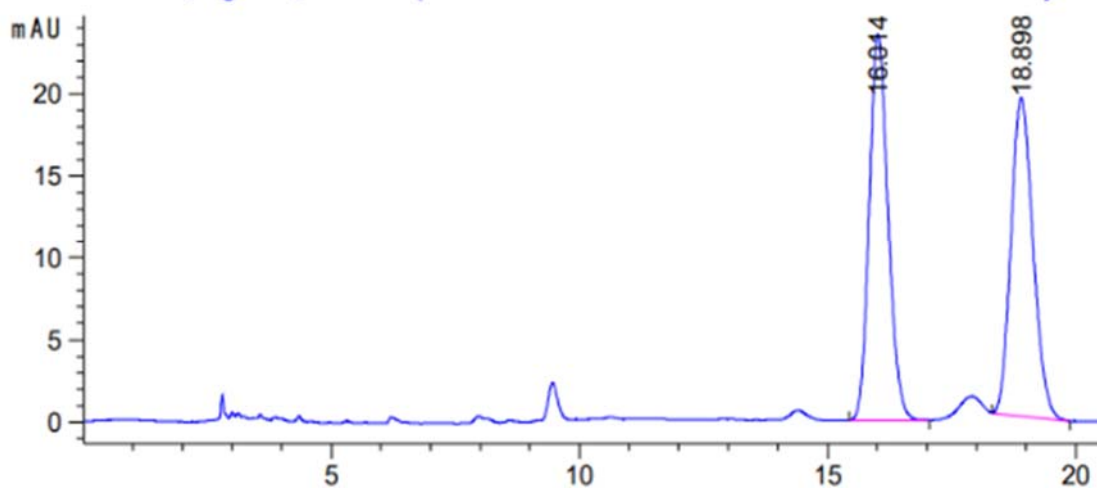

| Peak # | RetTime [min] | Type | Width [min] | Area [mAU*s] | Height [mAU] | Area %  |
|--------|---------------|------|-------------|--------------|--------------|---------|
| 1      | 16.014        | BB   | 0.4054      | 619.01019    | 23.49388     | 50.8779 |
| 2      | 18.898        | BB   | 0.4717      | 597.64850    | 19.38445     | 49.1221 |

### HPLC data using L1

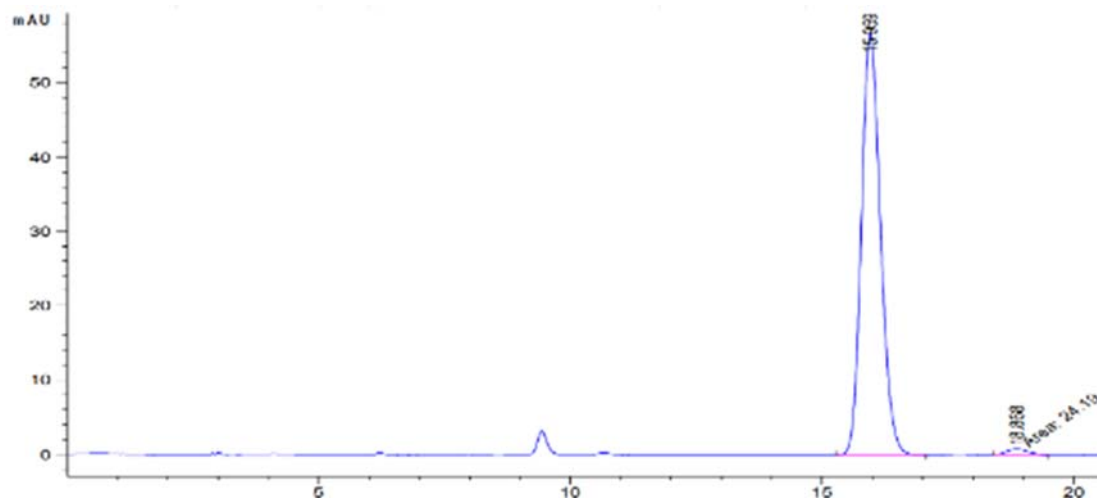

| Peak # | RetTime [min] | Type | Width [min] | Area [mAU*s] | Height [mAU] | Area %  |
|--------|---------------|------|-------------|--------------|--------------|---------|
| 1      | 15.959        | BB   | 0.4052      | 1491.02014   | 56.62566     | 98.4035 |
| 2      | 18.868        | MM   | 0.5096      | 24.19000     | 7.91201e-1   | 1.5965  |



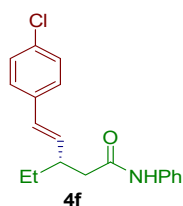

### HPLC data using rac-L1

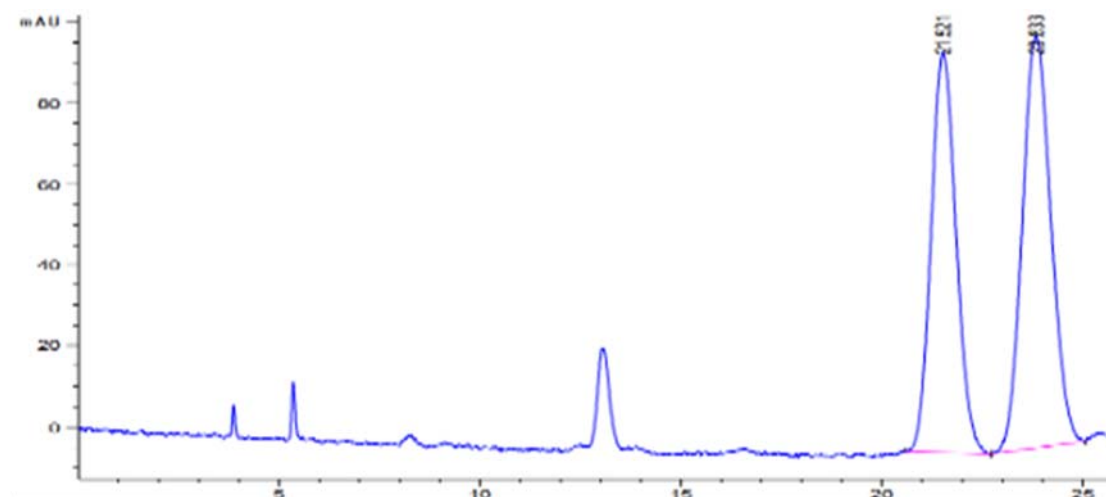

| Peak # | RetTime [min] | Type | Width [min] | Area [mAU*s] | Height [mAU] | Area %  |
|--------|---------------|------|-------------|--------------|--------------|---------|
| 1      | 21.521        | VB R | 0.5517      | 4264.06592   | 98.76539     | 45.9304 |
| 2      | 23.833        | BV R | 0.5899      | 5019.69141   | 101.69619    | 54.0696 |

### HPLC data using L1

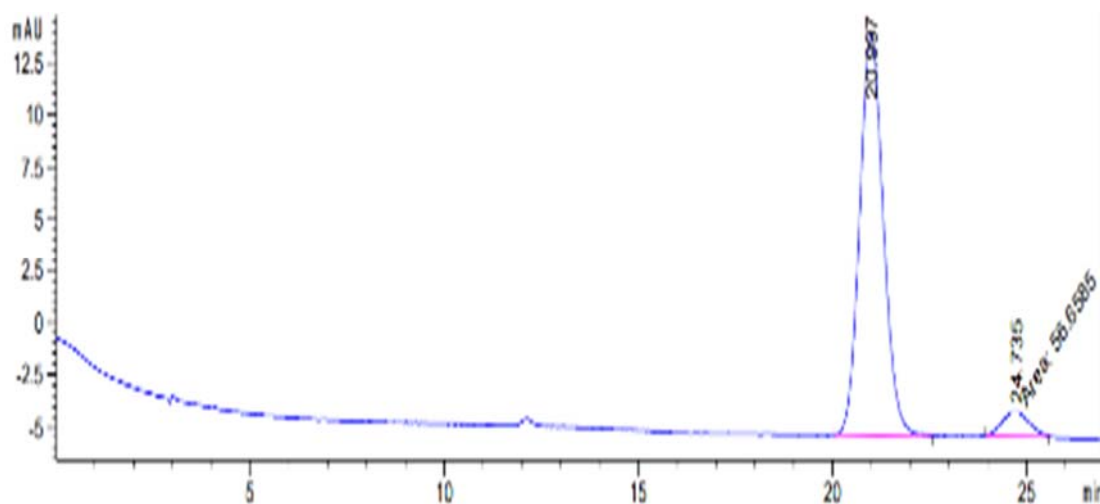

| Peak # | RetTime [min] | Type | Width [min] | Area [mAU*s] | Height [mAU] | Area %  |
|--------|---------------|------|-------------|--------------|--------------|---------|
| 1      | 20.997        | BB   | 0.6288      | 816.76758    | 19.25692     | 93.5131 |
| 2      | 24.735        | MM   | 0.8066      | 56.65855     | 1.17076      | 6.4869  |

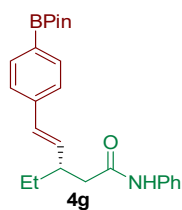

### HPLC data using rac-L1

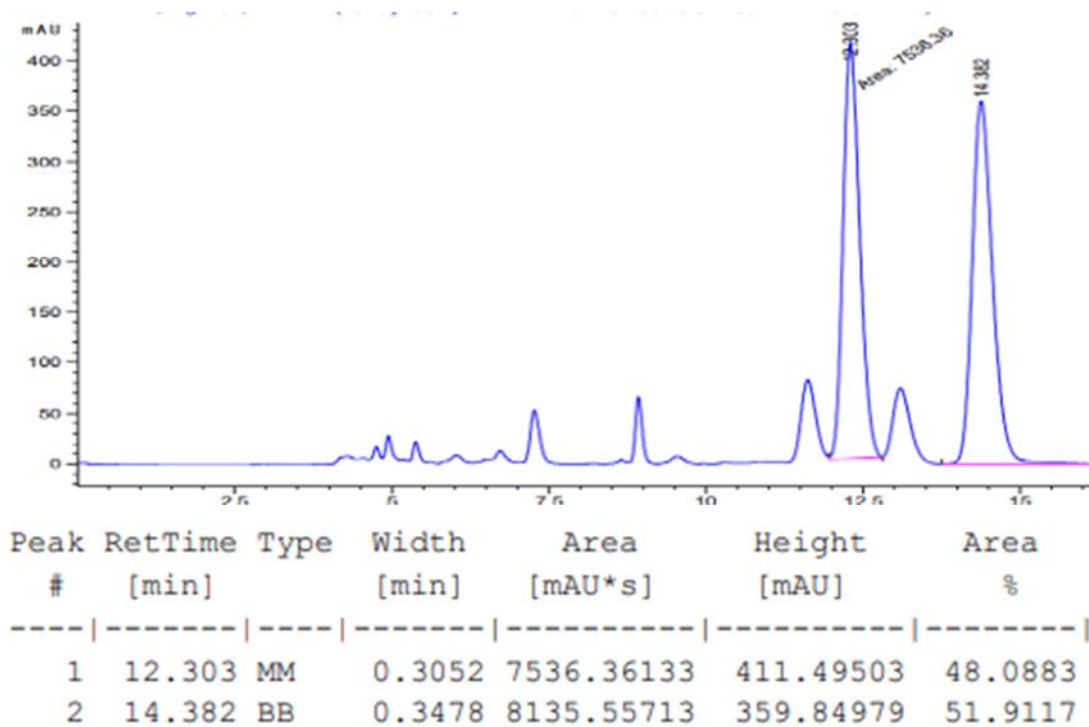

### HPLC data using L1

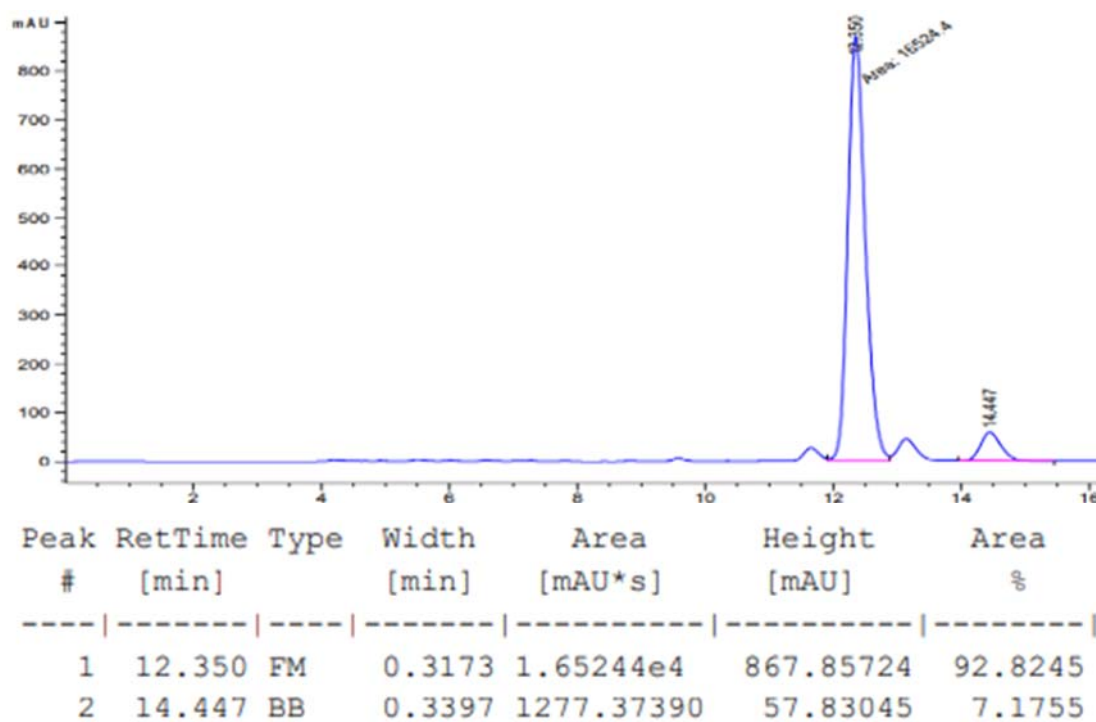

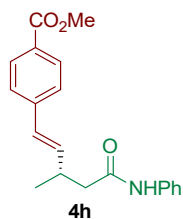

### HPLC data using rac-L1

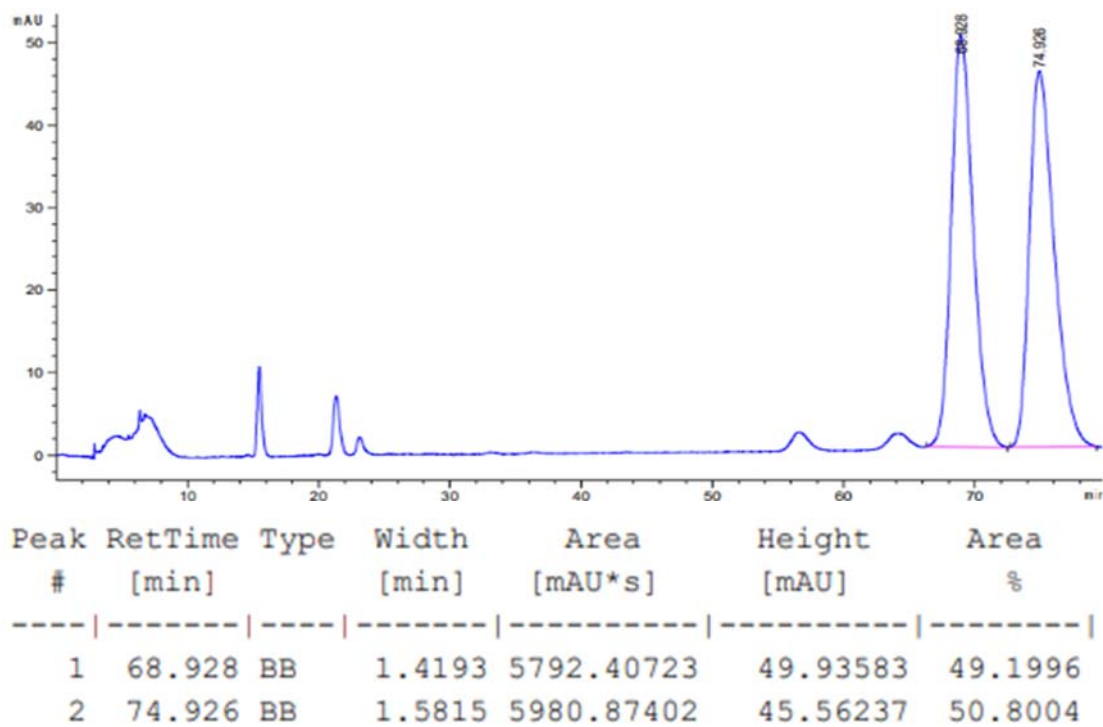

### HPLC data using L1

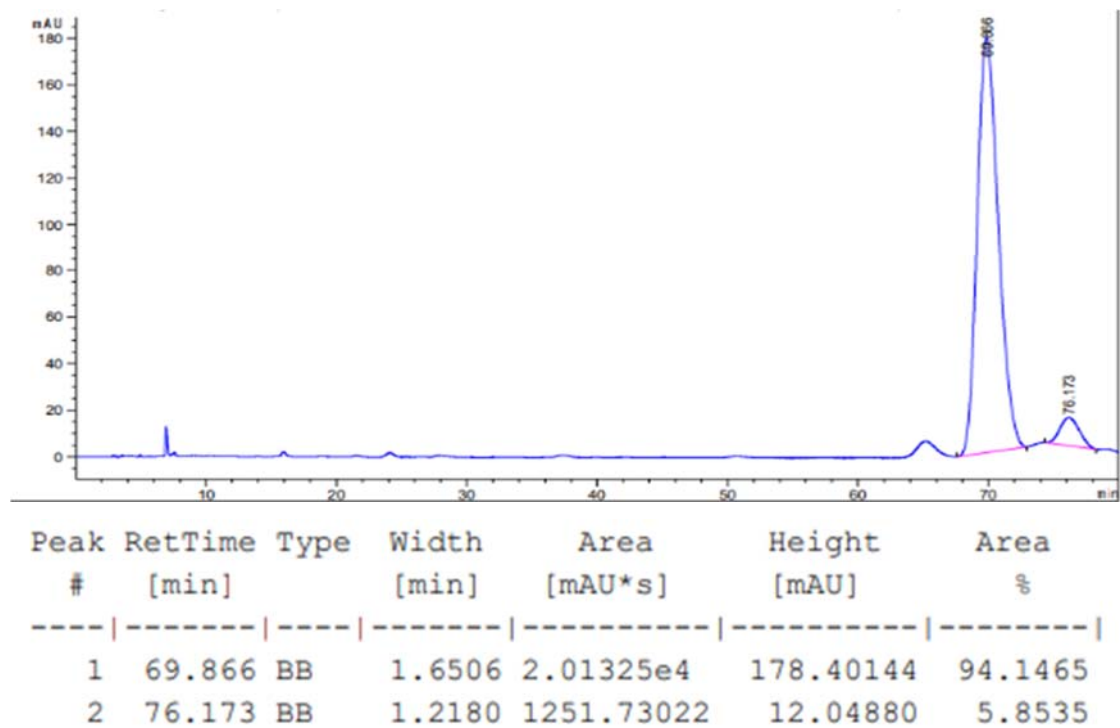

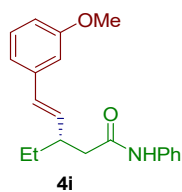

### HPLC data using rac-L1

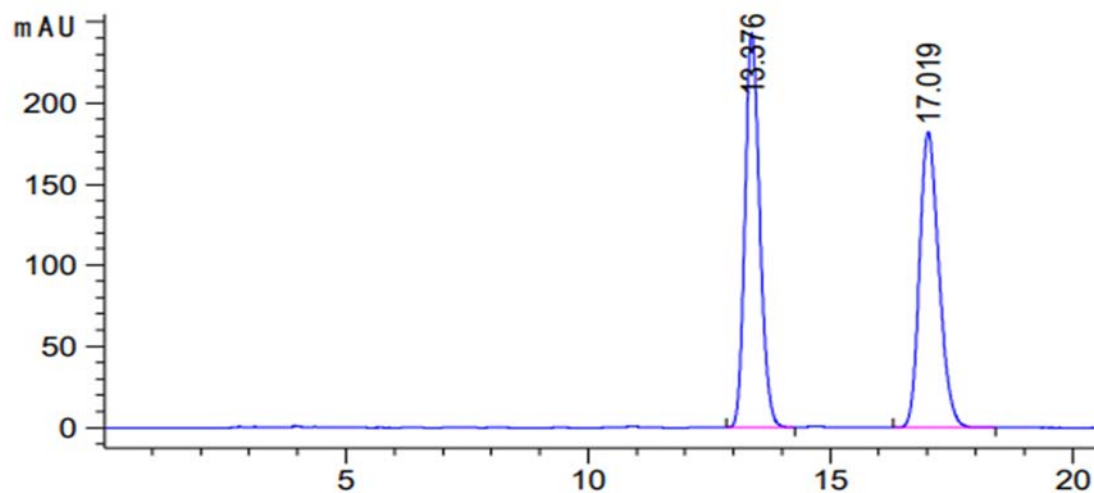

| Peak # | RetTime [min] | Type | Width [min] | Area [mAU*s] | Height [mAU] | Area %  |
|--------|---------------|------|-------------|--------------|--------------|---------|
| 1      | 13.376        | BB   | 0.3274      | 5147.11182   | 242.69609    | 50.4371 |
| 2      | 17.019        | BB   | 0.4297      | 5057.89502   | 182.28032    | 49.5629 |

### HPLC data using L1

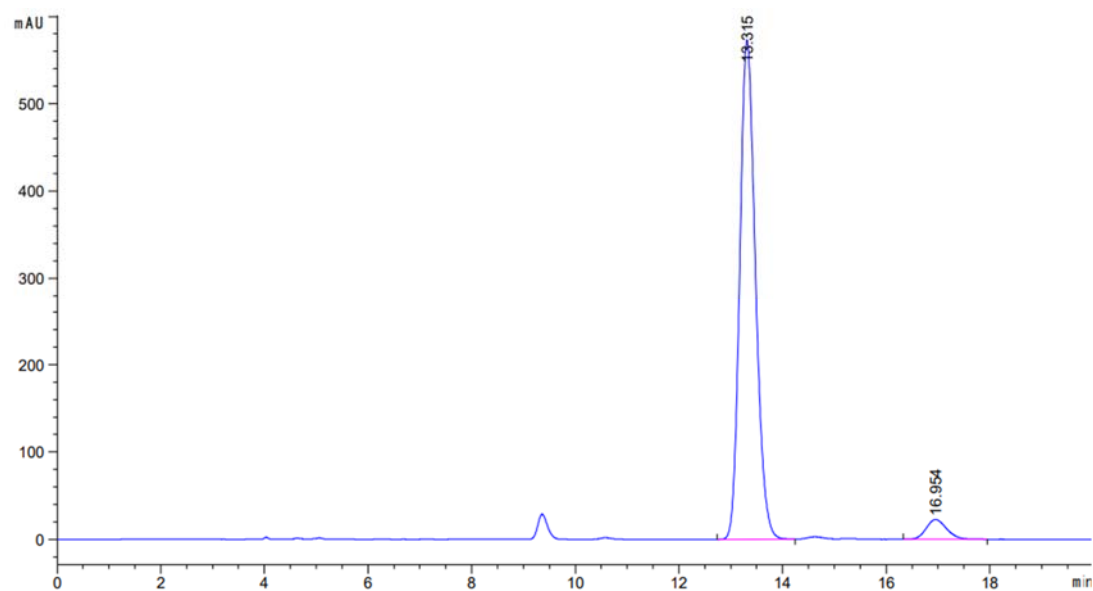

| Peak # | RetTime [min] | Type | Width [min] | Area [mAU*s] | Height [mAU] | Area %  |
|--------|---------------|------|-------------|--------------|--------------|---------|
| 1      | 13.315        | BB   | 0.3231      | 1.20344e4    | 572.84308    | 95.1125 |
| 2      | 16.954        | BB   | 0.4234      | 618.40680    | 22.59113     | 4.8875  |

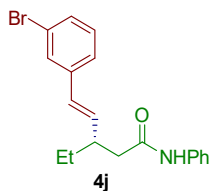

### HPLC data using rac-L1

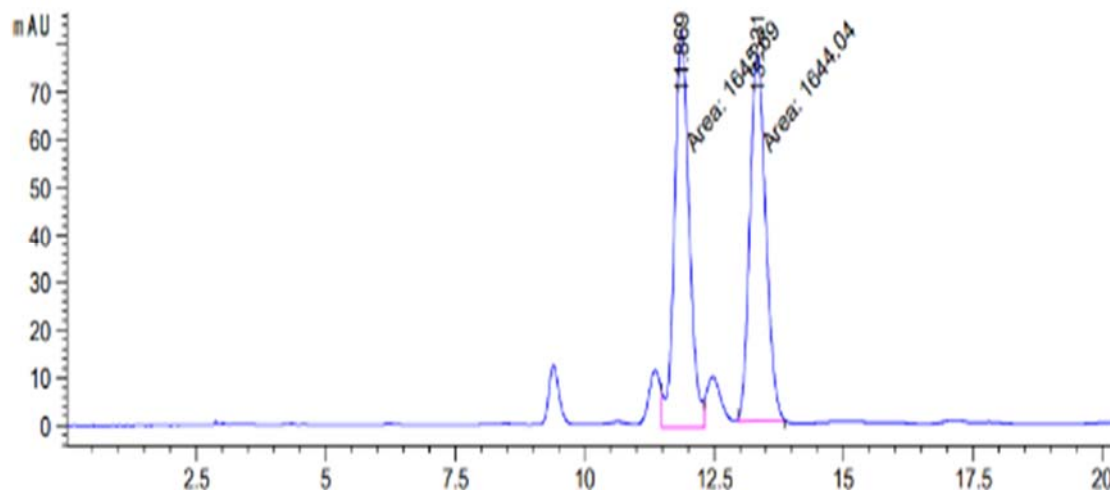

| Peak # | RetTime [min] | Type | Width [min] | Area [mAU*s] | Height [mAU] | Area %  |
|--------|---------------|------|-------------|--------------|--------------|---------|
| 1      | 11.869        | MM   | 0.3298      | 1645.68799   | 83.17652     | 50.0251 |
| 2      | 13.331        | MM   | 0.3542      | 1644.03674   | 77.35761     | 49.9749 |

### HPLC data using L1

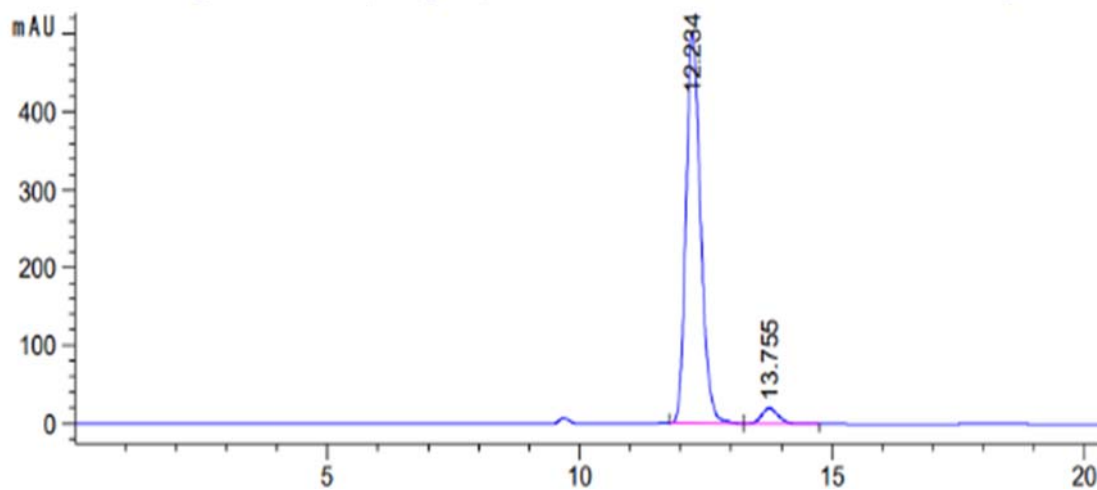

| Peak # | RetTime [min] | Type | Width [min] | Area [mAU*s] | Height [mAU] | Area %  |
|--------|---------------|------|-------------|--------------|--------------|---------|
| 1      | 12.234        | BB   | 0.3081      | 1.00475e4    | 500.67984    | 95.8478 |
| 2      | 13.755        | BB   | 0.3415      | 435.26822    | 19.57161     | 4.1522  |

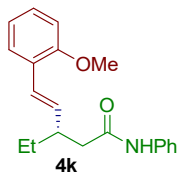

### HPLC data using rac-L1

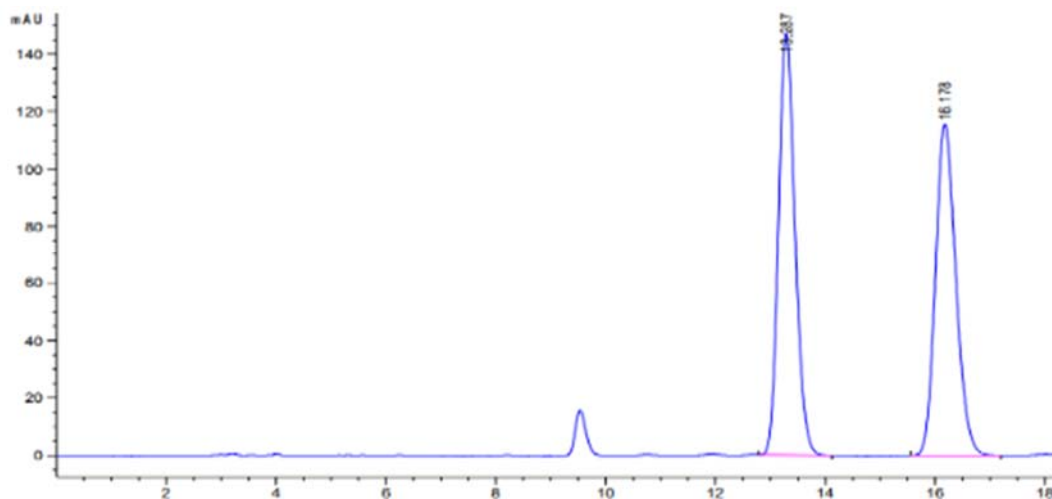

| Peak # | RetTime [min] | Type | Width [min] | Area [mAU*s] | Height [mAU] | Area %  |
|--------|---------------|------|-------------|--------------|--------------|---------|
| 1      | 13.287        | BB   | 0.3218      | 3069.93750   | 146.90334    | 50.7151 |
| 2      | 16.178        | BB   | 0.3972      | 2983.36743   | 115.54459    | 49.2849 |

### HPLC data using L1

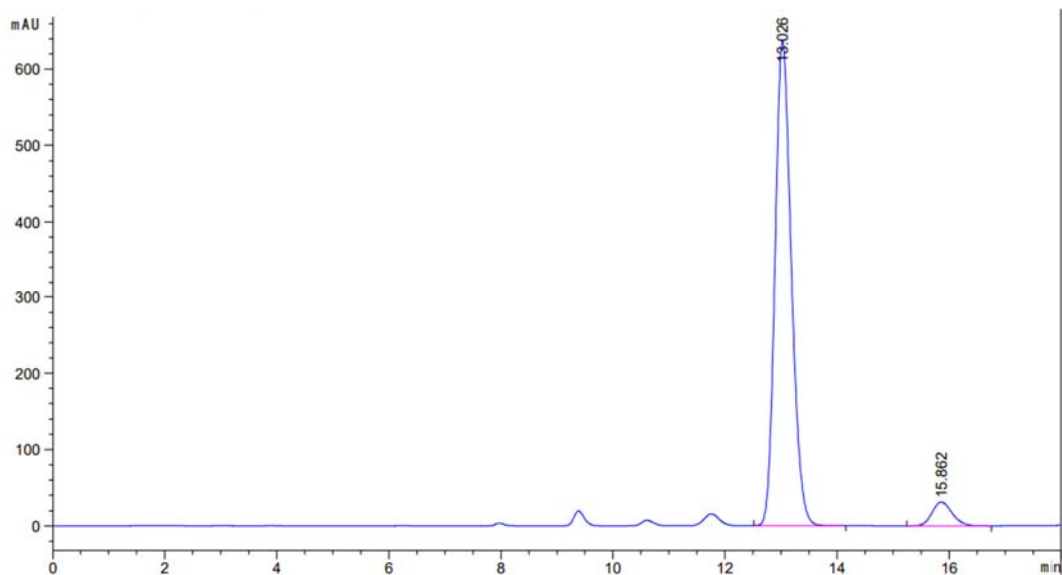

| Peak # | RetTime [min] | Type | Width [min] | Area [mAU*s] | Height [mAU] | Area %  |
|--------|---------------|------|-------------|--------------|--------------|---------|
| 1      | 13.026        | BB   | 0.3112      | 1.28431e4    | 636.93695    | 94.2841 |
| 2      | 15.862        | BB   | 0.3839      | 778.59900    | 31.33191     | 5.7159  |



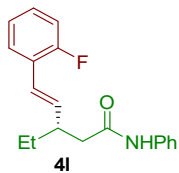

### HPLC data using rac-L1

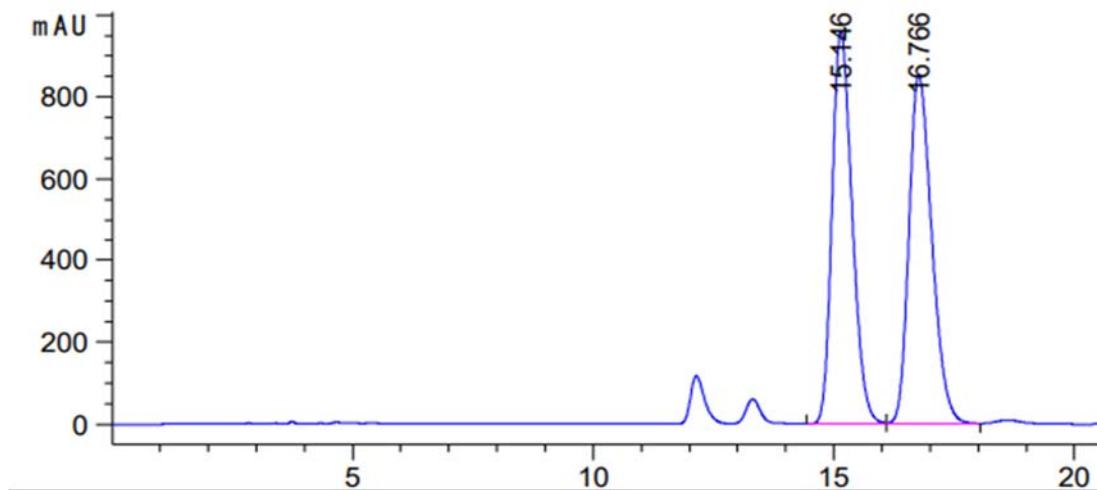

| Peak # | RetTime [min] | Type | Width [min] | Area [mAU*s] | Height [mAU] | Area %  |
|--------|---------------|------|-------------|--------------|--------------|---------|
| 1      | 15.146        | BV   | 0.4476      | 2.77799e4    | 959.87793    | 49.6877 |
| 2      | 16.766        | VB   | 0.5087      | 2.81292e4    | 853.01227    | 50.3123 |

### HPLC data using L1

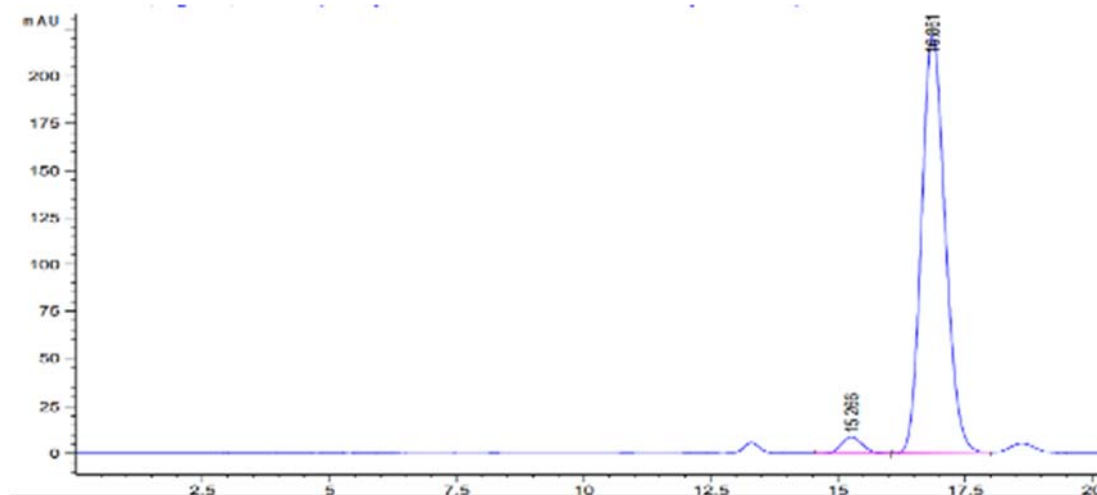

| Peak # | RetTime [min] | Type | Width [min] | Area [mAU*s] | Height [mAU] | Area %  |
|--------|---------------|------|-------------|--------------|--------------|---------|
| 1      | 15.266        | BB   | 0.4405      | 260.63910    | 8.98206      | 3.5164  |
| 2      | 16.861        | BB   | 0.5024      | 7151.48438   | 221.64267    | 96.4836 |

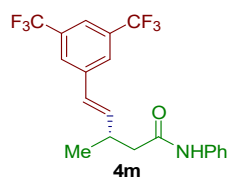

### HPLC data using rac-L1

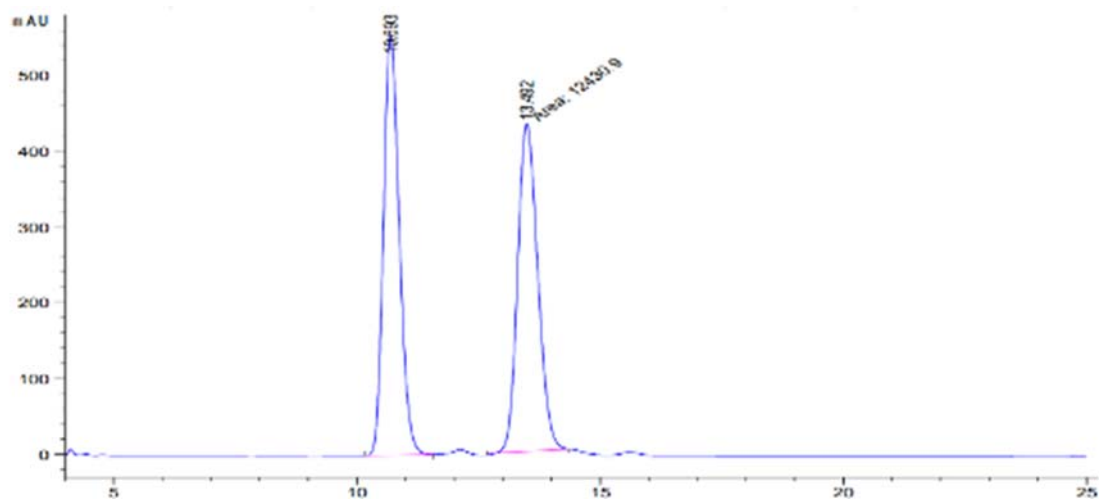

| Peak # | RetTime [min] | Type | Width [min] | Area [mAU*s] | Height [mAU] | Area %  |
|--------|---------------|------|-------------|--------------|--------------|---------|
| 1      | 10.693        | BB   | 0.3502      | 1.25611e4    | 554.75110    | 50.2605 |
| 2      | 13.492        | MM   | 0.4782      | 1.24309e4    | 433.27512    | 49.7395 |

### HPLC data using L1

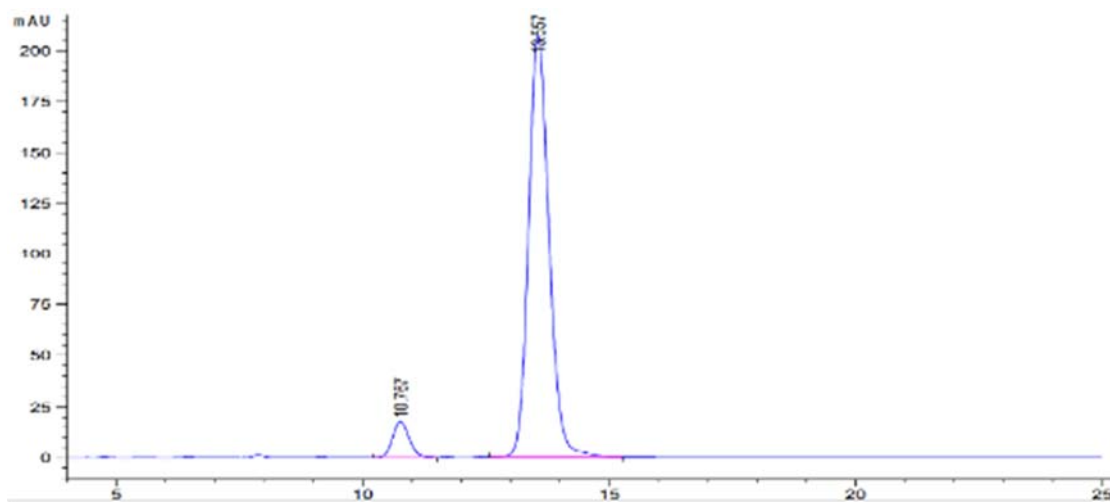

| Peak # | RetTime [min] | Type | Width [min] | Area [mAU*s] | Height [mAU] | Area %  |
|--------|---------------|------|-------------|--------------|--------------|---------|
| 1      | 10.767        | BB   | 0.3590      | 411.02695    | 17.82857     | 6.4185  |
| 2      | 13.557        | BB   | 0.4472      | 5992.78955   | 207.33090    | 93.5815 |



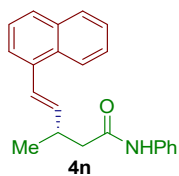

### HPLC data using rac-L1

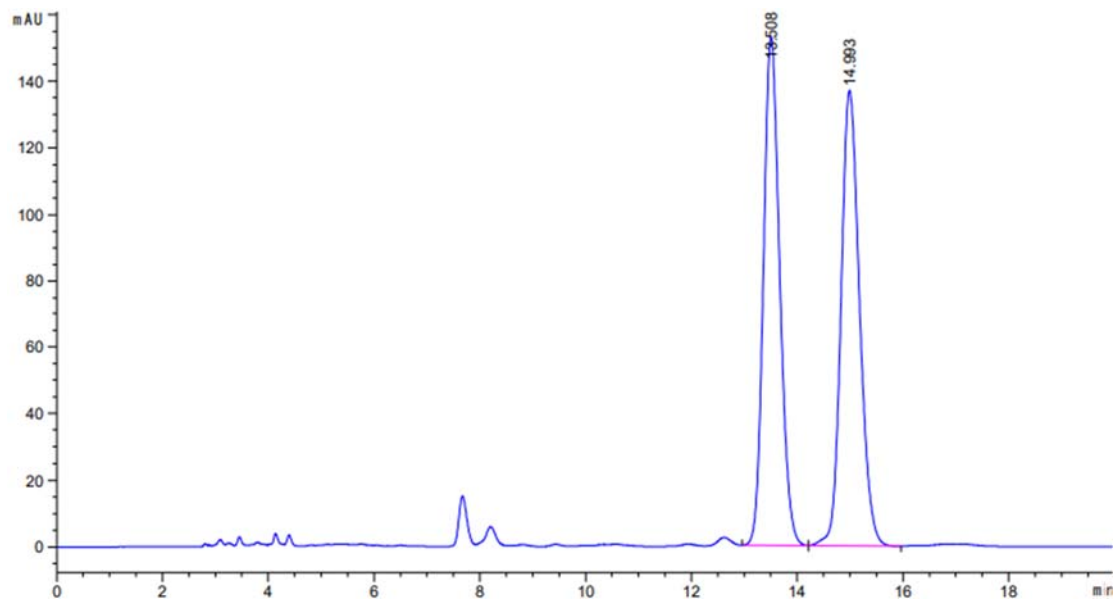

| Peak # | RetTime [min] | Type | Width [min] | Area [mAU*s] | Height [mAU] | Area %  |
|--------|---------------|------|-------------|--------------|--------------|---------|
| 1      | 13.508        | BB   | 0.3286      | 3256.51660   | 152.83232    | 49.5212 |
| 2      | 14.993        | BB   | 0.3729      | 3319.48584   | 136.88239    | 50.4788 |

### HPLC data using L1

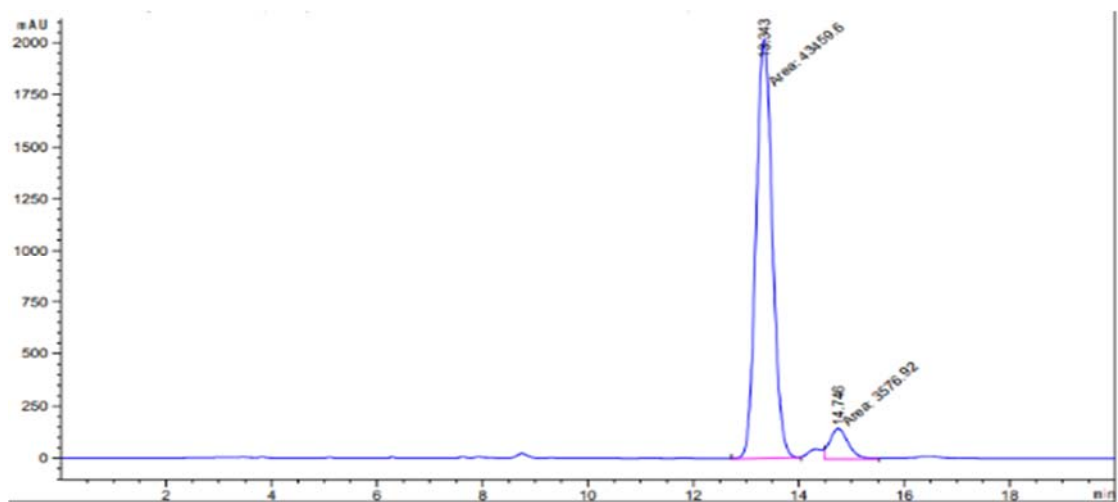

| Peak # | RetTime [min] | Type | Width [min] | Area [mAU*s] | Height [mAU] | Area %  |
|--------|---------------|------|-------------|--------------|--------------|---------|
| 1      | 13.343        | MM   | 0.3590      | 4.34596e4    | 2017.49365   | 92.3954 |
| 2      | 14.746        | MM   | 0.4066      | 3576.92285   | 146.62115    | 7.6046  |

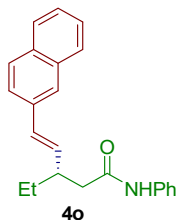

### HPLC data using rac-L1

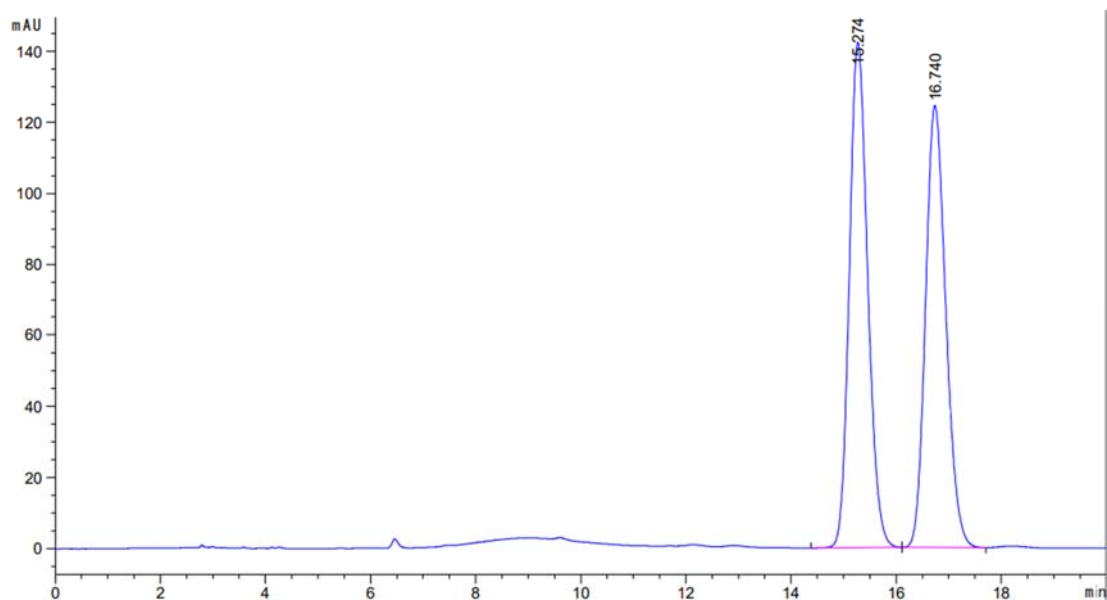

| Peak # | RetTime [min] | Type | Width [min] | Area [mAU*s] | Height [mAU] | Area %  |
|--------|---------------|------|-------------|--------------|--------------|---------|
| 1      | 15.274        | BB   | 0.3743      | 3442.92163   | 142.26883    | 50.8996 |
| 2      | 16.740        | BB   | 0.4135      | 3321.22363   | 124.39402    | 49.1004 |

### HPLC data using L1

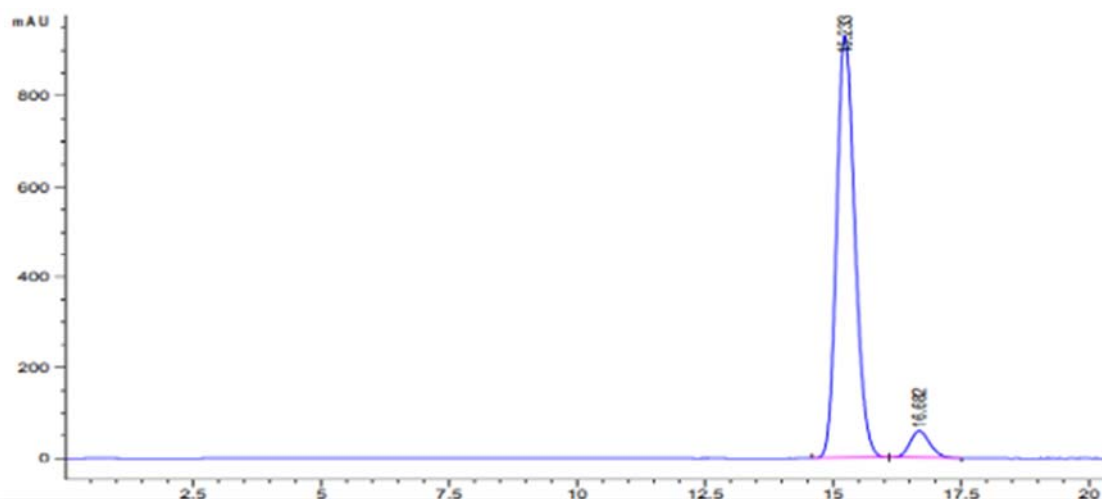

| Peak # | RetTime [min] | Type | Width [min] | Area [mAU*s] | Height [mAU] | Area %  |
|--------|---------------|------|-------------|--------------|--------------|---------|
| 1      | 15.233        | BB   | 0.3829      | 2.30509e4    | 930.88837    | 93.5490 |
| 2      | 16.682        | BB   | 0.4184      | 1589.55383   | 58.98816     | 6.4510  |

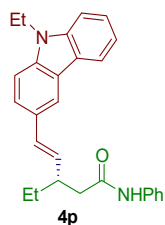

### HPLC data using rac-L1

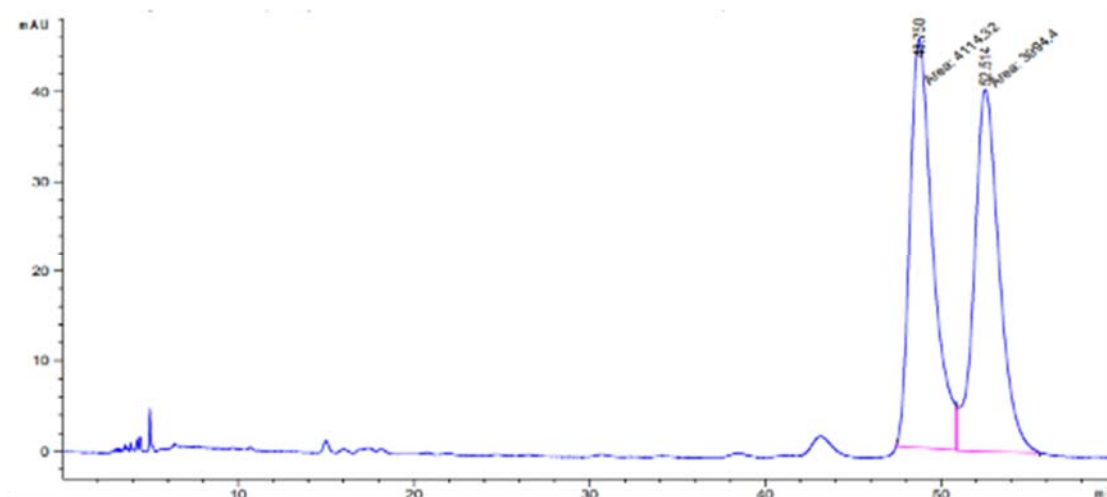

| Peak # | RetTime [min] | Type | Width [min] | Area [mAU*s] | Height [mAU] | Area %  |
|--------|---------------|------|-------------|--------------|--------------|---------|
| 1      | 48.750        | MM   | 1.5086      | 4114.31787   | 45.45294     | 50.7394 |
| 2      | 52.514        | MM   | 1.6542      | 3994.40015   | 40.24456     | 49.2606 |

### HPLC data using L1

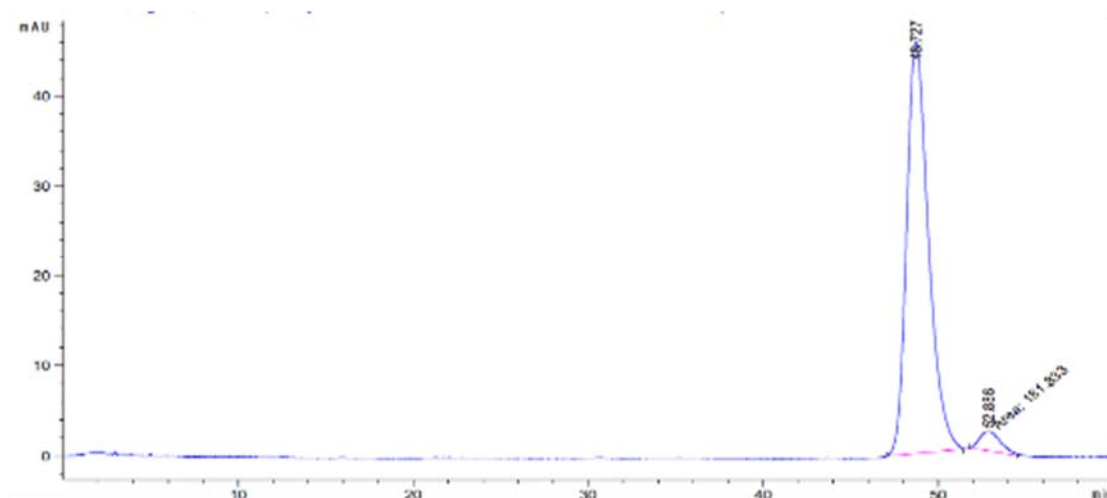

| Peak # | RetTime [min] | Type | Width [min] | Area [mAU*s] | Height [mAU] | Area %  |
|--------|---------------|------|-------------|--------------|--------------|---------|
| 1      | 48.727        | BB   | 1.2415      | 3965.62695   | 45.83137     | 95.6158 |
| 2      | 52.886        | MM   | 1.3884      | 181.83350    | 2.18285      | 4.3842  |

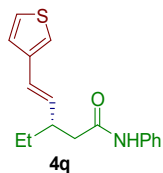

### HPLC data using rac-L1

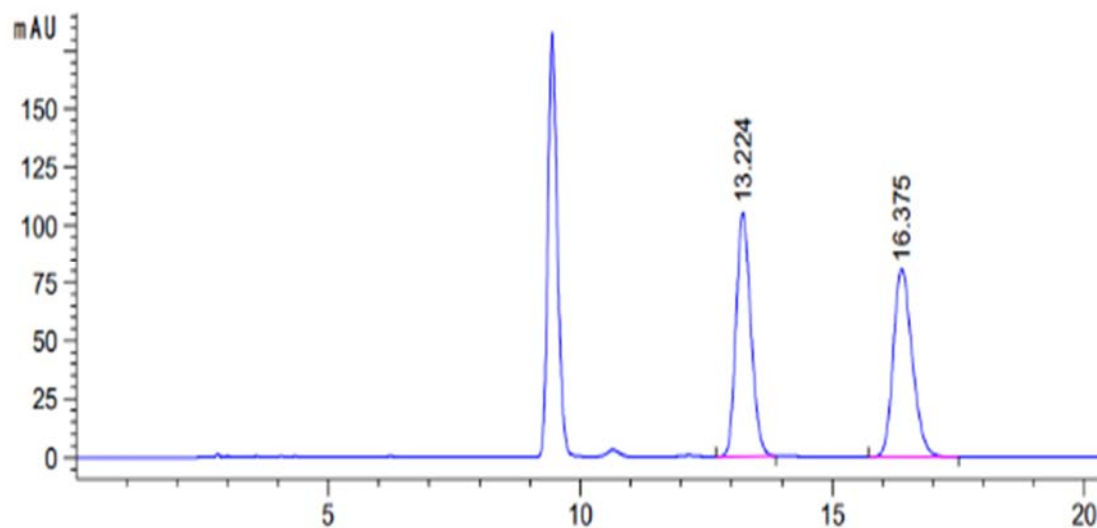

| Peak # | RetTime [min] | Type | Width [min] | Area [mAU*s] | Height [mAU] | Area %  |
|--------|---------------|------|-------------|--------------|--------------|---------|
| 1      | 13.224        | BB   | 0.3126      | 2129.33862   | 105.01877    | 50.3266 |
| 2      | 16.375        | BB   | 0.4001      | 2101.70459   | 80.63589     | 49.6734 |

### HPLC data using L1

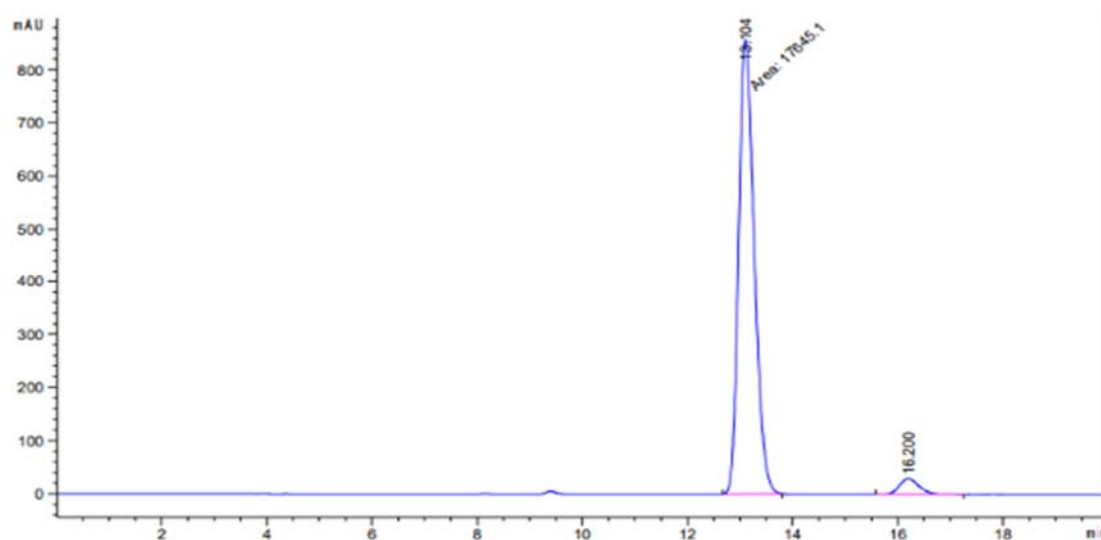

| Peak # | RetTime [min] | Type | Width [min] | Area [mAU*s] | Height [mAU] | Area %  |
|--------|---------------|------|-------------|--------------|--------------|---------|
| 1      | 13.104        | MM   | 0.3434      | 1.76451e4    | 856.40411    | 95.9371 |
| 2      | 16.200        | BB   | 0.3947      | 747.26495    | 29.19026     | 4.0629  |

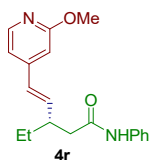

### HPLC data using rac-L1

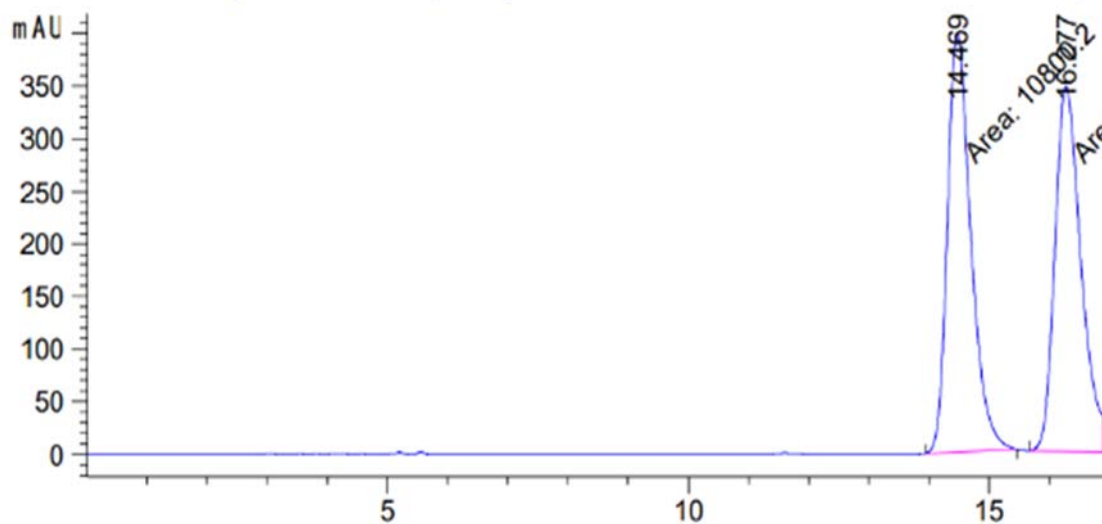

| Peak # | RetTime [min] | Type | Width [min] | Area [mAU*s] | Height [mAU] | Area %  |
|--------|---------------|------|-------------|--------------|--------------|---------|
| 1      | 14.469        | MM   | 0.4532      | 1.08002e4    | 397.16122    | 50.8509 |
| 2      | 16.277        | MM   | 0.5025      | 1.04388e4    | 346.22037    | 49.1491 |

### HPLC data using L1

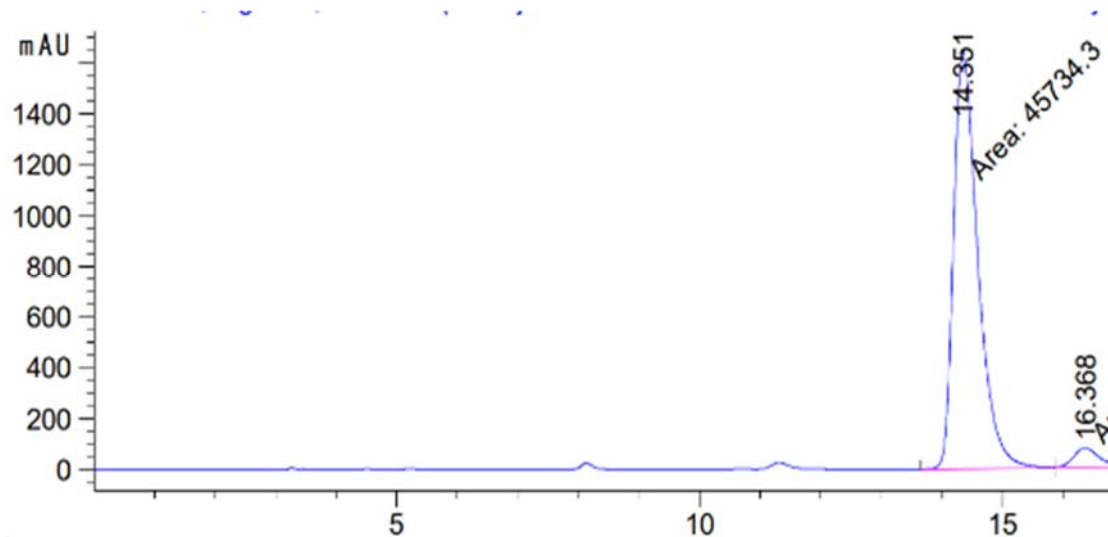

| Peak # | RetTime [min] | Type | Width [min] | Area [mAU*s] | Height [mAU] | Area %  |
|--------|---------------|------|-------------|--------------|--------------|---------|
| 1      | 14.351        | MM   | 0.4639      | 4.57343e4    | 1643.26831   | 95.3211 |
| 2      | 16.368        | MM   | 0.4879      | 2244.90503   | 76.68397     | 4.6789  |

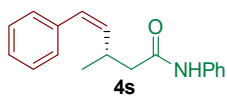

### HPLC data using rac-L1

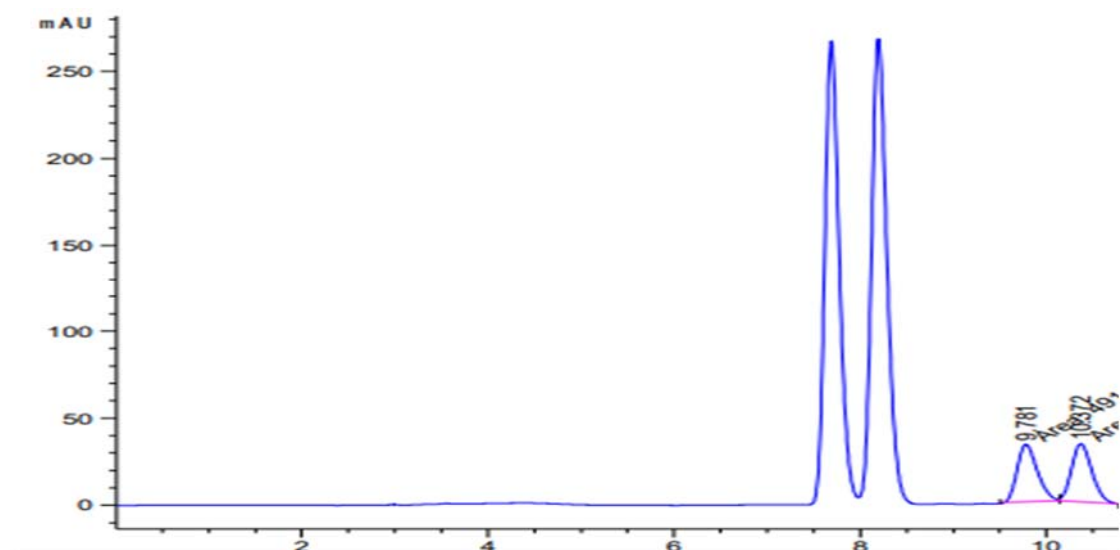

| Peak # | RetTime [min] | Type | Width [min] | Area [mAU*s] | Height [mAU] | Area %  |
|--------|---------------|------|-------------|--------------|--------------|---------|
| 1      | 9.781         | MM   | 0.2488      | 491.83655    | 32.94780     | 49.6161 |
| 2      | 10.372        | MM   | 0.2502      | 499.44687    | 33.26496     | 50.3839 |

### HPLC data using L1

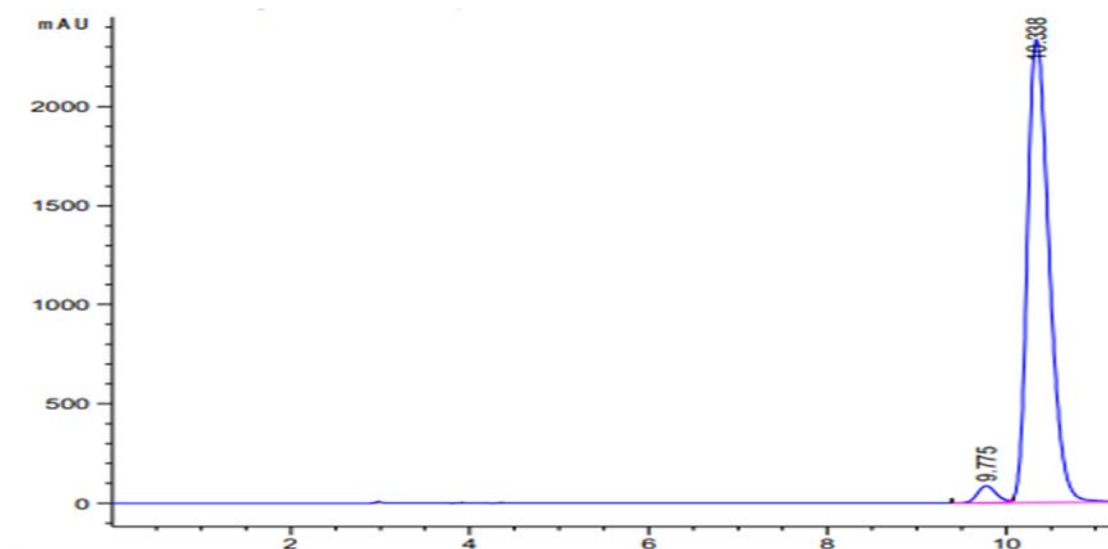

| Peak # | RetTime [min] | Type | Width [min] | Area [mAU*s] | Height [mAU] | Area %  |
|--------|---------------|------|-------------|--------------|--------------|---------|
| 1      | 9.775         | BV E | 0.2244      | 1253.56628   | 85.82412     | 3.0706  |
| 2      | 10.338        | VB R | 0.2640      | 3.95713e4    | 2331.97681   | 96.9294 |



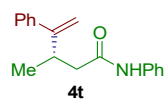

# HPLC data using rac-L1

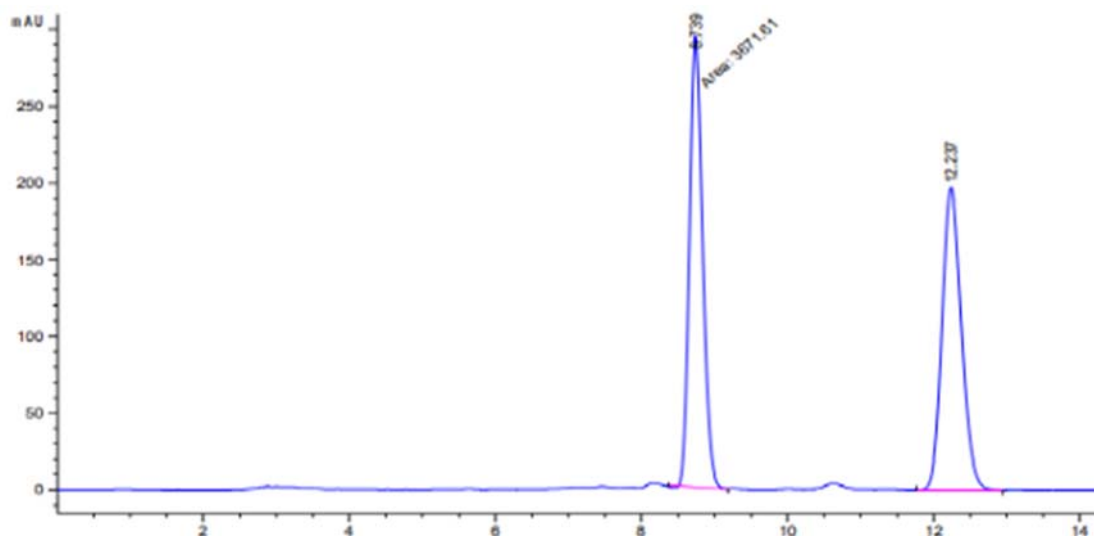

| Peak # | RetTime [min] | Type | Width [min] | Area [mAU*s] | Height [mAU] | Area %  |
|--------|---------------|------|-------------|--------------|--------------|---------|
| 1      | 8.739         | MM   | 0.2086      | 3671.61377   | 293.38538    | 50.2478 |
| 2      | 12.237        | BB   | 0.2849      | 3635.40332   | 197.36060    | 49.7522 |

# HPLC data using L1

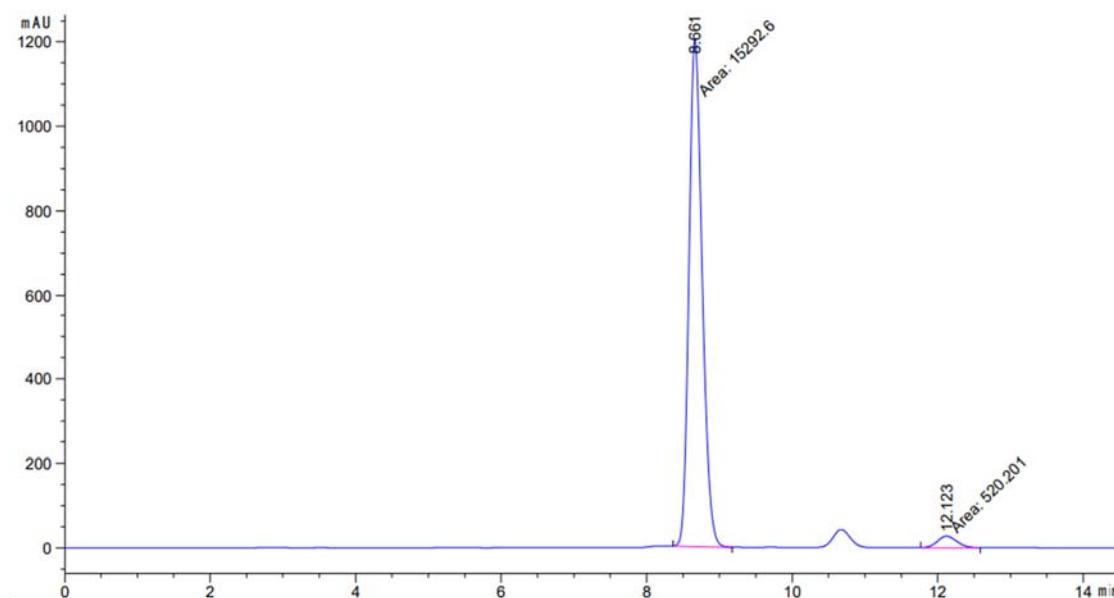

| Peak # | RetTime [min] | Type | Width [min] | Area [mAU*s] | Height [mAU] | Area %  |
|--------|---------------|------|-------------|--------------|--------------|---------|
| 1      | 8.661         | MM   | 0.2120      | 1.52926e4    | 1202.25500   | 96.7102 |
| 2      | 12.123        | MM   | 0.3115      | 520.20117    | 27.83016     | 3.2898  |

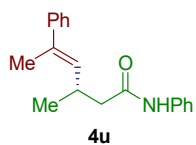

### HPLC data using rac-L1

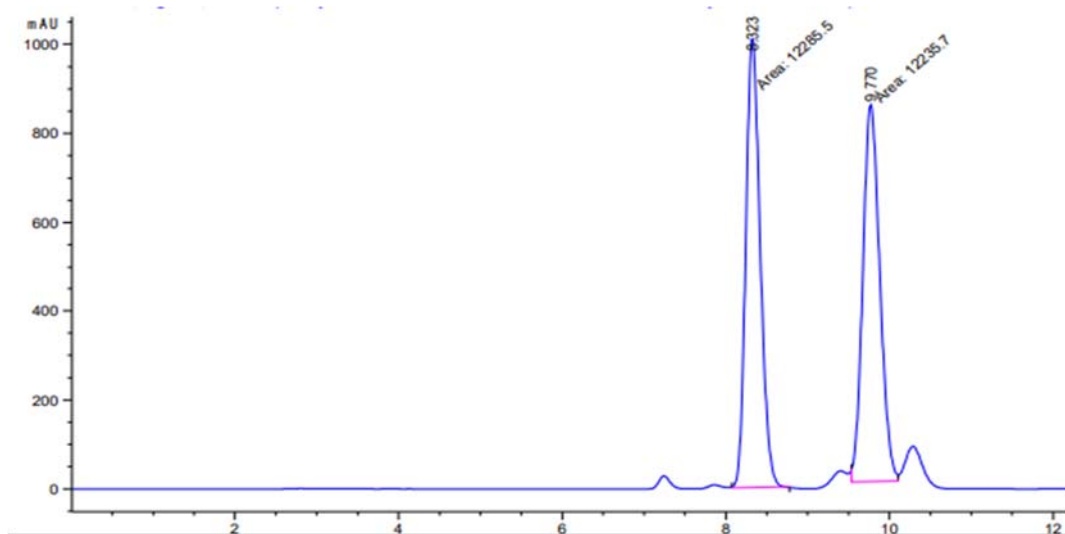

| Peak # | RetTime [min] | Type | Width [min] | Area [mAU*s] | Height [mAU] | Area %  |
|--------|---------------|------|-------------|--------------|--------------|---------|
| 1      | 8.323         | MM   | 0.2030      | 1.22855e4    | 1008.77563   | 50.1014 |
| 2      | 9.770         | MM   | 0.2406      | 1.22357e4    | 847.73724    | 49.8986 |

### HPLC data using L1

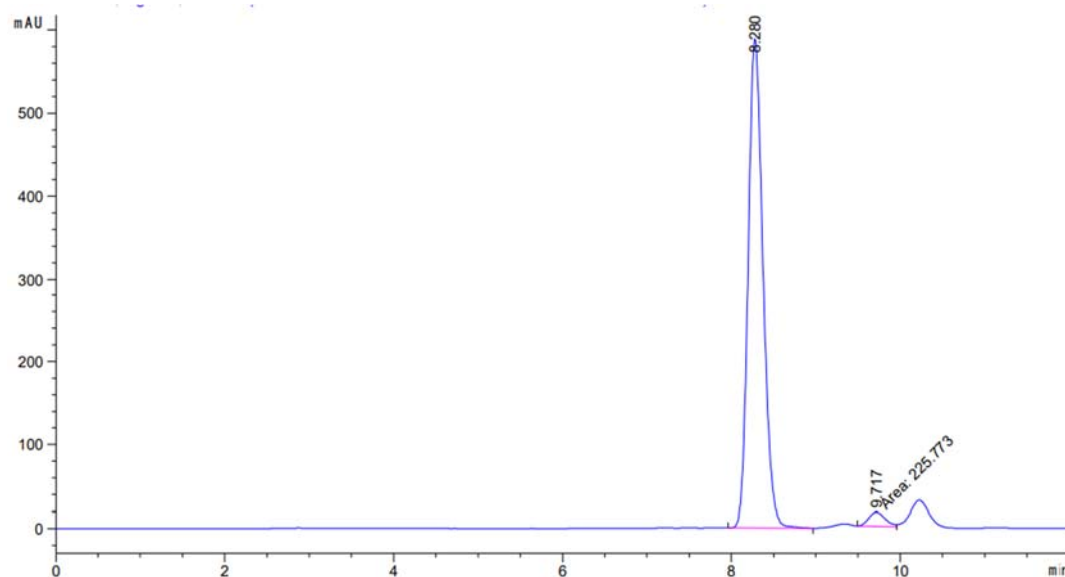

| Peak # | RetTime [min] | Type | Width [min] | Area [mAU*s] | Height [mAU] | Area %  |
|--------|---------------|------|-------------|--------------|--------------|---------|
| 1      | 8.280         | BB   | 0.1879      | 7153.40186   | 588.33716    | 96.9404 |
| 2      | 9.717         | MM   | 0.2259      | 225.77325    | 16.65383     | 3.0596  |



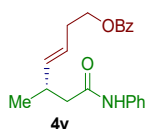

# HPLC data using rac-L1

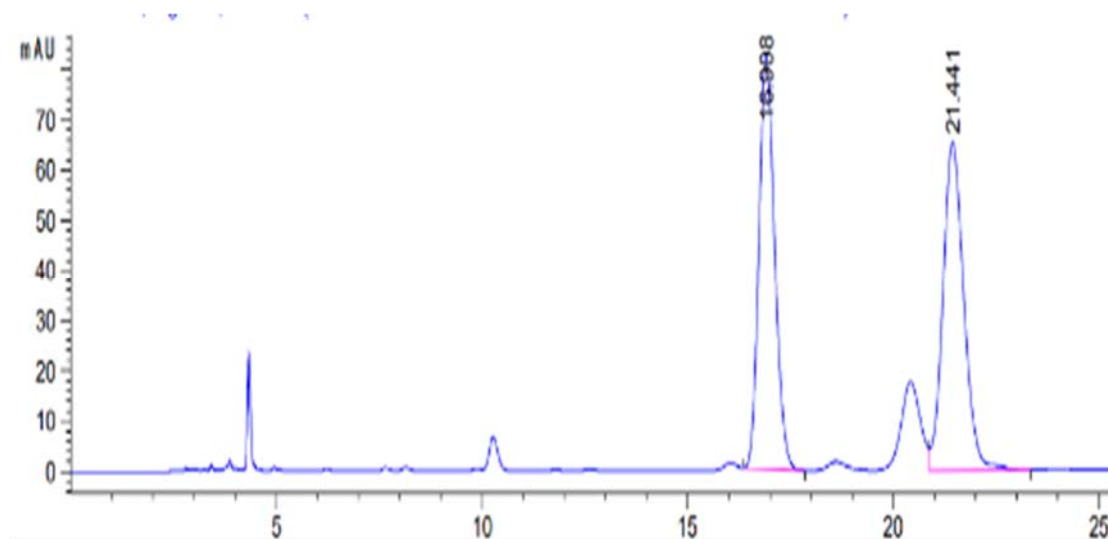

| Peak # | RetTime [min] | Type | Width [min] | Area [mAU*s] | Height [mAU] | Area %  |
|--------|---------------|------|-------------|--------------|--------------|---------|
| 1      | 16.908        | BB   | 0.4107      | 2190.93066   | 82.27848     | 48.7534 |
| 2      | 21.441        | VB   | 0.5401      | 2302.97021   | 65.19888     | 51.2466 |

# HPLC data using L1

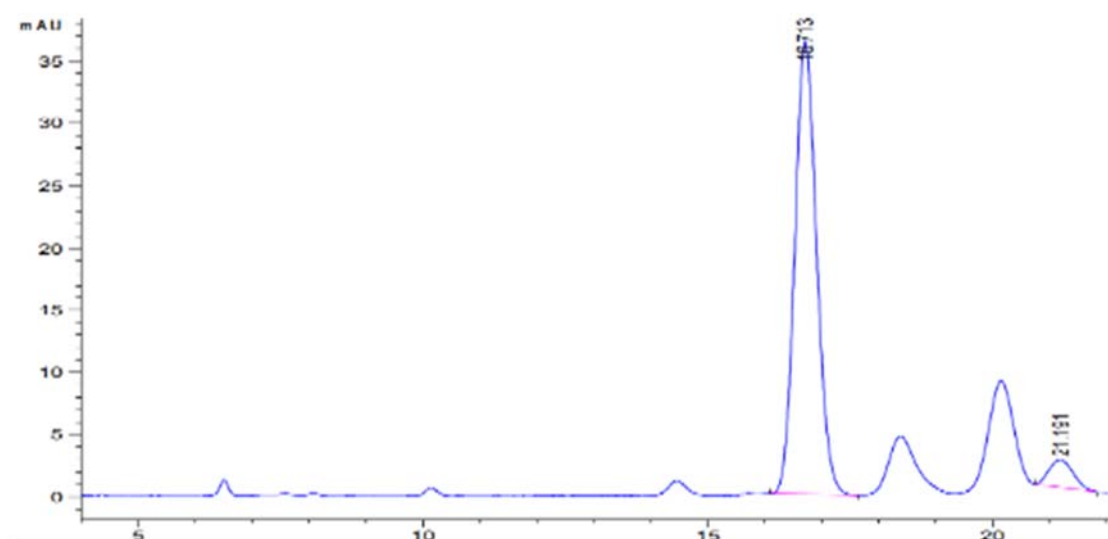

| Peak # | RetTime [min] | Type | Width [min] | Area [mAU*s] | Height [mAU] | Area %  |
|--------|---------------|------|-------------|--------------|--------------|---------|
| 1      | 16.713        | BB   | 0.4145      | 967.07593    | 36.33714     | 93.7120 |
| 2      | 21.191        | BB   | 0.3785      | 64.89010     | 2.21005      | 6.2880  |

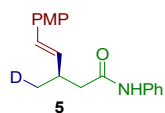

### HPLC data using rac-L1

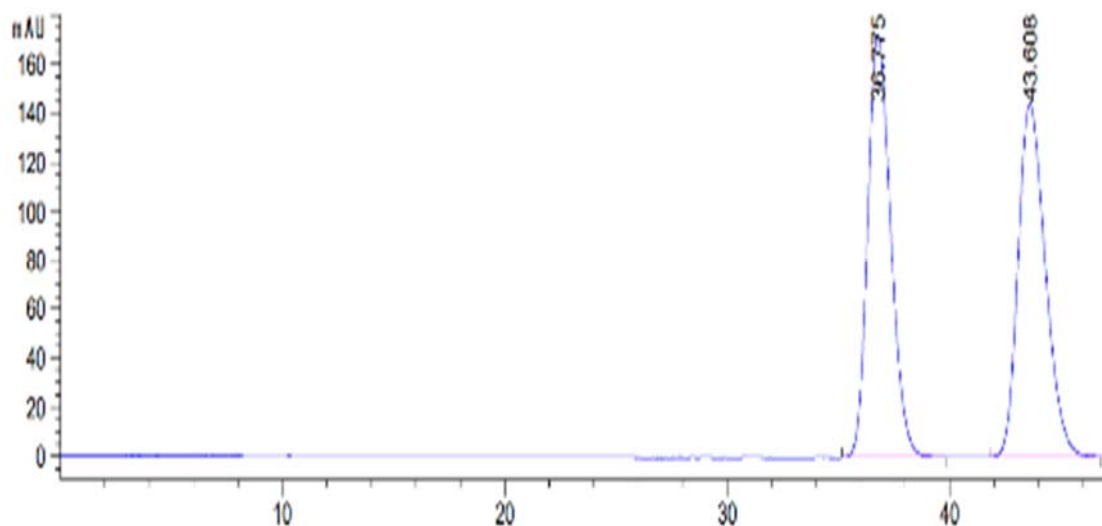

| Peak # | RetTime [min] | Type | Width [min] | Area [mAU*s] | Height [mAU] | Area %  |
|--------|---------------|------|-------------|--------------|--------------|---------|
| 1      | 36.775        | BB   | 1.0691      | 1.23655e4    | 172.32986    | 50.1251 |
| 2      | 43.608        | BB   | 1.2509      | 1.23038e4    | 143.99590    | 49.8749 |

### HPLC data using L1

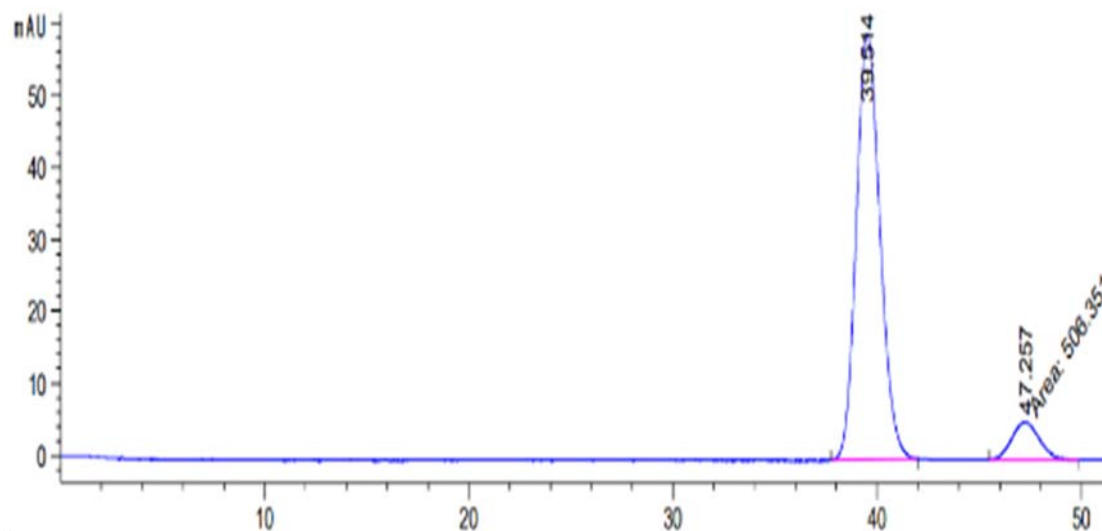

| Peak # | RetTime [min] | Type | Width [min] | Area [mAU*s] | Height [mAU] | Area %  |
|--------|---------------|------|-------------|--------------|--------------|---------|
| 1      | 39.514        | BB   | 1.1706      | 4752.14746   | 59.06883     | 90.3708 |
| 2      | 47.257        | MM   | 1.6034      | 506.35052    | 5.26343      | 9.6292  |

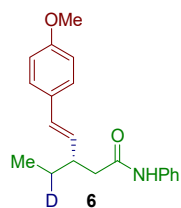

### HPLC data using rac-L1

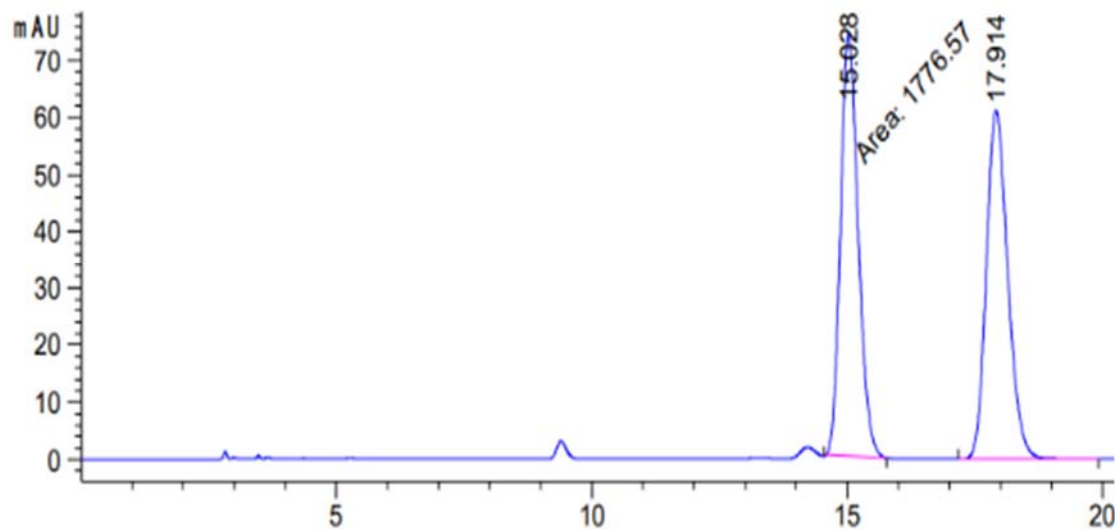

| Peak # | RetTime [min] | Type | Width [min] | Area [mAU*s] | Height [mAU] | Area %  |
|--------|---------------|------|-------------|--------------|--------------|---------|
| 1      | 15.028        | MM   | 0.3985      | 1776.57129   | 74.30415     | 49.8469 |
| 2      | 17.914        | BB   | 0.4489      | 1787.48767   | 61.16855     | 50.1531 |

### HPLC data using L1

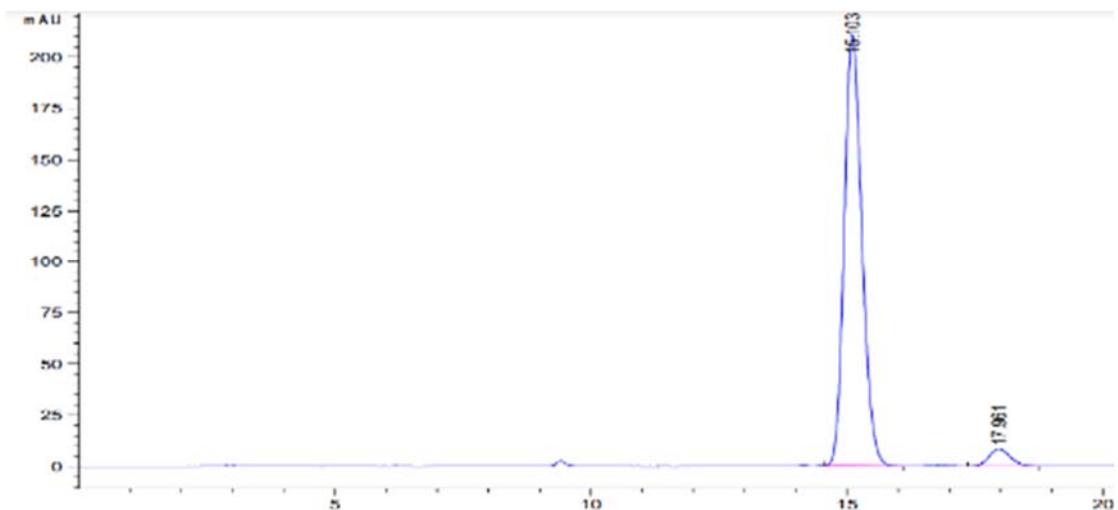

| Peak # | RetTime [min] | Type | Width [min] | Area [mAU*s] | Height [mAU] | Area %  |
|--------|---------------|------|-------------|--------------|--------------|---------|
| 1      | 15.103        | BB   | 0.3694      | 5042.65283   | 210.52457    | 95.3798 |
| 2      | 17.961        | BB   | 0.4240      | 244.26556    | 8.43241      | 4.6202  |

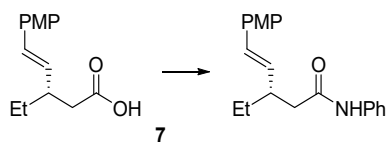

HPLC data using rac-L1

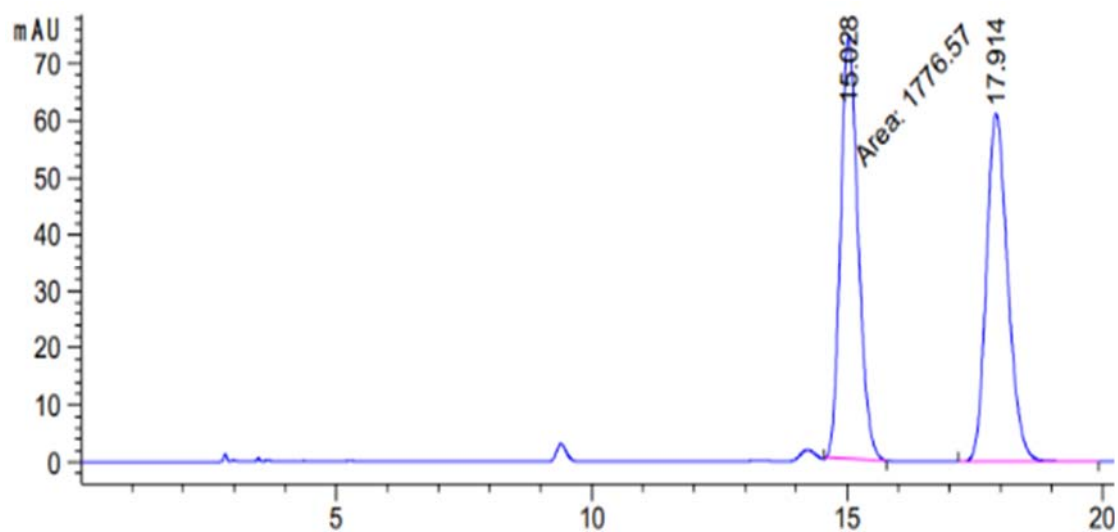

| Peak # | RetTime [min] | Type | Width [min] | Area [mAU*s] | Height [mAU] | Area %  |
|--------|---------------|------|-------------|--------------|--------------|---------|
| 1      | 15.028        | MM   | 0.3985      | 1776.57129   | 74.30415     | 49.8469 |
| 2      | 17.914        | BB   | 0.4489      | 1787.48767   | 61.16855     | 50.1531 |

HPLC data using L1

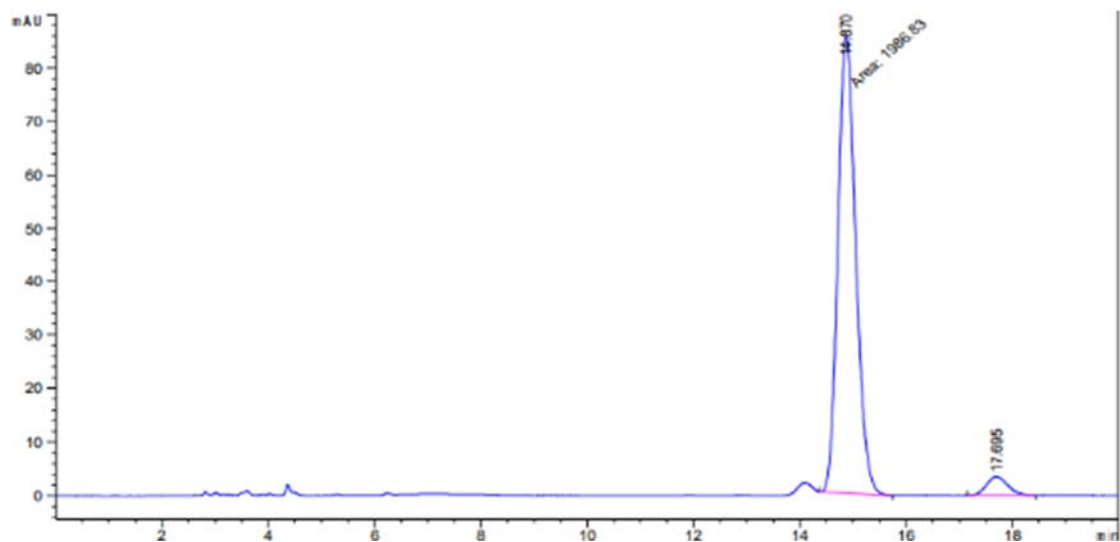

| Peak # | RetTime [min] | Type | Width [min] | Area [mAU*s] | Height [mAU] | Area %  |
|--------|---------------|------|-------------|--------------|--------------|---------|
| 1      | 14.870        | MM   | 0.3879      | 1986.83167   | 85.36097     | 95.3408 |
| 2      | 17.695        | BB   | 0.4143      | 97.09464     | 3.49297      | 4.6592  |

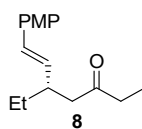

HPLC data using rac-L1

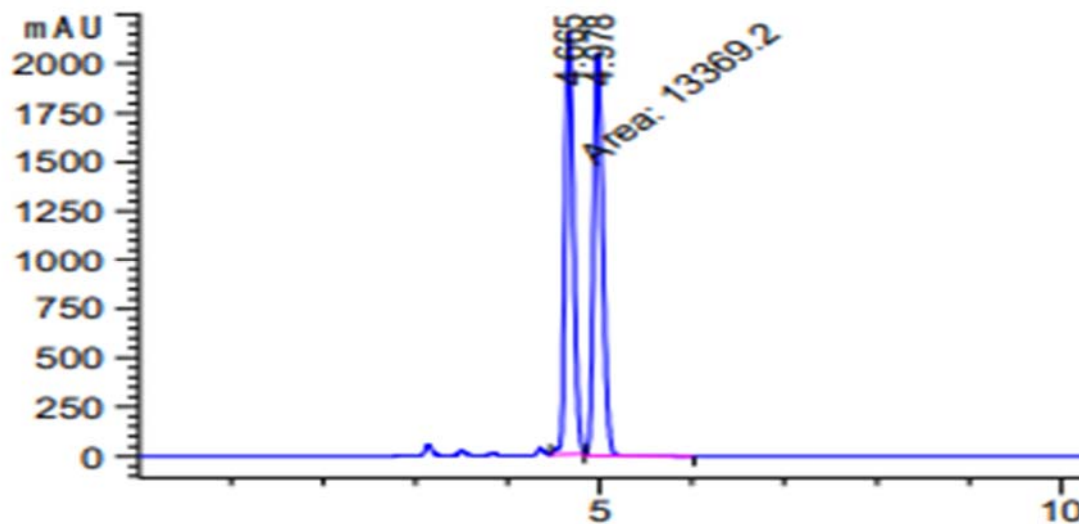

| Peak # | RetTime [min] | Type | Width [min] | Area [mAU*s] | Height [mAU] | Area %  |
|--------|---------------|------|-------------|--------------|--------------|---------|
| 1      | 4.665         | MM   | 0.1037      | 1.33692e4    | 2149.03027   | 49.4716 |
| 2      | 4.978         | VB   | 0.1034      | 1.36548e4    | 2057.75488   | 50.5284 |

HPLC data using L1

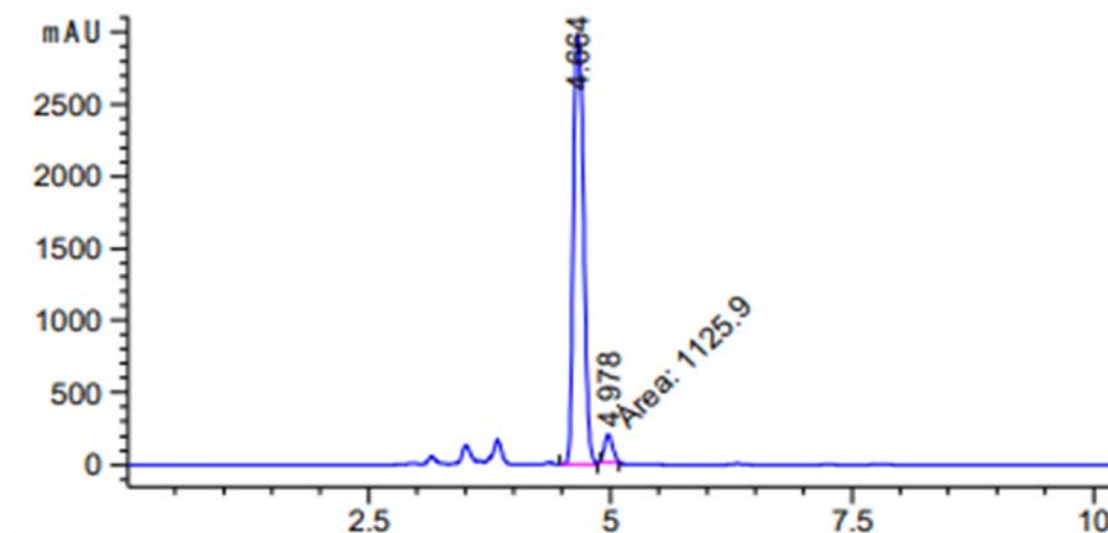

| Peak # | RetTime [min] | Type | Width [min] | Area [mAU*s] | Height [mAU] | Area %  |
|--------|---------------|------|-------------|--------------|--------------|---------|
| 1      | 4.664         | BV   | 0.1185      | 2.19687e4    | 2961.44995   | 95.1248 |
| 2      | 4.978         | MM   | 0.0965      | 1125.90076   | 194.41954    | 4.8752  |

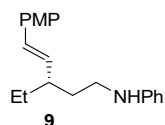

# HPLC data using rac-L1

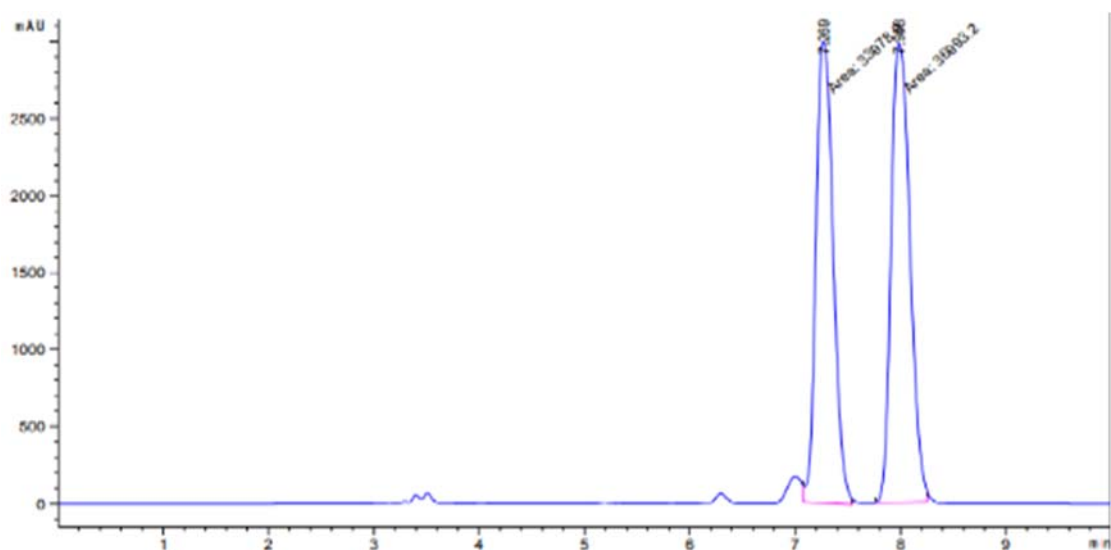

| Peak # | RetTime [min] | Type | Width [min] | Area [mAU*s] | Height [mAU] | Area %  |
|--------|---------------|------|-------------|--------------|--------------|---------|
| 1      | 7.269         | MM   | 0.1892      | 3.39788e4    | 2992.93701   | 47.8763 |
| 2      | 7.988         | MM   | 0.2071      | 3.69932e4    | 2976.55273   | 52.1237 |

# HPLC data using L1

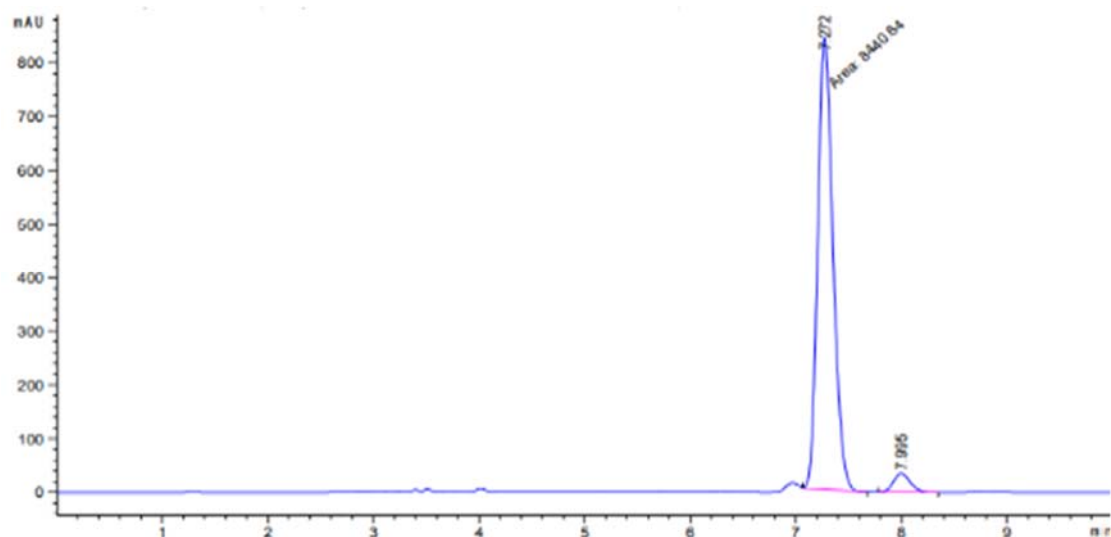

| Peak # | RetTime [min] | Type | Width [min] | Area [mAU*s] | Height [mAU] | Area %  |
|--------|---------------|------|-------------|--------------|--------------|---------|
| 1      | 7.272         | MM   | 0.1672      | 8440.64355   | 841.51349    | 95.7080 |
| 2      | 7.995         | BB   | 0.1673      | 378.51392    | 34.68337     | 4.2920  |



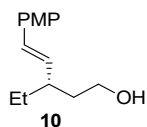

### HPLC data using rac-L1

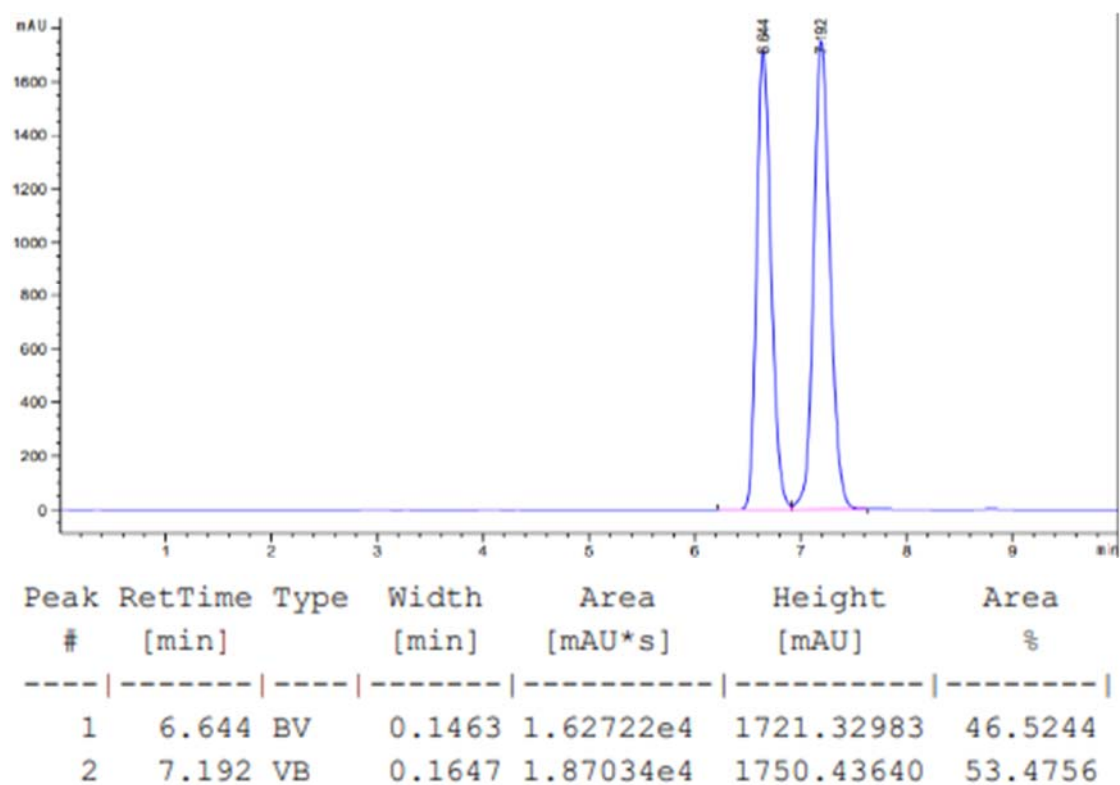

### HPLC data using L1

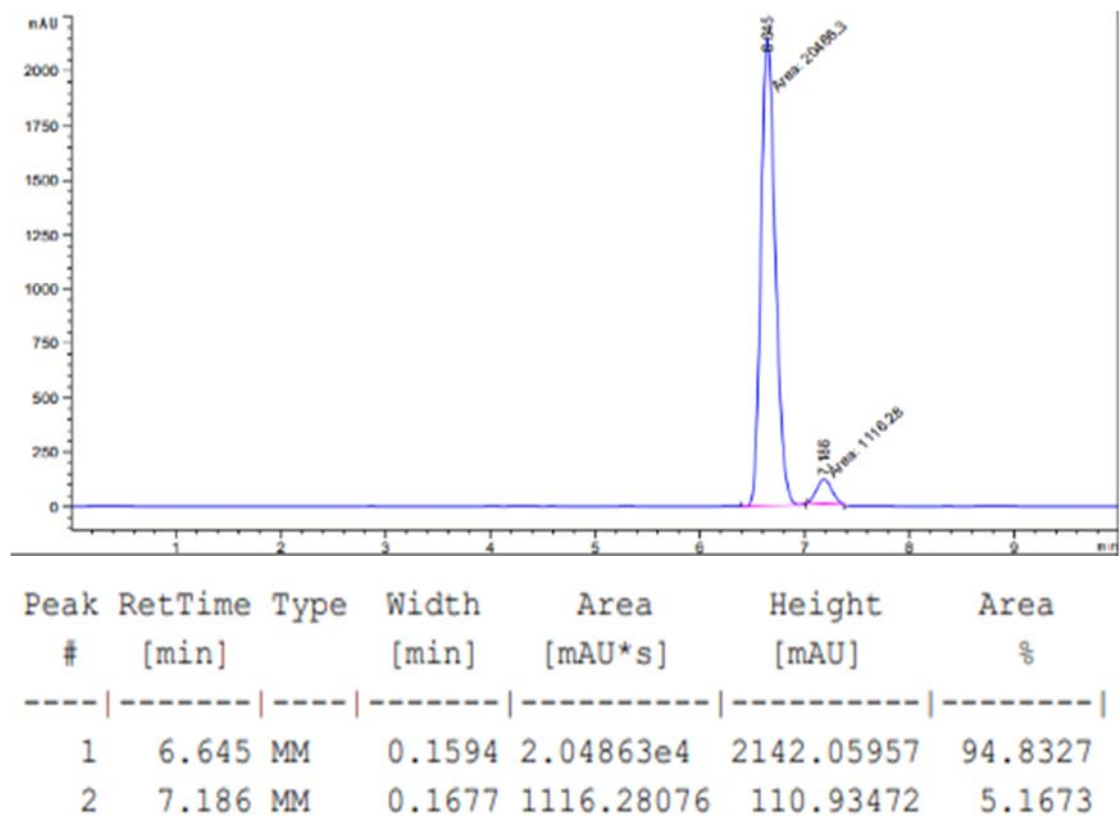

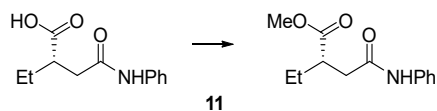

### HPLC data using rac-L1

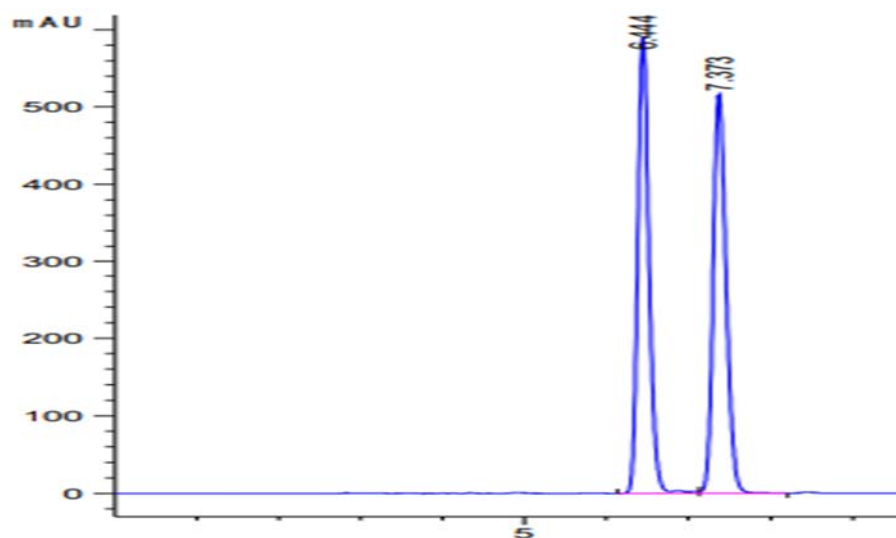

| Peak # | RetTime [min] | Type | Width [min] | Area [mAU*s] | Height [mAU] | Area %  |
|--------|---------------|------|-------------|--------------|--------------|---------|
| 1      | 6.444         | BV R | 0.1471      | 5678.30566   | 590.26971    | 50.2580 |
| 2      | 7.373         | VB   | 0.1671      | 5620.00537   | 515.67517    | 49.7420 |

### HPLC data using L1

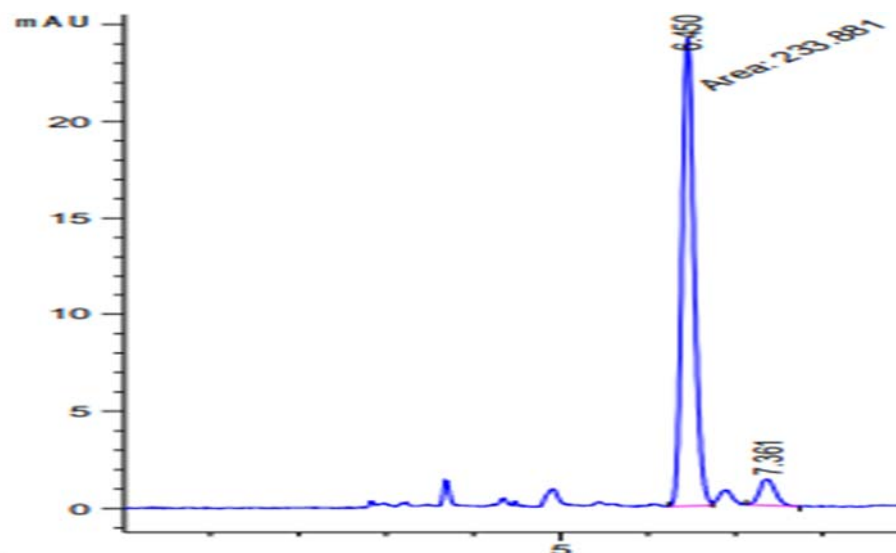

| Peak # | RetTime [min] | Type | Width [min] | Area [mAU*s] | Height [mAU] | Area %  |
|--------|---------------|------|-------------|--------------|--------------|---------|
| 1      | 6.450         | MF   | 0.1610      | 233.88072    | 24.20433     | 93.4002 |
| 2      | 7.361         | BB   | 0.1832      | 16.52632     | 1.34620      | 6.5998  |
